# Supplementary material for: Cross-species analysis of enhancer logic using deep learning
Source: Genome Res. 2020 Dec;30(12):1815–34. doi: 10.1101/gr.260844.120 (PMC7706731; doi:10.1101/gr.260844.120)
Supplement: Supplemental Material [file supp_gr.260844.120_Supplemental_Table_S1.xlsx]

## Sheet: Homer_HumanMEL-vs-HumanMES
Complete output from Homer on differential regions in human MEL lines versus human MES lines.
Motif Name	Consensus	P-value	Log P-value	q-value (Benjamini)	# of Target Sequences with Motif(of 19592)	% of Target Sequences with Motif	# of Background Sequences with Motif(of 30275)	% of Background Sequences with Motif
Sox9(HMG)/Limb-SOX9-ChIP-Seq(GSE73225)/Homer	AGGVNCCTTTGT	1e-1427	-3287	0	7925	0.4045	4892.5	0.1616
Sox10(HMG)/SciaticNerve-Sox3-ChIP-Seq(GSE35132)/Homer	CCWTTGTYYB	1e-1304	-3003	0	11523	0.5882	9652.6	0.3188
Sox3(HMG)/NPC-Sox3-ChIP-Seq(GSE33059)/Homer	CCWTTGTY	1e-1253	-2887	0	12153	0.6204	10695.3	0.3532
Sox15(HMG)/CPA-Sox15-ChIP-Seq(GSE62909)/Homer	RAACAATGGN	1e-1003	-2311	0	8757	0.447	6872.8	0.227
Sox4(HMG)/proB-Sox4-ChIP-Seq(GSE50066)/Homer	YCTTTGTTCC	1e-969	-2232	0	7110	0.3629	4997.2	0.165
Sox2(HMG)/mES-Sox2-ChIP-Seq(GSE11431)/Homer	BCCATTGTTC	1e-934	-2151	0	7529	0.3843	5573.7	0.1841
Sox6(HMG)/Myotubes-Sox6-ChIP-Seq(GSE32627)/Homer	CCATTGTTNY	1e-842	-1941	0	11028	0.5629	10445.8	0.345
Sox17(HMG)/Endoderm-Sox17-ChIP-Seq(GSE61475)/Homer	CCATTGTTYB	1e-741	-1707	0	6259	0.3195	4619	0.1525
AP-2gamma(AP2)/MCF7-TFAP2C-ChIP-Seq(GSE21234)/Homer	SCCTSAGGSCAW	1e-379	-874	0	4223	0.2156	3376.1	0.1115
MITF(bHLH)/MastCells-MITF-ChIP-Seq(GSE48085)/Homer	RTCATGTGAC	1e-367	-845.9	0	4785	0.2443	4082.6	0.1348
AP-2alpha(AP2)/Hela-AP2alpha-ChIP-Seq(GSE31477)/Homer	ATGCCCTGAGGC	1e-315	-726.3	0	3323	0.1696	2567.4	0.0848
SPCH(bHLH)/Seedling-SPCH-ChIP-Seq(GSE57497)/Homer	WNBCACGTGA	1e-242	-559	0	4644	0.2371	4444.7	0.1468
PIF5ox(bHLH)/Arabidopsis-PIF5ox-ChIP-Seq(GSE35062)/Homer	BCACGTGVDN	1e-223	-515.2	0	4696	0.2397	4607.2	0.1522
Usf2(bHLH)/C2C12-Usf2-ChIP-Seq(GSE36030)/Homer	GTCACGTGGT	1e-210	-483.8	0	1721	0.0879	1164.8	0.0385
BIM2(bHLH)/col-BIM2-DAP-Seq(GSE60143)/Homer	NNNNCACGTGNN	1e-201	-464.9	0	4240	0.2164	4139.7	0.1367
PIF4(bHLH)/Seedling-PIF4-ChIP-Seq(GSE35315)/Homer	NNBCACGTGN	1e-199	-460.2	0	5399	0.2756	5663.3	0.187
RUNX2(Runt)/PCa-RUNX2-ChIP-Seq(GSE33889)/Homer	NWAACCACADNN	1e-192	-442.5	0	4297	0.2193	4264.9	0.1409
RUNX(Runt)/HPC7-Runx1-ChIP-Seq(GSE22178)/Homer	SAAACCACAG	1e-183	-422	0	3634	0.1855	3471.7	0.1147
RUNX1(Runt)/Jurkat-RUNX1-ChIP-Seq(GSE29180)/Homer	AAACCACARM	1e-177	-409.8	0	5093	0.26	5391.3	0.1781
USF1(bHLH)/GM12878-Usf1-ChIP-Seq(GSE32465)/Homer	SGTCACGTGR	1e-168	-388	0	1923	0.0982	1505.8	0.0497
BMAL1(bHLH)/Liver-Bmal1-ChIP-Seq(GSE39860)/Homer	GNCACGTG	1e-152	-351	0	7212	0.3681	8515.9	0.2812
RUNX-AML(Runt)/CD4+-PolII-ChIP-Seq(Barski_et_al.)/Homer	GCTGTGGTTW	1e-152	-350.7	0	3633	0.1855	3637.5	0.1201
Cbf1(bHLH)/Yeast-Cbf1-ChIP-Seq(GSE29506)/Homer	TCACGTGAYH	1e-149	-343.5	0	1313	0.067	914.1	0.0302
LEF1(HMG)/H1-LEF1-ChIP-Seq(GSE64758)/Homer	CCTTTGATST	1e-138	-319.3	0	4592	0.2344	4982.4	0.1646
PR(NR)/T47D-PR-ChIP-Seq(GSE31130)/Homer	VAGRACAKNCTGTBC	1e-128	-295.1	0	9247	0.472	11722.6	0.3872
HuR(?)/HEK293-HuR-CLIP-Seq(GSE87887)/Homer	BTTTGGTTTG	1e-111	-257.6	0	15614	0.797	22028.7	0.7275
ERG(ETS)/VCaP-ERG-ChIP-Seq(GSE14097)/Homer	ACAGGAAGTG	1e-107	-248.2	0	6627	0.3383	8074.7	0.2667
Etv2(ETS)/ES-ER71-ChIP-Seq(GSE59402)/Homer	NNAYTTCCTGHN	1e-104	-241.2	0	4155	0.2121	4644.3	0.1534
AT2G33550(Trihelix)/colamp-AT2G33550-DAP-Seq(GSE60143)/Homer	TTTAAGGGCAYTTTT	1e-103	-238.2	0	11566	0.5904	15543.5	0.5133
Foxo1(Forkhead)/RAW-Foxo1-ChIP-Seq(Fan_et_al.)/Homer	CTGTTTAC	1e-103	-237.7	0	8628	0.4404	11055.6	0.3651
Fli1(ETS)/CD8-FLI-ChIP-Seq(GSE20898)/Homer	NRYTTCCGGH	1e-99	-229.6	0	4263	0.2176	4831.1	0.1596
CLOCK(bHLH)/Liver-Clock-ChIP-Seq(GSE39860)/Homer	GHCACGTG	1e-98	-227.3	0	2010	0.1026	1902.4	0.0628
NPAS(bHLH)/Liver-NPAS-ChIP-Seq(GSE39860)/Homer	NVCACGTG	1e-91	-210.5	0	6098	0.3113	7478	0.247
Tcf4(HMG)/Hct116-Tcf4-ChIP-Seq(SRA012054)/Homer	ASATCAAAGGVA	1e-91	-210.4	0	2953	0.1507	3143.7	0.1038
ETV1(ETS)/GIST48-ETV1-ChIP-Seq(GSE22441)/Homer	AACCGGAAGT	1e-90	-208.7	0	5211	0.266	6226.4	0.2056
PHA-4(Forkhead)/cElegans-Embryos-PHA4-ChIP-Seq(modEncode)/Homer	KTGTTTGC	1e-89	-205.9	0	13232	0.6754	18352.4	0.6061
Hoxa13(Homeobox)/ChickenMSG-Hoxa13.Flag-ChIP-Seq(GSE86088)/Homer	CYHATAAAAN	1e-88	-203	0	12765	0.6516	17620.6	0.5819
SeqBias: CA-repeat	CACACACACA	1e-84	-195.1	0	15717	0.8023	22494.4	0.7429
ETV4(ETS)/HepG2-ETV4-ChIP-Seq(ENCODE)/Homer	ACCGGAAGTG	1e-84	-193.9	0	3772	0.1925	4292.2	0.1418
EWS:ERG-fusion(ETS)/CADO_ES1-EWS:ERG-ChIP-Seq(SRA014231)/Homer	ATTTCCTGTN	1e-82	-189.7	0	3988	0.2036	4603.7	0.152
Hoxd11(Homeobox)/ChickenMSG-Hoxd11.Flag-ChIP-Seq(GSE86088)/Homer	VGCCATAAAA	1e-79	-183.9	0	11957	0.6104	16446.5	0.5432
THRb(NR)/Liver-NR1A2-ChIP-Seq(GSE52613)/Homer	TRAGGTCA	1e-79	-183.2	0	12291	0.6274	16977.6	0.5607
ETS1(ETS)/Jurkat-ETS1-ChIP-Seq(GSE17954)/Homer	ACAGGAAGTG	1e-79	-182	0	4251	0.217	4996.5	0.165
ARF2(ARF)/col-ARF2-DAP-Seq(GSE60143)/Homer	TTGTCGGMWN	1e-76	-175.5	0	9367	0.4782	12491.9	0.4126
Hoxa11(Homeobox)/ChickenMSG-Hoxa11.Flag-ChIP-Seq(GSE86088)/Homer	TTTTATGGCM	1e-76	-175.4	0	12009	0.613	16577.9	0.5475
At5g62940(C2C2dof)/col-At5g62940-DAP-Seq(GSE60143)/Homer	WHWHHACTTTTT	1e-75	-173.2	0	15321	0.7821	21943.4	0.7247
Tcf7(HMG)/GM12878-TCF7-ChIP-Seq(Encode)/Homer	CTTTGATGTGSB	1e-71	-164.4	0	2200	0.1123	2305.6	0.0761
AR-halfsite(NR)/LNCaP-AR-ChIP-Seq(GSE27824)/Homer	CCAGGAACAG	1e-69	-159.6	0	12019	0.6135	16687.6	0.5511
MNT(bHLH)/HepG2-MNT-ChIP-Seq(Encode)/Homer	DGCACACGTG	1e-68	-158.4	0	4044	0.2064	4808.7	0.1588
Hoxd10(Homeobox)/ChickenMSG-Hoxd10.Flag-ChIP-Seq(GSE86088)/Homer	GGCMATGAAA	1e-68	-157.3	0	6683	0.3411	8588.7	0.2837
Oct4:Sox17(POU,Homeobox,HMG)/F9-Sox17-ChIP-Seq(GSE44553)/Homer	CCATTGTATGCAAAT	1e-67	-155.9	0	1215	0.062	1102.3	0.0364
NLP7(RWPRK)/col-NLP7-DAP-Seq(GSE60143)/Homer	TGRCCYTTCR	1e-67	-155.2	0	7550	0.3854	9879.7	0.3263
Hoxa9(Homeobox)/ChickenMSG-Hoxa9.Flag-ChIP-Seq(GSE86088)/Homer	RGCAATNAAA	1e-66	-153.5	0	12330	0.6294	17215.2	0.5686
Smad3(MAD)/NPC-Smad3-ChIP-Seq(GSE36673)/Homer	TWGTCTGV	1e-66	-153.3	0	9619	0.491	13006.4	0.4296
EWS:FLI1-fusion(ETS)/SK_N_MC-EWS:FLI1-ChIP-Seq(SRA014231)/Homer	VACAGGAAAT	1e-66	-152.2	0	2477	0.1264	2705.6	0.0894
Erra(NR)/HepG2-Erra-ChIP-Seq(GSE31477)/Homer	CAAAGGTCAG	1e-64	-149.5	0	6999	0.3573	9096.2	0.3004
FOXK1(Forkhead)/HEK293-FOXK1-ChIP-Seq(GSE51673)/Homer	NVWTGTTTAC	1e-64	-149.1	0	6074	0.3101	7744.6	0.2558
GAGA-repeat/SacCer-Promoters/Homer	CTYTCTYTCTCTCTC	1e-64	-148.9	0	15124	0.772	21752	0.7184
EBF2(EBF)/BrownAdipose-EBF2-ChIP-Seq(GSE97114)/Homer	NABTCCCWDGGGAVH	1e-63	-146.4	0	3501	0.1787	4108.9	0.1357
Hoxd13(Homeobox)/ChickenMSG-Hoxd13.Flag-ChIP-Seq(GSE86088)/Homer	NCYAATAAAA	1e-63	-145.9	0	9266	0.473	12514.6	0.4133
EHF(ETS)/LoVo-EHF-ChIP-Seq(GSE49402)/Homer	AVCAGGAAGT	1e-62	-144.6	0	5716	0.2918	7249.5	0.2394
NPAS2(bHLH)/Liver-NPAS2-ChIP-Seq(GSE39860)/Homer	KCCACGTGAC	1e-62	-142.9	0	3961	0.2022	4761.4	0.1573
Nkx3.1(Homeobox)/LNCaP-Nkx3.1-ChIP-Seq(GSE28264)/Homer	AAGCACTTAA	1e-61	-142.1	0	9104	0.4647	12293	0.406
Max(bHLH)/K562-Max-ChIP-Seq(GSE31477)/Homer	RCCACGTGGYYN	1e-60	-138.3	0	2443	0.1247	2708.7	0.0895
TFE3(bHLH)/MEF-TFE3-ChIP-Seq(GSE75757)/Homer	GTCACGTGACYV	1e-59	-136.3	0	407	0.0208	249	0.0082
Fox:Ebox(Forkhead,bHLH)/Panc1-Foxa2-ChIP-Seq(GSE47459)/Homer	NNNVCTGWGYAAACASN	1e-58	-134.2	0	4934	0.2519	6179.6	0.2041
Elf4(ETS)/BMDM-Elf4-ChIP-Seq(GSE88699)/Homer	ACTTCCKGKT	1e-57	-132.4	0	3964	0.2023	4814.8	0.159
Nur77(NR)/K562-NR4A1-ChIP-Seq(GSE31363)/Homer	TGACCTTTNCNT	1e-57	-132.4	0	1276	0.0651	1229.5	0.0406
bHLHE41(bHLH)/proB-Bhlhe41-ChIP-Seq(GSE93764)/Homer	KCACGTGMCN	1e-57	-131.5	0	2981	0.1522	3458.6	0.1142
PABPC1(?)/MEL-PABC1-CLIP-Seq(GSE69755)/Homer	HAATAAAGNN	1e-56	-130.3	0	10784	0.5505	14947.9	0.4937
SGR5(C2H2)/colamp-SGR5-DAP-Seq(GSE60143)/Homer	TTTGTCTTTTTT	1e-56	-129.7	0	4159	0.2123	5101.6	0.1685
GABPA(ETS)/Jurkat-GABPa-ChIP-Seq(GSE17954)/Homer	RACCGGAAGT	1e-56	-129.2	0	3292	0.168	3894.5	0.1286
IBL1(bHLH)/Seedling-IBL1-ChIP-Seq(GSE51120)/Homer	CACGTGCC	1e-54	-126	0	4298	0.2194	5316	0.1756
CDX4(Homeobox)/ZebrafishEmbryos-Cdx4.Myc-ChIP-Seq(GSE48254)/Homer	NGYCATAAAWCH	1e-54	-124.9	0	5471	0.2793	7003.9	0.2313
ERRg(NR)/Kidney-ESRRG-ChIP-Seq(GSE104905)/Homer	GTGACCTTGRVN	1e-54	-124.5	0	3157	0.1612	3729.7	0.1232
Esrrb(NR)/mES-Esrrb-ChIP-Seq(GSE11431)/Homer	KTGACCTTGA	1e-53	-124.2	0	2603	0.1329	2975.2	0.0983
COUP-TFII(NR)/K562-NR2F1-ChIP-Seq(Encode)/Homer	GKBCARAGGTCA	1e-53	-123.9	0	4918	0.251	6211.9	0.2052
Ets1-distal(ETS)/CD4+-PolII-ChIP-Seq(Barski_et_al.)/Homer	MACAGGAAGT	1e-53	-123.7	0	1528	0.078	1566.8	0.0517
Foxf1(Forkhead)/Lung-Foxf1-ChIP-Seq(GSE77951)/Homer	WWATRTAAACAN	1e-53	-123.6	0	5623	0.287	7231.2	0.2388
WUS1(Homeobox)/colamp-WUS1-DAP-Seq(GSE60143)/Homer	CAWTCATTCA	1e-53	-123.2	0	2855	0.1457	3321.6	0.1097
SPDEF(ETS)/VCaP-SPDEF-ChIP-Seq(SRA014231)/Homer	ASWTCCTGBT	1e-53	-122.8	0	4066	0.2076	5004.7	0.1653
ELF3(ETS)/PDAC-ELF3-ChIP-Seq(GSE64557)/Homer	ANCAGGAAGT	1e-52	-121.1	0	3502	0.1788	4222.3	0.1394
KAN2(G2like)/colamp-KAN2-DAP-Seq(GSE60143)/Homer	ATATTCTY	1e-52	-120.5	0	8087	0.4128	10896	0.3599
ZFX(Zf)/mES-Zfx-ChIP-Seq(GSE11431)/Homer	AGGCCTRG	1e-52	-119.9	0	3864	0.1972	4734.4	0.1564
EBF1(EBF)/Near-E2A-ChIP-Seq(GSE21512)/Homer	GTCCCCWGGGGA	1e-51	-119.5	0	3402	0.1737	4090.2	0.1351
ELF5(ETS)/T47D-ELF5-ChIP-Seq(GSE30407)/Homer	ACVAGGAAGT	1e-51	-118.7	0	3322	0.1696	3983.9	0.1316
Mef2b(MADS)/HEK293-Mef2b.V5-ChIP-Seq(GSE67450)/Homer	GCTATTTTTGGM	1e-50	-117.3	0	5178	0.2643	6623.9	0.2188
dof45(C2C2dof)/col-dof45-DAP-Seq(GSE60143)/Homer	NVAWAAAGTN	1e-50	-116.7	0	13196	0.6736	18833.3	0.622
TATA-Box(TBP)/Promoter/Homer	CCTTTTAWAGSC	1e-50	-115.9	0	6815	0.3479	9028.1	0.2982
IDD4(C2H2)/col-IDD4-DAP-Seq(GSE60143)/Homer	TTTGTCTTTWTB	1e-49	-113.9	0	5536	0.2826	7162.8	0.2366
Hoxd12(Homeobox)/ChickenMSG-Hoxd12.Flag-ChIP-Seq(GSE86088)/Homer	HDGYAATGAAAN	1e-49	-113.2	0	9875	0.5041	13664.6	0.4513
Nkx6.1(Homeobox)/Islet-Nkx6.1-ChIP-Seq(GSE40975)/Homer	GKTAATGR	1e-49	-113.1	0	12512	0.6387	17773.6	0.587
HOXB13(Homeobox)/ProstateTumor-HOXB13-ChIP-Seq(GSE56288)/Homer	TTTTATKRGG	1e-48	-110.9	0	6144	0.3136	8070.6	0.2665
RARa(NR)/K562-RARa-ChIP-Seq(Encode)/Homer	TTGAMCTTTG	1e-48	-110.8	0	9868	0.5037	13671.3	0.4515
FoxL2(Forkhead)/Ovary-FoxL2-ChIP-Seq(GSE60858)/Homer	WWTRTAAACAVG	1e-47	-110.4	0	5146	0.2627	6617.2	0.2185
Nanog(Homeobox)/mES-Nanog-ChIP-Seq(GSE11724)/Homer	RGCCATTAAC	1e-47	-109.9	0	14807	0.7558	21477	0.7093
MYB73(MYB)/col-MYB73-DAP-Seq(GSE60143)/Homer	NNNNHAACNGHHDHN	1e-47	-109.5	0	9757	0.4981	13510.3	0.4462
FOXA1(Forkhead)/LNCAP-FOXA1-ChIP-Seq(GSE27824)/Homer	WAAGTAAACA	1e-47	-109.5	0	6813	0.3478	9067.9	0.2995
Pitx1(Homeobox)/Chicken-Pitx1-ChIP-Seq(GSE38910)/Homer	TAATCCCN	1e-47	-108.7	0	15099	0.7708	21962.5	0.7253
E-box(bHLH)/Promoter/Homer	SSGGTCACGTGA	1e-46	-108.2	0	264	0.0135	144.2	0.0048
FOXA1(Forkhead)/MCF7-FOXA1-ChIP-Seq(GSE26831)/Homer	WAAGTAAACA	1e-46	-107.8	0	5811	0.2966	7601.8	0.2511
AT1G47655(C2C2dof)/colamp-AT1G47655-DAP-Seq(GSE60143)/Homer	YHACTTTTTS	1e-46	-107.4	0	15147	0.7732	22049.7	0.7282
SeqBias: GA-repeat	GAGAGAGAGA	1e-45	-105.9	0	17644	0.9007	26260	0.8673
OBP3(C2C2dof)/col-OBP3-DAP-Seq(GSE60143)/Homer	NYWACTTTTT	1e-45	-105.1	0	14189	0.7243	20508.6	0.6773
Elk1(ETS)/Hela-Elk1-ChIP-Seq(GSE31477)/Homer	HACTTCCGGY	1e-45	-104.9	0	1580	0.0807	1690.4	0.0558
EAR2(NR)/K562-NR2F6-ChIP-Seq(Encode)/Homer	NRBCARRGGTCA	1e-45	-104.9	0	4375	0.2233	5539.7	0.183
STZ(C2H2)/colamp-STZ-DAP-Seq(GSE60143)/Homer	HNBTCACT	1e-45	-104.5	0	17260	0.8811	25603.1	0.8456
AT5G45580(G2like)/colamp-AT5G45580-DAP-Seq(GSE60143)/Homer	ADRGAATCTH	1e-45	-104	0	8562	0.4371	11729.1	0.3874
bHLHE40(bHLH)/HepG2-BHLHE40-ChIP-Seq(GSE31477)/Homer	KCACGTGMCN	1e-45	-103.9	0	902	0.046	843.6	0.0279
TEAD3(TEA)/HepG2-TEAD3-ChIP-Seq(Encode)/Homer	TRCATTCCAG	1e-45	-103.7	0	5385	0.2749	7005.3	0.2314
Zac1(Zf)/Neuro2A-Plagl1-ChIP-Seq(GSE75942)/Homer	HAWGRGGCCM	1e-44	-103	0	7952	0.4059	10815.3	0.3572
SCL(bHLH)/HPC7-Scl-ChIP-Seq(GSE13511)/Homer	AVCAGCTG	1e-44	-102.7	0	13023	0.6648	18659.3	0.6163
Mef2c(MADS)/GM12878-Mef2c-ChIP-Seq(GSE32465)/Homer	DCYAAAAATAGM	1e-44	-102.5	0	3053	0.1558	3686.7	0.1218
Foxo3(Forkhead)/U2OS-Foxo3-ChIP-Seq(E-MTAB-2701)/Homer	DGTAAACA	1e-44	-101.9	0	4436	0.2264	5644.4	0.1864
REF6(Zf)/Arabidopsis-REF6-ChIP-Seq(GSE106942)/Homer	TVCTCTGTTT	1e-43	-100.8	0	3011	0.1537	3636.8	0.1201
At3g24120(G2like)/col-At3g24120-DAP-Seq(GSE60143)/Homer	NWWAGMATMW	1e-43	-100.3	0	13701	0.6994	19759.5	0.6526
MYB88(MYB)/col-MYB88-DAP-Seq(GSE60143)/Homer	HNACGCTCCT	1e-43	-99.71	0	3636	0.1856	4517.2	0.1492
COUP-TFII(NR)/Artia-Nr2f2-ChIP-Seq(GSE46497)/Homer	AGRGGTCA	1e-42	-98.14	0	5475	0.2795	7172.2	0.2369
AT2G38300(G2like)/col-AT2G38300-DAP-Seq(GSE60143)/Homer	ADRGAATGTT	1e-42	-97.95	0	8442	0.4309	11592.9	0.3829
OBP1(C2C2dof)/col-OBP1-DAP-Seq(GSE60143)/Homer	NHHACTTTWT	1e-42	-97.76	0	13857	0.7074	20028.4	0.6615
AT2G40260(G2like)/colamp-AT2G40260-DAP-Seq(GSE60143)/Homer	WAAAYATTCTTT	1e-42	-97.62	0	9632	0.4917	13408.4	0.4428
At5g04390(C2H2)/col200-At5g04390-DAP-Seq(GSE60143)/Homer	AGTGANDN	1e-41	-96.07	0	17081	0.8719	25346.3	0.8371
FoxD3(forkhead)/ZebrafishEmbryo-Foxd3.biotin-ChIP-seq(GSE106676)/Homer	TGTTTAYTTAGC	1e-41	-95.43	0	4937	0.252	6406.6	0.2116
AtHB32(ZFHD)/col200-AtHB32-DAP-Seq(GSE60143)/Homer	CGAATTAT	1e-40	-93.4	0	7679	0.392	10475.2	0.346
n-Myc(bHLH)/mES-nMyc-ChIP-Seq(GSE11431)/Homer	VRCCACGTGG	1e-40	-92.76	0	2115	0.108	2444.9	0.0807
TEAD1(TEAD)/HepG2-TEAD1-ChIP-Seq(Encode)/Homer	CYRCATTCCA	1e-39	-91.63	0	4629	0.2363	5984.8	0.1977
c-Myc(bHLH)/LNCAP-cMyc-ChIP-Seq(Unpublished)/Homer	VCCACGTG	1e-39	-91.08	0	1106	0.0565	1127.9	0.0373
AT5G02460(C2C2dof)/col-AT5G02460-DAP-Seq(GSE60143)/Homer	CHCCTTTT	1e-39	-90.94	0	11140	0.5687	15791.6	0.5215
bHLH74(bHLH)/col-bHLH74-DAP-Seq(GSE60143)/Homer	DRATCACGTGAB	1e-39	-90.39	0	654	0.0334	579.3	0.0191
KLF14(Zf)/HEK293-KLF14.GFP-ChIP-Seq(GSE58341)/Homer	RGKGGGCGKGGC	1e-38	-88.93	0	3336	0.1703	4152	0.1371
MYB101(MYB)/colamp-MYB101-DAP-Seq(GSE60143)/Homer	TAACNRMY	1e-38	-88.66	0	8465	0.4321	11699.6	0.3864
At3g60580(C2H2)/col-At3g60580-DAP-Seq(GSE60143)/Homer	WTTYTACT	1e-38	-88.5	0	16853	0.8603	25007.3	0.8259
KANADI1(Myb)/Seedling-KAN1-ChIP-Seq(GSE48081)/Homer	ARGAATAWWN	1e-38	-88.29	0	7322	0.3738	9978.6	0.3296
Initiator/Drosophila-Promoters/Homer	NTCAGTYG	1e-38	-87.81	0	9517	0.4858	13310.4	0.4396
BMYB(HTH)/Hela-BMYB-ChIP-Seq(GSE27030)/Homer	NHAACBGYYV	1e-37	-87.13	0	6242	0.3186	8378	0.2767
Nkx2.5(Homeobox)/HL1-Nkx2.5.biotin-ChIP-Seq(GSE21529)/Homer	RRSCACTYAA	1e-37	-86.88	0	8292	0.4233	11451.2	0.3782
Smad4(MAD)/ESC-SMAD4-ChIP-Seq(GSE29422)/Homer	VBSYGTCTGG	1e-37	-86.72	0	4876	0.2489	6374.4	0.2105
Elk4(ETS)/Hela-Elk4-ChIP-Seq(GSE31477)/Homer	NRYTTCCGGY	1e-36	-84.08	0	1611	0.0822	1804.2	0.0596
ATAF1(NAC)/col-ATAF1-DAP-Seq(GSE60143)/Homer	YACGTMAY	1e-36	-83.91	0	5334	0.2723	7062.3	0.2332
PU.1(ETS)/ThioMac-PU.1-ChIP-Seq(GSE21512)/Homer	AGAGGAAGTG	1e-36	-83.63	0	2086	0.1065	2444.1	0.0807
ANAC045(NAC)/col-ANAC045-DAP-Seq(GSE60143)/Homer	DNCKTVNNNNNNAMG	1e-36	-83.3	0	6815	0.3479	9258.7	0.3058
Tcf3(HMG)/mES-Tcf3-ChIP-Seq(GSE11724)/Homer	ASWTCAAAGG	1e-35	-82.81	0	1642	0.0838	1850.1	0.0611
Ap4(bHLH)/AML-Tfap4-ChIP-Seq(GSE45738)/Homer	NAHCAGCTGD	1e-35	-82.45	0	4227	0.2158	5462.9	0.1804
Smad2(MAD)/ES-SMAD2-ChIP-Seq(GSE29422)/Homer	CTGTCTGG	1e-35	-82.01	0	4907	0.2505	6451.7	0.2131
BBX31(Orphan)/col-BBX31-DAP-Seq(GSE60143)/Homer	NAAAAAGTDA	1e-35	-81.76	0	9247	0.472	12947	0.4276
RBFox2(?)/Heart-RBFox2-CLIP-Seq(GSE57926)/Homer	TGCATGCA	1e-35	-81.23	0	7906	0.4036	10913	0.3604
SPL9(SBP)/colamp-SPL9-DAP-Seq(GSE60143)/Homer	BTGTACTT	1e-34	-80.32	0	7525	0.3841	10346.7	0.3417
IRF4(IRF)/GM12878-IRF4-ChIP-Seq(GSE32465)/Homer	ACTGAAACCA	1e-34	-80.2	0	2280	0.1164	2726	0.09
FOXM1(Forkhead)/MCF7-FOXM1-ChIP-Seq(GSE72977)/Homer	TRTTTACTTW	1e-34	-79.62	0	5731	0.2925	7677.6	0.2536
WT1(Zf)/Kidney-WT1-ChIP-Seq(GSE90016)/Homer	MCTCCCMCRCAB	1e-34	-78.68	0	1520	0.0776	1704.8	0.0563
Mef2d(MADS)/Retina-Mef2d-ChIP-Seq(GSE61391)/Homer	GCTATTTTTAGC	1e-33	-77.92	0	1389	0.0709	1534.9	0.0507
Hoxa10(Homeobox)/ChickenMSG-Hoxa10.Flag-ChIP-Seq(GSE86088)/Homer	GGYAATGAAA	1e-33	-76.74	0	3679	0.1878	4711.4	0.1556
OCT:OCT-short(POU,Homeobox)/NPC-OCT6-ChIP-Seq(GSE43916)/Homer	ATGCATWATGCATRW	1e-33	-76.55	0	4826	0.2464	6371.1	0.2104
Egr1(Zf)/K562-Egr1-ChIP-Seq(GSE32465)/Homer	TGCGTGGGYG	1e-33	-76.49	0	1488	0.076	1670.9	0.0552
MYB33(MYB)/col-MYB33-DAP-Seq(GSE60143)/Homer	DDTYNGTTAN	1e-32	-75.25	0	8761	0.4472	12261.8	0.405
AT1G49560(G2like)/colamp-AT1G49560-DAP-Seq(GSE60143)/Homer	GAWTCTNWDA	1e-32	-74.79	0	6688	0.3414	9136.5	0.3017
Trl(Zf)/S2-GAGAfactor-ChIP-Seq(GSE40646)/Homer	RGAGAGAG	1e-32	-74.69	0	8784	0.4484	12301.7	0.4063
STAT4(Stat)/CD4-Stat4-ChIP-Seq(GSE22104)/Homer	NYTTCCWGGAAR	1e-32	-74.64	0	4976	0.254	6604.3	0.2181
MYB(HTH)/ERMYB-Myb-ChIPSeq(GSE22095)/Homer	GGCVGTTR	1e-32	-74.33	0	6842	0.3493	9370.9	0.3095
SPL15(SBP)/colamp-SPL15-DAP-Seq(GSE60143)/Homer	WDWMMGTACADW	1e-32	-73.71	0	5494	0.2804	7372	0.2435
AZF1(C2H2)/colamp-AZF1-DAP-Seq(GSE60143)/Homer	DKSWCACT	1e-31	-73.33	0	15911	0.8122	23548.5	0.7777
dof43(C2C2dof)/colamp-dof43-DAP-Seq(GSE60143)/Homer	NAAAAAGTDA	1e-31	-73.24	0	8622	0.4401	12067.9	0.3986
ANAC038(NAC)/col-ANAC038-DAP-Seq(GSE60143)/Homer	ACACGTWAYC	1e-31	-72.87	0	8014	0.4091	11147.2	0.3682
VND6(NAC)/col-VND6-DAP-Seq(GSE60143)/Homer	DCTTNHTTTTYAMGY	1e-31	-72.83	0	3926	0.2004	5091.1	0.1681
E-box/Arabidopsis-Promoters/Homer	GCCACGTG	1e-31	-72.71	0	1104	0.0564	1181.7	0.039
HOXD13(Homeobox)/Chicken-Hoxd13-ChIP-Seq(GSE38910)/Homer	NCYAATAAAA	1e-31	-72.41	0	6612	0.3375	9042.7	0.2986
FOXP1(Forkhead)/H9-FOXP1-ChIP-Seq(GSE31006)/Homer	NYYTGTTTACHN	1e-31	-72.29	0	2587	0.1321	3191.9	0.1054
At2g01060(G2like)/colamp-At2g01060-DAP-Seq(GSE60143)/Homer	AGATKCBNWW	1e-31	-71.83	0	13535	0.6909	19725	0.6514
Pit1(Homeobox)/GCrat-Pit1-ChIP-Seq(GSE58009)/Homer	ATGMATATDC	1e-31	-71.41	0	6157	0.3143	8372.2	0.2765
ZNF711(Zf)/SHSY5Y-ZNF711-ChIP-Seq(GSE20673)/Homer	AGGCCTAG	1e-30	-71.06	0	4605	0.2351	6088.5	0.2011
EGL-5(Homeobox)/cElegans-L3-EGL5-ChIP-Seq(modEncode)/Homer	ATTTAATGGG	1e-30	-70.67	0	7953	0.406	11074.1	0.3657
Cdx2(Homeobox)/mES-Cdx2-ChIP-Seq(GSE14586)/Homer	GYMATAAAAH	1e-30	-70.65	0	4452	0.2273	5868.7	0.1938
ANAC070(NAC)/colamp-ANAC070-DAP-Seq(GSE60143)/Homer	CTTRHDNHNBAAGHW	1e-30	-70.49	0	4925	0.2514	6560.5	0.2167
bHLH34(bHLH)/colamp-bHLH34-DAP-Seq(GSE60143)/Homer	HGWGRHWGACACGTG	1e-30	-69.64	0	794	0.0405	797.2	0.0263
ERF15(AP2EREBP)/colamp-ERF15-DAP-Seq(GSE60143)/Homer	WDHAGCMGCCAT	1e-30	-69.47	0	4582	0.2339	6066.4	0.2004
caudal(Homeobox)/Drosophila-Embryos-ChIP-Chip(modEncode)/Homer	GGYCATAAAW	1e-30	-69.42	0	4800	0.245	6385.5	0.2109
Adof1(C2C2dof)/col-Adof1-DAP-Seq(GSE60143)/Homer	NRWAAAGYDV	1e-30	-69.4	0	13228	0.6752	19258.1	0.636
HY5(bZIP)/colamp-HY5-DAP-Seq(GSE60143)/Homer	RRTSACGTSD	1e-29	-68.97	0	1899	0.0969	2256.2	0.0745
SMB(NAC)/colamp-SMB-DAP-Seq(GSE60143)/Homer	CTTVNNNNDBAAGHW	1e-29	-68.2	0	3596	0.1836	4647.5	0.1535
PGR(NR)/EndoStromal-PGR-ChIP-Seq(GSE69539)/Homer	AAGAACATWHTGTTC	1e-29	-67.49	0	1350	0.0689	1523	0.0503
CRX(Homeobox)/Retina-Crx-ChIP-Seq(GSE20012)/Homer	GCTAATCC	1e-29	-67.39	0	9726	0.4965	13810.8	0.4561
MYB65(MYB)/colamp-MYB65-DAP-Seq(GSE60143)/Homer	RACNGTTA	1e-29	-67.25	0	5438	0.2776	7340.5	0.2424
RAP211(AP2EREBP)/colamp-RAP211-DAP-Seq(GSE60143)/Homer	RGCCGGCYWW	1e-29	-67.1	0	3845	0.1963	5013.7	0.1656
Pho2(bHLH)/Yeast-Pho2-ChIP-Seq(GSE29506)/Homer	CCCACGTGCT	1e-28	-66.1	0	944	0.0482	997.3	0.0329
ARE(NR)/LNCAP-AR-ChIP-Seq(GSE27824)/Homer	RGRACASNSTGTYCYB	1e-28	-65.79	0	1014	0.0518	1088.1	0.0359
Mef2a(MADS)/HL1-Mef2a.biotin-ChIP-Seq(GSE21529)/Homer	CYAAAAATAG	1e-28	-65.44	0	2699	0.1378	3387.3	0.1119
TEAD(TEA)/Fibroblast-PU.1-ChIP-Seq(Unpublished)/Homer	YCWGGAATGY	1e-28	-65.05	0	3463	0.1768	4477.9	0.1479
VND2(NAC)/col-VND2-DAP-Seq(GSE60143)/Homer	DNCKTNNNNNNNAAG	1e-28	-64.93	0	3523	0.1798	4564.8	0.1508
TEAD4(TEA)/Tropoblast-Tead4-ChIP-Seq(GSE37350)/Homer	CCWGGAATGY	1e-27	-64.41	0	3638	0.1857	4733.8	0.1563
ELF1(ETS)/Jurkat-ELF1-ChIP-Seq(SRA014231)/Homer	AVCCGGAAGT	1e-27	-64.32	0	1378	0.0703	1572.4	0.0519
SPL1(SBP)/colamp-SPL1-DAP-Seq(GSE60143)/Homer	HYGTACDTWH	1e-27	-63.96	0	7053	0.36	9776	0.3229
Bapx1(Homeobox)/VertebralCol-Bapx1-ChIP-Seq(GSE36672)/Homer	TTRAGTGSYK	1e-27	-63.54	0	7860	0.4012	10998.4	0.3632
ANAC046(NAC)/colamp-ANAC046-DAP-Seq(GSE60143)/Homer	ACACGYWAYC	1e-27	-63.29	0	7363	0.3759	10249.9	0.3385
FEA4(bZIP)/Corn-FEA4-ChIP-Seq(GSE61954)/Homer	TGACGTCACS	1e-27	-62.32	0	3487	0.178	4530	0.1496
BIM3(bHLH)/col-BIM3-DAP-Seq(GSE60143)/Homer	TWVTCACGTGAB	1e-27	-62.23	0	380	0.0194	319.5	0.0106
HLF(bZIP)/HSC-HLF.Flag-ChIP-Seq(GSE69817)/Homer	RTTATGYAAB	1e-26	-62.14	0	4725	0.2412	6331.5	0.2091
bZIP3(bZIP)/col-bZIP3-DAP-Seq(GSE60143)/Homer	DWKNHSACGTGGCAD	1e-26	-61.9	0	1607	0.082	1891.2	0.0625
Foxa2(Forkhead)/Liver-Foxa2-ChIP-Seq(GSE25694)/Homer	CYTGTTTACWYW	1e-26	-61.43	0	4329	0.221	5757.2	0.1901
AT4G37180(G2like)/col-AT4G37180-DAP-Seq(GSE60143)/Homer	AGAATCTTNN	1e-26	-61.19	0	6608	0.3373	9133.2	0.3016
c-Myc(bHLH)/mES-cMyc-ChIP-Seq(GSE11431)/Homer	VVCCACGTGG	1e-25	-59.77	0	1535	0.0784	1803.3	0.0596
Isl1(Homeobox)/Neuron-Isl1-ChIP-Seq(GSE31456)/Homer	CTAATKGV	1e-25	-59.37	0	8947	0.4567	12693.5	0.4192
AT2G28810(C2C2dof)/colamp-AT2G28810-DAP-Seq(GSE60143)/Homer	VAAAAAGTWA	1e-25	-59.2	0	11572	0.5907	16751.5	0.5532
ETS:RUNX(ETS,Runt)/Jurkat-RUNX1-ChIP-Seq(GSE17954)/Homer	RCAGGATGTGGT	1e-25	-58.84	0	347	0.0177	288.4	0.0095
GRE(NR),IR3/RAW264.7-GRE-ChIP-Seq(Unpublished)/Homer	VAGRACAKWCTGTYC	1e-25	-58.57	0	1078	0.055	1197.8	0.0396
SeqBias: CG bias	SSSSSSSSSS	1e-25	-58.41	0	13401	0.6841	19636.8	0.6485
Rbpj1(?)/Panc1-Rbpj1-ChIP-Seq(GSE47459)/Homer	HTTTCCCASG	1e-25	-58.18	0	5781	0.2951	7925.2	0.2617
VRN1(ABI3VP1)/col-VRN1-DAP-Seq(GSE60143)/Homer	TTTTTTTTTT	1e-25	-57.9	0	1363	0.0696	1579	0.0522
AT3G12130(C3H)/colamp-AT3G12130-DAP-Seq(GSE60143)/Homer	TMACTTTTTV	1e-25	-57.66	0	11864	0.6056	17223.2	0.5688
MYB56(MYB)/colamp-MYB56-DAP-Seq(GSE60143)/Homer	HTAACGRMHY	1e-24	-57.2	0	3541	0.1808	4644.5	0.1534
Bcl11a(Zf)/HSPC-BCL11A-ChIP-Seq(GSE104676)/Homer	TYTGACCASWRG	1e-24	-56.86	0	2662	0.1359	3387.5	0.1119
MYB81(MYB)/col-MYB81-DAP-Seq(GSE60143)/Homer	NWAACSGWTWNN	1e-24	-56.84	0	7363	0.3759	10310.2	0.3405
SPL11(SBP)/col100-SPL11-DAP-Seq(GSE60143)/Homer	YTGTACTTBH	1e-24	-56.82	0	3100	0.1582	4012	0.1325
AMYB(HTH)/Testes-AMYB-ChIP-Seq(GSE44588)/Homer	TGGCAGTTGG	1e-24	-56.25	0	5909	0.3016	8133.6	0.2686
AT3G52440(C2C2dof)/colamp-AT3G52440-DAP-Seq(GSE60143)/Homer	DTHACTTTTT	1e-24	-56.24	0	11870	0.6059	17247.3	0.5696
NFIL3(bZIP)/HepG2-NFIL3-ChIP-Seq(Encode)/Homer	VTTACGTAAYNNNNN	1e-24	-56.23	0	3534	0.1804	4641.8	0.1533
STAT6(Stat)/Macrophage-Stat6-ChIP-Seq(GSE38377)/Homer	TTCCKNAGAA	1e-23	-55.06	0	3221	0.1644	4198.8	0.1387
HOXA9(Homeobox)/HSC-Hoxa9-ChIP-Seq(GSE33509)/Homer	GGCCATAAATCA	1e-23	-54.99	0	3853	0.1967	5113.4	0.1689
At3g12730(G2like)/colamp-At3g12730-DAP-Seq(GSE60143)/Homer	AAGATTCT	1e-23	-54.89	0	7837	0.4001	11047.9	0.3649
Bcl6(Zf)/Liver-Bcl6-ChIP-Seq(GSE31578)/Homer	NNNCTTTCCAGGAAA	1e-23	-54.74	0	6108	0.3118	8444.2	0.2789
At4g36780(BZR)/col-At4g36780-DAP-Seq(GSE60143)/Homer	NNNNNNCACGTGNNN	1e-23	-54.62	0	808	0.0412	860.9	0.0284
Zfp281(Zf)/ES-Zfp281-ChIP-Seq(GSE81042)/Homer	CCCCTCCCCCAC	1e-23	-54.59	0	431	0.022	394	0.013
Sp5(Zf)/mES-Sp5.Flag-ChIP-Seq(GSE72989)/Homer	RGKGGGCGGAGC	1e-23	-53.96	0	1674	0.0855	2021.8	0.0668
dof42(C2C2dof)/col-dof42-DAP-Seq(GSE60143)/Homer	AAAAAGGC	1e-23	-53.58	0	3548	0.1811	4681.2	0.1546
At1g78700(BZR)/col-At1g78700-DAP-Seq(GSE60143)/Homer	NNNNCACGTGNNNNN	1e-23	-53.55	0	820	0.0419	879.2	0.029
FOXK2(Forkhead)/U2OS-FOXK2-ChIP-Seq(E-MTAB-2204)/Homer	SCHTGTTTACAT	1e-23	-52.99	0	3518	0.1796	4642.6	0.1533
Nkx2.1(Homeobox)/LungAC-Nkx2.1-ChIP-Seq(GSE43252)/Homer	RSCACTYRAG	1e-22	-52.37	0	9850	0.5028	14152.8	0.4674
bZIP:IRF(bZIP,IRF)/Th17-BatF-ChIP-Seq(GSE39756)/Homer	NAGTTTCABTHTGACTNW	1e-22	-52.03	0	2538	0.1296	3242	0.1071
PIF7(bHLH)/col-PIF7-DAP-Seq(GSE60143)/Homer	CCACGTGGNH	1e-22	-51.88	0	545	0.0278	537.8	0.0178
LXH9(Homeobox)/Hct116-LXH9.V5-ChIP-Seq(GSE116822)/Homer	NGCTAATTAG	1e-22	-51.73	0	7476	0.3816	10532	0.3478
AtIDD11(C2H2)/colamp-AtIDD11-DAP-Seq(GSE60143)/Homer	TTTGTCGTTT	1e-22	-50.98	0	2125	0.1085	2665.4	0.088
AtGRF6(GRF)/col-AtGRF6-DAP-Seq(GSE60143)/Homer	NTGTCAGADNNNNNN	1e-22	-50.98	0	4450	0.2272	6019.1	0.1988
bZIP52(bZIP)/colamp-bZIP52-DAP-Seq(GSE60143)/Homer	NDNHCAGCTGTCANN	1e-22	-50.96	0	5607	0.2862	7732.4	0.2554
WRKY18(WRKY)/col-WRKY18-DAP-Seq(GSE60143)/Homer	NNNTTGACYWNNNNN	1e-21	-50.13	0	6236	0.3183	8680.5	0.2867
NST1(NAC)/colamp-NST1-DAP-Seq(GSE60143)/Homer	WRCTTRWWNWWYAAG	1e-21	-50.08	0	3927	0.2005	5260.9	0.1738
CEBP(bZIP)/ThioMac-CEBPb-ChIP-Seq(GSE21512)/Homer	ATTGCGCAAC	1e-21	-49.66	0	3552	0.1813	4717.7	0.1558
NFAT(RHD)/Jurkat-NFATC1-ChIP-Seq(Jolma_et_al.)/Homer	ATTTTCCATT	1e-21	-48.67	0	4755	0.2427	6489.3	0.2143
Maz(Zf)/HepG2-Maz-ChIP-Seq(GSE31477)/Homer	GGGGGGGG	1e-21	-48.45	0	2356	0.1203	3007.8	0.0993
ANAC071(NAC)/col-ANAC071-DAP-Seq(GSE60143)/Homer	DNCKTNDNNNHNAAG	1e-20	-48.18	0	3143	0.1604	4136.6	0.1366
AT5G60130(ABI3VP1)/col-AT5G60130-DAP-Seq(GSE60143)/Homer	WTTYTAAGVAAA	1e-20	-48.14	0	10757	0.5491	15601.4	0.5153
ATHB6(Homeobox)/col-ATHB6-DAP-Seq(GSE60143)/Homer	AATGATTG	1e-20	-47.71	0	7390	0.3772	10444.7	0.345
MyoD(bHLH)/Myotube-MyoD-ChIP-Seq(GSE21614)/Homer	RRCAGCTGYTSY	1e-20	-47.68	0	2427	0.1239	3113.1	0.1028
Unknown(Homeobox)/Limb-p300-ChIP-Seq/Homer	SSCMATWAAA	1e-20	-47.43	0	3786	0.1933	5076.8	0.1677
ETS(ETS)/Promoter/Homer	AACCGGAAGT	1e-20	-47.23	0	903	0.0461	1010.5	0.0334
Lhx2(Homeobox)/HFSC-Lhx2-ChIP-Seq(GSE48068)/Homer	TAATTAGN	1e-20	-46.66	0	6086	0.3107	8490.2	0.2804
STAT6(Stat)/CD4-Stat6-ChIP-Seq(GSE22104)/Homer	ABTTCYYRRGAA	1e-20	-46.62	0	3226	0.1647	4268.4	0.141
bZIP18(bZIP)/colamp-bZIP18-DAP-Seq(GSE60143)/Homer	KGMCAGCTND	1e-20	-46.59	0	14553	0.7429	21590.2	0.713
WRKY50(WRKY)/col-WRKY50-DAP-Seq(GSE60143)/Homer	NNTTGACTWNNGNNN	1e-20	-46.36	0	4258	0.2174	5777.2	0.1908
GAGA-repeat/Arabidopsis-Promoters/Homer	CTCTCTCTCY	1e-20	-46.36	0	4330	0.221	5883.2	0.1943
At5g66730(C2H2)/colamp-At5g66730-DAP-Seq(GSE60143)/Homer	TTTGTCKTTTTK	1e-20	-46.32	0	1623	0.0828	1991.5	0.0658
NF1(CTF)/LNCAP-NF1-ChIP-Seq(Unpublished)/Homer	CYTGGCABNSTGCCAR	1e-20	-46.32	0	1245	0.0636	1472.7	0.0486
Tgif1(Homeobox)/mES-Tgif1-ChIP-Seq(GSE55404)/Homer	YTGWCADY	1e-19	-45.25	0	11508	0.5874	16802.5	0.5549
SUT1?/SacCer-Promoters/Homer	CCCCGCGC	1e-19	-44.55	0	10702	0.5463	15557.6	0.5138
MYB70(MYB)/col-MYB70-DAP-Seq(GSE60143)/Homer	WTAACNGTTA	1e-19	-44.53	0	7507	0.3832	10656.4	0.3519
TRPS1(Zf)/MCF7-TRPS1-ChIP-Seq(GSE107013)/Homer	AGATAAGANN	1e-19	-44.39	0	9486	0.4842	13681.7	0.4519
GATA15(C2C2gata)/col-GATA15-DAP-Seq(GSE60143)/Homer	KATGATCA	1e-19	-44.37	0	5608	0.2863	7798.3	0.2576
TCX2(CPP)/colamp-TCX2-DAP-Seq(GSE60143)/Homer	NNWWTTYRAAHN	1e-19	-44.27	0	8964	0.4576	12881.2	0.4254
MYB77(MYB)/col-MYB77-DAP-Seq(GSE60143)/Homer	NYAACBGYMC	1e-19	-44.2	0	5035	0.257	6946.3	0.2294
MafA(bZIP)/Islet-MafA-ChIP-Seq(GSE30298)/Homer	TGCTGACTCA	1e-19	-44.06	0	2860	0.146	3759.8	0.1242
Lhx3(Homeobox)/Neuron-Lhx3-ChIP-Seq(GSE31456)/Homer	ADBTAATTAR	1e-19	-43.79	0	8852	0.4519	12715.7	0.42
Rfx6(HTH)/Min6b1-Rfx6.HA-ChIP-Seq(GSE62844)/Homer	TGTTKCCTAGCAACM	1e-18	-43.59	0	3496	0.1785	4685	0.1547
bZIP50(bZIP)/colamp-bZIP50-DAP-Seq(GSE60143)/Homer	GATGACGTCA	1e-18	-43.5	0	2999	0.1531	3964.9	0.1309
EIL4(EIL)/Tomato-EIL4-ChIP-Seq(GSE116581)/Homer	GATTCAWTGAAT	1e-18	-43.37	0	683	0.0349	737.4	0.0244
SOL1(CPP)/colamp-SOL1-DAP-Seq(GSE60143)/Homer	ATTTAAATHN	1e-18	-43.11	0	8918	0.4552	12824.7	0.4236
RAV1(RAV)/colamp-RAV1-DAP-Seq(GSE60143)/Homer	TWWTTTCTGTTG	1e-18	-42.95	0	4296	0.2193	5864.4	0.1937
E-box/Drosophila-Promoters/Homer	AACAGCTGTTHN	1e-18	-42.95	0	1065	0.0544	1244.6	0.0411
VND1(NAC)/col-VND1-DAP-Seq(GSE60143)/Homer	CTTRWDNHWYAAGYW	1e-18	-42.81	0	3194	0.163	4252.3	0.1404
At1g49010(MYBrelated)/col-At1g49010-DAP-Seq(GSE60143)/Homer	RGATAASNTT	1e-18	-42.77	0	8488	0.4333	12170.4	0.4019
IDD7(C2H2)/col-IDD7-DAP-Seq(GSE60143)/Homer	TTTGTCKTTTTN	1e-18	-42.73	0	2312	0.118	2983.4	0.0985
PU.1-IRF(ETS:IRF)/Bcell-PU.1-ChIP-Seq(GSE21512)/Homer	MGGAAGTGAAAC	1e-18	-42.62	0	5751	0.2936	8030	0.2652
SeqBias: TA-repeat	TATATATATA	1e-18	-42.08	0	14047	0.717	20833.4	0.6881
ABF1(bZIP)/Arabidopsis-ABF1-ChIP-Seq(GSE80564)/Homer	CACGTGGC	1e-18	-41.84	0	2127	0.1086	2726.3	0.09
RKD2(RWPRK)/colamp-RKD2-DAP-Seq(GSE60143)/Homer	GACKTTTCRDCTTCC	1e-18	-41.71	0	2945	0.1503	3900.1	0.1288
WRKY55(WRKY)/col-WRKY55-DAP-Seq(GSE60143)/Homer	NCGTTGACTT	1e-17	-41.07	0	4541	0.2318	6244.1	0.2062
WRKY33(WRKY)/col-WRKY33-DAP-Seq(GSE60143)/Homer	CGTTGACYAW	1e-17	-40.99	0	3099	0.1582	4129.4	0.1364
SND3(NAC)/col-SND3-DAP-Seq(GSE60143)/Homer	CTTNHNNNDNAAGNH	1e-17	-40.9	0	2780	0.1419	3668.2	0.1211
dof24(C2C2dof)/col-dof24-DAP-Seq(GSE60143)/Homer	TWMCTTTTTG	1e-17	-40.69	0	10036	0.5123	14573.2	0.4813
AT5G25475(ABI3VP1)/col-AT5G25475-DAP-Seq(GSE60143)/Homer	RNNRNCAAGCADNDB	1e-17	-40.28	0	4730	0.2414	6532.8	0.2158
TRP2(MYBrelated)/colamp-TRP2-DAP-Seq(GSE60143)/Homer	TAAACCCT	1e-17	-40.27	0	860	0.0439	981.1	0.0324
REM19(REM)/colamp-REM19-DAP-Seq(GSE60143)/Homer	AAAAAAAA	1e-17	-40.25	0	4518	0.2306	6218.6	0.2054
BIM1(bHLH)/colamp-BIM1-DAP-Seq(GSE60143)/Homer	NNNNNNVTCACGTGM	1e-17	-40.16	0	287	0.0147	255.8	0.0084
AT5G66940(C2C2dof)/col-AT5G66940-DAP-Seq(GSE60143)/Homer	NNHACTTTWT	1e-17	-39.83	0	10827	0.5527	15808.8	0.5221
Hoxc9(Homeobox)/Ainv15-Hoxc9-ChIP-Seq(GSE21812)/Homer	GGCCATAAATCA	1e-17	-39.8	0	2964	0.1513	3943.6	0.1302
Tlx?(NR)/NPC-H3K4me1-ChIP-Seq(GSE16256)/Homer	CTGGCAGSCTGCCA	1e-17	-39.78	0	1321	0.0674	1610	0.0532
WRKY28(WRKY)/col-WRKY28-DAP-Seq(GSE60143)/Homer	BGTTGACTWH	1e-17	-39.73	0	5259	0.2685	7325.3	0.2419
WRKY29(WRKY)/colamp-WRKY29-DAP-Seq(GSE60143)/Homer	MGTTGACTTT	1e-17	-39.64	0	4366	0.2229	5999.1	0.1981
GATA14(C2C2gata)/col-GATA14-DAP-Seq(GSE60143)/Homer	AYCAGATCTG	1e-17	-39.49	0	2372	0.1211	3092.8	0.1021
GRF9(GRF)/colamp-GRF9-DAP-Seq(GSE60143)/Homer	NWCTGACANNNNNNN	1e-17	-39.44	0	4064	0.2075	5555.3	0.1835
GRE(NR),IR3/A549-GR-ChIP-Seq(GSE32465)/Homer	NRGVACABNVTGTYCY	1e-17	-39.28	0	561	0.0286	594.3	0.0196
ANAC028(NAC)/col-ANAC028-DAP-Seq(GSE60143)/Homer	WRCTTGNNNNNCAAG	1e-17	-39.26	0	2672	0.1364	3526	0.1165
bcd(Homeobox)/Embryo-Bcd-ChIP-Seq(GSE86966)/Homer	VNNGGATTADNN	1e-17	-39.2	0	5036	0.2571	6998.2	0.2311
LBD18(LOBAS2)/colamp-LBD18-DAP-Seq(GSE60143)/Homer	CKGAWWTTCHGS	1e-17	-39.2	0	9683	0.4943	14047.3	0.4639
TGA2(bZIP)/colamp-TGA2-DAP-Seq(GSE60143)/Homer	ACGTCAYCHH	1e-17	-39.2	0	1399	0.0714	1720.1	0.0568
IDD5(C2H2)/colamp-IDD5-DAP-Seq(GSE60143)/Homer	TTTTGTCTTTTTBTK	1e-17	-39.15	0	4381	0.2236	6026.3	0.199
WRKY75(WRKY)/col-WRKY75-DAP-Seq(GSE60143)/Homer	CGTTGACTWW	1e-16	-38.8	0	3867	0.1974	5271.1	0.1741
TGA9(bZIP)/colamp-TGA9-DAP-Seq(GSE60143)/Homer	VTGACGTC	1e-16	-38.71	0	4301	0.2196	5912.8	0.1953
AREB3(bZIP)/col-AREB3-DAP-Seq(GSE60143)/Homer	NKGMCACGTGDCMNN	1e-16	-38.41	0	719	0.0367	802.9	0.0265
DMRT1(DM)/Testis-DMRT1-ChIP-Seq(GSE64892)/Homer	TWGHWACAWTGTWDC	1e-16	-38.3	0	1409	0.0719	1739.7	0.0575
GATA20(C2C2gata)/colamp-GATA20-DAP-Seq(GSE60143)/Homer	TNGATCNDNM	1e-16	-38.14	0	7439	0.3797	10627.3	0.351
At1g25550(G2like)/colamp-At1g25550-DAP-Seq(GSE60143)/Homer	NAGATTCY	1e-16	-38.04	0	5800	0.2961	8153.2	0.2693
NTM1(NAC)/col-NTM1-DAP-Seq(GSE60143)/Homer	ACTTRTARAASAAGT	1e-16	-37.7	0	2151	0.1098	2789	0.0921
RIN(MADS)/Tomato-RIN-ChIP-Seq(GSE116581)/Homer	CYAAAAWWGG	1e-16	-37.54	0	6570	0.3354	9319	0.3078
Egr2(Zf)/Thymocytes-Egr2-ChIP-Seq(GSE34254)/Homer	NGCGTGGGCGGR	1e-16	-37.45	0	331	0.0169	313.4	0.0104
WRKY25(WRKY)/colamp-WRKY25-DAP-Seq(GSE60143)/Homer	NNNNHRGTCAAMNNN	1e-16	-37.42	0	4639	0.2368	6426.7	0.2123
Pho4(bHLH)/Yeast-Pho4-ChIP-Seq(GSE29506)/Homer	AAGCACGTGBGD	1e-16	-37.41	0	521	0.0266	549.3	0.0181
bZIP53(bZIP)/colamp-bZIP53-DAP-Seq(GSE60143)/Homer	NDNHSACGTGKMNNN	1e-16	-37.41	0	763	0.0389	864.7	0.0286
Foxh1(Forkhead)/hESC-FOXH1-ChIP-Seq(GSE29422)/Homer	NNTGTGGATTSS	1e-16	-37.29	0	3061	0.1563	4105.8	0.1356
Foxa3(Forkhead)/Liver-Foxa3-ChIP-Seq(GSE77670)/Homer	BSNTGTTTACWYWGN	1e-16	-37.18	0	1882	0.0961	2410.7	0.0796
WRKY24(WRKY)/colamp-WRKY24-DAP-Seq(GSE60143)/Homer	CGTTGACTWW	1e-16	-37.17	0	3439	0.1755	4658.7	0.1539
ZNF416(Zf)/HEK293-ZNF416.GFP-ChIP-Seq(GSE58341)/Homer	WDNCTGGGCA	1e-16	-37.16	0	4137	0.2112	5685.1	0.1878
VND3(NAC)/colamp-VND3-DAP-Seq(GSE60143)/Homer	TRCTTGWDNHWCAAG	1e-16	-36.98	0	2649	0.1352	3510.8	0.1159
bZIP48(bZIP)/colamp-bZIP48-DAP-Seq(GSE60143)/Homer	DDWWKVTSACGTGGC	1e-15	-36.83	0	1001	0.0511	1186.9	0.0392
ERF13(AP2EREBP)/colamp-ERF13-DAP-Seq(GSE60143)/Homer	TYAGCCGCCATT	1e-15	-36.56	0	1666	0.085	2109.4	0.0697
DMRT6(DM)/Testis-DMRT6-ChIP-Seq(GSE60440)/Homer	YDGHTACAWTGTADC	1e-15	-36.52	0	1066	0.0544	1277	0.0422
AT1G76870(Trihelix)/col-AT1G76870-DAP-Seq(GSE60143)/Homer	AAAACCRGWW	1e-15	-36.4	0	1874	0.0957	2404.6	0.0794
Atf7(bZIP)/3T3L1-Atf7-ChIP-Seq(GSE56872)/Homer	NGRTGACGTCAY	1e-15	-36.31	0	1613	0.0823	2036.9	0.0673
TATA-box/SacCer-Promoters/Homer	BBHWTATATA	1e-15	-36.02	0	3124	0.1595	4208.4	0.139
NAC2(NAC)/colamp-NAC2-DAP-Seq(GSE60143)/Homer	TDCTTGNNNNNCAAG	1e-15	-35.85	0	2597	0.1326	3444.7	0.1138
CRC(C2C2YABBY)/col-CRC-DAP-Seq(GSE60143)/Homer	TWATSATA	1e-15	-35.78	0	7111	0.363	10158.4	0.3355
At3g45610(C2C2dof)/col-At3g45610-DAP-Seq(GSE60143)/Homer	TWACTTTTTS	1e-15	-35.61	0	8982	0.4585	13015.5	0.4299
GBF5(bZIP)/colamp-GBF5-DAP-Seq(GSE60143)/Homer	WKNWSACGTGGCAWN	1e-15	-35.29	0	907	0.0463	1066.9	0.0352
ANAC096(NAC)/colamp-ANAC096-DAP-Seq(GSE60143)/Homer	TACTTGWNNNWCAAG	1e-15	-35.21	0	2603	0.1329	3458.7	0.1142
WRKY6(WRKY)/colamp-WRKY6-DAP-Seq(GSE60143)/Homer	NCGTTGACTWWD	1e-15	-34.91	0	3535	0.1804	4820.4	0.1592
Tgif2(Homeobox)/mES-Tgif2-ChIP-Seq(GSE55404)/Homer	TGTCANYT	1e-15	-34.68	0	11842	0.6045	17454.8	0.5765
At1g64620(C2C2dof)/colamp-At1g64620-DAP-Seq(GSE60143)/Homer	CACTTTTT	1e-15	-34.6	0	8333	0.4254	12034.2	0.3974
ZNF467(Zf)/HEK293-ZNF467.GFP-ChIP-Seq(GSE58341)/Homer	TGGGGAAGGGCM	1e-14	-34.34	0	2165	0.1105	2834	0.0936
SF1(NR)/H295R-Nr5a1-ChIP-Seq(GSE44220)/Homer	CAAGGHCANV	1e-14	-34.26	0	1477	0.0754	1858.7	0.0614
ABI5(bZIP)/col-ABI5-DAP-Seq(GSE60143)/Homer	GCCACGTG	1e-14	-33.72	0	849	0.0433	995.7	0.0329
bZIP68(bZIP)/col-bZIP68-DAP-Seq(GSE60143)/Homer	WGCCACGTGK	1e-14	-33.7	0	779	0.0398	902	0.0298
AT2G20110(CPP)/colamp-AT2G20110-DAP-Seq(GSE60143)/Homer	ATTYAAATHY	1e-14	-33.18	0	8473	0.4325	12267	0.4051
STAT5(Stat)/mCD4+-Stat5-ChIP-Seq(GSE12346)/Homer	RTTTCTNAGAAA	1e-14	-33.04	0	1910	0.0975	2479.8	0.0819
WRKY71(WRKY)/col-WRKY71-DAP-Seq(GSE60143)/Homer	CKTTGACYWW	1e-14	-32.49	0	3160	0.1613	4293.7	0.1418
ATY13(MYB)/col-ATY13-DAP-Seq(GSE60143)/Homer	YYYAACYRHH	1e-14	-32.38	0	11117	0.5675	16356.8	0.5402
TEAD2(TEA)/Py2T-Tead2-ChIP-Seq(GSE55709)/Homer	CCWGGAATGY	1e-14	-32.37	0	2269	0.1158	2999.1	0.0991
Atf2(bZIP)/3T3L1-Atf2-ChIP-Seq(GSE56872)/Homer	NRRTGACGTCAT	1e-14	-32.28	0	1079	0.0551	1316.3	0.0435
LIN-39(Homeobox)/cElegans.L3-LIN39-ChIP-Seq(modEncode)/Homer	ATGATTRATG	1e-13	-32.15	0	6939	0.3542	9943.7	0.3284
At2g33710(AP2EREBP)/colamp-At2g33710-DAP-Seq(GSE60143)/Homer	WTKGCGGCKR	1e-13	-32.11	0	2305	0.1177	3053.6	0.1009
TGA6(bZIP)/colamp-TGA6-DAP-Seq(GSE60143)/Homer	TGACGTCABC	1e-13	-31.96	0	1597	0.0815	2042	0.0674
PPARa(NR),DR1/Liver-Ppara-ChIP-Seq(GSE47954)/Homer	VNAGGKCAAAGGTCA	1e-13	-31.95	0	3712	0.1895	5110.8	0.1688
ZNF189(Zf)/HEK293-ZNF189.GFP-ChIP-Seq(GSE58341)/Homer	TGGAACAGMA	1e-13	-31.92	0	3103	0.1584	4215.9	0.1392
TCFL2(HMG)/K562-TCF7L2-ChIP-Seq(GSE29196)/Homer	ACWTCAAAGG	1e-13	-31.62	0	495	0.0253	535.4	0.0177
ABF2(bZIP)/col-ABF2-DAP-Seq(GSE60143)/Homer	KGMCACGTGDCMHHH	1e-13	-31.58	0	491	0.0251	530.2	0.0175
At2g41835(C2H2)/col-At2g41835-DAP-Seq(GSE60143)/Homer	TTTGAAAA	1e-13	-31.55	0	3579	0.1827	4918.1	0.1624
Atf3(bZIP)/GBM-ATF3-ChIP-Seq(GSE33912)/Homer	DATGASTCATHN	1e-13	-31.25	0	2825	0.1442	3815.2	0.126
ATHB33(ZFHD)/col-ATHB33-DAP-Seq(GSE60143)/Homer	NGTRATTAAK	1e-13	-31.08	0	7178	0.3664	10320.4	0.3408
Barx1(Homeobox)/Stomach-Barx1.3xFlag-ChIP-Seq(GSE69483)/Homer	AAACMATTAN	1e-13	-31.04	0	3158	0.1612	4304.7	0.1422
PAX3:FKHR-fusion(Paired,Homeobox)/Rh4-PAX3:FKHR-ChIP-Seq(GSE19063)/Homer	ACCRTGACTAATTNN	1e-13	-30.98	0	1177	0.0601	1459.5	0.0482
ANAC005(NAC)/col-ANAC005-DAP-Seq(GSE60143)/Homer	WVCTTVTWNHABAAG	1e-13	-30.7	0	2337	0.1193	3111.1	0.1027
HNF4a(NR),DR1/HepG2-HNF4a-ChIP-Seq(GSE25021)/Homer	CARRGKBCAAAGTYCA	1e-13	-30.67	0	1740	0.0888	2255	0.0745
Pit1+1bp(Homeobox)/GCrat-Pit1-ChIP-Seq(GSE58009)/Homer	ATGCATAATTCA	1e-13	-30.65	0	2521	0.1287	3378.5	0.1116
Lhx1(Homeobox)/EmbryoCarcinoma-Lhx1-ChIP-Seq(GSE70957)/Homer	NNYTAATTAR	1e-13	-30.64	0	6528	0.3332	9340.6	0.3085
WRKY20(WRKY)/col-WRKY20-DAP-Seq(GSE60143)/Homer	CKTTGACYWD	1e-13	-30.44	0	3038	0.1551	4134.8	0.1366
AT5G23930(mTERF)/col-AT5G23930-DAP-Seq(GSE60143)/Homer	GGCGGCTG	1e-13	-30.06	0	2659	0.1357	3584.5	0.1184
TGA1(bZIP)/colamp-TGA1-DAP-Seq(GSE60143)/Homer	TGACGTCAKC	1e-12	-29.78	0	1202	0.0614	1501.6	0.0496
HLH-1(bHLH)/cElegans-Embryo-HLH1-ChIP-Seq(modEncode)/Homer	RACAGCTGTTBH	1e-12	-29.76	0	3163	0.1615	4324.2	0.1428
AT5G61620(MYBrelated)/colamp-AT5G61620-DAP-Seq(GSE60143)/Homer	CTTATCCA	1e-12	-29.63	0	6463	0.3299	9255.5	0.3057
Sp2(Zf)/HEK293-Sp2.eGFP-ChIP-Seq(Encode)/Homer	YGGCCCCGCCCC	1e-12	-29.62	0	2670	0.1363	3604.9	0.1191
c-Jun-CRE(bZIP)/K562-cJun-ChIP-Seq(GSE31477)/Homer	ATGACGTCATCY	1e-12	-29.4	0	1050	0.0536	1292.1	0.0427
WRKY15(WRKY)/col-WRKY15-DAP-Seq(GSE60143)/Homer	VGTTGACTWW	1e-12	-29.31	0	3916	0.1999	5440.7	0.1797
ANAC057(NAC)/colamp-ANAC057-DAP-Seq(GSE60143)/Homer	DVCKTGNNNNNCAMG	1e-12	-29.05	0	2474	0.1263	3324	0.1098
TAGL1(MADS)/Tomato-TAGL1-ChIP-Seq(GSE116581)/Homer	CCAAAAATRG	1e-12	-29.01	0	5966	0.3045	8512.9	0.2812
Stat3+il21(Stat)/CD4-Stat3-ChIP-Seq(GSE19198)/Homer	SVYTTCCNGGAARB	1e-12	-28.93	0	2914	0.1487	3967.7	0.131
GBF6(bZIP)/colamp-GBF6-DAP-Seq(GSE60143)/Homer	WWTGMCACGTCABCW	1e-12	-28.85	0	531	0.0271	592.7	0.0196
Atf1(bZIP)/K562-ATF1-ChIP-Seq(GSE31477)/Homer	GATGACGTCA	1e-12	-28.78	0	2473	0.1262	3325.7	0.1098
GBF3(bZIP)/Arabidopsis-GBF3-ChIP-Seq(GSE80564)/Homer	TGCCACGTSAYC	1e-12	-28.7	0	1332	0.068	1690.6	0.0558
Nkx2.2(Homeobox)/NPC-Nkx2.2-ChIP-Seq(GSE61673)/Homer	BTBRAGTGSN	1e-12	-28.58	0	6808	0.3475	9792.8	0.3234
NAP(NAC)/col-NAP-DAP-Seq(GSE60143)/Homer	ARGTTACGTRTN	1e-12	-28.38	0	2270	0.1159	3034.7	0.1002
NF1-halfsite(CTF)/LNCaP-NF1-ChIP-Seq(Unpublished)/Homer	YTGCCAAG	1e-12	-28.34	0	6080	0.3104	8693	0.2871
bZIP16(bZIP)/colamp-bZIP16-DAP-Seq(GSE60143)/Homer	TGCCACGTGD	1e-12	-28.14	0	621	0.0317	714.6	0.0236
Tal1	CATCTG	1e-12	-28.01	0	5397	0.2755	7668.2	0.2533
MYB105(MYB)/colamp-MYB105-DAP-Seq(GSE60143)/Homer	RATWCCGTTA	1e-12	-27.98	0	3146	0.1606	4317.6	0.1426
Otx2(Homeobox)/EpiLC-Otx2-ChIP-Seq(GSE56098)/Homer	NYTAATCCYB	1e-12	-27.9	0	3603	0.1839	4992.1	0.1649
ANAC016(NAC)/col-ANAC016-DAP-Seq(GSE60143)/Homer	WNCTTGNNNNNCAMG	1e-12	-27.73	0	2616	0.1335	3543.6	0.117
ATHB13(Homeobox)/col-ATHB13-DAP-Seq(GSE60143)/Homer	CAATAATT	1e-12	-27.63	0	7106	0.3627	10258.1	0.3388
CDF3(C2C2dof)/colamp-CDF3-DAP-Seq(GSE60143)/Homer	AAAAGTRM	1e-11	-27.62	0	9307	0.4751	13626.6	0.45
RLR1?/SacCer-Promoters/Homer	WTTTTCYYTTTT	1e-11	-27.43	0	4078	0.2082	5702.4	0.1883
AT1G72740(MYBrelated)/colamp-AT1G72740-DAP-Seq(GSE60143)/Homer	NNWWAMCCTAAHWNN	1e-11	-27.21	0	4519	0.2307	6362.2	0.2101
EBF(EBF)/proBcell-EBF-ChIP-Seq(GSE21978)/Homer	DGTCCCYRGGGA	1e-11	-26.81	0	642	0.0328	748.7	0.0247
AT3G25990(Trihelix)/colamp-AT3G25990-DAP-Seq(GSE60143)/Homer	TTAACCATAG	1e-11	-26.71	0	3377	0.1724	4671.7	0.1543
ATHB7(Homeobox)/col-ATHB7-DAP-Seq(GSE60143)/Homer	AATGATTG	1e-11	-26.62	0	4173	0.213	5853.4	0.1933
ANAC004(NAC)/colamp-ANAC004-DAP-Seq(GSE60143)/Homer	WNCTTVYNNNRBAAG	1e-11	-26.59	0	1537	0.0785	1995.4	0.0659
Znf263(Zf)/K562-Znf263-ChIP-Seq(GSE31477)/Homer	CVGTSCTCCC	1e-11	-26.56	0	4769	0.2434	6744	0.2227
Tcf21(bHLH)/ArterySmoothMuscle-Tcf21-ChIP-Seq(GSE61369)/Homer	NAACAGCTGG	1e-11	-26.47	0	3087	0.1576	4246.7	0.1403
MGP(C2H2)/colamp-MGP-DAP-Seq(GSE60143)/Homer	TTTTGTCGTTTW	1e-11	-26.35	0	1347	0.0688	1727.7	0.0571
JGL(C2H2)/col-JGL-DAP-Seq(GSE60143)/Homer	ACYTTCAGTT	1e-11	-26.3	0	7526	0.3842	10917	0.3606
VND4(NAC)/colamp-VND4-DAP-Seq(GSE60143)/Homer	WRCTTGWANWWCAAG	1e-11	-26.26	0	2594	0.1324	3525.2	0.1164
SEP3(MADS)/Arabidoposis-Flower-Sep3-ChIP-Seq/Homer	CCAAAAAGGG	1e-11	-26.2	0	6099	0.3113	8751.9	0.289
Fra1(bZIP)/BT549-Fra1-ChIP-Seq(GSE46166)/Homer	NNATGASTCATH	1e-11	-25.85	0	2407	0.1229	3256.3	0.1075
Nr5a2(NR)/Pancreas-LRH1-ChIP-Seq(GSE34295)/Homer	BTCAAGGTCA	1e-11	-25.8	0	2305	0.1177	3108.2	0.1027
TBP3(MYBrelated)/col-TBP3-DAP-Seq(GSE60143)/Homer	VYTAGGGCAN	1e-11	-25.76	0	3031	0.1547	4172	0.1378
At3g04030(G2like)/col-At3g04030-DAP-Seq(GSE60143)/Homer	DRGAATCT	1e-11	-25.67	0	5233	0.2671	7452.4	0.2461
WRKY40(WRKY)/colamp-WRKY40-DAP-Seq(GSE60143)/Homer	AHWAGTCAAC	1e-11	-25.65	0	2429	0.124	3290.8	0.1087
NAM(NAC)/col-NAM-DAP-Seq(GSE60143)/Homer	RGTTRCGTRW	1e-11	-25.53	0	2483	0.1267	3370.8	0.1113
BATF(bZIP)/Th17-BATF-ChIP-Seq(GSE39756)/Homer	DATGASTCAT	1e-11	-25.38	0	2786	0.1422	3815.6	0.126
bZIP28(bZIP)/col-bZIP28-DAP-Seq(GSE60143)/Homer	TGCCACGTSABH	1e-10	-25.31	0	593	0.0303	689.6	0.0228
TGA5(bZIP)/col-TGA5-DAP-Seq(GSE60143)/Homer	NNGATGACGTCATCN	1e-10	-25.27	0	271	0.0138	271.8	0.009
MYB113(MYB)/col-MYB113-DAP-Seq(GSE60143)/Homer	HNDAWTCMGTTAYWN	1e-10	-25.22	0	3265	0.1667	4522.4	0.1494
TATA-box/Drosophila-Promoters/Homer	CTATAAAAGCSV	1e-10	-25.16	0	466	0.0238	521.3	0.0172
Myf5(bHLH)/GM-Myf5-ChIP-Seq(GSE24852)/Homer	BAACAGCTGT	1e-10	-25.11	0	2260	0.1154	3049.9	0.1007
Olig2(bHLH)/Neuron-Olig2-ChIP-Seq(GSE30882)/Homer	RCCATMTGTT	1e-10	-24.99	0	7168	0.3659	10391.5	0.3432
Oct6(POU,Homeobox)/NPC-Pou3f1-ChIP-Seq(GSE35496)/Homer	WATGCAAATGAG	1e-10	-24.48	0	2400	0.1225	3259.2	0.1076
GSC(Homeobox)/FrogEmbryos-GSC-ChIP-Seq(DRA000576)/Homer	RGGATTAR	1e-10	-24.4	0	5420	0.2767	7751.2	0.256
TGA10(bZIP)/colamp-TGA10-DAP-Seq(GSE60143)/Homer	ATGACGTC	1e-10	-24.19	0	1962	0.1002	2626	0.0867
AP-1(bZIP)/ThioMac-PU.1-ChIP-Seq(GSE21512)/Homer	VTGACTCATC	1e-10	-24.18	0	3037	0.155	4197.6	0.1386
Unknown2/Drosophila-Promoters/Homer	CATCMCTA	1e-10	-24.18	0	4189	0.2138	5907.6	0.1951
GT3a(Trihelix)/col-GT3a-DAP-Seq(GSE60143)/Homer	WNACACGTGTYWWAW	1e-10	-24.17	0	735	0.0375	887.6	0.0293
AT5G56840(MYBrelated)/colamp-AT5G56840-DAP-Seq(GSE60143)/Homer	TGGATAAGGT	1e-10	-24.11	0	6113	0.312	8802.9	0.2907
Pdx1(Homeobox)/Islet-Pdx1-ChIP-Seq(SRA008281)/Homer	YCATYAATCA	1e-10	-24.02	0	5224	0.2667	7461.1	0.2464
DAG2(C2C2dof)/col-DAG2-DAP-Seq(GSE60143)/Homer	WWTTHACTTTTT	1e-10	-23.5	0	9895	0.5051	14597.3	0.4821
GLIS3(Zf)/Thyroid-Glis3.GFP-ChIP-Seq(GSE103297)/Homer	CTCCCTGGGAGGCCN	1e-10	-23.42	0	3099	0.1582	4297.2	0.1419
ERF8(AP2EREBP)/colamp-ERF8-DAP-Seq(GSE60143)/Homer	CGCCGYCATW	1e-10	-23.18	0	935	0.0477	1169.7	0.0386
Gfi1b(Zf)/HPC7-Gfi1b-ChIP-Seq(GSE22178)/Homer	MAATCACTGC	1e-10	-23.08	0	2728	0.1393	3754.1	0.124
Six2(Homeobox)/NephronProgenitor-Six2-ChIP-Seq(GSE39837)/Homer	GWAAYHTGAKMC	1e-10	-23.04	0	4522	0.2308	6420.1	0.212
ANAC083(NAC)/col-ANAC083-DAP-Seq(GSE60143)/Homer	CKTRWNNNWYAMGTA	1e-09	-23.02	0	2767	0.1412	3812.9	0.1259
ANAC011(NAC)/col-ANAC011-DAP-Seq(GSE60143)/Homer	TDCTTGYRNNDCAAG	1e-09	-22.96	0	1416	0.0723	1850.7	0.0611
X-box(HTH)/NPC-H3K4me1-ChIP-Seq(GSE16256)/Homer	GGTTGCCATGGCAA	1e-09	-22.81	0	446	0.0228	504.4	0.0167
WRKY31(WRKY)/colamp-WRKY31-DAP-Seq(GSE60143)/Homer	NCGTTGACTWWK	1e-09	-22.72	0	2847	0.1453	3933.7	0.1299
ERF115(AP2EREBP)/colamp-ERF115-DAP-Seq(GSE60143)/Homer	WTKRCGGCGB	1e-09	-22.58	0	1327	0.0677	1726.7	0.057
ATHB6(Homeobox)/Arabidopsis-HB6-ChIP-Seq(GSE80564)/Homer	CAATNATTBN	1e-09	-22.56	0	4671	0.2384	6650.5	0.2196
WRKY22(WRKY)/colamp-WRKY22-DAP-Seq(GSE60143)/Homer	WWAAAGTCAACK	1e-09	-22.51	0	2713	0.1385	3738.2	0.1235
PBX2(Homeobox)/K562-PBX2-ChIP-Seq(Encode)/Homer	RTGATTKATRGN	1e-09	-22.2	0	4395	0.2243	6241.9	0.2061
Dlx3(Homeobox)/Kerainocytes-Dlx3-ChIP-Seq(GSE89884)/Homer	NDGTAATTAC	1e-09	-22.18	0	4175	0.2131	5912.4	0.1953
EIN3(EIL)/col-EIN3-DAP-Seq(GSE60143)/Homer	ARATTCAATGWATYT	1e-09	-21.99	0	891	0.0455	1115.9	0.0369
NeuroG2(bHLH)/Fibroblast-NeuroG2-ChIP-Seq(GSE75910)/Homer	ACCATCTGTT	1e-09	-21.91	0	5446	0.278	7826.7	0.2585
At5g08750(C3H)/col-At5g08750-DAP-Seq(GSE60143)/Homer	NWDTTGCGGCTR	1e-09	-21.83	0	896	0.0457	1123.8	0.0371
WRKY14(WRKY)/colamp-WRKY14-DAP-Seq(GSE60143)/Homer	NCGTTGACTTTN	1e-09	-21.82	0	2210	0.1128	3008.9	0.0994
AT5G63260(C3H)/col-AT5G63260-DAP-Seq(GSE60143)/Homer	RAAAAAGTRA	1e-09	-21.81	0	11750	0.5998	17502.1	0.578
CEBP:AP1(bZIP)/ThioMac-CEBPb-ChIP-Seq(GSE21512)/Homer	DRTGTTGCAA	1e-09	-21.79	0	3812	0.1946	5375.2	0.1775
SeqBias: A/T bias	WWWWWWWWWW	1e-09	-21.36	0	19412	0.9909	29857.9	0.9861
PCF/Arabidopsis-Promoters/Homer	NNWWWTGGGCYTDDN	1e-09	-21.31	0	1198	0.0612	1552.1	0.0513
Rfx2(HTH)/LoVo-RFX2-ChIP-Seq(GSE49402)/Homer	GTTGCCATGGCAACM	1e-09	-21.28	0	276	0.0141	289.7	0.0096
ANAC020(NAC)/col-ANAC020-DAP-Seq(GSE60143)/Homer	DVCKTGHNNNDCAAG	1e-09	-21.17	0	2111	0.1078	2870.9	0.0948
WRKY27(WRKY)/colamp-WRKY27-DAP-Seq(GSE60143)/Homer	NHGTTGACYTWD	1e-09	-21.16	0	3994	0.2039	5655.7	0.1868
Rfx1(HTH)/NPC-H3K4me1-ChIP-Seq(GSE16256)/Homer	KGTTGCCATGGCAA	1e-09	-21.04	0	663	0.0338	805.3	0.0266
TF3A(C2H2)/col-TF3A-DAP-Seq(GSE60143)/Homer	NNDDGAGGAGGWNNN	1e-09	-20.84	0	4770	0.2435	6823.9	0.2254
Chop(bZIP)/MEF-Chop-ChIP-Seq(GSE35681)/Homer	ATTGCATCAT	1e-09	-20.8	0	1196	0.0611	1553.8	0.0513
At5g47390(MYBrelated)/col-At5g47390-DAP-Seq(GSE60143)/Homer	CTTATCCA	1e-08	-20.66	0	5716	0.2918	8253.7	0.2726
SpiB(ETS)/OCILY3-SPIB-ChIP-Seq(GSE56857)/Homer	AAAGRGGAAGTG	1e-08	-20.64	0	1035	0.0528	1326.2	0.0438
ATHB5(HB)/colamp-ATHB5-DAP-Seq(GSE60143)/Homer	AATGATTG	1e-08	-20.57	0	5828	0.2975	8424.9	0.2782
MYNN(Zf)/HEK293-MYNN.eGFP-ChIP-Seq(Encode)/Homer	TTCAAAWTAAAAGTC	1e-08	-20.48	0	1630	0.0832	2178.7	0.072
ZNF7(Zf)/HepG2-ZNF7.Flag-ChIP-Seq(Encode)/Homer	CTGCCWVCTTTTRTA	1e-08	-20.42	0	2634	0.1345	3645.8	0.1204
FUS3(ABI3VP1)/col-FUS3-DAP-Seq(GSE60143)/Homer	DNNWTNTGCATGKNN	1e-08	-20.41	0	4014	0.2049	5695.4	0.1881
AT1G69570(C2C2dof)/col-AT1G69570-DAP-Seq(GSE60143)/Homer	WAAAAGTGHH	1e-08	-20.41	0	6961	0.3553	10148.1	0.3352
NFAT:AP1(RHD,bZIP)/Jurkat-NFATC1-ChIP-Seq(Jolma_et_al.)/Homer	SARTGGAAAAWRTGAGTCAB	1e-08	-20.33	0	1003	0.0512	1283.3	0.0424
IRF:BATF(IRF:bZIP)/pDC-Irf8-ChIP-Seq(GSE66899)/Homer	CTTTCANTATGACTV	1e-08	-20.22	0	751	0.0383	931.3	0.0308
WRKY3(WRKY)/col-WRKY3-DAP-Seq(GSE60143)/Homer	NCKTTGACYDDN	1e-08	-20.05	0	2623	0.1339	3633.8	0.12
CRE(bZIP)/Promoter/Homer	CSGTGACGTCAC	1e-08	-19.93	0	498	0.0254	586.9	0.0194
ATHB25(ZFHD)/colamp-ATHB25-DAP-Seq(GSE60143)/Homer	TAATTAVB	1e-08	-19.9	0	6395	0.3264	9295.3	0.307
MafB(bZIP)/BMM-Mafb-ChIP-Seq(GSE75722)/Homer	WNTGCTGASTCAGCANWTTY	1e-08	-19.85	0	1570	0.0801	2098	0.0693
At1g76110(ARID)/colamp-At1g76110-DAP-Seq(GSE60143)/Homer	ATTTAATG	1e-08	-19.72	0	4059	0.2072	5772.8	0.1907
Stat3(Stat)/mES-Stat3-ChIP-Seq(GSE11431)/Homer	CTTCCGGGAA	1e-08	-19.7	0	1911	0.0975	2593.5	0.0857
ZNF317(Zf)/HEK293-ZNF317.GFP-ChIP-Seq(GSE58341)/Homer	GTCWGCTGTYYCTCT	1e-08	-19.63	0	362	0.0185	406.4	0.0134
WRKY43(WRKY)/colamp-WRKY43-DAP-Seq(GSE60143)/Homer	NCGTTGACTTTT	1e-08	-19.49	0	1574	0.0803	2106.8	0.0696
LBD19(LOBAS2)/colamp-LBD19-DAP-Seq(GSE60143)/Homer	CCKGAAWTTCMGGAW	1e-08	-19.45	0	6701	0.3421	9768	0.3226
RXR(NR),DR1/3T3L1-RXR-ChIP-Seq(GSE13511)/Homer	TAGGGCAAAGGTCA	1e-08	-19.44	0	3586	0.1831	5069.8	0.1674
bHLH80(bHLH)/col-bHLH80-DAP-Seq(GSE60143)/Homer	NNNNDCAASTTGHNN	1e-08	-19.35	0	3353	0.1712	4723.9	0.156
ANAC103(NAC)/col-ANAC103-DAP-Seq(GSE60143)/Homer	AACTTGNWNWNCAAG	1e-08	-19.32	0	1403	0.0716	1861.5	0.0615
E2F3(E2F)/MEF-E2F3-ChIP-Seq(GSE71376)/Homer	BTKGGCGGGAAA	1e-08	-19.31	0	915	0.0467	1166.8	0.0385
AT3G10030(Trihelix)/colamp-AT3G10030-DAP-Seq(GSE60143)/Homer	GCCGTTAA	1e-08	-19.3	0	2201	0.1124	3021.8	0.0998
PSE(SNAPc)/K562-mStart-Seq/Homer	WAVTCACCMTAASYDAAAAG	1e-08	-19.25	0	2591	0.1323	3595.5	0.1187
GATA3(Zf)/iTreg-Gata3-ChIP-Seq(GSE20898)/Homer	AGATAASR	1e-08	-19.23	0	7163	0.3656	10476.2	0.346
Twist2(bHLH)/Myoblast-Twist2.Ty1-ChIP-Seq(GSE127998)/Homer	MCAGCTGBYH	1e-08	-19.23	0	5734	0.2927	8303.8	0.2742
AT5G47660(Trihelix)/colamp-AT5G47660-DAP-Seq(GSE60143)/Homer	AWTTTTACCG	1e-08	-19.21	0	7532	0.3845	11040.6	0.3646
ATHB40(HB)/col-ATHB40-DAP-Seq(GSE60143)/Homer	HCAATWATTG	1e-08	-19.06	0	5255	0.2682	7581.2	0.2504
Rfx5(HTH)/GM12878-Rfx5-ChIP-Seq(GSE31477)/Homer	SCCTAGCAACAG	1e-08	-19.01	0	1055	0.0539	1366.6	0.0451
Klf9(Zf)/GBM-Klf9-ChIP-Seq(GSE62211)/Homer	GCCACRCCCACY	1e-08	-18.92	0	543	0.0277	652.5	0.0216
Brn1(POU,Homeobox)/NPC-Brn1-ChIP-Seq(GSE35496)/Homer	TATGCWAATBAV	1e-08	-18.92	0	1749	0.0893	2365.6	0.0781
WRKY26(WRKY)/colamp-WRKY26-DAP-Seq(GSE60143)/Homer	CGTTGACTWDKN	1e-08	-18.6	0	2084	0.1064	2857.9	0.0944
PU.1:IRF8(ETS:IRF)/pDC-Irf8-ChIP-Seq(GSE66899)/Homer	GGAAGTGAAAST	1e-08	-18.56	0	934	0.0477	1198.1	0.0396
ZNF341(Zf)/EBV-ZNF341-ChIP-Seq(GSE113194)/Homer	GGAACAGCCG	1e-08	-18.54	0	2102	0.1073	2884.9	0.0953
Fra2(bZIP)/Striatum-Fra2-ChIP-Seq(GSE43429)/Homer	GGATGACTCATC	1e-07	-18.38	0	1908	0.0974	2602.4	0.0859
OBP4(C2C2dof)/col-OBP4-DAP-Seq(GSE60143)/Homer	WTTHACTTTTTB	1e-07	-18.17	0	8442	0.4309	12454	0.4113
COG1(C2C2dof)/col-COG1-DAP-Seq(GSE60143)/Homer	DAAAAAGTGA	1e-07	-18.05	0	8279	0.4226	12205.1	0.4031
Arnt:Ahr(bHLH)/MCF7-Arnt-ChIP-Seq(Lo_et_al.)/Homer	TBGCACGCAA	1e-07	-18	0	1630	0.0832	2201.1	0.0727
GTL1(Trihelix)/colamp-GTL1-DAP-Seq(GSE60143)/Homer	WWTTTACCKY	1e-07	-17.98	0	5965	0.3045	8674	0.2865
ANAC053(NAC)/colamp-ANAC053-DAP-Seq(GSE60143)/Homer	TDCTTGNNNNNCAAG	1e-07	-17.89	0	1834	0.0936	2499.3	0.0825
RFX(HTH)/K562-RFX3-ChIP-Seq(SRA012198)/Homer	CGGTTGCCATGGCAAC	1e-07	-17.88	0	221	0.0113	230.7	0.0076
NTM2(NAC)/col-NTM2-DAP-Seq(GSE60143)/Homer	CTTRTNNNAYAAGBH	1e-07	-17.82	0	2128	0.1086	2930.8	0.0968
SND2(NAC)/colamp-SND2-DAP-Seq(GSE60143)/Homer	CTTVWNNNWBAAGNW	1e-07	-17.79	0	1810	0.0924	2465.8	0.0814
AT4G00250(GeBP)/col-AT4G00250-DAP-Seq(GSE60143)/Homer	WDTGGATAAKRT	1e-07	-17.79	0	3003	0.1533	4223	0.1395
WRKY65(WRKY)/colamp-WRKY65-DAP-Seq(GSE60143)/Homer	AWWWAGTCAACG	1e-07	-17.7	0	2125	0.1085	2927.4	0.0967
E2F6(E2F)/Hela-E2F6-ChIP-Seq(GSE31477)/Homer	GGCGGGAARN	1e-07	-17.6	0	783	0.04	992.5	0.0328
AT2G31460(REMB3)/col-AT2G31460-DAP-Seq(GSE60143)/Homer	WNWARWDGAAATGAT	1e-07	-17.53	0	2104	0.1074	2898.5	0.0957
WRKY45(WRKY)/col-WRKY45-DAP-Seq(GSE60143)/Homer	HNNNKTTGACTWWNH	1e-07	-17.43	0	2061	0.1052	2836.5	0.0937
ANAC047(NAC)/colamp-ANAC047-DAP-Seq(GSE60143)/Homer	WACACGTAACTT	1e-07	-17.37	0	1724	0.088	2344.4	0.0774
LMI1(HB)/colamp-LMI1-DAP-Seq(GSE60143)/Homer	AATTATTG	1e-07	-17.21	0	4893	0.2498	7064.9	0.2333
WRKY42(WRKY)/colamp-WRKY42-DAP-Seq(GSE60143)/Homer	NAAAGTCAACGN	1e-07	-17.2	0	1213	0.0619	1606.8	0.0531
ANAC050(NAC)/colamp-ANAC050-DAP-Seq(GSE60143)/Homer	WNCTTGNNNNNCAAG	1e-07	-16.96	0	1867	0.0953	2557.9	0.0845
MYB119(MYB)/colamp-MYB119-DAP-Seq(GSE60143)/Homer	YRACCGTTACDD	1e-07	-16.79	0	1129	0.0576	1489.5	0.0492
ZNF675(Zf)/HEK293-ZNF675.GFP-ChIP-Seq(GSE58341)/Homer	ARGAGGMCAAAATGW	1e-07	-16.65	0	700	0.0357	882.9	0.0292
KLF6(Zf)/PDAC-KLF6-ChIP-Seq(GSE64557)/Homer	MKGGGYGTGGCC	1e-07	-16.64	0	1864	0.0952	2556.7	0.0844
ZNF136(Zf)/HEK293-ZNF136.GFP-ChIP-Seq(GSE58341)/Homer	YTKGATAHAGTATTCTWGGTNGGCA	1e-07	-16.49	0	564	0.0288	694.6	0.0229
ERF105(AP2EREBP)/colamp-ERF105-DAP-Seq(GSE60143)/Homer	TGGCGGCT	1e-07	-16.47	0	1413	0.0721	1901.5	0.0628
ZNF768(Zf)/Rajj-ZNF768-ChIP-Seq(GSE111879)/Homer	RHHCAGAGAGGB	1e-07	-16.42	0	109	0.0056	97.9	0.0032
ANAC058(NAC)/col-ANAC058-DAP-Seq(GSE60143)/Homer	TWCTTGTDNNACAAG	1e-07	-16.33	0	2011	0.1027	2775.2	0.0917
GATA11(C2C2gata)/col-GATA11-DAP-Seq(GSE60143)/Homer	DDHYYAGATCTR	1e-07	-16.22	0	1543	0.0788	2092.9	0.0691
TCF4(bHLH)/SHSY5Y-TCF4-ChIP-Seq(GSE96915)/Homer	SMCATCTGKH	1e-06	-16.02	0	5116	0.2612	7421.8	0.2451
At1g68670(G2like)/colamp-At1g68670-DAP-Seq(GSE60143)/Homer	WNWWHNRAAGATTCT	1e-06	-16.01	0	3343	0.1706	4754.1	0.157
Unknown1/Arabidopsis-Promoters/Homer	RGGGTAWWWTHGTAA	1e-06	-15.94	0	465	0.0237	561.3	0.0185
RAP26(AP2EREBP)/colamp-RAP26-DAP-Seq(GSE60143)/Homer	HDATGGCGGCGG	1e-06	-15.76	0	930	0.0475	1214	0.0401
Atf4(bZIP)/MEF-Atf4-ChIP-Seq(GSE35681)/Homer	MTGATGCAAT	1e-06	-15.72	0	1490	0.0761	2020.1	0.0667
bHLH18(bHLH)/col-bHLH18-DAP-Seq(GSE60143)/Homer	CACGTGTTYCACGTG	1e-06	-15.65	0	62	0.0032	46.7	0.0015
BHLHA15(bHLH)/NIH3T3-BHLHB8.HA-ChIP-Seq(GSE119782)/Homer	NAMCAGCTGK	1e-06	-15.62	0	4590	0.2343	6633.1	0.2191
Oct4(POU,Homeobox)/mES-Oct4-ChIP-Seq(GSE11431)/Homer	ATTTGCATAW	1e-06	-15.6	0	2659	0.1357	3741.4	0.1236
JunB(bZIP)/DendriticCells-Junb-ChIP-Seq(GSE36099)/Homer	RATGASTCAT	1e-06	-15.58	0	2257	0.1152	3146.3	0.1039
ANAC079(NAC)/colamp-ANAC079-DAP-Seq(GSE60143)/Homer	TACACGCAACCT	1e-06	-15.38	0	1361	0.0695	1836.4	0.0607
THRa(NR)/C17.2-THRa-ChIP-Seq(GSE38347)/Homer	GGTCANYTGAGGWCA	1e-06	-15.33	0	1160	0.0592	1546.2	0.0511
SeqBias: CG-repeat	CGCGCGCGCG	1e-06	-15.26	0	702	0.0358	894.2	0.0295
AT1G28160(AP2EREBP)/colamp-AT1G28160-DAP-Seq(GSE60143)/Homer	GGCGGCGG	1e-06	-15.23	0	1219	0.0622	1632.3	0.0539
NFkB-p65(RHD)/GM12787-p65-ChIP-Seq(GSE19485)/Homer	WGGGGATTTCCC	1e-06	-15.19	0	1763	0.09	2424.5	0.0801
GATA12(C2C2gata)/col-GATA12-DAP-Seq(GSE60143)/Homer	YAGATCTRAW	1e-06	-15.18	0	1985	0.1013	2750.4	0.0908
IRF3(IRF)/BMDM-Irf3-ChIP-Seq(GSE67343)/Homer	AGTTTCAKTTTC	1e-06	-15.13	0	1699	0.0867	2331.1	0.077
AT1G20910(ARID)/col-AT1G20910-DAP-Seq(GSE60143)/Homer	THAATTRAWN	1e-06	-15.07	0	8253	0.4213	12224	0.4037
ASL18(LOBAS2)/colamp-ASL18-DAP-Seq(GSE60143)/Homer	CCGGAAAWTCMGGAR	1e-06	-14.95	0	4916	0.2509	7137.2	0.2357
At5g08520(MYBrelated)/colamp-At5g08520-DAP-Seq(GSE60143)/Homer	ADBSTTATCY	1e-06	-14.84	0	4742	0.2421	6876.8	0.2271
BPC1(BBRBPC)/colamp-BPC1-DAP-Seq(GSE60143)/Homer	GARGAGAGAGAA	1e-06	-14.82	0	2971	0.1517	4216.4	0.1393
Brn2(POU,Homeobox)/NPC-Brn2-ChIP-Seq(GSE35496)/Homer	ATGAATATTC	1e-06	-14.79	0	726	0.0371	931.6	0.0308
STAT1(Stat)/HelaS3-STAT1-ChIP-Seq(GSE12782)/Homer	NATTTCCNGGAAAT	1e-06	-14.56	0	1597	0.0815	2188.9	0.0723
GATA4(C2C2gata)/col-GATA4-DAP-Seq(GSE60143)/Homer	DDWTYAGATCTR	1e-06	-14.26	0	2714	0.1385	3841.1	0.1269
ANAC013(NAC)/col-ANAC013-DAP-Seq(GSE60143)/Homer	CTTGNNNNNCAAGNA	1e-06	-14.24	0	1400	0.0715	1904.7	0.0629
WRKY47(WRKY)/colamp-WRKY47-DAP-Seq(GSE60143)/Homer	WAAGTCAACGBT	1e-06	-14.03	0	958	0.0489	1267.7	0.0419
PAX5(Paired,Homeobox)/GM12878-PAX5-ChIP-Seq(GSE32465)/Homer	GCAGCCAAGCRTGACH	1e-06	-13.96	0	991	0.0506	1315	0.0434
LBD23(LOBAS2)/colamp-LBD23-DAP-Seq(GSE60143)/Homer	GCGNAWWWTNCGCYW	1e-06	-13.94	0	1735	0.0886	2397.4	0.0792
GATA1(C2C2gata)/colamp-GATA1-DAP-Seq(GSE60143)/Homer	DDWWYYAGATCTRRW	1e-06	-13.85	0	1461	0.0746	1997.4	0.066
Tcf12(bHLH)/GM12878-Tcf12-ChIP-Seq(GSE32465)/Homer	VCAGCTGYTG	1e-06	-13.82	0	2740	0.1399	3887	0.1284
AT5G05550(Trihelix)/col-AT5G05550-DAP-Seq(GSE60143)/Homer	HDNHDTCKCCGGMGA	1e-05	-13.67	0	2961	0.1511	4218.2	0.1393
PPARE(NR),DR1/3T3L1-Pparg-ChIP-Seq(GSE13511)/Homer	TGACCTTTGCCCCA	1e-05	-13.65	0	3116	0.1591	4450.7	0.147
IDD2(C2H2)/colamp-IDD2-DAP-Seq(GSE60143)/Homer	HAVAAAAMGACAAAA	1e-05	-13.64	0	832	0.0425	1090.5	0.036
Nr5a2(NR)/mES-Nr5a2-ChIP-Seq(GSE19019)/Homer	BTCAAGGTCA	1e-05	-13.62	0	1650	0.0842	2276.4	0.0752
bHLH122(bHLH)/col100-bHLH122-DAP-Seq(GSE60143)/Homer	NDDCAASTTGHHNWW	1e-05	-13.51	0	2944	0.1503	4195.7	0.1386
Unknown1(NR/Ini-like)/Drosophila-Promoters/Homer	MYGGTCACACTG	1e-05	-13.43	0	622	0.0318	794.3	0.0262
At1g19000(MYBrelated)/colamp-At1g19000-DAP-Seq(GSE60143)/Homer	WWTGGATAADDT	1e-05	-13.25	0	4497	0.2296	6534.9	0.2158
IRF8(IRF)/BMDM-IRF8-ChIP-Seq(GSE77884)/Homer	GRAASTGAAAST	1e-05	-13.25	0	1486	0.0759	2040.2	0.0674
At5g58900(MYBrelated)/colamp-At5g58900-DAP-Seq(GSE60143)/Homer	WWWTYTTATCTWWWW	1e-05	-13.2	0	7856	0.401	11653.5	0.3849
Tbx20(T-box)/Heart-Tbx20-ChIP-Seq(GSE29636)/Homer	GGTGYTGACAGS	1e-05	-13.06	0	821	0.0419	1079.2	0.0356
At4g38000(C2C2dof)/col-At4g38000-DAP-Seq(GSE60143)/Homer	WWWTWACTTTTT	1e-05	-13.03	0	7545	0.3851	11180.2	0.3692
Srebp1a(bHLH)/HepG2-Srebp1a-ChIP-Seq(GSE31477)/Homer	RTCACSCCAY	1e-05	-12.96	0	653	0.0333	841.4	0.0278
CHR(?)/Hela-CellCycle-Expression/Homer	SRGTTTCAAA	1e-05	-12.83	0	3792	0.1936	5478.4	0.1809
ZNF652/HepG2-ZNF652.Flag-ChIP-Seq(Encode)/Homer	TTAACCCTTTVNKKN	1e-05	-12.75	0	1272	0.0649	1733.8	0.0573
LBD13(LOBAS2)/colamp-LBD13-DAP-Seq(GSE60143)/Homer	KCCGTNWTTTBCGGC	1e-05	-12.72	0	1063	0.0543	1430.1	0.0472
ANAC075(NAC)/col-ANAC075-DAP-Seq(GSE60143)/Homer	CTTSWWNWWSAAGYT	1e-05	-12.6	0	1103	0.0563	1489.5	0.0492
TGA4(bZIP)/colamp-TGA4-DAP-Seq(GSE60143)/Homer	RTGACGTCAKCW	1e-05	-12.5	0	801	0.0409	1055.4	0.0349
HAT2(Homeobox)/colamp-HAT2-DAP-Seq(GSE60143)/Homer	CYAATSATTR	1e-05	-12.45	0	4719	0.2409	6885.3	0.2274
REB1/SacCer-Promoters/Homer	KCCGGGTAAYRR	1e-05	-12.41	0	607	0.031	780.2	0.0258
ATHB21(HB)/colamp-ATHB21-DAP-Seq(GSE60143)/Homer	YCAATWAT	1e-05	-12.27	0	3006	0.1534	4307.5	0.1423
At1g74840(MYBrelated)/col100-At1g74840-DAP-Seq(GSE60143)/Homer	YHTTATCCAWWT	1e-05	-12.25	0	4077	0.2081	5918.9	0.1955
KLF5(Zf)/LoVo-KLF5-ChIP-Seq(GSE49402)/Homer	DGGGYGKGGC	1e-05	-12.18	0	2253	0.115	3185.3	0.1052
ATHB23(ZFHD)/col-ATHB23-DAP-Seq(GSE60143)/Homer	HTAATTARNN	1e-05	-11.88	0	5177	0.2643	7591.4	0.2507
p53(p53)/mES-cMyc-ChIP-Seq(GSE11431)/Homer	ACATGCCCGGGCAT	1e-05	-11.82	0	53	0.0027	42.9	0.0014
FAR1(FAR1)/col-FAR1-DAP-Seq(GSE60143)/Homer	TKNNNYYCACGCGCY	1e-05	-11.79	0	92	0.0047	88	0.0029
ABF1/SacCer-Promoters/Homer	CGTRNAAARTGA	1e-05	-11.77	0	460	0.0235	578.1	0.0191
MyoG(bHLH)/C2C12-MyoG-ChIP-Seq(GSE36024)/Homer	AACAGCTG	1e-05	-11.69	0	3125	0.1595	4495.3	0.1485
Unknown5/Drosophila-Promoters/Homer	GCTGATAASV	1e-05	-11.66	0	2371	0.121	3368.4	0.1112
THRb(NR)/HepG2-THRb.Flag-ChIP-Seq(Encode)/Homer	GGTCACCTGAGGTCA	1e-05	-11.59	0	1409	0.0719	1946	0.0643
Hand2(bHLH)/Mesoderm-Hand2-ChIP-Seq(GSE61475)/Homer	TGACANARRCCAGRC	1e-05	-11.58	0	1706	0.0871	2383.2	0.0787
Gata4(Zf)/Heart-Gata4-ChIP-Seq(GSE35151)/Homer	NBWGATAAGR	1e-05	-11.56	0	4784	0.2442	7001.5	0.2312
ERF73(AP2EREBP)/col-ERF73-DAP-Seq(GSE60143)/Homer	CCGCCGCC	0.0001	-11.5	0	352	0.018	430.8	0.0142
GT2(Trihelix)/colamp-GT2-DAP-Seq(GSE60143)/Homer	AMGGTAAAWWWN	0.0001	-11.49	0	6221	0.3176	9189.3	0.3035
Meis1(Homeobox)/MastCells-Meis1-ChIP-Seq(GSE48085)/Homer	VGCTGWCAVB	0.0001	-11.4	0	5521	0.2818	8124.8	0.2683
ANAC062(NAC)/colamp-ANAC062-DAP-Seq(GSE60143)/Homer	TACTTANTNWNYAAG	0.0001	-11.34	0	1535	0.0784	2134.7	0.0705
M1BP(Zf)/S2R+-M1BP-ChIP-Seq(GSE49842)/Homer	CAGTGTGACCGT	0.0001	-11.28	0	675	0.0345	885.5	0.0292
RAP212(AP2EREBP)/col-RAP212-DAP-Seq(GSE60143)/Homer	CGCCGCCATTTT	0.0001	-11.27	0	546	0.0279	702.7	0.0232
MafF(bZIP)/HepG2-MafF-ChIP-Seq(GSE31477)/Homer	HWWGTCAGCAWWTTT	0.0001	-11.23	0	1604	0.0819	2237.2	0.0739
ERE(NR),IR3/MCF7-ERa-ChIP-Seq(Unpublished)/Homer	VAGGTCACNSTGACC	0.0001	-11.11	0	760	0.0388	1008.2	0.0333
AARE(HLH)/mES-cMyc-ChIP-Seq/Homer	GATTGCATCA	0.0001	-11.02	0	443	0.0226	559.1	0.0185
Prop1(Homeobox)/GHFT1-PROP1.biotin-ChIP-Seq(GSE77302)/Homer	NTAATBNAATTA	0.0001	-10.88	0	4120	0.2103	6009.7	0.1985
NF1:FOXA1(CTF,Forkhead)/LNCAP-FOXA1-ChIP-Seq(GSE27824)/Homer	WNTGTTTRYTTTGGCA	0.0001	-10.86	0	305	0.0156	369.2	0.0122
JunD(bZIP)/K562-JunD-ChIP-Seq/Homer	ATGACGTCATCN	0.0001	-10.85	0	246	0.0126	289.4	0.0096
AGL6(MADS)/col-AGL6-DAP-Seq(GSE60143)/Homer	TTWCCWWAWWDGGWA	0.0001	-10.82	0	809	0.0413	1081.4	0.0357
FXR(NR),IR1/Liver-FXR-ChIP-Seq(Chong_et_al.)/Homer	AGGTCANTGACCTB	0.0001	-10.55	0	1116	0.057	1529.5	0.0505
Srebp2(bHLH)/HepG2-Srebp2-ChIP-Seq(GSE31477)/Homer	CGGTCACSCCAC	0.0001	-10.53	0	356	0.0182	441.5	0.0146
ERF104(AP2EREBP)/col-ERF104-DAP-Seq(GSE60143)/Homer	GGCGGCGG	0.0001	-10.42	0.0001	600	0.0306	786	0.026
MYB98(MYB)/col-MYB98-DAP-Seq(GSE60143)/Homer	NWDCCGTTAC	0.0001	-10.25	0.0001	982	0.0501	1337	0.0442
HSF3(HSF)/colamp-HSF3-DAP-Seq(GSE60143)/Homer	NTTCTAGAAKCTTCT	0.0001	-10.22	0.0001	4469	0.2281	6551.8	0.2164
CUC1(NAC)/col-CUC1-DAP-Seq(GSE60143)/Homer	TACTTGTNNNACAAG	0.0001	-10.21	0.0001	1327	0.0677	1842.7	0.0609
CES-1(Homeobox)/cElegans-L1-CES1-ChIP-Seq(modEncode)/Homer	AAATTSAATTTN	0.0001	-10.2	0.0001	3622	0.1849	5270.5	0.1741
CArG(MADS)/PUER-Srf-ChIP-Seq(Sullivan_et_al.)/Homer	CCATATATGGNM	0.0001	-10.07	0.0001	1334	0.0681	1854.3	0.0612
KLF3(Zf)/MEF-Klf3-ChIP-Seq(GSE44748)/Homer	NRGCCCCRCCCHBNN	0.0001	-9.661	0.0001	653	0.0333	867.8	0.0287
IRF1(IRF)/PBMC-IRF1-ChIP-Seq(GSE43036)/Homer	GAAAGTGAAAGT	0.0001	-9.629	0.0001	689	0.0352	919.6	0.0304
GATA:SCL(Zf,bHLH)/Ter119-SCL-ChIP-Seq(GSE18720)/Homer	CRGCTGBNGNSNNSAGATAA	0.0001	-9.613	0.0001	471	0.024	608.2	0.0201
Unknown4/Drosophila-Promoters/Homer	AAAAATACCRMA	0.0001	-9.516	0.0001	824	0.0421	1115.9	0.0369
ATHB34(ZFHD)/colamp-ATHB34-DAP-Seq(GSE60143)/Homer	TRATTARS	0.0001	-9.51	0.0001	4453	0.2273	6542.8	0.2161
Pax8(Paired,Homeobox)/Thyroid-Pax8-ChIP-Seq(GSE26938)/Homer	GTCATGCHTGRCTGS	0.0001	-9.467	0.0001	814	0.0416	1101.3	0.0364
ABR1(AP2EREBP)/colamp-ABR1-DAP-Seq(GSE60143)/Homer	AAATGGCGGCGG	0.0001	-9.462	0.0001	876	0.0447	1191.6	0.0394
Zfp57(Zf)/H1-ZFP57.HA-ChIP-Seq(GSE115387)/Homer	NANTGCSGCA	0.0001	-9.415	0.0001	436	0.0223	560.3	0.0185
At4g18890(BZR)/col-At4g18890-DAP-Seq(GSE60143)/Homer	NDBRCACGTGYR	0.0001	-9.379	0.0001	356	0.0182	448.2	0.0148
JKD(C2H2)/col-JKD-DAP-Seq(GSE60143)/Homer	TTTTGTCGTTTT	0.0001	-9.29	0.0002	1066	0.0544	1470.6	0.0486
HIF-1a(bHLH)/MCF7-HIF1a-ChIP-Seq(GSE28352)/Homer	TACGTGCV	0.0001	-9.227	0.0002	596	0.0304	789.4	0.0261
Six1(Homeobox)/Myoblast-Six1-ChIP-Chip(GSE20150)/Homer	GKVTCADRTTWC	0.001	-9.18	0.0002	1117	0.057	1546.5	0.0511
HIC1(Zf)/Treg-ZBTB29-ChIP-Seq(GSE99889)/Homer	TGCCAGCB	0.001	-8.861	0.0002	5760	0.294	8547.1	0.2823
AGL25(MADS)/colamp-AGL25-DAP-Seq(GSE60143)/Homer	TTTCCATWTWTGGAA	0.001	-8.812	0.0003	411	0.021	529.9	0.0175
VIP1(bZIP)/col-VIP1-DAP-Seq(GSE60143)/Homer	NTTGACAGCTGTCAN	0.001	-8.777	0.0003	651	0.0332	872.8	0.0288
KLF10(Zf)/HEK293-KLF10.GFP-ChIP-Seq(GSE58341)/Homer	GGGGGTGTGTCC	0.001	-8.733	0.0003	1146	0.0585	1594.4	0.0527
ZNF264(Zf)/HEK293-ZNF264.GFP-ChIP-Seq(GSE58341)/Homer	RGGGCACTAACY	0.001	-8.723	0.0003	2003	0.1022	2865.8	0.0946
Brachyury(T-box)/Mesoendoderm-Brachyury-ChIP-exo(GSE54963)/Homer	ANTTMRCASBNNNGTGYKAAN	0.001	-8.714	0.0003	1137	0.058	1581.3	0.0522
ZNF322(Zf)/HEK293-ZNF322.GFP-ChIP-Seq(GSE58341)/Homer	GAGCCTGGTACTGWGCCTGR	0.001	-8.711	0.0003	679	0.0347	913.8	0.0302
ANL2(HB)/col-ANL2-DAP-Seq(GSE60143)/Homer	CATTAATTGC	0.001	-8.638	0.0003	3345	0.1708	4883.7	0.1613
At5g08330(TCP)/col-At5g08330-DAP-Seq(GSE60143)/Homer	GGRCCCAC	0.001	-8.609	0.0003	1343	0.0686	1886.2	0.0623
OCT:OCT(POU,Homeobox)/NPC-Brn1-ChIP-Seq(GSE35496)/Homer	ATGAATATTCATGAG	0.001	-8.605	0.0003	65	0.0033	62.6	0.0021
ANAC092(NAC)/colamp-ANAC092-DAP-Seq(GSE60143)/Homer	WRCKTGWNNNWCAMG	0.001	-8.594	0.0003	1227	0.0626	1715.4	0.0567
VDR(NR),DR3/GM10855-VDR+vitD-ChIP-Seq(GSE22484)/Homer	ARAGGTCANWGAGTTCANNN	0.001	-8.318	0.0004	587	0.03	784.1	0.0259
ERF7(AP2EREBP)/col-ERF7-DAP-Seq(GSE60143)/Homer	ATGRCGGCGG	0.001	-8.316	0.0004	1343	0.0686	1890.2	0.0624
Zic(Zf)/Cerebellum-ZIC1.2-ChIP-Seq(GSE60731)/Homer	CCTGCTGAGH	0.001	-8.304	0.0004	2357	0.1203	3402.6	0.1124
SRS7(SRS)/colamp-SRS7-DAP-Seq(GSE60143)/Homer	HATAGGTTTH	0.001	-8.251	0.0004	10401	0.5309	15700.5	0.5185
Phox2a(Homeobox)/Neuron-Phox2a-ChIP-Seq(GSE31456)/Homer	YTAATYNRATTA	0.001	-8.056	0.0005	2561	0.1307	3713.1	0.1226
FOXA1:AR(Forkhead,NR)/LNCAP-AR-ChIP-Seq(GSE27824)/Homer	AGTAAACAAAAAAGAACAND	0.001	-7.991	0.0006	387	0.0198	501.5	0.0166
AGL15(MADS)/col-AGL15-DAP-Seq(GSE60143)/Homer	TTTCCHWATWDGGAA	0.001	-7.925	0.0006	965	0.0493	1338.4	0.0442
PRDM9(Zf)/Testis-DMC1-ChIP-Seq(GSE35498)/Homer	ADGGYAGYAGCATCT	0.001	-7.824	0.0007	1395	0.0712	1974.7	0.0652
Hoxb4(Homeobox)/ES-Hoxb4-ChIP-Seq(GSE34014)/Homer	TGATTRATGGCY	0.001	-7.707	0.0007	938	0.0479	1301.2	0.043
ETS:E-box(ETS,bHLH)/HPC7-Scl-ChIP-Seq(GSE22178)/Homer	AGGAARCAGCTG	0.001	-7.653	0.0008	369	0.0188	478.9	0.0158
bZIP42(bZIP)/colamp-bZIP42-DAP-Seq(GSE60143)/Homer	GCCACGTCAGCA	0.001	-7.5	0.0009	5	0.0003	2	0.0001
Unknown-ESC-element(?)/mES-Nanog-ChIP-Seq(GSE11724)/Homer	CACAGCAGGGGG	0.001	-7.484	0.0009	1598	0.0816	2281.6	0.0754
RORgt(NR)/EL4-RORgt.Flag-ChIP-Seq(GSE56019)/Homer	AAYTAGGTCA	0.001	-7.471	0.0009	540	0.0276	724.1	0.0239
RORgt(NR)/EL4-RORgt.Flag-ChIP-Seq(GSE56019)/Homer	AAYTAGGTCA	0.001	-7.471	0.0009	540	0.0276	724.1	0.0239
BAM8(BES1)/col-BAM8-DAP-Seq(GSE60143)/Homer	NNWSACACGTGTSWN	0.001	-7.438	0.001	358	0.0183	464.5	0.0153
AT1G71450(AP2EREBP)/col-AT1G71450-DAP-Seq(GSE60143)/Homer	DHDWTGTCGGTG	0.001	-7.417	0.001	1512	0.0772	2154.1	0.0711
PRDM10(Zf)/HEK293-PRDM10.eGFP-ChIP-Seq(Encode)/Homer	TGGTACATTCCA	0.001	-7.377	0.001	1852	0.0945	2662.5	0.0879
Zfp809(Zf)/ES-Zfp809-ChIP-Seq(GSE70799)/Homer	GGGGCTYGKCTGGGA	0.001	-7.304	0.0011	452	0.0231	599.6	0.0198
OCT:OCT(POU,Homeobox,IR1)/NPC-Brn2-ChIP-Seq(GSE35496)/Homer	ATGAATWATTCATGA	0.001	-7.292	0.0011	132	0.0067	152.8	0.005
ASHR1(ND)/col-ASHR1-DAP-Seq(GSE60143)/Homer	NTGGTGAN	0.001	-7.215	0.0012	4249	0.2169	6286.4	0.2076
TGA3(bZIP)/colamp-TGA3-DAP-Seq(GSE60143)/Homer	WTGATGACGTCATCW	0.001	-7.215	0.0012	137	0.007	159.6	0.0053
PRDM14(Zf)/H1-PRDM14-ChIP-Seq(GSE22767)/Homer	RGGTCTCTAACY	0.001	-7.171	0.0012	1076	0.0549	1511.6	0.0499
At1g75490(AP2EREBP)/colamp-At1g75490-DAP-Seq(GSE60143)/Homer	CACCGMCT	0.001	-7.14	0.0013	2204	0.1125	3194.7	0.1055
ERF1(AP2EREBP)/colamp-ERF1-DAP-Seq(GSE60143)/Homer	GGCGGCTR	0.001	-7.107	0.0013	316	0.0161	407.4	0.0135
ATHB53(HB)/col-ATHB53-DAP-Seq(GSE60143)/Homer	CAATAATT	0.001	-7.069	0.0014	3486	0.1779	5131.3	0.1695
ERF4(AP2EREBP)/colamp-ERF4-DAP-Seq(GSE60143)/Homer	WDWTGGCGGCGG	0.001	-7.021	0.0014	824	0.0421	1142	0.0377
E2FA(E2FDP)/colamp-E2FA-DAP-Seq(GSE60143)/Homer	WWTGGCGCCAWWWNN	0.001	-6.997	0.0015	548	0.028	740.6	0.0245
ATHB24(ZFHD)/colamp-ATHB24-DAP-Seq(GSE60143)/Homer	TAATTAAS	0.01	-6.812	0.0017	4091	0.2088	6056.1	0.2
ZBTB18(Zf)/HEK293-ZBTB18.GFP-ChIP-Seq(GSE58341)/Homer	AACATCTGGA	0.01	-6.805	0.0018	1628	0.0831	2337.7	0.0772
RAR:RXR(NR),DR5/ES-RAR-ChIP-Seq(GSE56893)/Homer	RGGTCADNNAGAGGTCAV	0.01	-6.799	0.0018	88	0.0045	96.7	0.0032
At5g18450(AP2EREBP)/col-At5g18450-DAP-Seq(GSE60143)/Homer	CACCGCTT	0.01	-6.784	0.0018	1879	0.0959	2713.1	0.0896
WRKY11(WRKY)/col-WRKY11-DAP-Seq(GSE60143)/Homer	SCGTTGACTTTN	0.01	-6.724	0.0019	504	0.0257	679.9	0.0225
HIF-1b(HLH)/T47D-HIF1b-ChIP-Seq(GSE59937)/Homer	RTACGTGC	0.01	-6.707	0.0019	2649	0.1352	3873.3	0.1279
CUC2(NAC)/colamp-CUC2-DAP-Seq(GSE60143)/Homer	TRCKTGTNNNWCAMG	0.01	-6.674	0.002	978	0.0499	1373.6	0.0454
PBX1(Homeobox)/MCF7-PBX1-ChIP-Seq(GSE28007)/Homer	GSCTGTCACTCA	0.01	-6.663	0.002	237	0.0121	299.4	0.0099
GT1(Trihelix)/col-GT1-DAP-Seq(GSE60143)/Homer	TTAACCATGGTTAAD	0.01	-6.581	0.0022	60	0.0031	61.7	0.002
AT3G57600(AP2EREBP)/col-AT3G57600-DAP-Seq(GSE60143)/Homer	GGCGGTGG	0.01	-6.58	0.0022	530	0.0271	718.3	0.0237
FRS9(ND)/col-FRS9-DAP-Seq(GSE60143)/Homer	RGAGAGAGAAAG	0.01	-6.499	0.0023	1094	0.0558	1547.4	0.0511
Pknox1(Homeobox)/ES-Prep1-ChIP-Seq(GSE63282)/Homer	SCTGTCAVTCAV	0.01	-6.491	0.0024	744	0.038	1031.5	0.0341
At1g14580(C2H2)/colamp-At1g14580-DAP-Seq(GSE60143)/Homer	CASAAAAMGACAAAA	0.01	-6.458	0.0024	1072	0.0547	1515.3	0.05
Fosl2(bZIP)/3T3L1-Fosl2-ChIP-Seq(GSE56872)/Homer	NATGASTCABNN	0.01	-6.449	0.0025	1107	0.0565	1567.7	0.0518
ERF11(AP2EREBP)/col-ERF11-DAP-Seq(GSE60143)/Homer	RTGGCGGCGG	0.01	-6.443	0.0025	558	0.0285	760.7	0.0251
PRDM1(Zf)/Hela-PRDM1-ChIP-Seq(GSE31477)/Homer	ACTTTCACTTTC	0.01	-6.408	0.0026	2691	0.1374	3943.6	0.1302
bHLH130(bHLH)/col-bHLH130-DAP-Seq(GSE60143)/Homer	GCAACTTG	0.01	-6.38	0.0026	2417	0.1234	3530.2	0.1166
ERF2(AP2EREBP)/colamp-ERF2-DAP-Seq(GSE60143)/Homer	GGCGGCTG	0.01	-6.351	0.0027	336	0.0172	441.1	0.0146
MYB118(MYB)/colamp-MYB118-DAP-Seq(GSE60143)/Homer	TAWCCGTTAC	0.01	-6.329	0.0027	1012	0.0517	1428	0.0472
Gata6(Zf)/HUG1N-GATA6-ChIP-Seq(GSE51936)/Homer	YCTTATCTBN	0.01	-6.329	0.0027	4449	0.2271	6614.5	0.2185
AT1G12630(AP2EREBP)/colamp-AT1G12630-DAP-Seq(GSE60143)/Homer	TGTCGGCA	0.01	-6.294	0.0028	497	0.0254	673.5	0.0222
Reverb(NR),DR2/RAW-Reverba.biotin-ChIP-Seq(GSE45914)/Homer	GTRGGTCASTGGGTCA	0.01	-6.262	0.0029	367	0.0187	486.7	0.0161
AT1G24250(Orphan)/col-AT1G24250-DAP-Seq(GSE60143)/Homer	KTDGTTGGTDGTTGG	0.01	-6.228	0.003	1193	0.0609	1698.5	0.0561
Gata2(Zf)/K562-GATA2-ChIP-Seq(GSE18829)/Homer	BBCTTATCTS	0.01	-5.872	0.0043	3015	0.1539	4446.6	0.1469
Dorsal(RHD)/Embryo-dl-ChIP-Seq(GSE65441)/Homer	GGGAAAAMCCCG	0.01	-5.868	0.0043	638	0.0326	884	0.0292
HDG7(HB)/col-HDG7-DAP-Seq(GSE60143)/Homer	WGCATTTAATGC	0.01	-5.853	0.0044	1103	0.0563	1570.5	0.0519
ZNF692(Zf)/HEK293-ZNF692.GFP-ChIP-Seq(GSE58341)/Homer	GTGGGCCCCA	0.01	-5.765	0.0048	297	0.0152	390.4	0.0129
HOXA1(Homeobox)/mES-Hoxa1-ChIP-Seq(SRP084292)/Homer	TGATKGATGR	0.01	-5.612	0.0056	1232	0.0629	1767	0.0584
EMB1789(C3H)/col-EMB1789-DAP-Seq(GSE60143)/Homer	TWTTTACCGYND	0.01	-5.521	0.0061	2028	0.1035	2962.6	0.0978
Unknown6/Drosophila-Promoters/Homer	AATTTTAAAA	0.01	-5.475	0.0064	5866	0.2994	8806.3	0.2908
IRF2(IRF)/Erythroblas-IRF2-ChIP-Seq(GSE36985)/Homer	GAAASYGAAASY	0.01	-5.419	0.0067	451	0.023	615.2	0.0203
AGL16(MADS)/col-AGL16-DAP-Seq(GSE60143)/Homer	TWCCHWATWDGGAAA	0.01	-5.39	0.0069	555	0.0283	767.1	0.0253
GFX(?)/Promoter/Homer	ATTCTCGCGAGA	0.01	-5.261	0.0078	8	0.0004	5	0.0002
BPC6(BBRBPC)/col-BPC6-DAP-Seq(GSE60143)/Homer	YTYTCTCTCTCTCTA	0.01	-5.252	0.0079	192	0.0098	245.9	0.0081
CUC3(NAC)/col-CUC3-DAP-Seq(GSE60143)/Homer	TRCKTGWNNNACAMG	0.01	-5.21	0.0082	1082	0.0552	1549.8	0.0512
ZNF143|STAF(Zf)/CUTLL-ZNF143-ChIP-Seq(GSE29600)/Homer	ATTTCCCAGVAKSCY	0.01	-5.203	0.0083	924	0.0472	1314	0.0434
CBF1(AP2EREBP)/colamp-CBF1-DAP-Seq(GSE60143)/Homer	YRCCGACATN	0.01	-5.172	0.0085	586	0.0299	815	0.0269
DEAR2(AP2EREBP)/colamp-DEAR2-DAP-Seq(GSE60143)/Homer	HCACCGACAWHD	0.01	-5.136	0.0088	1004	0.0513	1434.2	0.0474
GATA(Zf),IR4/iTreg-Gata3-ChIP-Seq(GSE20898)/Homer	NAGATWNBNATCTNN	0.01	-5.108	0.009	391	0.02	531.2	0.0175
PHV(HB)/col-PHV-DAP-Seq(GSE60143)/Homer	RTAATSATTA	0.01	-5.072	0.0094	2226	0.1136	3271	0.108
Atoh1(bHLH)/Cerebellum-Atoh1-ChIP-Seq(GSE22111)/Homer	VNRVCAGCTGGY	0.01	-5.06	0.0095	3478	0.1775	5171.3	0.1708
T1ISRE(IRF)/ThioMac-Ifnb-Expression/Homer	ACTTTCGTTTCT	0.01	-4.978	0.0103	50	0.0026	53.4	0.0018
PAX6(Paired,Homeobox)/Forebrain-Pax6-ChIP-Seq(GSE66961)/Homer	NGTGTTCAVTSAAGCGKAAA	0.01	-4.976	0.0103	330	0.0168	444.9	0.0147
PRDM15(Zf)/ESC-Prdm15-ChIP-Seq(GSE73694)/Homer	YCCDNTCCAGGTTTT	0.01	-4.971	0.0103	3542	0.1808	5271.2	0.1741
AGL63(MADS)/col-AGL63-DAP-Seq(GSE60143)/Homer	TTCCAAWWWTGG	0.01	-4.964	0.0103	4372	0.2232	6537.4	0.2159
LIN-15B(Zf)/cElegans-L3-LIN15B-ChIP-Seq(modEncode)/Homer	CARTGGAGCGCRYTTGCATT	0.01	-4.954	0.0104	12	0.0006	8.7	0.0003
WRKY30(WRKY)/colamp-WRKY30-DAP-Seq(GSE60143)/Homer	CGTTGACTTN	0.01	-4.941	0.0106	928	0.0474	1324.3	0.0437
Tcfcp2l1(CP2)/mES-Tcfcp2l1-ChIP-Seq(GSE11431)/Homer	NRAACCRGTTYRAACCRGYT	0.01	-4.94	0.0106	327	0.0167	440.3	0.0145
HSFA6B(HSF)/colamp-HSFA6B-DAP-Seq(GSE60143)/Homer	NTTCTAGAANHTTCT	0.01	-4.889	0.0111	2583	0.1319	3816.1	0.126
HSF6(HSF)/col-HSF6-DAP-Seq(GSE60143)/Homer	TTYTAGAAGCTTCTA	0.01	-4.84	0.0116	1043	0.0532	1497.3	0.0495
SOC1(MADS)/Seedling-SOC1-ChIP-Seq(GSE45846)/Homer	TWCCAWWTWTGG	0.01	-4.802	0.0121	1967	0.1004	2886.7	0.0953
AGL13(MADS)/col-AGL13-DAP-Seq(GSE60143)/Homer	TWCCAWWTWTGGWAA	0.01	-4.782	0.0123	317	0.0162	428	0.0141
TCP20(TCP)/col-TCP20-DAP-Seq(GSE60143)/Homer	GGDCCCAC	0.01	-4.765	0.0125	668	0.0341	941.9	0.0311
Klf4(Zf)/mES-Klf4-ChIP-Seq(GSE11431)/Homer	GCCACACCCA	0.01	-4.735	0.0128	602	0.0307	844	0.0279
bHLH28(bHLH)/col-bHLH28-DAP-Seq(GSE60143)/Homer	NHHTGTACGGAH	0.01	-4.708	0.0132	415	0.0212	570.1	0.0188
AT3G09735(S1Falike)/col-AT3G09735-DAP-Seq(GSE60143)/Homer	TTCTAGAANMTTCTA	0.01	-4.676	0.0136	1926	0.0983	2827.8	0.0934
ANAC087(NAC)/col-ANAC087-DAP-Seq(GSE60143)/Homer	WVCKTGHNNNWCAMG	0.1	-4.603	0.0146	763	0.0389	1084	0.0358
OCT4-SOX2-TCF-NANOG(POU,Homeobox,HMG)/mES-Oct4-ChIP-Seq(GSE11431)/Homer	ATTTGCATAACAATG	0.1	-4.578	0.0149	1169	0.0597	1690.5	0.0558
Replumless(BLH)/Arabidopsis-RPL.GFP-ChIP-Seq(GSE78727)/Homer	HGTCWHATCA	0.1	-4.57	0.015	4198	0.2143	6284	0.2075
Unknown3/Arabidopsis-Promoters/Homer	AYTAAACCGG	0.1	-4.565	0.0151	337	0.0172	458.4	0.0151
CELF2(RRM)/JSL1-CELF2-CLIP-Seq(GSE71264)/Homer	RGTGTCAG	0.1	-4.538	0.0155	1087	0.0555	1568.1	0.0518
O2(bZIP)/Corn-O2-ChIP-Seq(GSE63991)/Homer	GCTGACGTGGCA	0.1	-4.506	0.016	360	0.0184	492.6	0.0163
Rap210(AP2EREBP)/col-Rap210-DAP-Seq(GSE60143)/Homer	TGTCGGCA	0.1	-4.46	0.0167	546	0.0279	765.5	0.0253
DPL-1(E2F)/cElegans-Adult-ChIP-Seq(modEncode)/Homer	TAGCGCGC	0.1	-4.391	0.0178	442	0.0226	613.9	0.0203
Jun-AP1(bZIP)/K562-cJun-ChIP-Seq(GSE31477)/Homer	GATGASTCATCN	0.1	-4.357	0.0184	743	0.0379	1058.4	0.035
CEBP:CEBP(bZIP)/MEF-Chop-ChIP-Seq(GSE35681)/Homer	NTNATGCAAYMNNHTGMAAY	0.1	-4.235	0.0208	819	0.0418	1173.2	0.0387
At3g09600(MYBrelated)/colamp-At3g09600-DAP-Seq(GSE60143)/Homer	AAAATATCTT	0.1	-4.134	0.023	3031	0.1547	4518.4	0.1492
Gata1(Zf)/K562-GATA1-ChIP-Seq(GSE18829)/Homer	SAGATAAGRV	0.1	-4.099	0.0238	2582	0.1318	3836	0.1267
p73(p53)/Trachea-p73-ChIP-Seq(PRJNA310161)/Homer	NRRRCAWGTCCDGRCATGYY	0.1	-4.089	0.024	134	0.0068	171.2	0.0057
Zic3(Zf)/mES-Zic3-ChIP-Seq(GSE37889)/Homer	GGCCYCCTGCTGDGH	0.1	-4.057	0.0247	1310	0.0669	1912.5	0.0632
At1g19210(AP2EREBP)/colamp-At1g19210-DAP-Seq(GSE60143)/Homer	HCACCGACCAHN	0.1	-4.032	0.0253	1461	0.0746	2140.4	0.0707
AIL7(AP2EREBP)/colamp-AIL7-DAP-Seq(GSE60143)/Homer	KCACRAWTYYCGAGG	0.1	-4.026	0.0254	1508	0.077	2211.6	0.073
At1g72010(TCP)/colamp-At1g72010-DAP-Seq(GSE60143)/Homer	GGDCCCAC	0.1	-4.007	0.0259	979	0.05	1416.7	0.0468
AT1G76880(Trihelix)/col-AT1G76880-DAP-Seq(GSE60143)/Homer	ACGGTAAAAW	0.1	-3.989	0.0263	2076	0.106	3071.9	0.1015
Pbx3(Homeobox)/GM12878-PBX3-ChIP-Seq(GSE32465)/Homer	SCTGTCAMTCAN	0.1	-3.971	0.0267	747	0.0381	1070.5	0.0354
Twist(bHLH)/HMLE-TWIST1-ChIP-Seq(Chang_et_al)/Homer	VCAKCTGGNNNCCAGMTGBN	0.1	-3.967	0.0268	380	0.0194	527.6	0.0174
SeqBias: polyC-repeat	CCCCCCCCCC	0.1	-3.926	0.0279	19431	0.9919	29989.6	0.9905
Bach1(bZIP)/K562-Bach1-ChIP-Seq(GSE31477)/Homer	AWWNTGCTGAGTCAT	0.1	-3.885	0.029	197	0.0101	262.6	0.0087
SeqBias: C/A-bias	MMMMMMMMMM	0.1	-3.882	0.029	19590	1	30272.4	0.9998
RRTF1(AP2EREBP)/colamp-RRTF1-DAP-Seq(GSE60143)/Homer	CCGCCGCHATTT	0.1	-3.869	0.0294	215	0.011	288.7	0.0095
LXRE(NR),DR4/RAW-LXRb.biotin-ChIP-Seq(GSE21512)/Homer	RGGTTACTANAGGTCA	0.1	-3.853	0.0298	152	0.0078	198.8	0.0066
At5g05790(MYBrelated)/col-At5g05790-DAP-Seq(GSE60143)/Homer	AYCTTATC	0.1	-3.835	0.0303	4231	0.216	6360.9	0.2101
AT3G51470(DBP)/col-AT3G51470-DAP-Seq(GSE60143)/Homer	TTWHGGTGCACC	0.1	-3.831	0.0304	4837	0.2469	7288.5	0.2407
MYB3R5(MYB)/col-MYB3R5-DAP-Seq(GSE60143)/Homer	THYAACGGTHAWAWT	0.1	-3.828	0.0304	221	0.0113	297.5	0.0098
HDG1(Homeobox)/col100-HDG1-DAP-Seq(GSE60143)/Homer	DDYAATTAATGH	0.1	-3.744	0.0331	3578	0.1826	5365.7	0.1772
GEI-11(Myb?)/cElegans-L4-GEI11-ChIP-Seq(modEncode)/Homer	CCGACAYYTYACGGG	0.1	-3.733	0.0334	75	0.0038	91.5	0.003
PLT1(AP2EREBP)/colamp-PLT1-DAP-Seq(GSE60143)/Homer	GCACGAWTYCCGAGG	0.1	-3.73	0.0334	178	0.0091	236.3	0.0078
ZNF519(Zf)/HEK293-ZNF519.GFP-ChIP-Seq(GSE58341)/Homer	GAGSCCGAGC	0.1	-3.697	0.0345	311	0.0159	430	0.0142
Oct11(POU,Homeobox)/NCIH1048-POU2F3-ChIP-seq(GSE115123)/Homer	GATTTGCATA	0.1	-3.668	0.0355	1788	0.0913	2643.1	0.0873
ERF10(AP2EREBP)/col-ERF10-DAP-Seq(GSE60143)/Homer	RTGGCGGCGG	0.1	-3.661	0.0357	419	0.0214	588.7	0.0194
PLT3(AP2EREBP)/col-PLT3-DAP-Seq(GSE60143)/Homer	GCACGNWTHYCGAGG	0.1	-3.659	0.0357	115	0.0059	147.2	0.0049
CAMTA5(CAMTA)/col-CAMTA5-DAP-Seq(GSE60143)/Homer	ACGCGTTTTANACRC	0.1	-3.631	0.0367	601	0.0307	858.7	0.0284
At5g65130(AP2EREBP)/colamp-At5g65130-DAP-Seq(GSE60143)/Homer	CCRCCGACAWTN	0.1	-3.615	0.0372	155	0.0079	204.2	0.0067
ZNF415(Zf)/HEK293-ZNF415.GFP-ChIP-Seq(GSE58341)/Homer	GRTGMTRGAGCC	0.1	-3.596	0.0379	1302	0.0665	1910.4	0.0631
FHY3(FAR1)/Arabidopsis-FHY3-ChIP-Seq(GSE30711)/Homer	HHCACGCGCBTN	0.1	-3.581	0.0384	256	0.0131	350.3	0.0116
SPL14(SBP)/col-SPL14-DAP-Seq(GSE60143)/Homer	NNWHTGTACGGAHNH	0.1	-3.525	0.0405	281	0.0143	387.1	0.0128
At5g29000(G2like)/col-At5g29000-DAP-Seq(GSE60143)/Homer	RGAATATTCYHH	0.1	-3.496	0.0417	1462	0.0746	2154.8	0.0712
Pitx1:Ebox(Homeobox,bHLH)/Hindlimb-Pitx1-ChIP-Seq(GSE41591)/Homer	YTAATTRAWWCCAGATGT	0.1	-3.485	0.0421	1096	0.0559	1602.5	0.0529
ISRE(IRF)/ThioMac-LPS-Expression(GSE23622)/Homer	AGTTTCASTTTC	0.1	-3.439	0.044	266	0.0136	366.7	0.0121
DUX(Homeobox)/C2C12-Dux-ChIP-Seq(GSE87279)/Homer	BCWGATTCAATCAAN	0.1	-3.438	0.044	18	0.0009	17.6	0.0006
ZSCAN22(Zf)/HEK293-ZSCAN22.GFP-ChIP-Seq(GSE58341)/Homer	SMCAGTCWGAKGGAGGAGGC	0.1	-3.409	0.0452	156	0.008	207.2	0.0068
DREB2(AP2EREBP)/col-DREB2-DAP-Seq(GSE60143)/Homer	TMACCGACATWA	0.1	-3.406	0.0453	458	0.0234	649.5	0.0214
AGL95(ND)/col-AGL95-DAP-Seq(GSE60143)/Homer	TTCTAGAAGCTTCTA	0.1	-3.362	0.0473	465	0.0237	660.7	0.0218
HRE(HSF)/Striatum-HSF1-ChIP-Seq(GSE38000)/Homer	TTCTAGAABNTTCTA	0.1	-3.271	0.0517	861	0.044	1253.9	0.0414
MYB30(MYB)/colamp-MYB30-DAP-Seq(GSE60143)/Homer	AGGTAGTTGG	0.1	-3.256	0.0524	3569	0.1822	5369.9	0.1773
CAMTA1(CAMTA)/col-CAMTA1-DAP-Seq(GSE60143)/Homer	WWAACGCGTT	0.1	-3.253	0.0525	468	0.0239	666.1	0.022
dHNF4(NR)/Fly-HNF4-ChIP-Seq(GSE73675)/Homer	GGTCCAAAGTCCAMT	0.1	-3.199	0.0554	143	0.0073	190.1	0.0063
Unknown4/Arabidopsis-Promoters/Homer	CKTCKTCTTY	0.1	-3.192	0.0557	3604	0.184	5425.8	0.1792
p63(p53)/Keratinocyte-p63-ChIP-Seq(GSE17611)/Homer	NNDRCATGYCYNRRCATGYH	0.1	-3.187	0.0558	947	0.0483	1384	0.0457
bHLH157(bHLH)/col-bHLH157-DAP-Seq(GSE60143)/Homer	KACACGTCTCTY	0.1	-3.179	0.0562	513	0.0262	734.6	0.0243
CBF3(AP2EREBP)/colamp-CBF3-DAP-Seq(GSE60143)/Homer	YNRCCGACATNN	0.1	-3.168	0.0568	420	0.0214	596.2	0.0197
ESE1(AP2EREBP)/col-ESE1-DAP-Seq(GSE60143)/Homer	GGCGGCGG	0.1	-3.165	0.0568	349	0.0178	492	0.0162
RORa(NR)/Liver-Rora-ChIP-Seq(GSE101115)/Homer	AAWCTAGGTCARDNN	0.1	-3.144	0.058	571	0.0291	821.1	0.0271
Tbox:Smad(T-box,MAD)/ESCd5-Smad2_3-ChIP-Seq(GSE29422)/Homer	AGGTGHCAGACA	0.1	-3.089	0.0612	559	0.0285	804.5	0.0266
AT1G77200(AP2EREBP)/colamp-AT1G77200-DAP-Seq(GSE60143)/Homer	ACCGACAHWD	0.1	-3.056	0.0631	713	0.0364	1035.5	0.0342
SPL5(SBP)/colamp-SPL5-DAP-Seq(GSE60143)/Homer	NNHGTACGGHNN	0.1	-3.03	0.0647	734	0.0375	1067.7	0.0353
Tbr1(T-box)/Cortex-Tbr1-ChIP-Seq(GSE71384)/Homer	AAGGTGTKAA	0.1	-2.974	0.0684	5843	0.2983	8869.9	0.2929
Gli2(Zf)/GM2-Gli2-ChIP-Chip(GSE112702)/Homer	YSTGGGTGGTCT	0.1	-2.929	0.0714	598	0.0305	865.8	0.0286
AT1G19040(NAC)/col-AT1G19040-DAP-Seq(GSE60143)/Homer	CTTGNDNHNCAAGYW	0.1	-2.855	0.0768	263	0.0134	368.8	0.0122
DDF1(AP2EREBP)/col-DDF1-DAP-Seq(GSE60143)/Homer	GCCGACAT	0.1	-2.702	0.0893	400	0.0204	573.5	0.0189
ARF16(ARF)/col-ARF16-DAP-Seq(GSE60143)/Homer	ATTTTACGAT	0.1	-2.696	0.0898	410	0.0209	589	0.0195
SVP(MADS)/col-SVP-DAP-Seq(GSE60143)/Homer	ANTTWCCHAATTTGG	0.1	-2.676	0.0915	3107	0.1586	4685.9	0.1548
CRF10(AP2EREBP)/col100-CRF10-DAP-Seq(GSE60143)/Homer	DCCGCCGYHA	0.1	-2.652	0.0936	562	0.0287	816.6	0.027
CTCF-SatelliteElement(Zf?)/CD4+-CTCF-ChIP-Seq(Barski_et_al.)/Homer	TGCAGTTCCMVNWRTGGCCA	0.1	-2.641	0.0945	45	0.0023	55.8	0.0018
GRHL2(CP2)/HBE-GRHL2-ChIP-Seq(GSE46194)/Homer	AAACYKGTTWDACMRGTTTB	0.1	-2.61	0.0973	1378	0.0703	2050.6	0.0677
CCA(Myb)/Arabidopsis-CCA.GFP-ChIP-Seq(GSE70533)/Homer	AGATATYTTT	0.1	-2.604	0.0978	4359	0.2225	6607.3	0.2182
NUC(C2H2)/col-NUC-DAP-Seq(GSE60143)/Homer	HAVAAAACGACAAAA	0.1	-2.597	0.0983	546	0.0279	793.7	0.0262
SeqBias: G/A bias	RRRRRRRRRR	0.1	-2.588	0.0991	19590	1	30274.3	0.9999
GATA6(C2C2gata)/col200-GATA6-DAP-Seq(GSE60143)/Homer	TAGATCTARAHH	0.1	-2.573	0.1005	493	0.0252	714.5	0.0236
TCP7(TCP)/col-TCP7-DAP-Seq(GSE60143)/Homer	GTGGGSCCCACHHNN	0.1	-2.496	0.1084	1047	0.0534	1551.2	0.0512
ESE3(AP2EREBP)/col-ESE3-DAP-Seq(GSE60143)/Homer	GACGGTGG	0.1	-2.474	0.1106	812	0.0414	1196.5	0.0395
EFL-1(E2F)/cElegans-L1-EFL1-ChIP-Seq(modEncode)/Homer	TGCAARYGCGCTCYA	0.1	-2.459	0.1122	32	0.0016	38.9	0.0013
NFE2L2(bZIP)/HepG2-NFE2L2-ChIP-Seq(Encode)/Homer	AWWWTGCTGAGTCAT	0.1	-2.458	0.1122	232	0.0118	327.8	0.0108
GATA19(C2C2gata)/colamp-GATA19-DAP-Seq(GSE60143)/Homer	ATCSGATCVG	0.1	-2.413	0.1171	193	0.0099	270.8	0.0089
Unknown2/Arabidopsis-Promoters/Homer	AAACGACGTCGTTTT	0.1	-2.348	0.1249	12	0.0006	12.7	0.0004
At3g11280(MYBrelated)/col-At3g11280-DAP-Seq(GSE60143)/Homer	GATAAGRT	0.1	-2.336	0.1262	3976	0.203	6032.7	0.1992
At4g16750(AP2EREBP)/col-At4g16750-DAP-Seq(GSE60143)/Homer	HACCGACAHA	0.1	-2.317	0.1284	711	0.0363	1047.8	0.0346
AT2G20400(G2like)/colamp-AT2G20400-DAP-Seq(GSE60143)/Homer	DNVGAATATTCBNHN	0.1	-2.304	0.1299	775	0.0396	1144.9	0.0378
DEL2(E2FDP)/col-DEL2-DAP-Seq(GSE60143)/Homer	WTTTCSCGCC	1	-2.297	0.1306	716	0.0365	1055.9	0.0349
CBF4(AP2EREBP)/colamp-CBF4-DAP-Seq(GSE60143)/Homer	NRCCGACDWNNNNNN	1	-2.275	0.1334	609	0.0311	894.7	0.0295
LEP(AP2EREBP)/col-LEP-DAP-Seq(GSE60143)/Homer	CDCCGCCGTC	1	-2.252	0.1363	83	0.0042	111.3	0.0037
At2g03500(G2like)/col-At2g03500-DAP-Seq(GSE60143)/Homer	WWAGAATATTCT	1	-2.22	0.1406	1279	0.0653	1911.1	0.0631
Duxbl(Homeobox)/NIH3T3-Duxbl.HA-ChIP-Seq(GSE119782)/Homer	TAAYCYAATCAA	1	-2.212	0.1415	342	0.0175	494.1	0.0163
At1g13300(G2like)/col-At1g13300-DAP-Seq(GSE60143)/Homer	GAATCTWAGATTCYN	1	-2.201	0.1429	37	0.0019	46.1	0.0015
MYB3R1(MYB)/col-MYB3R1-DAP-Seq(GSE60143)/Homer	WWDTDACCGTTR	1	-2.174	0.1466	868	0.0443	1288.8	0.0426
HSFC1(HSF)/col-HSFC1-DAP-Seq(GSE60143)/Homer	HTTCTAGAADCTTCT	1	-2.15	0.15	921	0.047	1369.3	0.0452
ERF3(AP2EREBP)/colamp-ERF3-DAP-Seq(GSE60143)/Homer	ATGGCGGCGG	1	-2.146	0.1504	386	0.0197	562	0.0186
Ronin(THAP)/ES-Thap11-ChIP-Seq(GSE51522)/Homer	RACTACAACTCCCAGVAKGC	1	-2.136	0.1518	20	0.001	23.2	0.0008
ATHB20(Homeobox)/colamp-ATHB20-DAP-Seq(GSE60143)/Homer	CAATHATT	1	-2.127	0.1528	2666	0.1361	4033.7	0.1332
EKLF(Zf)/Erythrocyte-Klf1-ChIP-Seq(GSE20478)/Homer	NWGGGTGTGGCY	1	-2.117	0.1542	383	0.0196	557.3	0.0184
ZNF669(Zf)/HEK293-ZNF669.GFP-ChIP-Seq(GSE58341)/Homer	GARTGGTCATCGCCC	1	-2.075	0.1606	145	0.0074	203.7	0.0067
HSF7(HSF)/colamp-HSF7-DAP-Seq(GSE60143)/Homer	TTCTAGAAGCTTCTA	1	-2.072	0.161	915	0.0467	1362	0.045
CBF2(AP2EREBP)/colamp-CBF2-DAP-Seq(GSE60143)/Homer	YBRCCGACATNNNNN	1	-2.04	0.1659	426	0.0217	623.7	0.0206
Unknown3/Drosophila-Promoters/Homer	ACVAKCTGGCAGCGC	1	-2.019	0.1692	202	0.0103	288.5	0.0095
MYB3R4(MYB)/col-MYB3R4-DAP-Seq(GSE60143)/Homer	AWWTAACCGTTR	1	-2.011	0.1704	417	0.0213	610.2	0.0202
SHN3(AP2EREBP)/col-SHN3-DAP-Seq(GSE60143)/Homer	CCGCCGCC	1	-2.004	0.1713	81	0.0041	110.6	0.0037
E2F(E2F)/Hela-CellCycle-Expression/Homer	TTSGCGCGAAAA	1	-1.996	0.1725	49	0.0025	64.6	0.0021
RORg(NR)/Liver-Rorc-ChIP-Seq(GSE101115)/Homer	WAABTAGGTCAV	1	-1.975	0.1759	382	0.0195	558.9	0.0185
bZIP69(bZIP)/col-bZIP69-DAP-Seq(GSE60143)/Homer	GACAGCTGKCAW	1	-1.916	0.1863	366	0.0187	535.9	0.0177
GFY(?)/Promoter/Homer	ACTACAATTCCC	1	-1.911	0.1871	160	0.0082	227.3	0.0075
CEJ1(AP2EREBP)/col-CEJ1-DAP-Seq(GSE60143)/Homer	WWTGTCGGTG	1	-1.904	0.1882	977	0.0499	1461.9	0.0483
MYB94(MYB)/col-MYB94-DAP-Seq(GSE60143)/Homer	WGGTRGTTGGKA	1	-1.899	0.1888	1248	0.0637	1874.2	0.0619
ANAC017(NAC)/colamp-ANAC017-DAP-Seq(GSE60143)/Homer	TMCTTGNNNNNCAAG	1	-1.886	0.1911	235	0.012	339.5	0.0112
AT3G60490(AP2EREBP)/colamp-AT3G60490-DAP-Seq(GSE60143)/Homer	NNRCCGACANNNNNN	1	-1.882	0.1916	247	0.0126	357.8	0.0118
ZFP3(Zf)/HEK293-ZFP3.GFP-ChIP-Seq(GSE58341)/Homer	GGGTTTTGAAGGATGARTAGGAGTT	1	-1.881	0.1916	8	0.0004	8.3	0.0003
AT1G04880(ARID)/colamp-AT1G04880-DAP-Seq(GSE60143)/Homer	AAACTATATADTATA	1	-1.861	0.1951	848	0.0433	1266.8	0.0418
Six4(Homeobox)/MCF7-SIX4-ChIP-Seq(Encode)/Homer	TGWAAYCTGABACCB	1	-1.861	0.1951	212	0.0108	305.8	0.0101
LHY(Myb)/Seedling-LHY-ChIP-Seq(GSE52175)/Homer	ADAAATATCT	1	-1.849	0.1971	5184	0.2646	7916.7	0.2615
At5g52660(MYBrelated)/colamp-At5g52660-DAP-Seq(GSE60143)/Homer	HAAAAATATCTW	1	-1.837	0.1992	3019	0.1541	4588.3	0.1515
MYB96(MYB)/colamp-MYB96-DAP-Seq(GSE60143)/Homer	WGGTRGTTGG	1	-1.813	0.2038	2927	0.1494	4448.4	0.1469
GATA3(Zf),DR8/iTreg-Gata3-ChIP-Seq(GSE20898)/Homer	AGATSTNDNNDSAGATAASN	1	-1.758	0.215	297	0.0152	434.6	0.0144
ZNF528(Zf)/HEK293-ZNF528.GFP-ChIP-Seq(GSE58341)/Homer	AGAAATGACTTCCCT	1	-1.749	0.2168	29	0.0015	37.8	0.0012
AT3G58630(Trihelix)/col-AT3G58630-DAP-Seq(GSE60143)/Homer	TCTCCGGCGA	1	-1.744	0.2175	127	0.0065	180.8	0.006
MYB116(MYB)/colamp-MYB116-DAP-Seq(GSE60143)/Homer	AGTTAGGCAN	1	-1.711	0.2245	2607	0.1331	3962.5	0.1309
DREB19(AP2EREBP)/colamp-DREB19-DAP-Seq(GSE60143)/Homer	AATGTCGGTK	1	-1.677	0.2319	480	0.0245	712.4	0.0235
At4g01280(MYBrelated)/colamp-At4g01280-DAP-Seq(GSE60143)/Homer	AAATATCT	1	-1.652	0.2376	3394	0.1733	5174.5	0.1709
Phox2b(Homeobox)/CLBGA-PHOX2B-ChIP-Seq(GSE90683)/Homer	TTAATTNAATTA	1	-1.628	0.243	1334	0.0681	2015.7	0.0666
MafK(bZIP)/C2C12-MafK-ChIP-Seq(GSE36030)/Homer	GCTGASTCAGCA	1	-1.623	0.2439	603	0.0308	900.6	0.0297
WRKY21(WRKY)/colamp-WRKY21-DAP-Seq(GSE60143)/Homer	DCGTTGACTTTT	1	-1.594	0.2509	484	0.0247	720.3	0.0238
TOD6?/SacCer-Promoters/Homer	GCGATGAGMT	1	-1.543	0.2636	445	0.0227	662.6	0.0219
ELT-3(Gata)/cElegans-L1-ELT3-ChIP-Seq(modEncode)/Homer	AWTGATAAGA	1	-1.511	0.2717	2388	0.1219	3636.1	0.1201
ZNF16(Zf)/HEK293-ZNF16.GFP-ChIP-Seq(GSE58341)/Homer	MACCTTCYATGGCTCCCTAKTGCCY	1	-1.502	0.2739	26	0.0013	34.1	0.0011
NFY(CCAAT)/Promoter/Homer	RGCCAATSRG	1	-1.483	0.2789	2581	0.1318	3934.5	0.1299
AT3G42860(zfGRF)/col-AT3G42860-DAP-Seq(GSE60143)/Homer	CGTTGACTTN	1	-1.477	0.2802	862	0.044	1299.2	0.0429
GATA(Zf),IR3/iTreg-Gata3-ChIP-Seq(GSE20898)/Homer	NNNNNBAGATAWYATCTVHN	1	-1.453	0.2867	661	0.0337	993.1	0.0328
Sp1(Zf)/Promoter/Homer	GGCCCCGCCCCC	1	-1.448	0.2876	130	0.0066	188.7	0.0062
At2g44940(AP2EREBP)/colamp-At2g44940-DAP-Seq(GSE60143)/Homer	NYACCGACAHNNNNN	1	-1.433	0.2918	211	0.0108	310.8	0.0103
WRKY8(WRKY)/colamp-WRKY8-DAP-Seq(GSE60143)/Homer	CGTTGACTTT	1	-1.4	0.3011	538	0.0275	807.6	0.0267
E2F7(E2F)/Hela-E2F7-ChIP-Seq(GSE32673)/Homer	VDTTTCCCGCCA	1	-1.385	0.3052	88	0.0045	126.5	0.0042
Oct2(POU,Homeobox)/Bcell-Oct2-ChIP-Seq(GSE21512)/Homer	ATATGCAAAT	1	-1.372	0.3089	1592	0.0813	2421.1	0.08
DDF2(AP2EREBP)/col-DDF2-DAP-Seq(GSE60143)/Homer	GATGTCGRCR	1	-1.358	0.3129	46	0.0023	64.8	0.0021
PAX5(Paired,Homeobox),condensed/GM12878-PAX5-ChIP-Seq(GSE32465)/Homer	GTCACGCTCSCTGM	1	-1.272	0.3406	225	0.0115	334.7	0.0111
Mouse_Recombination_Hotspot(Zf)/Testis-DMC1-ChIP-Seq(GSE24438)/Homer	ACTYKNATTCGTGNTACTTC	1	-1.266	0.3422	300	0.0153	448	0.0148
LOB(LOBAS2)/col-LOB-DAP-Seq(GSE60143)/Homer	CGCCGKAWWTTHCGS	1	-1.252	0.3467	91	0.0046	132.3	0.0044
AT2G15740(C2H2)/col-AT2G15740-DAP-Seq(GSE60143)/Homer	DHNDWATCGATD	1	-1.251	0.3467	2311	0.118	3532.3	0.1167
bHLH10(bHLH)/colamp-bHLH10-DAP-Seq(GSE60143)/Homer	YACCGACA	1	-1.22	0.357	252	0.0129	377	0.0125
NFkB-p65-Rel(RHD)/ThioMac-LPS-Expression(GSE23622)/Homer	GGAAATTCCC	1	-1.219	0.357	196	0.01	291.5	0.0096
ERF38(AP2EREBP)/col-ERF38-DAP-Seq(GSE60143)/Homer	CACCGACA	1	-1.195	0.3652	379	0.0193	570.5	0.0188
SPL13(SBP)/col-SPL13-DAP-Seq(GSE60143)/Homer	WAHTGTACGGAH	1	-1.187	0.3675	121	0.0062	178.8	0.0059
AT4G12670(MYBrelated)/col-AT4G12670-DAP-Seq(GSE60143)/Homer	AGGGTTTAGGGTTTA	1	-1.18	0.3699	3	0.0002	3.7	0.0001
ZNF41(Zf)/HEK293-ZNF41.GFP-ChIP-Seq(GSE58341)/Homer	CCTCATGGTGYCYTWYTCCCTTGTG	1	-1.132	0.3875	94	0.0048	138.3	0.0046
BOS1(MYB)/col-BOS1-DAP-Seq(GSE60143)/Homer	NNRCCTAACT	1	-1.13	0.3879	3160	0.1613	4847.2	0.1601
MYB44(MYB)/colamp-MYB44-DAP-Seq(GSE60143)/Homer	CVGTTWWKTCNGTTA	1	-1.092	0.4025	319	0.0163	481	0.0159
AT1G01250(AP2EREBP)/col-AT1G01250-DAP-Seq(GSE60143)/Homer	YCACCGACAHTW	1	-1.075	0.4086	71	0.0036	105	0.0035
ATHB15(HB)/col-ATHB15-DAP-Seq(GSE60143)/Homer	GYAATSATTA	1	-1.057	0.4157	1722	0.0879	2637.3	0.0871
DEL1(E2FDP)/colamp-DEL1-DAP-Seq(GSE60143)/Homer	TTCCCGCCAA	1	-1.055	0.4159	5	0.0003	6.8	0.0002
DUX4(Homeobox)/Myoblasts-DUX4.V5-ChIP-Seq(GSE75791)/Homer	NWTAAYCYAATCAWN	1	-1.029	0.4266	229	0.0117	345.8	0.0114
HAP3(CCAATHAP3)/col-HAP3-DAP-Seq(GSE60143)/Homer	TGATGGAW	1	-1.017	0.431	1217	0.0621	1862.5	0.0615
bZIP44(bZIP)/colamp-bZIP44-DAP-Seq(GSE60143)/Homer	NDTGCCACGTCAGCH	1	-1.009	0.434	38	0.0019	55.6	0.0018
TCP16(TCP)/colamp-TCP16-DAP-Seq(GSE60143)/Homer	GTGGDCCYNNNNNNN	1	-0.9985	0.438	1334	0.0681	2044	0.0675
NRF(NRF)/Promoter/Homer	STGCGCATGCGC	1	-0.996	0.4386	125	0.0064	187.3	0.0062
Hnf6b(Homeobox)/LNCaP-Hnf6b-ChIP-Seq(GSE106305)/Homer	TATTGAYY	1	-0.9894	0.441	4517	0.2306	6951.3	0.2296
ERF5(AP2EREBP)/colamp-ERF5-DAP-Seq(GSE60143)/Homer	DCMGCCGCCA	1	-0.9679	0.4501	200	0.0102	302.1	0.01
At4g28140(AP2EREBP)/colamp-At4g28140-DAP-Seq(GSE60143)/Homer	DCCACCGACCAW	1	-0.9429	0.4609	231	0.0118	350.2	0.0116
SPL3(SBP)/colamp-SPL3-DAP-Seq(GSE60143)/Homer	WDTTGTACGGAH	1	-0.9358	0.4637	60	0.0031	89.6	0.003
HRE(HSF)/HepG2-HSF1-ChIP-Seq(GSE31477)/Homer	BSTTCTRGAABVTTCYAGAA	1	-0.9254	0.4679	436	0.0223	665.6	0.022
LBD2(LOBAS2)/colamp-LBD2-DAP-Seq(GSE60143)/Homer	TCCGAWTTTTTCGGN	1	-0.9224	0.4688	542	0.0277	828.7	0.0274
HAT1(Homeobox)/col-HAT1-DAP-Seq(GSE60143)/Homer	SCAATCATTGNN	1	-0.9212	0.4688	930	0.0475	1425.4	0.0471
TINY(AP2EREBP)/col-TINY-DAP-Seq(GSE60143)/Homer	NNCACCGACA	1	-0.8925	0.4819	225	0.0115	342.2	0.0113
PQM-1(?)/cElegans-L3-ChIP-Seq(modEncode)/Homer	ACTGATAAGA	1	-0.8447	0.5048	1895	0.0967	2917.4	0.0964
RARg(NR)/ES-RARg-ChIP-Seq(GSE30538)/Homer	AGGTCAAGGTCA	1	-0.8227	0.5155	63	0.0032	95	0.0031
OCT:OCT(POU,Homeobox)/NPC-OCT6-ChIP-Seq(GSE43916)/Homer	YATGCATATRCATRT	1	-0.8179	0.5174	494	0.0252	758.9	0.0251
At2g45680(TCP)/colamp-At2g45680-DAP-Seq(GSE60143)/Homer	GTGGGNCCCACNDND	1	-0.7821	0.5356	129	0.0066	197.4	0.0065
AT2G01818(PLATZ)/col-AT2G01818-DAP-Seq(GSE60143)/Homer	TCTAGAABSTTC	1	-0.7553	0.5495	646	0.033	995.3	0.0329
PUCHI(AP2EREBP)/colamp-PUCHI-DAP-Seq(GSE60143)/Homer	GCGCCGTY	1	-0.7487	0.5525	185	0.0094	284.3	0.0094
REM16(ABI3VP1)/col-REM16-DAP-Seq(GSE60143)/Homer	DTTTTTSCCGSMAAA	1	-0.7415	0.5558	1	0.0001	0	0
AT3G16280(AP2EREBP)/colamp-AT3G16280-DAP-Seq(GSE60143)/Homer	HCACCGACAHHDHHN	1	-0.7411	0.5558	321	0.0164	494.2	0.0163
Knotted(Homeobox)/Corn-KN1-ChIP-Seq(GSE39161)/Homer	GAYGNGACRGGN	1	-0.6989	0.5786	3932	0.2007	6076.8	0.2007
HAT5(Homeobox)/colamp-HAT5-DAP-Seq(GSE60143)/Homer	DCAATWATTG	1	-0.6985	0.5786	940	0.048	1452.7	0.048
AT4G18450(AP2EREBP)/col-AT4G18450-DAP-Seq(GSE60143)/Homer	ATGGCGGCKG	1	-0.6789	0.589	211	0.0108	326.5	0.0108
At1g77640(AP2EREBP)/col-At1g77640-DAP-Seq(GSE60143)/Homer	TGTCGGTGGA	1	-0.6764	0.5898	156	0.008	241.9	0.008
DREB26(AP2EREBP)/col-DREB26-DAP-Seq(GSE60143)/Homer	CCACCGACAH	1	-0.6568	0.6007	177	0.009	274.2	0.0091
Ik-1	NHTTGGGAATRCC	1	-0.647	0.6059	19590	1	30278.7	1
AT1G44830(AP2EREBP)/col-AT1G44830-DAP-Seq(GSE60143)/Homer	NCCACCGACA	1	-0.6457	0.606	253	0.0129	392.6	0.013
ZIM(C2C2gata)/col-ZIM-DAP-Seq(GSE60143)/Homer	ATCSRACGGTYRAGA	1	-0.6382	0.6098	22	0.0011	34.7	0.0011
ZNF165(Zf)/WHIM12-ZNF165-ChIP-Seq(GSE65937)/Homer	AAGGKGRCGCAGGCA	1	-0.6372	0.6098	227	0.0116	353	0.0117
ERF9(AP2EREBP)/colamp-ERF9-DAP-Seq(GSE60143)/Homer	AWATGGCGGCGG	1	-0.618	0.6208	99	0.0051	154.3	0.0051
HOXA2(Homeobox)/mES-Hoxa2-ChIP-Seq(Donaldson_et_al.)/Homer	GYCATCMATCAT	1	-0.6062	0.6275	416	0.0212	646.3	0.0213
E2F1(E2F)/Hela-E2F1-ChIP-Seq(GSE22478)/Homer	CWGGCGGGAA	1	-0.6014	0.6298	167	0.0085	260.5	0.0086
At1g69690(TCP)/colamp-At1g69690-DAP-Seq(GSE60143)/Homer	NHGTGGGGCCCACHW	1	-0.579	0.6433	481	0.0246	748.6	0.0247
GFY-Staf(?,Zf)/Promoter/Homer	RACTACAATTCCCAGAAKGC	1	-0.5728	0.6465	74	0.0038	116.9	0.0039
NRF1(NRF)/MCF7-NRF1-ChIP-Seq(Unpublished)/Homer	CTGCGCATGCGC	1	-0.5668	0.6497	33	0.0017	52.8	0.0017
Hnf1(Homeobox)/Liver-Foxa2-Chip-Seq(GSE25694)/Homer	GGTTAAWCATTAA	1	-0.5621	0.652	810	0.0413	1259.4	0.0416
E2F4(E2F)/K562-E2F4-ChIP-Seq(GSE31477)/Homer	GGCGGGAAAH	1	-0.5603	0.6524	425	0.0217	662.2	0.0219
RAR:RXR(NR),DR5/ES-RAR-ChIP-Seq(GSE56893)/Homer	AGGTCAAGGTCA	1	-0.5388	0.6658	286	0.0146	447.7	0.0148
PTF1(TCP)/colamp-PTF1-DAP-Seq(GSE60143)/Homer	RDDGGGACCACA	1	-0.5301	0.6709	183	0.0093	287.4	0.0095
LRF(Zf)/Erythroblasts-ZBTB7A-ChIP-Seq(GSE74977)/Homer	AAGACCCYYN	1	-0.522	0.6756	2853	0.1456	4427.1	0.1462
At1g22810(AP2EREBP)/colamp-At1g22810-DAP-Seq(GSE60143)/Homer	BCACCGACANNN	1	-0.5195	0.6765	344	0.0176	538.7	0.0178
WRKY46(WRKY)/colamp-WRKY46-DAP-Seq(GSE60143)/Homer	AAAGTCAACGSN	1	-0.5178	0.6768	168	0.0086	264.2	0.0087
NFkB-p50,p52(RHD)/Monocyte-p50-ChIP-Chip(Schreiber_et_al.)/Homer	GGGGGAATCCCC	1	-0.4824	0.7004	198	0.0101	312.3	0.0103
AT5G59990(C2C2COlike)/colamp-AT5G59990-DAP-Seq(GSE60143)/Homer	TCTCAACCGTTCATT	1	-0.4793	0.7019	55	0.0028	88.5	0.0029
DEAR3(AP2EREBP)/colamp-DEAR3-DAP-Seq(GSE60143)/Homer	BCACCGACAWNNNNN	1	-0.475	0.704	301	0.0154	473.6	0.0156
Pax7(Paired,Homeobox),long/Myoblast-Pax7-ChIP-Seq(GSE25064)/Homer	TAATCHGATTAC	1	-0.4597	0.7141	147	0.0075	233.6	0.0077
ZNF382(Zf)/HEK293-ZNF382.GFP-ChIP-Seq(GSE58341)/Homer	GNCTGTASTRNTGBCTCHTT	1	-0.4526	0.7183	87	0.0044	139.7	0.0046
AT1G23810(Orphan)/col-AT1G23810-DAP-Seq(GSE60143)/Homer	TTCTAGAAGSTTCTA	1	-0.4465	0.7219	178	0.0091	282	0.0093
MYB93(MYB)/colamp-MYB93-DAP-Seq(GSE60143)/Homer	GGTAGGTGRD	1	-0.4408	0.7253	3736	0.1907	5805.7	0.1917
Eomes(T-box)/H9-Eomes-ChIP-Seq(GSE26097)/Homer	ATTAACACCT	1	-0.4198	0.7398	8443	0.431	13092.6	0.4324
AT5G22990(C2H2)/col-AT5G22990-DAP-Seq(GSE60143)/Homer	WCGAHDTCGWHN	1	-0.4082	0.7476	73	0.0037	118.1	0.0039
At1g36060(AP2EREBP)/colamp-At1g36060-DAP-Seq(GSE60143)/Homer	NNWWKGTCGGTG	1	-0.3997	0.7531	560	0.0286	881.2	0.0291
RVE1(MYBrelated)/col-RVE1-DAP-Seq(GSE60143)/Homer	AAATATCT	1	-0.3796	0.7675	3266	0.1667	5086.7	0.168
ZBTB33(Zf)/GM12878-ZBTB33-ChIP-Seq(GSE32465)/Homer	GGVTCTCGCGAGAAC	1	-0.3776	0.7682	14	0.0007	24.6	0.0008
SeqBias: polyA-repeat	AAAAAAAAAA	1	-0.3672	0.7753	19588	0.9999	30275.5	0.9999
GLI3(Zf)/Limb-GLI3-ChIP-Chip(GSE11077)/Homer	CGTGGGTGGTCC	1	-0.3601	0.78	242	0.0124	386.1	0.0128
p53(p53)/Saos-p53-ChIP-Seq(GSE15780)/Homer	RRCATGYCYRGRCATGYYYN	1	-0.3513	0.7852	264	0.0135	421.1	0.0139
p53(p53)/Saos-p53-ChIP-Seq/Homer	RRCATGYCYRGRCATGYYYN	1	-0.3513	0.7852	264	0.0135	421.1	0.0139
CRF4(AP2EREBP)/colamp-CRF4-DAP-Seq(GSE60143)/Homer	CGCCGCCA	1	-0.3132	0.8147	217	0.0111	349.6	0.0115
NeuroD1(bHLH)/Islet-NeuroD1-ChIP-Seq(GSE30298)/Homer	GCCATCTGTT	1	-0.3006	0.8241	2471	0.1261	3865.7	0.1277
HSFA1E(HSF)/col-HSFA1E-DAP-Seq(GSE60143)/Homer	TTCTAGAAGCTTCTA	1	-0.2998	0.8241	334	0.017	534.5	0.0177
ATHB18(Homeobox)/colamp-ATHB18-DAP-Seq(GSE60143)/Homer	YCAATSATTG	1	-0.2829	0.8369	1018	0.052	1606.5	0.0531
Bach2(bZIP)/OCILy7-Bach2-ChIP-Seq(GSE44420)/Homer	TGCTGAGTCA	1	-0.269	0.8477	572	0.0292	910.2	0.0301
Pax7(Paired,Homeobox),longest/Myoblast-Pax7-ChIP-Seq(GSE25064)/Homer	NTAATTDGCYAATTANNWWD	1	-0.269	0.8477	143	0.0073	234.2	0.0077
RBPJ:Ebox(?,bHLH)/Panc1-Rbpj1-ChIP-Seq(GSE47459)/Homer	GGGRAARRGRMCAGMTG	1	-0.2672	0.8477	1004	0.0513	1586.2	0.0524
SFP1/SacCer-Promoters/Homer	DDAAAAATTTTY	1	-0.2601	0.8524	641	0.0327	1019.9	0.0337
DEAR5(AP2EREBP)/col-DEAR5-DAP-Seq(GSE60143)/Homer	NDWTGTCGGTGRWDN	1	-0.25	0.8602	118	0.006	196	0.0065
ANAC094(NAC)/col-ANAC094-DAP-Seq(GSE60143)/Homer	DVCGTRNNNNNYACG	1	-0.2468	0.862	158	0.0081	259.3	0.0086
REST-NRSF(Zf)/Jurkat-NRSF-ChIP-Seq/Homer	GGMGCTGTCCATGGTGCTGA	1	-0.2454	0.8622	10	0.0005	19.5	0.0006
WRKY7(WRKY)/colamp-WRKY7-DAP-Seq(GSE60143)/Homer	AAAAGTCAACGSHWD	1	-0.2405	0.8655	6	0.0003	12.9	0.0004
Nrf2(bZIP)/Lymphoblast-Nrf2-ChIP-Seq(GSE37589)/Homer	HTGCTGAGTCAT	1	-0.2007	0.8996	137	0.007	228.9	0.0076
AT4G27900(C2C2COlike)/col-AT4G27900-DAP-Seq(GSE60143)/Homer	TCTCVACCGTTSATT	1	-0.1979	0.9012	9	0.0005	18	0.0006
ZML1(C2C2gata)/colamp-ZML1-DAP-Seq(GSE60143)/Homer	ATCWYRACCGTTSRW	1	-0.1968	0.9012	17	0.0009	32.2	0.0011
BZR1(BZR)/col-BZR1-DAP-Seq(GSE60143)/Homer	NNCRCACGTGCG	1	-0.1953	0.9015	158	0.0081	262.7	0.0087
HSFB4(HSF)/col-HSFB4-DAP-Seq(GSE60143)/Homer	TTCTAGAAGCTTCTA	1	-0.1877	0.9074	139	0.0071	232.5	0.0077
AS2(LOBAS2)/col-AS2-DAP-Seq(GSE60143)/Homer	CCGDAAWWHMCGSCG	1	-0.186	0.9079	10	0.0005	20.1	0.0007
HSFB3(HSF)/colamp-HSFB3-DAP-Seq(GSE60143)/Homer	TTCTAGAAGMTTHTW	1	-0.1695	0.922	311	0.0159	508.2	0.0168
WRKY17(WRKY)/colamp-WRKY17-DAP-Seq(GSE60143)/Homer	GCGTTGACTTTT	1	-0.1678	0.9226	33	0.0017	60.9	0.002
At4g31060(AP2EREBP)/colamp-At4g31060-DAP-Seq(GSE60143)/Homer	CACCGACAAW	1	-0.1615	0.9274	347	0.0177	566.3	0.0187
DREF/Drosophila-Promoters/Homer	AVYTATCGATAD	1	-0.1547	0.9327	28	0.0014	52.5	0.0017
TR4(NR),DR1/Hela-TR4-ChIP-Seq(GSE24685)/Homer	GAGGTCAAAGGTCA	1	-0.1416	0.9439	239	0.0122	396.9	0.0131
MYB57(MYB)/col-MYB57-DAP-Seq(GSE60143)/Homer	TTACCTAACT	1	-0.132	0.952	1842	0.094	2920.1	0.0964
TCP1(TCP)/col-TCP1-DAP-Seq(GSE60143)/Homer	GGGGGCCCMMCN	1	-0.1185	0.9639	559	0.0285	908.2	0.03
HIF2a(bHLH)/785_O-HIF2a-ChIP-Seq(GSE34871)/Homer	GCACGTACCC	1	-0.1174	0.9639	736	0.0376	1188.9	0.0393
At4g32800(AP2EREBP)/colamp-At4g32800-DAP-Seq(GSE60143)/Homer	DYCACCGACAHWWWH	1	-0.1161	0.9641	102	0.0052	178	0.0059
HSF21(HSF)/col-HSF21-DAP-Seq(GSE60143)/Homer	CTTCTAGAAGMTTYW	1	-0.1073	0.9715	467	0.0238	764.6	0.0253
TCP3(TCP)/colamp-TCP3-DAP-Seq(GSE60143)/Homer	WGTGGTCCCAAHWWW	1	-0.1073	0.9715	679	0.0347	1100.1	0.0363
STOP1(C2H2)/colamp-STOP1-DAP-Seq(GSE60143)/Homer	DTATCTGGKGRAGGT	1	-0.09372	0.9827	1232	0.0629	1975.6	0.0652
NF-E2(bZIP)/K562-NFE2-ChIP-Seq(GSE31477)/Homer	GATGACTCAGCA	1	-0.09132	0.984	163	0.0083	279.8	0.0092
MYB107(MYB)/col-MYB107-DAP-Seq(GSE60143)/Homer	RGTWGGTRRR	1	-0.08331	0.9908	5142	0.2625	8081.1	0.2669
ANAC042(NAC)/col-ANAC042-DAP-Seq(GSE60143)/Homer	CGTNDHNDHNACGKY	1	-0.06847	1	254	0.013	430.9	0.0142
ZBTB12(Zf)/HEK293-ZBTB12.GFP-ChIP-Seq(GSE58341)/Homer	NGNTCTAGAACCNGV	1	-0.06342	1	1132	0.0578	1828.5	0.0604
RAP21(AP2EREBP)/colamp-RAP21-DAP-Seq(GSE60143)/Homer	BCACCGACAHNN	1	-0.05703	1	149	0.0076	261.3	0.0086
MYB13(MYB)/col-MYB13-DAP-Seq(GSE60143)/Homer	HYCACCWACCHH	1	-0.0517	1	2121	0.1083	3389.4	0.1119
LCL1(MYBrelated)/colamp-LCL1-DAP-Seq(GSE60143)/Homer	NAAAATATCTWHWWN	1	-0.05133	1	927	0.0473	1509.3	0.0498
GATA3(Zf),DR4/iTreg-Gata3-ChIP-Seq(GSE20898)/Homer	AGATGKDGAGATAAG	1	-0.04817	1	388	0.0198	652	0.0215
SeqBias: GCW-triplet	GCWGCWGCWGCW	1	-0.04342	1	19587	0.9998	30276.7	0.9999
AT2G28920(ND)/col-AT2G28920-DAP-Seq(GSE60143)/Homer	WAGATATTTWTW	1	-0.03809	1	1723	0.088	2773.6	0.0916
TSO1(CPP)/col-TSO1-DAP-Seq(GSE60143)/Homer	RAATTTRAAW	1	-0.0311	1	946	0.0483	1550	0.0512
MYB61(MYB)/colamp-MYB61-DAP-Seq(GSE60143)/Homer	HCYACCTACC	1	-0.02802	1	4792	0.2446	7585.8	0.2505
CDM1(C3H)/colamp-CDM1-DAP-Seq(GSE60143)/Homer	CCGAWAWTWTCGGAN	1	-0.02606	1	116	0.0059	213.6	0.0071
HNF1b(Homeobox)/PDAC-HNF1B-ChIP-Seq(GSE64557)/Homer	GTTAATNATTAA	1	-0.02187	1	848	0.0433	1401.4	0.0463
AT3G10113(MYBrelated)/col-AT3G10113-DAP-Seq(GSE60143)/Homer	WNAAATATCWWN	1	-0.02159	1	2633	0.1344	4220.1	0.1394
YY1(Zf)/Promoter/Homer	CAAGATGGCGGC	1	-0.01554	1	81	0.0041	157.3	0.0052
MYB83(MYB)/colamp-MYB83-DAP-Seq(GSE60143)/Homer	CACCAACCWH	1	-0.01543	1	5949	0.3037	9410	0.3108
MS188(MYB)/colamp-MS188-DAP-Seq(GSE60143)/Homer	WARKTAGGTRRA	1	-0.0111	1	3316	0.1693	5312.3	0.1754
At5g22890(C2H2)/col-At5g22890-DAP-Seq(GSE60143)/Homer	NSAGGTKWTATCTGD	1	-0.01002	1	113	0.0058	215.4	0.0071
TCP17(TCP)/col-TCP17-DAP-Seq(GSE60143)/Homer	GTGGTCCCCA	1	-0.006268	1	79	0.004	159.8	0.0053
EPR1(MYBrelated)/colamp-EPR1-DAP-Seq(GSE60143)/Homer	AAATATCT	1	-0.005814	1	2173	0.1109	3532.8	0.1167
LHY1(MYBrelated)/col-LHY1-DAP-Seq(GSE60143)/Homer	AAATATCT	1	-0.005814	1	2173	0.1109	3532.8	0.1167
MYB27(MYB)/colamp-MYB27-DAP-Seq(GSE60143)/Homer	TACCTAACWT	1	-0.003641	1	733	0.0374	1246.5	0.0412
MYB62(MYB)/colamp-MYB62-DAP-Seq(GSE60143)/Homer	NTACCTAACT	1	-0.003324	1	4453	0.2273	7130.5	0.2355
EBNA1(EBV-virus)/Raji-EBNA1-ChIP-Seq(GSE30709)/Homer	GGYAGCAYDTGCTDCCCNNN	1	-0.003259	1	22	0.0011	57.4	0.0019
AT1G10720(BSD)/col-AT1G10720-DAP-Seq(GSE60143)/Homer	TTCTAGAAKCTTCTA	1	-0.002226	1	87	0.0044	179.5	0.0059
MYB63(MYB)/col-MYB63-DAP-Seq(GSE60143)/Homer	BHYACCWACCHH	1	-0.002204	1	1364	0.0696	2268.9	0.0749
HSFA6A(HSF)/col-HSFA6A-DAP-Seq(GSE60143)/Homer	RGAAGNTTCTAGAAN	1	-0.001988	1	127	0.0065	250.8	0.0083
WIP5(C2H2)/colamp-WIP5-DAP-Seq(GSE60143)/Homer	TDTTCTCMAGGT	1	-0.00059	1	3693	0.1885	5985.9	0.1977
HINFP(Zf)/K562-HINFP.eGFP-ChIP-Seq(Encode)/Homer	TWVGGTCCGC	1	-0.000449	1	140	0.0071	282.6	0.0093
MYB3(MYB)/Arabidopsis-MYB3-ChIP-Seq(GSE80564)/Homer	GKTAGGTRGG	1	-0.000375	1	4827	0.2464	7777.6	0.2569
Pax7(Paired,Homeobox)/Myoblast-Pax7-ChIP-Seq(GSE25064)/Homer	TAATCAATTA	1	-0.000362	1	518	0.0264	923.5	0.0305
ZML2(C2C2gata)/col-ZML2-DAP-Seq(GSE60143)/Homer	CATCATCATC	1	-0.000202	1	659	0.0336	1162.1	0.0384
CUX1(Homeobox)/K562-CUX1-ChIP-Seq(GSE92882)/Homer	TATCGATNAN	1	-9.6e-05	1	3239	0.1653	5310.9	0.1754
CTCF(Zf)/CD4+-CTCF-ChIP-Seq(Barski_et_al.)/Homer	AYAGTGCCMYCTRGTGGCCA	1	-1.1e-05	1	168	0.0086	353.1	0.0117
MYB99(MYB)/colamp-MYB99-DAP-Seq(GSE60143)/Homer	GGTAGGTG	1	-9e-06	1	2731	0.1394	4549.6	0.1503
BORIS(Zf)/K562-CTCFL-ChIP-Seq(GSE32465)/Homer	CNNBRGCGCCCCCTGSTGGC	1	-8e-06	1	213	0.0109	435.8	0.0144
MYB49(MYB)/col-MYB49-DAP-Seq(GSE60143)/Homer	ARKTAGGTRR	1	-8e-06	1	3960	0.2021	6501.9	0.2147
ZKSCAN1(Zf)/HepG2-ZKSCAN1-ChIP-Seq(Encode)/Homer	GCACAYAGTAGGKCY	1	-7e-06	1	51	0.0026	136.1	0.0045
Ascl1(bHLH)/NeuralTubes-Ascl1-ChIP-Seq(GSE55840)/Homer	NNVVCAGCTGBN	1	-4e-06	1	3960	0.2021	6512.2	0.2151
MYB121(MYB)/col-MYB121-DAP-Seq(GSE60143)/Homer	YNTACCTAACWW	1	-4e-06	1	1350	0.0689	2339.8	0.0773
MYB58(MYB)/colamp-MYB58-DAP-Seq(GSE60143)/Homer	YYYACCWACC	1	-4e-06	1	3054	0.1559	5078.7	0.1677
AT4G26030(C2H2)/col-AT4G26030-DAP-Seq(GSE60143)/Homer	BYYACCWACY	1	-2e-06	1	3189	0.1628	5300.8	0.1751
HNF6(Homeobox)/Liver-Hnf6-ChIP-Seq(ERP000394)/Homer	NTATYGATCH	1	-2e-06	1	2441	0.1246	4109.4	0.1357
MYB74(MYB)/colamp-MYB74-DAP-Seq(GSE60143)/Homer	YYYACCTACCWH	1	-2e-06	1	2194	0.112	3717.6	0.1228
MYB39(MYB)/col-MYB39-DAP-Seq(GSE60143)/Homer	WWAARKTAGGTGRAA	1	-1e-06	1	605	0.0309	1120.9	0.037
MYB17(MYB)/colamp-MYB17-DAP-Seq(GSE60143)/Homer	GGTAGGTGRG	1	0	1	1402	0.0716	2451.5	0.081
Cux2(Homeobox)/Liver-Cux2-ChIP-Seq(GSE35985)/Homer	HNRAATCAAT	1	0	1	2037	0.104	3490.9	0.1153
AT3G10580(MYBrelated)/colamp-AT3G10580-DAP-Seq(GSE60143)/Homer	TACCTAACWNHW	1	0	1	1555	0.0794	2717.3	0.0897
MYB51(MYB)/col-MYB51-DAP-Seq(GSE60143)/Homer	GGTAGGTG	1	0	1	2365	0.1207	4037.7	0.1333
MYB92(MYB)/colamp-MYB92-DAP-Seq(GSE60143)/Homer	GGTAGGTR	1	0	1	2659	0.1357	4523.4	0.1494
Tbx21(T-box)/GM12878-TBX21-ChIP-Seq(Encode)/Homer	AGGTGTGAAA	1	0	1	3736	0.1907	6248.7	0.2064
MYB55(MYB)/colamp-MYB55-DAP-Seq(GSE60143)/Homer	YACCWAMC	1	0	1	3492	0.1783	5860.1	0.1935
MYB40(MYB)/col-MYB40-DAP-Seq(GSE60143)/Homer	TGGTAGGTRARA	1	0	1	1121	0.0572	2037.4	0.0673
MYB67(MYB)/col-MYB67-DAP-Seq(GSE60143)/Homer	YYYACCTAAC	1	0	1	3069	0.1567	5212.9	0.1722
ATY19(MYB)/col-ATY19-DAP-Seq(GSE60143)/Homer	YYCACCWACCAT	1	0	1	2174	0.111	3809.4	0.1258
MYB10(MYB)/col-MYB10-DAP-Seq(GSE60143)/Homer	YCCACCTACCHH	1	0	1	1133	0.0578	2096.1	0.0692
MYB4(MYB)/col200-MYB4-DAP-Seq(GSE60143)/Homer	WAGKTAGGTARR	1	0	1	2241	0.1144	3934	0.1299
Tbet(T-box)/CD8-Tbet-ChIP-Seq(GSE33802)/Homer	AGGTGTGAAM	1	0	1	3919	0.2001	6692.7	0.221
Ptf1a(bHLH)/Panc1-Ptf1a-ChIP-Seq(GSE47459)/Homer	ACAGCTGTTN	1	0	1	6804	0.3473	11279.2	0.3725
MYB41(MYB)/col-MYB41-DAP-Seq(GSE60143)/Homer	BYTYACCTAA	1	0	1	997	0.0509	1932.9	0.0638
SCRT1(Zf)/HEK293-SCRT1.eGFP-ChIP-Seq(Encode)/Homer	GCAACAGGTG	1	0	1	687	0.0351	1419.8	0.0469
Ascl2(bHLH)/ESC-Ascl2-ChIP-Seq(GSE97712)/Homer	SSRGCAGCTGCH	1	0	1	2436	0.1243	4394	0.1451
E2A(bHLH)/proBcell-E2A-ChIP-Seq(GSE21978)/Homer	DNRCAGCTGY	1	0	1	3032	0.1548	5824.4	0.1924
E2A(bHLH),near_PU.1/Bcell-PU.1-ChIP-Seq(GSE21512)/Homer	NVCACCTGBN	1	0	1	2024	0.1033	5990.5	0.1978
HEB(bHLH)/mES-Heb-ChIP-Seq(GSE53233)/Homer	VCAGCTGBNN	1	0	1	4397	0.2245	7779.1	0.2569
Slug(Zf)/Mesoderm-Snai2-ChIP-Seq(GSE61475)/Homer	SNGCACCTGCHS	1	0	1	651	0.0332	2166.8	0.0716
Tbx5(T-box)/HL1-Tbx5.biotin-ChIP-Seq(GSE21529)/Homer	AGGTGTCA	1	0	1	8856	0.4521	14593.6	0.482
Tbx6(T-box)/ESC-Tbx6-ChIP-Seq(GSE93524)/Homer	DAGGTGTBAA	1	0	1	3073	0.1569	5910.6	0.1952
ZEB1(Zf)/PDAC-ZEB1-ChIP-Seq(GSE64557)/Homer	VCAGGTRDRY	1	0	1	2632	0.1344	7765.6	0.2565
ZEB2(Zf)/SNU398-ZEB2-ChIP-Seq(GSE103048)/Homer	GNMCAGGTGTGC	1	0	1	1278	0.0652	3951	0.1305
Zelda(Zf)/Embryo-zld-ChIP-Seq(GSE65441)/Homer	KBCTACCTGW	1	0	1	769	0.0393	2415.8	0.0798
NGA4(ABI3VP1)/col-NGA4-DAP-Seq(GSE60143)/Homer	TKNTCAGGTG	1	0	1	5695	0.2907	11632.1	0.3842

## Sheet: Homer_HumanMES-vs-HumanMEL
Complete output from Homer on differential regions in human MES lines versus human MEL lines.
Motif Name	Consensus	P-value	Log P-value	q-value (Benjamini)	# of Target Sequences with Motif(of 10232)	% of Target Sequences with Motif	# of Background Sequences with Motif(of 39607)	% of Background Sequences with Motif
Fra1(bZIP)/BT549-Fra1-ChIP-Seq(GSE46166)/Homer	NNATGASTCATH	1e-2985	-6874	0	5992	0.5856	4285.5	0.1082
Atf3(bZIP)/GBM-ATF3-ChIP-Seq(GSE33912)/Homer	DATGASTCATHN	1e-2975	-6851	0	6343	0.6199	5009.8	0.1265
BATF(bZIP)/Th17-BATF-ChIP-Seq(GSE39756)/Homer	DATGASTCAT	1e-2843	-6548	0	6200	0.6059	4974.2	0.1256
JunB(bZIP)/DendriticCells-Junb-ChIP-Seq(GSE36099)/Homer	RATGASTCAT	1e-2817	-6488	0	5786	0.5655	4195.3	0.1059
Fra2(bZIP)/Striatum-Fra2-ChIP-Seq(GSE43429)/Homer	GGATGACTCATC	1e-2804	-6457	0	5396	0.5274	3507.4	0.0886
AP-1(bZIP)/ThioMac-PU.1-ChIP-Seq(GSE21512)/Homer	VTGACTCATC	1e-2763	-6363	0	6421	0.6275	5627.3	0.1421
Fosl2(bZIP)/3T3L1-Fosl2-ChIP-Seq(GSE56872)/Homer	NATGASTCABNN	1e-2321	-5344	0	4155	0.4061	2263.9	0.0572
Jun-AP1(bZIP)/K562-cJun-ChIP-Seq(GSE31477)/Homer	GATGASTCATCN	1e-1944	-4478	0	3284	0.321	1563.3	0.0395
Bach2(bZIP)/OCILy7-Bach2-ChIP-Seq(GSE44420)/Homer	TGCTGAGTCA	1e-895	-2061	0	2010	0.1964	1312.7	0.0331
MafK(bZIP)/C2C12-MafK-ChIP-Seq(GSE36030)/Homer	GCTGASTCAGCA	1e-301	-694.9	0	1168	0.1142	1254.3	0.0317
NF-E2(bZIP)/K562-NFE2-ChIP-Seq(GSE31477)/Homer	GATGACTCAGCA	1e-248	-572.2	0	588	0.0575	385.2	0.0097
Bach1(bZIP)/K562-Bach1-ChIP-Seq(GSE31477)/Homer	AWWNTGCTGAGTCAT	1e-229	-529.3	0	567	0.0554	389.7	0.0098
TEAD1(TEAD)/HepG2-TEAD1-ChIP-Seq(Encode)/Homer	CYRCATTCCA	1e-223	-513.8	0	3342	0.3266	7650.4	0.1932
TEAD(TEA)/Fibroblast-PU.1-ChIP-Seq(Unpublished)/Homer	YCWGGAATGY	1e-221	-510.3	0	2637	0.2577	5486.2	0.1385
TEAD3(TEA)/HepG2-TEAD3-ChIP-Seq(Encode)/Homer	TRCATTCCAG	1e-214	-493.1	0	3681	0.3598	8848.1	0.2234
TEAD4(TEA)/Tropoblast-Tead4-ChIP-Seq(GSE37350)/Homer	CCWGGAATGY	1e-213	-492.5	0	2862	0.2797	6239.9	0.1576
Nrf2(bZIP)/Lymphoblast-Nrf2-ChIP-Seq(GSE37589)/Homer	HTGCTGAGTCAT	1e-195	-451.2	0	471	0.046	313.4	0.0079
NFE2L2(bZIP)/HepG2-NFE2L2-ChIP-Seq(Encode)/Homer	AWWWTGCTGAGTCAT	1e-174	-402.9	0	486	0.0475	378.5	0.0096
TEAD2(TEA)/Py2T-Tead2-ChIP-Seq(GSE55709)/Homer	CCWGGAATGY	1e-152	-351.6	0	1866	0.1824	3840.2	0.097
RUNX(Runt)/HPC7-Runx1-ChIP-Seq(GSE22178)/Homer	SAAACCACAG	1e-134	-309.6	0	2153	0.2104	4881.6	0.1233
MafB(bZIP)/BMM-Mafb-ChIP-Seq(GSE75722)/Homer	WNTGCTGASTCAGCANWTTY	1e-132	-305.1	0	1443	0.141	2813.1	0.071
c-Jun-CRE(bZIP)/K562-cJun-ChIP-Seq(GSE31477)/Homer	ATGACGTCATCY	1e-125	-288.4	0	1098	0.1073	1935.5	0.0489
RUNX2(Runt)/PCa-RUNX2-ChIP-Seq(GSE33889)/Homer	NWAACCACADNN	1e-125	-288.2	0	2427	0.2372	5847.4	0.1476
RUNX1(Runt)/Jurkat-RUNX1-ChIP-Seq(GSE29180)/Homer	AAACCACARM	1e-120	-278.1	0	2853	0.2788	7288.1	0.184
MafA(bZIP)/Islet-MafA-ChIP-Seq(GSE30298)/Homer	TGCTGACTCA	1e-116	-269.1	0	2260	0.2209	5421.1	0.1369
RUNX-AML(Runt)/CD4+-PolII-ChIP-Seq(Barski_et_al.)/Homer	GCTGTGGTTW	1e-115	-265.6	0	2123	0.2075	5009.3	0.1265
Atf7(bZIP)/3T3L1-Atf7-ChIP-Seq(GSE56872)/Homer	NGRTGACGTCAY	1e-108	-250	0	1434	0.1401	3003.3	0.0758
Atf2(bZIP)/3T3L1-Atf2-ChIP-Seq(GSE56872)/Homer	NRRTGACGTCAT	1e-106	-244.9	0	1087	0.1062	2048	0.0517
Foxo3(Forkhead)/U2OS-Foxo3-ChIP-Seq(E-MTAB-2701)/Homer	DGTAAACA	1e-104	-240.6	0	2444	0.2389	6176.2	0.1559
Foxf1(Forkhead)/Lung-Foxf1-ChIP-Seq(GSE77951)/Homer	WWATRTAAACAN	1e-99	-229.6	0	2915	0.2849	7812.5	0.1973
FOXA1(Forkhead)/LNCAP-FOXA1-ChIP-Seq(GSE27824)/Homer	WAAGTAAACA	1e-88	-202.8	0	3499	0.342	10033	0.2533
NF1(CTF)/LNCAP-NF1-ChIP-Seq(Unpublished)/Homer	CYTGGCABNSTGCCAR	1e-87	-201	0	1163	0.1137	2429.8	0.0613
FOXK1(Forkhead)/HEK293-FOXK1-ChIP-Seq(GSE51673)/Homer	NVWTGTTTAC	1e-82	-189.6	0	3086	0.3016	8698	0.2196
FoxL2(Forkhead)/Ovary-FoxL2-ChIP-Seq(GSE60858)/Homer	WWTRTAAACAVG	1e-82	-189.4	0	2665	0.2605	7257.9	0.1833
Pdx1(Homeobox)/Islet-Pdx1-ChIP-Seq(SRA008281)/Homer	YCATYAATCA	1e-81	-188.8	0	3154	0.3082	8940.9	0.2257
FOXA1(Forkhead)/MCF7-FOXA1-ChIP-Seq(GSE26831)/Homer	WAAGTAAACA	1e-79	-183.8	0	2988	0.292	8405.4	0.2122
FOXP1(Forkhead)/H9-FOXP1-ChIP-Seq(GSE31006)/Homer	NYYTGTTTACHN	1e-71	-163.9	0	1439	0.1406	3437.7	0.0868
Atf1(bZIP)/K562-ATF1-ChIP-Seq(GSE31477)/Homer	GATGACGTCA	1e-70	-161.8	0	1775	0.1735	4511.3	0.1139
ETS1(ETS)/Jurkat-ETS1-ChIP-Seq(GSE17954)/Homer	ACAGGAAGTG	1e-66	-153.9	0	2479	0.2423	6903.7	0.1743
FOXM1(Forkhead)/MCF7-FOXM1-ChIP-Seq(GSE72977)/Homer	TRTTTACTTW	1e-66	-152.2	0	2984	0.2916	8661.1	0.2187
Foxa3(Forkhead)/Liver-Foxa3-ChIP-Seq(GSE77670)/Homer	BSNTGTTTACWYWGN	1e-66	-152	0	1194	0.1167	2752.9	0.0695
Foxa2(Forkhead)/Liver-Foxa2-ChIP-Seq(GSE25694)/Homer	CYTGTTTACWYW	1e-61	-141.7	0	2385	0.2331	6684	0.1688
Etv2(ETS)/ES-ER71-ChIP-Seq(GSE59402)/Homer	NNAYTTCCTGHN	1e-57	-131.6	0	2285	0.2233	6430.1	0.1624
Fli1(ETS)/CD8-FLI-ChIP-Seq(GSE20898)/Homer	NRYTTCCGGH	1e-56	-131.2	0	2399	0.2345	6823.1	0.1723
Foxo1(Forkhead)/RAW-Foxo1-ChIP-Seq(Fan_et_al.)/Homer	CTGTTTAC	1e-55	-128	0	4294	0.4197	13642.8	0.3445
ERG(ETS)/VCaP-ERG-ChIP-Seq(GSE14097)/Homer	ACAGGAAGTG	1e-55	-126.9	0	3604	0.3522	11123.8	0.2809
ETV4(ETS)/HepG2-ETV4-ChIP-Seq(ENCODE)/Homer	ACCGGAAGTG	1e-52	-122	0	2287	0.2235	6521.4	0.1647
Fox:Ebox(Forkhead,bHLH)/Panc1-Foxa2-ChIP-Seq(GSE47459)/Homer	NNNVCTGWGYAAACASN	1e-51	-118.8	0	2580	0.2522	7564.7	0.191
bZIP50(bZIP)/colamp-bZIP50-DAP-Seq(GSE60143)/Homer	GATGACGTCA	1e-51	-117.7	0	2006	0.1961	5603.8	0.1415
PHA-4(Forkhead)/cElegans-Embryos-PHA4-ChIP-Seq(modEncode)/Homer	KTGTTTGC	1e-50	-115.7	0	6436	0.629	22019.3	0.556
NF1-halfsite(CTF)/LNCaP-NF1-ChIP-Seq(Unpublished)/Homer	YTGCCAAG	1e-50	-115.7	0	3831	0.3744	12078.2	0.305
EWS:ERG-fusion(ETS)/CADO_ES1-EWS:ERG-ChIP-Seq(SRA014231)/Homer	ATTTCCTGTN	1e-48	-111.8	0	2066	0.2019	5858.9	0.1479
ETV1(ETS)/GIST48-ETV1-ChIP-Seq(GSE22441)/Homer	AACCGGAAGT	1e-48	-111.1	0	2879	0.2814	8695	0.2195
CEBP(bZIP)/ThioMac-CEBPb-ChIP-Seq(GSE21512)/Homer	ATTGCGCAAC	1e-47	-109.7	0	1921	0.1877	5385.6	0.136
FoxD3(forkhead)/ZebrafishEmbryo-Foxd3.biotin-ChIP-seq(GSE106676)/Homer	TGTTTAYTTAGC	1e-47	-108.5	0	2406	0.2351	7059.7	0.1782
PBX2(Homeobox)/K562-PBX2-ChIP-Seq(Encode)/Homer	RTGATTKATRGN	1e-46	-107.1	0	2542	0.2484	7548.2	0.1906
FOXK2(Forkhead)/U2OS-FOXK2-ChIP-Seq(E-MTAB-2204)/Homer	SCHTGTTTACAT	1e-45	-105.9	0	1850	0.1808	5179.5	0.1308
NFIL3(bZIP)/HepG2-NFIL3-ChIP-Seq(Encode)/Homer	VTTACGTAAYNNNNN	1e-45	-104.1	0	1860	0.1818	5229.8	0.132
FEA4(bZIP)/Corn-FEA4-ChIP-Seq(GSE61954)/Homer	TGACGTCACS	1e-44	-102.9	0	2273	0.2221	6653.3	0.168
Tlx?(NR)/NPC-H3K4me1-ChIP-Seq(GSE16256)/Homer	CTGGCAGSCTGCCA	1e-44	-102.1	0	1089	0.1064	2720.2	0.0687
GABPA(ETS)/Jurkat-GABPa-ChIP-Seq(GSE17954)/Homer	RACCGGAAGT	1e-44	-102	0	1915	0.1872	5434.6	0.1372
JunD(bZIP)/K562-JunD-ChIP-Seq/Homer	ATGACGTCATCN	1e-42	-98.28	0	286	0.028	435.6	0.011
LIN-39(Homeobox)/cElegans.L3-LIN39-ChIP-Seq(modEncode)/Homer	ATGATTRATG	1e-42	-97.46	0	3589	0.3508	11413.1	0.2882
CRC(C2C2YABBY)/col-CRC-DAP-Seq(GSE60143)/Homer	TWATSATA	1e-41	-95.72	0	3723	0.3639	11927.6	0.3012
TGA1(bZIP)/colamp-TGA1-DAP-Seq(GSE60143)/Homer	TGACGTCAKC	1e-40	-93.14	0	905	0.0884	2203.1	0.0556
TGA6(bZIP)/colamp-TGA6-DAP-Seq(GSE60143)/Homer	TGACGTCABC	1e-39	-91.77	0	1178	0.1151	3075.1	0.0776
HLF(bZIP)/HSC-HLF.Flag-ChIP-Seq(GSE69817)/Homer	RTTATGYAAB	1e-38	-89.79	0	2331	0.2278	6992.1	0.1765
AT2G40260(G2like)/colamp-AT2G40260-DAP-Seq(GSE60143)/Homer	WAAAYATTCTTT	1e-38	-88.7	0	4555	0.4452	15124.1	0.3819
Gata6(Zf)/HUG1N-GATA6-ChIP-Seq(GSE51936)/Homer	YCTTATCTBN	1e-38	-88.42	0	2485	0.2429	7550	0.1906
ASHR1(ND)/col-ASHR1-DAP-Seq(GSE60143)/Homer	NTGGTGAN	1e-37	-87	0	2996	0.2928	9390.6	0.2371
At5g04390(C2H2)/col200-At5g04390-DAP-Seq(GSE60143)/Homer	AGTGANDN	1e-37	-86.5	0	9048	0.8843	33245.3	0.8394
Hoxb4(Homeobox)/ES-Hoxb4-ChIP-Seq(GSE34014)/Homer	TGATTRATGGCY	1e-37	-85.4	0	699	0.0683	1620.5	0.0409
AT2G38300(G2like)/col-AT2G38300-DAP-Seq(GSE60143)/Homer	ADRGAATGTT	1e-36	-83.46	0	4025	0.3934	13213	0.3336
GATA3(Zf)/iTreg-Gata3-ChIP-Seq(GSE20898)/Homer	AGATAASR	1e-35	-82.28	0	3753	0.3668	12219.1	0.3085
Gata4(Zf)/Heart-Gata4-ChIP-Seq(GSE35151)/Homer	NBWGATAAGR	1e-35	-80.87	0	2635	0.2575	8171.1	0.2063
Gata2(Zf)/K562-GATA2-ChIP-Seq(GSE18829)/Homer	BBCTTATCTS	1e-34	-79.71	0	1792	0.1751	5229.3	0.132
Tgif2(Homeobox)/mES-Tgif2-ChIP-Seq(GSE55404)/Homer	TGTCANYT	1e-34	-79.4	0	6514	0.6366	22846.7	0.5768
EHF(ETS)/LoVo-EHF-ChIP-Seq(GSE49402)/Homer	AVCAGGAAGT	1e-34	-79.19	0	2981	0.2913	9436.8	0.2383
STZ(C2H2)/colamp-STZ-DAP-Seq(GSE60143)/Homer	HNBTCACT	1e-34	-78.81	0	9101	0.8895	33569.5	0.8476
Ets1-distal(ETS)/CD4+-PolII-ChIP-Seq(Barski_et_al.)/Homer	MACAGGAAGT	1e-33	-77.66	0	826	0.0807	2056.7	0.0519
Gata1(Zf)/K562-GATA1-ChIP-Seq(GSE18829)/Homer	SAGATAAGRV	1e-33	-77.46	0	1595	0.1559	4579.6	0.1156
Elk1(ETS)/Hela-Elk1-ChIP-Seq(GSE31477)/Homer	HACTTCCGGY	1e-33	-77.15	0	981	0.0959	2550.5	0.0644
Nkx6.1(Homeobox)/Islet-Nkx6.1-ChIP-Seq(GSE40975)/Homer	GKTAATGR	1e-33	-76.93	0	6065	0.5927	21116	0.5331
NFAT:AP1(RHD,bZIP)/Jurkat-NFATC1-ChIP-Seq(Jolma_et_al.)/Homer	SARTGGAAAAWRTGAGTCAB	1e-33	-76.7	0	623	0.0609	1440.7	0.0364
Elf4(ETS)/BMDM-Elf4-ChIP-Seq(GSE88699)/Homer	ACTTCCKGKT	1e-32	-74.89	0	2200	0.215	6701.7	0.1692
ATHB33(ZFHD)/col-ATHB33-DAP-Seq(GSE60143)/Homer	NGTRATTAAK	1e-31	-73.36	0	3613	0.3531	11830.2	0.2987
ANAC038(NAC)/col-ANAC038-DAP-Seq(GSE60143)/Homer	ACACGTWAYC	1e-30	-71.11	0	4054	0.3962	13505.2	0.341
NFkB-p65-Rel(RHD)/ThioMac-LPS-Expression(GSE23622)/Homer	GGAAATTCCC	1e-30	-69.75	0	228	0.0223	370.1	0.0093
Ap4(bHLH)/AML-Tfap4-ChIP-Seq(GSE45738)/Homer	NAHCAGCTGD	1e-29	-68.63	0	2602	0.2543	8210.4	0.2073
TGA4(bZIP)/colamp-TGA4-DAP-Seq(GSE60143)/Homer	RTGACGTCAKCW	1e-29	-68.62	0	655	0.064	1584.5	0.04
EWS:FLI1-fusion(ETS)/SK_N_MC-EWS:FLI1-ChIP-Seq(SRA014231)/Homer	VACAGGAAAT	1e-29	-67.57	0	1330	0.13	3779	0.0954
At1g49010(MYBrelated)/col-At1g49010-DAP-Seq(GSE60143)/Homer	RGATAASNTT	1e-29	-66.99	0	4292	0.4195	14465.8	0.3652
KLF5(Zf)/LoVo-KLF5-ChIP-Seq(GSE49402)/Homer	DGGGYGKGGC	1e-28	-66.77	0	1965	0.192	5972.5	0.1508
KLF3(Zf)/MEF-Klf3-ChIP-Seq(GSE44748)/Homer	NRGCCCCRCCCHBNN	1e-28	-66.49	0	704	0.0688	1749.9	0.0442
CEBP:AP1(bZIP)/ThioMac-CEBPb-ChIP-Seq(GSE21512)/Homer	DRTGTTGCAA	1e-28	-66.39	0	2042	0.1996	6247.2	0.1577
TRPS1(Zf)/MCF7-TRPS1-ChIP-Seq(GSE107013)/Homer	AGATAAGANN	1e-27	-63.22	0	4710	0.4603	16112.1	0.4068
ATHB24(ZFHD)/colamp-ATHB24-DAP-Seq(GSE60143)/Homer	TAATTAAS	1e-27	-63.1	0	2227	0.2177	6943.3	0.1753
Elk4(ETS)/Hela-Elk4-ChIP-Seq(GSE31477)/Homer	NRYTTCCGGY	1e-27	-62.81	0	952	0.093	2568.5	0.0649
Stat3(Stat)/mES-Stat3-ChIP-Seq(GSE11431)/Homer	CTTCCGGGAA	1e-27	-62.37	0	1205	0.1178	3410	0.0861
Maz(Zf)/HepG2-Maz-ChIP-Seq(GSE31477)/Homer	GGGGGGGG	1e-25	-58.89	0	1872	0.183	5742.7	0.145
At3g11280(MYBrelated)/col-At3g11280-DAP-Seq(GSE60143)/Homer	GATAAGRT	1e-25	-58.56	0	2206	0.2156	6929.4	0.175
At5g05790(MYBrelated)/col-At5g05790-DAP-Seq(GSE60143)/Homer	AYCTTATC	1e-25	-58.45	0	2308	0.2256	7295.8	0.1842
Bcl6(Zf)/Liver-Bcl6-ChIP-Seq(GSE31578)/Homer	NNNCTTTCCAGGAAA	1e-25	-58.33	0	3273	0.3199	10807.6	0.2729
KAN2(G2like)/colamp-KAN2-DAP-Seq(GSE60143)/Homer	ATATTCTY	1e-24	-57.45	0	3747	0.3662	12581.5	0.3177
TGA5(bZIP)/col-TGA5-DAP-Seq(GSE60143)/Homer	NNGATGACGTCATCN	1e-24	-56.89	0	237	0.0232	432.5	0.0109
At5g08520(MYBrelated)/colamp-At5g08520-DAP-Seq(GSE60143)/Homer	ADBSTTATCY	1e-24	-56.82	0	2535	0.2478	8135.2	0.2054
ELF3(ETS)/PDAC-ELF3-ChIP-Seq(GSE64557)/Homer	ANCAGGAAGT	1e-24	-56.52	0	1802	0.1761	5526.5	0.1395
ELF1(ETS)/Jurkat-ELF1-ChIP-Seq(SRA014231)/Homer	AVCCGGAAGT	1e-24	-55.46	0	859	0.084	2326.7	0.0587
CRX(Homeobox)/Retina-Crx-ChIP-Seq(GSE20012)/Homer	GCTAATCC	1e-24	-55.44	0	4846	0.4736	16771.8	0.4235
Klf4(Zf)/mES-Klf4-ChIP-Seq(GSE11431)/Homer	GCCACACCCA	1e-23	-55.02	0	655	0.064	1674.9	0.0423
SPDEF(ETS)/VCaP-SPDEF-ChIP-Seq(SRA014231)/Homer	ASWTCCTGBT	1e-23	-54.66	0	2223	0.2173	7044.2	0.1779
PU.1(ETS)/ThioMac-PU.1-ChIP-Seq(GSE21512)/Homer	AGAGGAAGTG	1e-23	-54.41	0	1184	0.1157	3417.6	0.0863
TGA2(bZIP)/colamp-TGA2-DAP-Seq(GSE60143)/Homer	ACGTCAYCHH	1e-23	-53.32	0	969	0.0947	2707.2	0.0684
ATHB23(ZFHD)/col-ATHB23-DAP-Seq(GSE60143)/Homer	HTAATTARNN	1e-23	-53.02	0	2655	0.2595	8628.4	0.2179
PAX3:FKHR-fusion(Paired,Homeobox)/Rh4-PAX3:FKHR-ChIP-Seq(GSE19063)/Homer	ACCRTGACTAATTNN	1e-22	-52.29	0	650	0.0635	1678.6	0.0424
ELF5(ETS)/T47D-ELF5-ChIP-Seq(GSE30407)/Homer	ACVAGGAAGT	1e-22	-51.65	0	1739	0.17	5367.2	0.1355
NAP(NAC)/col-NAP-DAP-Seq(GSE60143)/Homer	ARGTTACGTRTN	1e-21	-50.44	0	1363	0.1332	4072.7	0.1028
ANAC046(NAC)/colamp-ANAC046-DAP-Seq(GSE60143)/Homer	ACACGYWAYC	1e-21	-50.12	0	3644	0.3561	12326.1	0.3112
Nanog(Homeobox)/mES-Nanog-ChIP-Seq(GSE11724)/Homer	RGCCATTAAC	1e-21	-49.83	0	7584	0.7412	27643.4	0.698
ETS(ETS)/Promoter/Homer	AACCGGAAGT	1e-21	-49.73	0	571	0.0558	1447.5	0.0365
ATAF1(NAC)/col-ATAF1-DAP-Seq(GSE60143)/Homer	YACGTMAY	1e-21	-49.73	0	3145	0.3074	10479.8	0.2646
Lhx3(Homeobox)/Neuron-Lhx3-ChIP-Seq(GSE31456)/Homer	ADBTAATTAR	1e-21	-49.31	0	4317	0.4219	14874.6	0.3756
HuR(?)/HEK293-HuR-CLIP-Seq(GSE87887)/Homer	BTTTGGTTTG	1e-21	-49.31	0	7057	0.6897	25533.6	0.6447
Stat3+il21(Stat)/CD4-Stat3-ChIP-Seq(GSE19198)/Homer	SVYTTCCNGGAARB	1e-21	-49.22	0	1650	0.1613	5086.7	0.1284
TGA10(bZIP)/colamp-TGA10-DAP-Seq(GSE60143)/Homer	ATGACGTC	1e-21	-48.49	0	1208	0.1181	3562.4	0.0899
ATHB34(ZFHD)/colamp-ATHB34-DAP-Seq(GSE60143)/Homer	TRATTARS	1e-20	-48.09	0	2307	0.2255	7444.6	0.188
At5g58900(MYBrelated)/colamp-At5g58900-DAP-Seq(GSE60143)/Homer	WWWTYTTATCTWWWW	1e-20	-47.59	0	3830	0.3743	13070	0.33
Tgif1(Homeobox)/mES-Tgif1-ChIP-Seq(GSE55404)/Homer	YTGWCADY	1e-20	-47.45	0	6099	0.5961	21780.1	0.5499
ATHB25(ZFHD)/colamp-ATHB25-DAP-Seq(GSE60143)/Homer	TAATTAVB	1e-20	-47.37	0	3235	0.3162	10854.8	0.2741
bZIP52(bZIP)/colamp-bZIP52-DAP-Seq(GSE60143)/Homer	NDNHCAGCTGTCANN	1e-20	-46.89	0	2977	0.2909	9909.6	0.2502
Six2(Homeobox)/NephronProgenitor-Six2-ChIP-Seq(GSE39837)/Homer	GWAAYHTGAKMC	1e-19	-45.52	0	2301	0.2249	7463.6	0.1884
Six1(Homeobox)/Myoblast-Six1-ChIP-Chip(GSE20150)/Homer	GKVTCADRTTWC	1e-19	-45.43	0	693	0.0677	1870.2	0.0472
SeqBias: CA-repeat	CACACACACA	1e-19	-45.33	0	7941	0.7761	29180	0.7368
AT3G25990(Trihelix)/colamp-AT3G25990-DAP-Seq(GSE60143)/Homer	TTAACCATAG	1e-19	-44.76	0	1723	0.1684	5404.1	0.1364
LXH9(Homeobox)/Hct116-LXH9.V5-ChIP-Seq(GSE116822)/Homer	NGCTAATTAG	1e-19	-44.46	0	3691	0.3607	12609.1	0.3184
Tcf21(bHLH)/ArterySmoothMuscle-Tcf21-ChIP-Seq(GSE61369)/Homer	NAACAGCTGG	1e-19	-44	0	2011	0.1965	6442.9	0.1627
Sp2(Zf)/HEK293-Sp2.eGFP-ChIP-Seq(Encode)/Homer	YGGCCCCGCCCC	1e-19	-43.84	0	2187	0.2137	7078.4	0.1787
bZIP18(bZIP)/colamp-bZIP18-DAP-Seq(GSE60143)/Homer	KGMCAGCTND	1e-19	-43.81	0	7955	0.7775	29265.3	0.7389
NFkB-p65(RHD)/GM12787-p65-ChIP-Seq(GSE19485)/Homer	WGGGGATTTCCC	1e-19	-43.76	0	1198	0.1171	3582.8	0.0905
AT5G60130(ABI3VP1)/col-AT5G60130-DAP-Seq(GSE60143)/Homer	WTTYTAAGVAAA	1e-18	-43.11	0	4808	0.4699	16872	0.426
KLF6(Zf)/PDAC-KLF6-ChIP-Seq(GSE64557)/Homer	MKGGGYGTGGCC	1e-18	-43.07	0	1564	0.1529	4866	0.1229
Arnt:Ahr(bHLH)/MCF7-Arnt-ChIP-Seq(Lo_et_al.)/Homer	TBGCACGCAA	1e-18	-42.32	0	1099	0.1074	3259.3	0.0823
SCL(bHLH)/HPC7-Scl-ChIP-Seq(GSE13511)/Homer	AVCAGCTG	1e-18	-42.22	0	7134	0.6972	25984.3	0.6561
NAM(NAC)/col-NAM-DAP-Seq(GSE60143)/Homer	RGTTRCGTRW	1e-18	-42.18	0	1550	0.1515	4829.8	0.1219
TGA3(bZIP)/colamp-TGA3-DAP-Seq(GSE60143)/Homer	WTGATGACGTCATCW	1e-18	-41.49	0	146	0.0143	248.7	0.0063
Rfx6(HTH)/Min6b1-Rfx6.HA-ChIP-Seq(GSE62844)/Homer	TGTTKCCTAGCAACM	1e-17	-41.18	0	2105	0.2057	6825.5	0.1723
AT5G56840(MYBrelated)/colamp-AT5G56840-DAP-Seq(GSE60143)/Homer	TGGATAAGGT	1e-17	-40.71	0	3062	0.2993	10337.7	0.261
Smad3(MAD)/NPC-Smad3-ChIP-Seq(GSE36673)/Homer	TWGTCTGV	1e-17	-40.48	0	5057	0.4942	17884.4	0.4516
AT5G61620(MYBrelated)/colamp-AT5G61620-DAP-Seq(GSE60143)/Homer	CTTATCCA	1e-17	-40.36	0	3269	0.3195	11113.2	0.2806
ETS:RUNX(ETS,Runt)/Jurkat-RUNX1-ChIP-Seq(GSE17954)/Homer	RCAGGATGTGGT	1e-17	-40.34	0	232	0.0227	482.4	0.0122
Pitx1(Homeobox)/Chicken-Pitx1-ChIP-Seq(GSE38910)/Homer	TAATCCCN	1e-17	-39.95	0	7479	0.7309	27415.8	0.6922
Replumless(BLH)/Arabidopsis-RPL.GFP-ChIP-Seq(GSE78727)/Homer	HGTCWHATCA	1e-16	-39.1	0	2453	0.2397	8125.8	0.2052
EKLF(Zf)/Erythrocyte-Klf1-ChIP-Seq(GSE20478)/Homer	NWGGGTGTGGCY	1e-16	-38.81	0	423	0.0413	1060.6	0.0268
HOXA9(Homeobox)/HSC-Hoxa9-ChIP-Seq(GSE33509)/Homer	GGCCATAAATCA	1e-16	-38.53	0	1853	0.1811	5961.2	0.1505
AT2G31460(REMB3)/col-AT2G31460-DAP-Seq(GSE60143)/Homer	WNWARWDGAAATGAT	1e-16	-38.34	0	1112	0.1087	3351.8	0.0846
Hoxc9(Homeobox)/Ainv15-Hoxc9-ChIP-Seq(GSE21812)/Homer	GGCCATAAATCA	1e-16	-38.31	0	1490	0.1456	4672.6	0.118
HIC1(Zf)/Treg-ZBTB29-ChIP-Seq(GSE99889)/Homer	TGCCAGCB	1e-16	-38.31	0	3787	0.3701	13096.8	0.3307
Atf4(bZIP)/MEF-Atf4-ChIP-Seq(GSE35681)/Homer	MTGATGCAAT	1e-16	-38.24	0	828	0.0809	2384.3	0.0602
HAT2(Homeobox)/colamp-HAT2-DAP-Seq(GSE60143)/Homer	CYAATSATTR	1e-16	-37.57	0	2374	0.232	7864.5	0.1986
Sp5(Zf)/mES-Sp5.Flag-ChIP-Seq(GSE72989)/Homer	RGKGGGCGGAGC	1e-15	-36.83	0	1315	0.1285	4077.9	0.103
TGA9(bZIP)/colamp-TGA9-DAP-Seq(GSE60143)/Homer	VTGACGTC	1e-15	-36.7	0	2400	0.2346	7975	0.2014
COUP-TFII(NR)/K562-NR2F1-ChIP-Seq(Encode)/Homer	GKBCARAGGTCA	1e-15	-36.17	0	2765	0.2702	9327.8	0.2355
MyoG(bHLH)/C2C12-MyoG-ChIP-Seq(GSE36024)/Homer	AACAGCTG	1e-15	-35.64	0	2119	0.2071	6970.9	0.176
AZF1(C2H2)/colamp-AZF1-DAP-Seq(GSE60143)/Homer	DKSWCACT	1e-15	-35.59	0	8425	0.8234	31352	0.7916
Tbx5(T-box)/HL1-Tbx5.biotin-ChIP-Seq(GSE21529)/Homer	AGGTGTCA	1e-15	-35.39	0	5733	0.5603	20618.2	0.5206
At5g47390(MYBrelated)/col-At5g47390-DAP-Seq(GSE60143)/Homer	CTTATCCA	1e-15	-34.79	0	2891	0.2825	9821.5	0.248
MyoD(bHLH)/Myotube-MyoD-ChIP-Seq(GSE21614)/Homer	RRCAGCTGYTSY	1e-15	-34.57	0	1529	0.1494	4866.1	0.1229
STAT4(Stat)/CD4-Stat4-ChIP-Seq(GSE22104)/Homer	NYTTCCWGGAAR	1e-14	-34.41	0	2371	0.2317	7912.9	0.1998
Isl1(Homeobox)/Neuron-Isl1-ChIP-Seq(GSE31456)/Homer	CTAATKGV	1e-14	-34.25	0	4373	0.4274	15408.3	0.389
GLIS3(Zf)/Thyroid-Glis3.GFP-ChIP-Seq(GSE103297)/Homer	CTCCCTGGGAGGCCN	1e-14	-33.94	0	2437	0.2382	8163.3	0.2061
Reverb(NR),DR2/RAW-Reverba.biotin-ChIP-Seq(GSE45914)/Homer	GTRGGTCASTGGGTCA	1e-14	-33.84	0	321	0.0314	778.4	0.0197
SeqBias: GA-repeat	GAGAGAGAGA	1e-14	-33.79	0	9024	0.8819	33876.5	0.8553
AT1G76870(Trihelix)/col-AT1G76870-DAP-Seq(GSE60143)/Homer	AAAACCRGWW	1e-14	-33.74	0	967	0.0945	2908.5	0.0734
Hoxa13(Homeobox)/ChickenMSG-Hoxa13.Flag-ChIP-Seq(GSE86088)/Homer	CYHATAAAAN	1e-14	-33.58	0	5625	0.5497	20242.5	0.5111
Lhx2(Homeobox)/HFSC-Lhx2-ChIP-Seq(GSE48068)/Homer	TAATTAGN	1e-14	-33.34	0	2909	0.2843	9918.3	0.2504
KLF14(Zf)/HEK293-KLF14.GFP-ChIP-Seq(GSE58341)/Homer	RGKGGGCGKGGC	1e-14	-33.32	0	2344	0.2291	7835	0.1978
COUP-TFII(NR)/Artia-Nr2f2-ChIP-Seq(GSE46497)/Homer	AGRGGTCA	1e-14	-33.3	0	3158	0.3086	10846.8	0.2739
Rbpj1(?)/Panc1-Rbpj1-ChIP-Seq(GSE47459)/Homer	HTTTCCCASG	1e-14	-32.54	0	3134	0.3063	10773.2	0.272
ELT-3(Gata)/cElegans-L1-ELT3-ChIP-Seq(modEncode)/Homer	AWTGATAAGA	1e-13	-32.23	0	1277	0.1248	4009.9	0.1012
MYB33(MYB)/col-MYB33-DAP-Seq(GSE60143)/Homer	DDTYNGTTAN	1e-13	-31.86	0	4001	0.391	14051.8	0.3548
EAR2(NR)/K562-NR2F6-ChIP-Seq(Encode)/Homer	NRBCARRGGTCA	1e-13	-31.83	0	2537	0.2479	8573.3	0.2165
Zfp281(Zf)/ES-Zfp281-ChIP-Seq(GSE81042)/Homer	CCCCTCCCCCAC	1e-13	-31.04	0	292	0.0285	707.7	0.0179
PU.1-IRF(ETS:IRF)/Bcell-PU.1-ChIP-Seq(GSE21512)/Homer	MGGAAGTGAAAC	1e-13	-30.76	0	2855	0.279	9773.1	0.2468
PSE(SNAPc)/K562-mStart-Seq/Homer	WAVTCACCMTAASYDAAAAG	1e-13	-30.68	0	1327	0.1297	4210	0.1063
Tcf12(bHLH)/GM12878-Tcf12-ChIP-Seq(GSE32465)/Homer	VCAGCTGYTG	1e-13	-30.6	0	1918	0.1875	6332.4	0.1599
ATHB15(HB)/col-ATHB15-DAP-Seq(GSE60143)/Homer	GYAATSATTA	1e-13	-30.58	0	988	0.0966	3021.6	0.0763
WRKY55(WRKY)/col-WRKY55-DAP-Seq(GSE60143)/Homer	NCGTTGACTT	1e-13	-30.53	0	2360	0.2306	7948.2	0.2007
AT5G05550(Trihelix)/col-AT5G05550-DAP-Seq(GSE60143)/Homer	HDNHDTCKCCGGMGA	1e-13	-30.1	0	1862	0.182	6138.2	0.155
Tal1	CATCTG	1e-13	-30.08	0	3112	0.3041	10746.1	0.2713
CDX4(Homeobox)/ZebrafishEmbryos-Cdx4.Myc-ChIP-Seq(GSE48254)/Homer	NGYCATAAAWCH	1e-13	-30.08	0	2324	0.2271	7825.8	0.1976
GSC(Homeobox)/FrogEmbryos-GSC-ChIP-Seq(DRA000576)/Homer	RGGATTAR	1e-13	-30.05	0	2687	0.2626	9165.8	0.2314
X-box(HTH)/NPC-H3K4me1-ChIP-Seq(GSE16256)/Homer	GGTTGCCATGGCAA	1e-13	-30	0	281	0.0275	680.9	0.0172
PQM-1(?)/cElegans-L3-ChIP-Seq(modEncode)/Homer	ACTGATAAGA	1e-12	-29.89	0	1068	0.1044	3309.1	0.0836
MYB101(MYB)/colamp-MYB101-DAP-Seq(GSE60143)/Homer	TAACNRMY	1e-12	-29.49	0	4047	0.3955	14284.2	0.3607
Chop(bZIP)/MEF-Chop-ChIP-Seq(GSE35681)/Homer	ATTGCATCAT	1e-12	-29.48	0	644	0.0629	1858.8	0.0469
NF1:FOXA1(CTF,Forkhead)/LNCAP-FOXA1-ChIP-Seq(GSE27824)/Homer	WNTGTTTRYTTTGGCA	1e-12	-29.37	0	184	0.018	396.2	0.01
Dorsal(RHD)/Embryo-dl-ChIP-Seq(GSE65441)/Homer	GGGAAAAMCCCG	1e-12	-28.97	0	456	0.0446	1241.5	0.0313
GAGA-repeat/SacCer-Promoters/Homer	CTYTCTYTCTCTCTC	1e-12	-28.44	0	7279	0.7114	26879	0.6787
WRKY18(WRKY)/col-WRKY18-DAP-Seq(GSE60143)/Homer	NNNTTGACYWNNNNN	1e-12	-28.37	0	3210	0.3137	11153.9	0.2816
ATY13(MYB)/col-ATY13-DAP-Seq(GSE60143)/Homer	YYYAACYRHH	1e-12	-28.33	0	5847	0.5714	21241.7	0.5363
OCT:OCT-short(POU,Homeobox)/NPC-OCT6-ChIP-Seq(GSE43916)/Homer	ATGCATWATGCATRW	1e-12	-28.29	0	2159	0.211	7256.3	0.1832
Unknown2/Drosophila-Promoters/Homer	CATCMCTA	1e-12	-28.14	0	2609	0.255	8918.9	0.2252
MYB70(MYB)/col-MYB70-DAP-Seq(GSE60143)/Homer	WTAACNGTTA	1e-12	-28.12	0	3394	0.3317	11850.4	0.2992
Rfx1(HTH)/NPC-H3K4me1-ChIP-Seq(GSE16256)/Homer	KGTTGCCATGGCAA	1e-12	-27.96	0	441	0.0431	1201.7	0.0303
ATHB6(Homeobox)/col-ATHB6-DAP-Seq(GSE60143)/Homer	AATGATTG	1e-12	-27.88	0	3461	0.3383	12108.1	0.3057
ZNF416(Zf)/HEK293-ZNF416.GFP-ChIP-Seq(GSE58341)/Homer	WDNCTGGGCA	1e-12	-27.71	0	2611	0.2552	8935.9	0.2256
ANAC047(NAC)/colamp-ANAC047-DAP-Seq(GSE60143)/Homer	WACACGTAACTT	1e-11	-27.6	0	1005	0.0982	3121.7	0.0788
STAT1(Stat)/HelaS3-STAT1-ChIP-Seq(GSE12782)/Homer	NATTTCCNGGAAAT	1e-11	-27.35	0	788	0.077	2372.1	0.0599
BHLHA15(bHLH)/NIH3T3-BHLHB8.HA-ChIP-Seq(GSE119782)/Homer	NAMCAGCTGK	1e-11	-27.3	0	2842	0.2778	9803.4	0.2475
CRE(bZIP)/Promoter/Homer	CSGTGACGTCAC	1e-11	-27.25	0	385	0.0376	1026.8	0.0259
MYB(HTH)/ERMYB-Myb-ChIPSeq(GSE22095)/Homer	GGCVGTTR	1e-11	-27.22	0	3412	0.3335	11941	0.3015
Hoxd13(Homeobox)/ChickenMSG-Hoxd13.Flag-ChIP-Seq(GSE86088)/Homer	NCYAATAAAA	1e-11	-26.99	0	3959	0.3869	14014.8	0.3539
KLF10(Zf)/HEK293-KLF10.GFP-ChIP-Seq(GSE58341)/Homer	GGGGGTGTGTCC	1e-11	-26.66	0	902	0.0882	2775.2	0.0701
Hoxa9(Homeobox)/ChickenMSG-Hoxa9.Flag-ChIP-Seq(GSE86088)/Homer	RGCAATNAAA	1e-11	-25.96	0	5746	0.5616	20913.5	0.528
Myf5(bHLH)/GM-Myf5-ChIP-Seq(GSE24852)/Homer	BAACAGCTGT	1e-11	-25.84	0	1434	0.1401	4671.4	0.1179
Hoxa11(Homeobox)/ChickenMSG-Hoxa11.Flag-ChIP-Seq(GSE86088)/Homer	TTTTATGGCM	1e-11	-25.65	0	5266	0.5147	19060.9	0.4813
Rfx5(HTH)/GM12878-Rfx5-ChIP-Seq(GSE31477)/Homer	SCCTAGCAACAG	1e-10	-25.18	0	634	0.062	1872.5	0.0473
Gfi1b(Zf)/HPC7-Gfi1b-ChIP-Seq(GSE22178)/Homer	MAATCACTGC	1e-10	-25.15	0	1482	0.1448	4856.1	0.1226
E-box/Drosophila-Promoters/Homer	AACAGCTGTTHN	1e-10	-25.13	0	564	0.0551	1636.2	0.0413
Klf9(Zf)/GBM-Klf9-ChIP-Seq(GSE62211)/Homer	GCCACRCCCACY	1e-10	-25.07	0	480	0.0469	1356.6	0.0343
PHV(HB)/col-PHV-DAP-Seq(GSE60143)/Homer	RTAATSATTA	1e-10	-24.91	0	1210	0.1183	3886.3	0.0981
MYB73(MYB)/col-MYB73-DAP-Seq(GSE60143)/Homer	NNNNHAACNGHHDHN	1e-10	-24.22	0	4253	0.4157	15209.4	0.384
AtGRF6(GRF)/col-AtGRF6-DAP-Seq(GSE60143)/Homer	NTGTCAGADNNNNNN	1e-10	-24.04	0	2398	0.2344	8230.3	0.2078
AMYB(HTH)/Testes-AMYB-ChIP-Seq(GSE44588)/Homer	TGGCAGTTGG	1e-10	-23.8	0	3033	0.2964	10603.9	0.2677
WRKY75(WRKY)/col-WRKY75-DAP-Seq(GSE60143)/Homer	CGTTGACTWW	1e-10	-23.58	0	1924	0.188	6494.5	0.164
Pax8(Paired,Homeobox)/Thyroid-Pax8-ChIP-Seq(GSE26938)/Homer	GTCATGCHTGRCTGS	1e-10	-23.52	0	620	0.0606	1844.4	0.0466
WRKY28(WRKY)/col-WRKY28-DAP-Seq(GSE60143)/Homer	BGTTGACTWH	1e-10	-23.44	0	2595	0.2536	8976.8	0.2267
RARa(NR)/K562-RARa-ChIP-Seq(Encode)/Homer	TTGAMCTTTG	1e-10	-23.31	0	5069	0.4954	18367.5	0.4638
Twist2(bHLH)/Myoblast-Twist2.Ty1-ChIP-Seq(GSE127998)/Homer	MCAGCTGBYH	1e-10	-23.25	0	3432	0.3354	12119.5	0.306
HLH-1(bHLH)/cElegans-Embryo-HLH1-ChIP-Seq(modEncode)/Homer	RACAGCTGTTBH	1e-10	-23.04	0	1697	0.1659	5676.7	0.1433
Rfx2(HTH)/LoVo-RFX2-ChIP-Seq(GSE49402)/Homer	GTTGCCATGGCAACM	1e-09	-22.99	0	194	0.019	459.5	0.0116
WRKY25(WRKY)/colamp-WRKY25-DAP-Seq(GSE60143)/Homer	NNNNHRGTCAAMNNN	1e-09	-22.92	0	2322	0.2269	7975.9	0.2014
Erra(NR)/HepG2-Erra-ChIP-Seq(GSE31477)/Homer	CAAAGGTCAG	1e-09	-22.68	0	3796	0.371	13513.8	0.3412
HOXB13(Homeobox)/ProstateTumor-HOXB13-ChIP-Seq(GSE56288)/Homer	TTTTATKRGG	1e-09	-22.46	0	2636	0.2576	9153.5	0.2311
Tbet(T-box)/CD8-Tbet-ChIP-Seq(GSE33802)/Homer	AGGTGTGAAM	1e-09	-22.45	0	2472	0.2416	8543.9	0.2157
Lhx1(Homeobox)/EmbryoCarcinoma-Lhx1-ChIP-Seq(GSE70957)/Homer	NNYTAATTAR	1e-09	-22.41	0	3024	0.2955	10606.5	0.2678
TCF4(bHLH)/SHSY5Y-TCF4-ChIP-Seq(GSE96915)/Homer	SMCATCTGKH	1e-09	-22.31	0	3059	0.299	10740.5	0.2712
Atoh1(bHLH)/Cerebellum-Atoh1-ChIP-Seq(GSE22111)/Homer	VNRVCAGCTGGY	1e-09	-22.3	0	2238	0.2187	7679.7	0.1939
AP-2alpha(AP2)/Hela-AP2alpha-ChIP-Seq(GSE31477)/Homer	ATGCCCTGAGGC	1e-09	-22.16	0	1456	0.1423	4819.3	0.1217
PPARE(NR),DR1/3T3L1-Pparg-ChIP-Seq(GSE13511)/Homer	TGACCTTTGCCCCA	1e-09	-21.98	0	1949	0.1905	6621.6	0.1672
RFX(HTH)/K562-RFX3-ChIP-Seq(SRA012198)/Homer	CGGTTGCCATGGCAAC	1e-09	-21.92	0	157	0.0153	355.6	0.009
HIF-1b(HLH)/T47D-HIF1b-ChIP-Seq(GSE59937)/Homer	RTACGTGC	1e-09	-21.54	0	1719	0.168	5789	0.1462
Olig2(bHLH)/Neuron-Olig2-ChIP-Seq(GSE30882)/Homer	RCCATMTGTT	1e-09	-21.46	0	3888	0.38	13898.1	0.3509
THRb(NR)/Liver-NR1A2-ChIP-Seq(GSE52613)/Homer	TRAGGTCA	1e-09	-21.3	0	6461	0.6315	23845.9	0.6021
RXR(NR),DR1/3T3L1-RXR-ChIP-Seq(GSE13511)/Homer	TAGGGCAAAGGTCA	1e-09	-21.17	0	2229	0.2178	7673.3	0.1937
SeqBias: TA-repeat	TATATATATA	1e-09	-21.11	0	6172	0.6032	22719.7	0.5736
Initiator/Drosophila-Promoters/Homer	NTCAGTYG	1e-09	-21.05	0	4688	0.4582	16969.1	0.4284
MafF(bZIP)/HepG2-MafF-ChIP-Seq(GSE31477)/Homer	HWWGTCAGCAWWTTT	1e-09	-21.04	0	845	0.0826	2657.9	0.0671
WRKY15(WRKY)/col-WRKY15-DAP-Seq(GSE60143)/Homer	VGTTGACTWW	1e-09	-20.99	0	1942	0.1898	6618.2	0.1671
Hoxd11(Homeobox)/ChickenMSG-Hoxd11.Flag-ChIP-Seq(GSE86088)/Homer	VGCCATAAAA	1e-09	-20.96	0	5343	0.5222	19499	0.4923
ZNF467(Zf)/HEK293-ZNF467.GFP-ChIP-Seq(GSE58341)/Homer	TGGGGAAGGGCM	1e-08	-20.71	0	1499	0.1465	5004.7	0.1264
RAP211(AP2EREBP)/colamp-RAP211-DAP-Seq(GSE60143)/Homer	RGCCGGCYWW	1e-08	-20.7	0	2422	0.2367	8401.2	0.2121
AP-2gamma(AP2)/MCF7-TFAP2C-ChIP-Seq(GSE21234)/Homer	SCCTSAGGSCAW	1e-08	-20.66	0	1845	0.1803	6269.8	0.1583
AARE(HLH)/mES-cMyc-ChIP-Seq/Homer	GATTGCATCA	1e-08	-20.32	0	266	0.026	701.9	0.0177
CArG(MADS)/PUER-Srf-ChIP-Seq(Sullivan_et_al.)/Homer	CCATATATGGNM	1e-08	-20.31	0	727	0.0711	2255.6	0.057
RORgt(NR)/EL4-RORgt.Flag-ChIP-Seq(GSE56019)/Homer	AAYTAGGTCA	1e-08	-20.27	0	341	0.0333	944.2	0.0238
RORgt(NR)/EL4-RORgt.Flag-ChIP-Seq(GSE56019)/Homer	AAYTAGGTCA	1e-08	-20.27	0	341	0.0333	944.2	0.0238
NeuroG2(bHLH)/Fibroblast-NeuroG2-ChIP-Seq(GSE75910)/Homer	ACCATCTGTT	1e-08	-20.22	0	3109	0.3039	10986.3	0.2774
MYB65(MYB)/colamp-MYB65-DAP-Seq(GSE60143)/Homer	RACNGTTA	1e-08	-19.42	0	2450	0.2394	8540	0.2156
GRF9(GRF)/colamp-GRF9-DAP-Seq(GSE60143)/Homer	NWCTGACANNNNNNN	1e-08	-19.2	0	2125	0.2077	7337.3	0.1853
MYB118(MYB)/colamp-MYB118-DAP-Seq(GSE60143)/Homer	TAWCCGTTAC	1e-08	-19.19	0	577	0.0564	1751.3	0.0442
At3g60580(C2H2)/col-At3g60580-DAP-Seq(GSE60143)/Homer	WTTYTACT	1e-08	-19.17	0	8502	0.8309	32037.8	0.8089
O2(bZIP)/Corn-O2-ChIP-Seq(GSE63991)/Homer	GCTGACGTGGCA	1e-08	-19.11	0	297	0.029	812	0.0205
Bcl11a(Zf)/HSPC-BCL11A-ChIP-Seq(GSE104676)/Homer	TYTGACCASWRG	1e-08	-18.82	0	1508	0.1474	5077.3	0.1282
HOXA2(Homeobox)/mES-Hoxa2-ChIP-Seq(Donaldson_et_al.)/Homer	GYCATCMATCAT	1e-08	-18.56	0	305	0.0298	842.4	0.0213
TF3A(C2H2)/col-TF3A-DAP-Seq(GSE60143)/Homer	NNDDGAGGAGGWNNN	1e-08	-18.48	0	2773	0.271	9773.6	0.2468
MYB81(MYB)/col-MYB81-DAP-Seq(GSE60143)/Homer	NWAACSGWTWNN	1e-07	-18.37	0	3243	0.3169	11546.1	0.2915
PAX5(Paired,Homeobox)/GM12878-PAX5-ChIP-Seq(GSE32465)/Homer	GCAGCCAAGCRTGACH	1e-07	-18.34	0	672	0.0657	2093	0.0528
Zic(Zf)/Cerebellum-ZIC1.2-ChIP-Seq(GSE60731)/Homer	CCTGCTGAGH	1e-07	-18.32	0	1563	0.1528	5289.6	0.1336
p63(p53)/Keratinocyte-p63-ChIP-Seq(GSE17611)/Homer	NNDRCATGYCYNRRCATGYH	1e-07	-18.28	0	635	0.0621	1964.5	0.0496
Srebp1a(bHLH)/HepG2-Srebp1a-ChIP-Seq(GSE31477)/Homer	RTCACSCCAY	1e-07	-18.19	0	474	0.0463	1411.7	0.0356
GATA(Zf),IR3/iTreg-Gata3-ChIP-Seq(GSE20898)/Homer	NNNNNBAGATAWYATCTVHN	1e-07	-18.14	0	429	0.0419	1259.1	0.0318
ATHB6(Homeobox)/Arabidopsis-HB6-ChIP-Seq(GSE80564)/Homer	CAATNATTBN	1e-07	-18.12	0	2148	0.2099	7450.9	0.1881
MYB98(MYB)/col-MYB98-DAP-Seq(GSE60143)/Homer	NWDCCGTTAC	1e-07	-18.09	0	542	0.053	1645.2	0.0415
Hoxd10(Homeobox)/ChickenMSG-Hoxd10.Flag-ChIP-Seq(GSE86088)/Homer	GGCMATGAAA	1e-07	-18.03	0	2860	0.2795	10113.1	0.2553
bZIP42(bZIP)/colamp-bZIP42-DAP-Seq(GSE60143)/Homer	GCCACGTCAGCA	1e-07	-17.91	0	16	0.0016	10.7	0.0003
WRKY71(WRKY)/col-WRKY71-DAP-Seq(GSE60143)/Homer	CKTTGACYWW	1e-07	-17.74	0	1555	0.152	5273.8	0.1332
NeuroD1(bHLH)/Islet-NeuroD1-ChIP-Seq(GSE30298)/Homer	GCCATCTGTT	1e-07	-17.66	0	1696	0.1658	5792.7	0.1463
Zic3(Zf)/mES-Zic3-ChIP-Seq(GSE37889)/Homer	GGCCYCCTGCTGDGH	1e-07	-17.49	0	1125	0.1099	3716.1	0.0938
Ascl1(bHLH)/NeuralTubes-Ascl1-ChIP-Seq(GSE55840)/Homer	NNVVCAGCTGBN	1e-07	-17.41	0	2912	0.2846	10327.7	0.2608
HIF2a(bHLH)/785_O-HIF2a-ChIP-Seq(GSE34871)/Homer	GCACGTACCC	1e-07	-17.37	0	591	0.0578	1824.5	0.0461
ERF15(AP2EREBP)/colamp-ERF15-DAP-Seq(GSE60143)/Homer	WDHAGCMGCCAT	1e-07	-17.33	0	2683	0.2622	9469.8	0.2391
WRKY6(WRKY)/colamp-WRKY6-DAP-Seq(GSE60143)/Homer	NCGTTGACTWWD	1e-07	-17.24	0	1734	0.1695	5942.6	0.15
Foxh1(Forkhead)/hESC-FOXH1-ChIP-Seq(GSE29422)/Homer	NNTGTGGATTSS	1e-07	-17.07	0	1480	0.1446	5014.8	0.1266
Cdx2(Homeobox)/mES-Cdx2-ChIP-Seq(GSE14586)/Homer	GYMATAAAAH	1e-07	-17	0	1859	0.1817	6409.5	0.1618
IRF8(IRF)/BMDM-IRF8-ChIP-Seq(GSE77884)/Homer	GRAASTGAAAST	1e-07	-16.77	0	748	0.0731	2383.8	0.0602
ZNF322(Zf)/HEK293-ZNF322.GFP-ChIP-Seq(GSE58341)/Homer	GAGCCTGGTACTGWGCCTGR	1e-07	-16.66	0	576	0.0563	1782.3	0.045
Knotted(Homeobox)/Corn-KN1-ChIP-Seq(GSE39161)/Homer	GAYGNGACRGGN	1e-07	-16.65	0	2509	0.2452	8837	0.2231
TOD6?/SacCer-Promoters/Homer	GCGATGAGMT	1e-07	-16.62	0	358	0.035	1037.9	0.0262
MYB105(MYB)/colamp-MYB105-DAP-Seq(GSE60143)/Homer	RATWCCGTTA	1e-07	-16.57	0	1412	0.138	4777.8	0.1206
Unknown-ESC-element(?)/mES-Nanog-ChIP-Seq(GSE11724)/Homer	CACAGCAGGGGG	1e-07	-16.5	0	1217	0.1189	4069.4	0.1027
TR4(NR),DR1/Hela-TR4-ChIP-Seq(GSE24685)/Homer	GAGGTCAAAGGTCA	1e-07	-16.35	0	255	0.0249	699.6	0.0177
Smad2(MAD)/ES-SMAD2-ChIP-Seq(GSE29422)/Homer	CTGTCTGG	1e-07	-16.34	0	2702	0.2641	9571	0.2417
Meis1(Homeobox)/MastCells-Meis1-ChIP-Seq(GSE48085)/Homer	VGCTGWCAVB	1e-07	-16.29	0	3242	0.3168	11608.3	0.2931
WRKY31(WRKY)/colamp-WRKY31-DAP-Seq(GSE60143)/Homer	NCGTTGACTWWK	1e-07	-16.25	0	1416	0.1384	4799.3	0.1212
SUT1?/SacCer-Promoters/Homer	CCCCGCGC	1e-07	-16.21	0	6476	0.6329	24072.1	0.6078
AT5G47660(Trihelix)/colamp-AT5G47660-DAP-Seq(GSE60143)/Homer	AWTTTTACCG	1e-06	-16.02	0	3516	0.3436	12656.9	0.3196
Unknown3/Arabidopsis-Promoters/Homer	AYTAAACCGG	1e-06	-15.97	0	215	0.021	573.5	0.0145
STAT5(Stat)/mCD4+-Stat5-ChIP-Seq(GSE12346)/Homer	RTTTCTNAGAAA	1e-06	-15.91	0	845	0.0826	2742.8	0.0693
PPARa(NR),DR1/Liver-Ppara-ChIP-Seq(GSE47954)/Homer	VNAGGKCAAAGGTCA	1e-06	-15.8	0	2132	0.2084	7454.2	0.1882
caudal(Homeobox)/Drosophila-Embryos-ChIP-Chip(modEncode)/Homer	GGYCATAAAW	1e-06	-15.71	0	2055	0.2008	7170.9	0.1811
MYB119(MYB)/colamp-MYB119-DAP-Seq(GSE60143)/Homer	YRACCGTTACDD	1e-06	-15.68	0	565	0.0552	1758.1	0.0444
LXRE(NR),DR4/RAW-LXRb.biotin-ChIP-Seq(GSE21512)/Homer	RGGTTACTANAGGTCA	1e-06	-15.43	0	119	0.0116	278.2	0.007
BMYB(HTH)/Hela-BMYB-ChIP-Seq(GSE27030)/Homer	NHAACBGYYV	1e-06	-15.37	0	2984	0.2916	10663.6	0.2692
STAT6(Stat)/Macrophage-Stat6-ChIP-Seq(GSE38377)/Homer	TTCCKNAGAA	1e-06	-15.36	0	1390	0.1358	4725.7	0.1193
IRF1(IRF)/PBMC-IRF1-ChIP-Seq(GSE43036)/Homer	GAAAGTGAAAGT	1e-06	-15.26	0	355	0.0347	1042.9	0.0263
GT2(Trihelix)/colamp-GT2-DAP-Seq(GSE60143)/Homer	AMGGTAAAWWWN	1e-06	-14.63	0	2861	0.2796	10223.9	0.2581
LBD18(LOBAS2)/colamp-LBD18-DAP-Seq(GSE60143)/Homer	CKGAWWTTCHGS	1e-06	-14.59	0	4817	0.4708	17687.8	0.4466
Ptf1a(bHLH)/Panc1-Ptf1a-ChIP-Seq(GSE47459)/Homer	ACAGCTGTTN	1e-06	-14.51	0	4605	0.4501	16874.9	0.4261
Hoxa10(Homeobox)/ChickenMSG-Hoxa10.Flag-ChIP-Seq(GSE86088)/Homer	GGYAATGAAA	1e-06	-14.38	0	1581	0.1545	5451.7	0.1376
bZIP:IRF(bZIP,IRF)/Th17-BatF-ChIP-Seq(GSE39756)/Homer	NAGTTTCABTHTGACTNW	1e-06	-14.34	0	1139	0.1113	3833.1	0.0968
ZFX(Zf)/mES-Zfx-ChIP-Seq(GSE11431)/Homer	AGGCCTRG	1e-06	-14.32	0	2254	0.2203	7953.1	0.2008
PRDM1(Zf)/Hela-PRDM1-ChIP-Seq(GSE31477)/Homer	ACTTTCACTTTC	1e-06	-14.22	0	1335	0.1305	4551	0.1149
STAT6(Stat)/CD4-Stat6-ChIP-Seq(GSE22104)/Homer	ABTTCYYRRGAA	1e-06	-14.19	0	1409	0.1377	4823	0.1218
MYB77(MYB)/col-MYB77-DAP-Seq(GSE60143)/Homer	NYAACBGYMC	1e-06	-14.17	0	2478	0.2422	8797.3	0.2221
ANAC079(NAC)/colamp-ANAC079-DAP-Seq(GSE60143)/Homer	TACACGCAACCT	1e-06	-14.13	0	680	0.0665	2187.9	0.0552
WRKY29(WRKY)/colamp-WRKY29-DAP-Seq(GSE60143)/Homer	MGTTGACTTT	1e-06	-14.11	0	2082	0.2035	7317.8	0.1848
Smad4(MAD)/ESC-SMAD4-ChIP-Seq(GSE29422)/Homer	VBSYGTCTGG	1e-06	-14.04	0	2653	0.2593	9459.1	0.2388
IRF:BATF(IRF:bZIP)/pDC-Irf8-ChIP-Seq(GSE66899)/Homer	CTTTCANTATGACTV	1e-06	-13.96	0	349	0.0341	1037.6	0.0262
WRKY33(WRKY)/col-WRKY33-DAP-Seq(GSE60143)/Homer	CGTTGACYAW	1e-05	-13.61	0	1502	0.1468	5180	0.1308
WRKY42(WRKY)/colamp-WRKY42-DAP-Seq(GSE60143)/Homer	NAAAGTCAACGN	1e-05	-13.55	0	667	0.0652	2151.1	0.0543
HOXD13(Homeobox)/Chicken-Hoxd13-ChIP-Seq(GSE38910)/Homer	NCYAATAAAA	1e-05	-13.53	0	2748	0.2686	9834.1	0.2483
NLP7(RWPRK)/col-NLP7-DAP-Seq(GSE60143)/Homer	TGRCCYTTCR	1e-05	-13.52	0	3619	0.3537	13137.7	0.3317
Unknown(Homeobox)/Limb-p300-ChIP-Seq/Homer	SSCMATWAAA	1e-05	-13.48	0	1621	0.1584	5623.1	0.142
AT5G23930(mTERF)/col-AT5G23930-DAP-Seq(GSE60143)/Homer	GGCGGCTG	1e-05	-13.47	0	1791	0.175	6253.6	0.1579
Zfp809(Zf)/ES-Zfp809-ChIP-Seq(GSE70799)/Homer	GGGGCTYGKCTGGGA	1e-05	-13.4	0	392	0.0383	1192	0.0301
PAX5(Paired,Homeobox),condensed/GM12878-PAX5-ChIP-Seq(GSE32465)/Homer	GTCACGCTCSCTGM	1e-05	-13.2	0	207	0.0202	571.4	0.0144
Bapx1(Homeobox)/VertebralCol-Bapx1-ChIP-Seq(GSE36672)/Homer	TTRAGTGSYK	1e-05	-12.86	0	3989	0.3899	14575.3	0.368
AT5G25475(ABI3VP1)/col-AT5G25475-DAP-Seq(GSE60143)/Homer	RNNRNCAAGCADNDB	1e-05	-12.73	0	2324	0.2271	8266.3	0.2087
VIP1(bZIP)/col-VIP1-DAP-Seq(GSE60143)/Homer	NTTGACAGCTGTCAN	1e-05	-12.72	0	394	0.0385	1208	0.0305
Unknown5/Drosophila-Promoters/Homer	GCTGATAASV	1e-05	-12.7	0	1260	0.1231	4314.2	0.1089
bZIP3(bZIP)/col-bZIP3-DAP-Seq(GSE60143)/Homer	DWKNHSACGTGGCAD	1e-05	-12.7	0	848	0.0829	2815.1	0.0711
bcd(Homeobox)/Embryo-Bcd-ChIP-Seq(GSE86966)/Homer	VNNGGATTADNN	1e-05	-12.69	0	2424	0.2369	8643.5	0.2182
CELF2(RRM)/JSL1-CELF2-CLIP-Seq(GSE71264)/Homer	RGTGTCAG	1e-05	-12.66	0	718	0.0702	2349.9	0.0593
Six4(Homeobox)/MCF7-SIX4-ChIP-Seq(Encode)/Homer	TGWAAYCTGABACCB	1e-05	-12.52	0	137	0.0134	352.1	0.0089
RORg(NR)/Liver-Rorc-ChIP-Seq(GSE101115)/Homer	WAABTAGGTCAV	1e-05	-12.4	0	232	0.0227	661.3	0.0167
EBF1(EBF)/Near-E2A-ChIP-Seq(GSE21512)/Homer	GTCCCCWGGGGA	1e-05	-12.31	0	1935	0.1891	6824.2	0.1723
bHLH80(bHLH)/col-bHLH80-DAP-Seq(GSE60143)/Homer	NNNNDCAASTTGHNN	1e-05	-12.21	0	1828	0.1787	6428.2	0.1623
TBP3(MYBrelated)/col-TBP3-DAP-Seq(GSE60143)/Homer	VYTAGGGCAN	1e-05	-12.05	0	1518	0.1484	5282.5	0.1334
RAR:RXR(NR),DR5/ES-RAR-ChIP-Seq(GSE56893)/Homer	RGGTCADNNAGAGGTCAV	1e-05	-12.01	0	83	0.0081	190.3	0.0048
Sp1(Zf)/Promoter/Homer	GGCCCCGCCCCC	1e-05	-11.98	0	176	0.0172	481.7	0.0122
HY5(bZIP)/colamp-HY5-DAP-Seq(GSE60143)/Homer	RRTSACGTSD	1e-05	-11.96	0	1042	0.1018	3535.8	0.0893
MYB62(MYB)/colamp-MYB62-DAP-Seq(GSE60143)/Homer	NTACCTAACT	1e-05	-11.95	0	2493	0.2436	8928.5	0.2254
AT3G42860(zfGRF)/col-AT3G42860-DAP-Seq(GSE60143)/Homer	CGTTGACTTN	1e-05	-11.92	0	497	0.0486	1578.3	0.0398
WRKY47(WRKY)/colamp-WRKY47-DAP-Seq(GSE60143)/Homer	WAAGTCAACGBT	1e-05	-11.88	0	519	0.0507	1656.9	0.0418
Nkx3.1(Homeobox)/LNCaP-Nkx3.1-ChIP-Seq(GSE28264)/Homer	AAGCACTTAA	1e-05	-11.84	0	4379	0.428	16112.9	0.4068
Dlx3(Homeobox)/Kerainocytes-Dlx3-ChIP-Seq(GSE89884)/Homer	NDGTAATTAC	1e-05	-11.82	0	1895	0.1852	6690.6	0.1689
SeqBias: CG bias	SSSSSSSSSS	1e-05	-11.78	0	7680	0.7506	28981.6	0.7317
EGL-5(Homeobox)/cElegans-L3-EGL5-ChIP-Seq(modEncode)/Homer	ATTTAATGGG	1e-05	-11.75	0	3564	0.3483	12996.2	0.3281
ZBTB18(Zf)/HEK293-ZBTB18.GFP-ChIP-Seq(GSE58341)/Homer	AACATCTGGA	1e-05	-11.72	0	999	0.0976	3384.1	0.0854
ZNF711(Zf)/SHSY5Y-ZNF711-ChIP-Seq(GSE20673)/Homer	AGGCCTAG	1e-05	-11.69	0	2761	0.2698	9949.2	0.2512
bHLH122(bHLH)/col100-bHLH122-DAP-Seq(GSE60143)/Homer	NDDCAASTTGHHNWW	1e-05	-11.6	0	1572	0.1536	5495.1	0.1387
GATA3(Zf),DR8/iTreg-Gata3-ChIP-Seq(GSE20898)/Homer	AGATSTNDNNDSAGATAASN	1e-05	-11.57	0	202	0.0197	571	0.0144
WRKY27(WRKY)/colamp-WRKY27-DAP-Seq(GSE60143)/Homer	NHGTTGACYTWD	0.0001	-11.34	0	1848	0.1806	6530.7	0.1649
AT1G72740(MYBrelated)/colamp-AT1G72740-DAP-Seq(GSE60143)/Homer	NNWWAMCCTAAHWNN	0.0001	-11.26	0	2130	0.2082	7588.4	0.1916
PRDM10(Zf)/HEK293-PRDM10.eGFP-ChIP-Seq(Encode)/Homer	TGGTACATTCCA	0.0001	-11.19	0	1240	0.1212	4280.2	0.1081
Mef2b(MADS)/HEK293-Mef2b.V5-ChIP-Seq(GSE67450)/Homer	GCTATTTTTGGM	0.0001	-11.19	0	2001	0.1956	7107.9	0.1795
MITF(bHLH)/MastCells-MITF-ChIP-Seq(GSE48085)/Homer	RTCATGTGAC	0.0001	-10.99	0	1677	0.1639	5904.8	0.1491
Mef2c(MADS)/GM12878-Mef2c-ChIP-Seq(GSE32465)/Homer	DCYAAAAATAGM	0.0001	-10.98	0	1125	0.1099	3863.3	0.0975
E2F6(E2F)/Hela-E2F6-ChIP-Seq(GSE31477)/Homer	GGCGGGAARN	0.0001	-10.95	0	570	0.0557	1853.2	0.0468
AIL7(AP2EREBP)/colamp-AIL7-DAP-Seq(GSE60143)/Homer	KCACRAWTYYCGAGG	0.0001	-10.93	0	817	0.0798	2741.9	0.0692
AT1G24250(Orphan)/col-AT1G24250-DAP-Seq(GSE60143)/Homer	KTDGTTGGTDGTTGG	0.0001	-10.92	0	632	0.0618	2075.6	0.0524
HNF1b(Homeobox)/PDAC-HNF1B-ChIP-Seq(GSE64557)/Homer	GTTAATNATTAA	0.0001	-10.9	0.0001	465	0.0454	1482.2	0.0374
REM19(REM)/colamp-REM19-DAP-Seq(GSE60143)/Homer	AAAAAAAA	0.0001	-10.86	0.0001	1728	0.1689	6098.8	0.154
At1g25550(G2like)/colamp-At1g25550-DAP-Seq(GSE60143)/Homer	NAGATTCY	0.0001	-10.69	0.0001	2664	0.2604	9620.1	0.2429
PABPC1(?)/MEL-PABC1-CLIP-Seq(GSE69755)/Homer	HAATAAAGNN	0.0001	-10.66	0.0001	4496	0.4394	16614	0.4195
THRa(NR)/C17.2-THRa-ChIP-Seq(GSE38347)/Homer	GGTCANYTGAGGWCA	0.0001	-10.57	0.0001	770	0.0753	2579.4	0.0651
At1g19000(MYBrelated)/colamp-At1g19000-DAP-Seq(GSE60143)/Homer	WWTGGATAADDT	0.0001	-10.52	0.0001	2073	0.2026	7400	0.1868
GBF5(bZIP)/colamp-GBF5-DAP-Seq(GSE60143)/Homer	WKNWSACGTGGCAWN	0.0001	-10.51	0.0001	505	0.0494	1630.2	0.0412
At3g12730(G2like)/colamp-At3g12730-DAP-Seq(GSE60143)/Homer	AAGATTCT	0.0001	-10.51	0.0001	3557	0.3476	13021.5	0.3288
GTL1(Trihelix)/colamp-GTL1-DAP-Seq(GSE60143)/Homer	WWTTTACCKY	0.0001	-10.43	0.0001	2744	0.2682	9933.9	0.2508
VRN1(ABI3VP1)/col-VRN1-DAP-Seq(GSE60143)/Homer	TTTTTTTTTT	0.0001	-10.37	0.0001	482	0.0471	1551.4	0.0392
AT1G49560(G2like)/colamp-AT1G49560-DAP-Seq(GSE60143)/Homer	GAWTCTNWDA	0.0001	-10.37	0.0001	3096	0.3026	11271.3	0.2846
MYB56(MYB)/colamp-MYB56-DAP-Seq(GSE60143)/Homer	HTAACGRMHY	0.0001	-10.35	0.0001	1595	0.1559	5619.9	0.1419
Tbx20(T-box)/Heart-Tbx20-ChIP-Seq(GSE29636)/Homer	GGTGYTGACAGS	0.0001	-10.26	0.0001	484	0.0473	1560.6	0.0394
AT3G58630(Trihelix)/col-AT3G58630-DAP-Seq(GSE60143)/Homer	TCTCCGGCGA	0.0001	-10.2	0.0001	122	0.0119	322.5	0.0081
GBF3(bZIP)/Arabidopsis-GBF3-ChIP-Seq(GSE80564)/Homer	TGCCACGTSAYC	0.0001	-10.18	0.0001	764	0.0747	2566.3	0.0648
WRKY30(WRKY)/colamp-WRKY30-DAP-Seq(GSE60143)/Homer	CGTTGACTTN	0.0001	-10.05	0.0001	517	0.0505	1681.9	0.0425
WT1(Zf)/Kidney-WT1-ChIP-Seq(GSE90016)/Homer	MCTCCCMCRCAB	0.0001	-9.873	0.0001	937	0.0916	3203.3	0.0809
RBFox2(?)/Heart-RBFox2-CLIP-Seq(GSE57926)/Homer	TGCATGCA	0.0001	-9.856	0.0001	4005	0.3914	14764.5	0.3728
At5g08750(C3H)/col-At5g08750-DAP-Seq(GSE60143)/Homer	NWDTTGCGGCTR	0.0001	-9.777	0.0001	515	0.0503	1679.6	0.0424
ZNF264(Zf)/HEK293-ZNF264.GFP-ChIP-Seq(GSE58341)/Homer	RGGGCACTAACY	0.0001	-9.72	0.0002	1167	0.1141	4052.5	0.1023
EBF2(EBF)/BrownAdipose-EBF2-ChIP-Seq(GSE97114)/Homer	NABTCCCWDGGGAVH	0.0001	-9.57	0.0002	1829	0.1788	6519	0.1646
IRF2(IRF)/Erythroblas-IRF2-ChIP-Seq(GSE36985)/Homer	GAAASYGAAASY	0.0001	-9.498	0.0002	241	0.0236	724.8	0.0183
HOXA1(Homeobox)/mES-Hoxa1-ChIP-Seq(SRP084292)/Homer	TGATKGATGR	0.0001	-9.495	0.0002	678	0.0663	2270.6	0.0573
ATHB20(Homeobox)/colamp-ATHB20-DAP-Seq(GSE60143)/Homer	CAATHATT	0.0001	-9.442	0.0002	1256	0.1228	4390	0.1108
Hoxd12(Homeobox)/ChickenMSG-Hoxd12.Flag-ChIP-Seq(GSE86088)/Homer	HDGYAATGAAAN	0.0001	-9.378	0.0002	4223	0.4127	15623.4	0.3945
ARF2(ARF)/col-ARF2-DAP-Seq(GSE60143)/Homer	TTGTCGGMWN	0.001	-9.172	0.0003	4535	0.4432	16833.7	0.425
ATHB7(Homeobox)/col-ATHB7-DAP-Seq(GSE60143)/Homer	AATGATTG	0.001	-9.094	0.0003	1910	0.1867	6840.1	0.1727
ERE(NR),IR3/MCF7-ERa-ChIP-Seq(Unpublished)/Homer	VAGGTCACNSTGACC	0.001	-9.007	0.0003	491	0.048	1608.3	0.0406
NFkB-p50,p52(RHD)/Monocyte-p50-ChIP-Chip(Schreiber_et_al.)/Homer	GGGGGAATCCCC	0.001	-8.984	0.0003	195	0.0191	574.8	0.0145
OBP3(C2C2dof)/col-OBP3-DAP-Seq(GSE60143)/Homer	NYWACTTTTT	0.001	-8.943	0.0003	6359	0.6215	23915.3	0.6038
At1g74840(MYBrelated)/col100-At1g74840-DAP-Seq(GSE60143)/Homer	YHTTATCCAWWT	0.001	-8.857	0.0004	1877	0.1834	6725.8	0.1698
Mef2a(MADS)/HL1-Mef2a.biotin-ChIP-Seq(GSE21529)/Homer	CYAAAAATAG	0.001	-8.844	0.0004	1046	0.1022	3631.8	0.0917
GATA(Zf),IR4/iTreg-Gata3-ChIP-Seq(GSE20898)/Homer	NAGATWNBNATCTNN	0.001	-8.772	0.0004	231	0.0226	699.9	0.0177
EBF(EBF)/proBcell-EBF-ChIP-Seq(GSE21978)/Homer	DGTCCCYRGGGA	0.001	-8.748	0.0004	429	0.0419	1392.7	0.0352
RORa(NR)/Liver-Rora-ChIP-Seq(GSE101115)/Homer	AAWCTAGGTCARDNN	0.001	-8.722	0.0004	320	0.0313	1008.9	0.0255
Hand2(bHLH)/Mesoderm-Hand2-ChIP-Seq(GSE61475)/Homer	TGACANARRCCAGRC	0.001	-8.652	0.0004	997	0.0974	3456.5	0.0873
AT4G37180(G2like)/col-AT4G37180-DAP-Seq(GSE60143)/Homer	AGAATCTTNN	0.001	-8.565	0.0005	2946	0.2879	10780	0.2722
Eomes(T-box)/H9-Eomes-ChIP-Seq(GSE26097)/Homer	ATTAACACCT	0.001	-8.563	0.0005	4457	0.4356	16563.8	0.4182
WRKY22(WRKY)/colamp-WRKY22-DAP-Seq(GSE60143)/Homer	WWAAAGTCAACK	0.001	-8.499	0.0005	1226	0.1198	4307.4	0.1088
At5g18450(AP2EREBP)/col-At5g18450-DAP-Seq(GSE60143)/Homer	CACCGCTT	0.001	-8.432	0.0005	1393	0.1361	4930.3	0.1245
bZIP69(bZIP)/col-bZIP69-DAP-Seq(GSE60143)/Homer	GACAGCTGKCAW	0.001	-8.364	0.0006	246	0.024	756.5	0.0191
ATHB5(HB)/colamp-ATHB5-DAP-Seq(GSE60143)/Homer	AATGATTG	0.001	-8.273	0.0006	2619	0.256	9550.8	0.2411
LBD19(LOBAS2)/colamp-LBD19-DAP-Seq(GSE60143)/Homer	CCKGAAWTTCMGGAW	0.001	-8.264	0.0006	3411	0.3334	12566.8	0.3173
WRKY26(WRKY)/colamp-WRKY26-DAP-Seq(GSE60143)/Homer	CGTTGACTWDKN	0.001	-8.214	0.0007	999	0.0976	3476.6	0.0878
WRKY24(WRKY)/colamp-WRKY24-DAP-Seq(GSE60143)/Homer	CGTTGACTWW	0.001	-8.206	0.0007	1678	0.164	6003.3	0.1516
PU.1:IRF8(ETS:IRF)/pDC-Irf8-ChIP-Seq(GSE66899)/Homer	GGAAGTGAAAST	0.001	-8.2	0.0007	448	0.0438	1470.6	0.0371
E2A(bHLH)/proBcell-E2A-ChIP-Seq(GSE21978)/Homer	DNRCAGCTGY	0.001	-8.192	0.0007	2622	0.2563	9565.5	0.2415
BOS1(MYB)/col-BOS1-DAP-Seq(GSE60143)/Homer	NNRCCTAACT	0.001	-8.159	0.0007	1681	0.1643	6016.5	0.1519
E2F3(E2F)/MEF-E2F3-ChIP-Seq(GSE71376)/Homer	BTKGGCGGGAAA	0.001	-8.122	0.0007	623	0.0609	2102.6	0.0531
PLT3(AP2EREBP)/col-PLT3-DAP-Seq(GSE60143)/Homer	GCACGNWTHYCGAGG	0.001	-8.048	0.0008	85	0.0083	221.9	0.0056
At3g24120(G2like)/col-At3g24120-DAP-Seq(GSE60143)/Homer	NWWAGMATMW	0.001	-8.02	0.0008	6491	0.6344	24477.2	0.618
SVP(MADS)/col-SVP-DAP-Seq(GSE60143)/Homer	ANTTWCCHAATTTGG	0.001	-7.866	0.0009	1410	0.1378	5013.7	0.1266
MYB30(MYB)/colamp-MYB30-DAP-Seq(GSE60143)/Homer	AGGTAGTTGG	0.001	-7.841	0.0009	2025	0.1979	7322.1	0.1849
MYB113(MYB)/col-MYB113-DAP-Seq(GSE60143)/Homer	HNDAWTCMGTTAYWN	0.001	-7.814	0.001	1402	0.137	4985.6	0.1259
IDD4(C2H2)/col-IDD4-DAP-Seq(GSE60143)/Homer	TTTGTCTTTWTB	0.001	-7.81	0.001	2057	0.201	7444.1	0.188
Barx1(Homeobox)/Stomach-Barx1.3xFlag-ChIP-Seq(GSE69483)/Homer	AAACMATTAN	0.001	-7.702	0.0011	1302	0.1272	4616.3	0.1166
WRKY65(WRKY)/colamp-WRKY65-DAP-Seq(GSE60143)/Homer	AWWWAGTCAACG	0.001	-7.643	0.0011	983	0.0961	3434.9	0.0867
THRb(NR)/HepG2-THRb.Flag-ChIP-Seq(Encode)/Homer	GGTCACCTGAGGTCA	0.001	-7.614	0.0012	1019	0.0996	3568.2	0.0901
GAGA-repeat/Arabidopsis-Promoters/Homer	CTCTCTCTCY	0.001	-7.485	0.0013	2321	0.2268	8456.9	0.2135
At3g04030(G2like)/col-At3g04030-DAP-Seq(GSE60143)/Homer	DRGAATCT	0.001	-7.466	0.0013	2396	0.2342	8741.9	0.2207
ETS:E-box(ETS,bHLH)/HPC7-Scl-ChIP-Seq(GSE22178)/Homer	AGGAARCAGCTG	0.001	-7.396	0.0014	201	0.0196	614.4	0.0155
AT5G45580(G2like)/colamp-AT5G45580-DAP-Seq(GSE60143)/Homer	ADRGAATCTH	0.001	-7.371	0.0015	3762	0.3677	13955.2	0.3523
MYB49(MYB)/col-MYB49-DAP-Seq(GSE60143)/Homer	ARKTAGGTRR	0.001	-7.359	0.0015	2153	0.2104	7826.2	0.1976
ISRE(IRF)/ThioMac-LPS-Expression(GSE23622)/Homer	AGTTTCASTTTC	0.001	-7.284	0.0016	146	0.0143	428.7	0.0108
RLR1?/SacCer-Promoters/Homer	WTTTTCYYTTTT	0.001	-7.222	0.0017	1557	0.1522	5587.3	0.1411
AT1G47655(C2C2dof)/colamp-AT1G47655-DAP-Seq(GSE60143)/Homer	YHACTTTTTS	0.001	-7.191	0.0017	6828	0.6673	25838	0.6524
At5g62940(C2C2dof)/col-At5g62940-DAP-Seq(GSE60143)/Homer	WHWHHACTTTTT	0.001	-7.141	0.0018	6769	0.6616	25610.8	0.6466
RAV1(RAV)/colamp-RAV1-DAP-Seq(GSE60143)/Homer	TWWTTTCTGTTG	0.001	-7.118	0.0019	1751	0.1711	6320.4	0.1596
PLT1(AP2EREBP)/colamp-PLT1-DAP-Seq(GSE60143)/Homer	GCACGAWTYCCGAGG	0.001	-7.084	0.0019	110	0.0108	311	0.0079
AT3G12130(C3H)/colamp-AT3G12130-DAP-Seq(GSE60143)/Homer	TMACTTTTTV	0.001	-7.046	0.002	5272	0.5152	19792.2	0.4997
ASL18(LOBAS2)/colamp-ASL18-DAP-Seq(GSE60143)/Homer	CCGGAAAWTCMGGAR	0.001	-7.045	0.002	2748	0.2686	10098.2	0.255
SeqBias: A/T bias	WWWWWWWWWW	0.001	-7	0.0021	9877	0.9653	37994	0.9593
Pit1+1bp(Homeobox)/GCrat-Pit1-ChIP-Seq(GSE58009)/Homer	ATGCATAATTCA	0.001	-6.913	0.0023	1055	0.1031	3724.1	0.094
bZIP44(bZIP)/colamp-bZIP44-DAP-Seq(GSE60143)/Homer	NDTGCCACGTCAGCH	0.01	-6.898	0.0023	50	0.0049	120.9	0.0031
Pitx1:Ebox(Homeobox,bHLH)/Hindlimb-Pitx1-ChIP-Seq(GSE41591)/Homer	YTAATTRAWWCCAGATGT	0.01	-6.897	0.0023	531	0.0519	1797.1	0.0454
IRF3(IRF)/BMDM-Irf3-ChIP-Seq(GSE67343)/Homer	AGTTTCAKTTTC	0.01	-6.808	0.0025	737	0.072	2552.1	0.0644
NFAT(RHD)/Jurkat-NFATC1-ChIP-Seq(Jolma_et_al.)/Homer	ATTTTCCATT	0.01	-6.769	0.0026	2166	0.2117	7902.4	0.1995
WRKY14(WRKY)/colamp-WRKY14-DAP-Seq(GSE60143)/Homer	NCGTTGACTTTN	0.01	-6.736	0.0027	999	0.0976	3522.8	0.0889
ZNF143|STAF(Zf)/CUTLL-ZNF143-ChIP-Seq(GSE29600)/Homer	ATTTCCCAGVAKSCY	0.01	-6.66	0.0029	606	0.0592	2076.7	0.0524
At2g33710(AP2EREBP)/colamp-At2g33710-DAP-Seq(GSE60143)/Homer	WTKGCGGCKR	0.01	-6.659	0.0029	1398	0.1366	5013.1	0.1266
SpiB(ETS)/OCILY3-SPIB-ChIP-Seq(GSE56857)/Homer	AAAGRGGAAGTG	0.01	-6.654	0.0029	506	0.0495	1712.1	0.0432
MYB83(MYB)/colamp-MYB83-DAP-Seq(GSE60143)/Homer	CACCAACCWH	0.01	-6.642	0.0029	3222	0.3149	11927.7	0.3012
ATHB13(Homeobox)/col-ATHB13-DAP-Seq(GSE60143)/Homer	CAATAATT	0.01	-6.639	0.0029	3078	0.3008	11377.5	0.2873
Otx2(Homeobox)/EpiLC-Otx2-ChIP-Seq(GSE56098)/Homer	NYTAATCCYB	0.01	-6.622	0.003	1691	0.1653	6116	0.1544
EMB1789(C3H)/col-EMB1789-DAP-Seq(GSE60143)/Homer	TWTTTACCGYND	0.01	-6.608	0.003	938	0.0917	3300.2	0.0833
Mef2d(MADS)/Retina-Mef2d-ChIP-Seq(GSE61391)/Homer	GCTATTTTTAGC	0.01	-6.579	0.0031	476	0.0465	1605.9	0.0405
Znf263(Zf)/K562-Znf263-ChIP-Seq(GSE31477)/Homer	CVGTSCTCCC	0.01	-6.542	0.0032	3008	0.294	11115.5	0.2807
ZNF519(Zf)/HEK293-ZNF519.GFP-ChIP-Seq(GSE58341)/Homer	GAGSCCGAGC	0.01	-6.535	0.0032	300	0.0293	974.6	0.0246
AT4G00250(GeBP)/col-AT4G00250-DAP-Seq(GSE60143)/Homer	WDTGGATAAKRT	0.01	-6.458	0.0035	1362	0.1331	4886.2	0.1234
ANAC045(NAC)/col-ANAC045-DAP-Seq(GSE60143)/Homer	DNCKTVNNNNNNAMG	0.01	-6.395	0.0037	3248	0.3174	12040	0.304
ZNF652/HepG2-ZNF652.Flag-ChIP-Seq(Encode)/Homer	TTAACCCTTTVNKKN	0.01	-6.336	0.0039	590	0.0577	2026.5	0.0512
AT1G69570(C2C2dof)/col-AT1G69570-DAP-Seq(GSE60143)/Homer	WAAAAGTGHH	0.01	-6.299	0.004	3031	0.2962	11216.8	0.2832
DEL2(E2FDP)/col-DEL2-DAP-Seq(GSE60143)/Homer	WTTTCSCGCC	0.01	-6.282	0.0041	436	0.0426	1467.7	0.0371
Tcfcp2l1(CP2)/mES-Tcfcp2l1-ChIP-Seq(GSE11431)/Homer	NRAACCRGTTYRAACCRGYT	0.01	-6.271	0.0041	245	0.0239	784.1	0.0198
E2F1(E2F)/Hela-E2F1-ChIP-Seq(GSE22478)/Homer	CWGGCGGGAA	0.01	-6.252	0.0042	182	0.0178	564.9	0.0143
Zac1(Zf)/Neuro2A-Plagl1-ChIP-Seq(GSE75942)/Homer	HAWGRGGCCM	0.01	-6.207	0.0044	4358	0.4259	16312.4	0.4119
CEBP:CEBP(bZIP)/MEF-Chop-ChIP-Seq(GSE35681)/Homer	NTNATGCAAYMNNHTGMAAY	0.01	-6.168	0.0045	371	0.0363	1235.5	0.0312
Egr1(Zf)/K562-Egr1-ChIP-Seq(GSE32465)/Homer	TGCGTGGGYG	0.01	-6.137	0.0047	878	0.0858	3093.7	0.0781
Trl(Zf)/S2-GAGAfactor-ChIP-Seq(GSE40646)/Homer	RGAGAGAG	0.01	-6.105	0.0048	4594	0.449	17228.6	0.435
HIF-1a(bHLH)/MCF7-HIF1a-ChIP-Seq(GSE28352)/Homer	TACGTGCV	0.01	-6.047	0.0051	385	0.0376	1288.8	0.0325
HEB(bHLH)/mES-Heb-ChIP-Seq(GSE53233)/Homer	VCAGCTGBNN	0.01	-6.019	0.0052	3331	0.3255	12379.3	0.3126
bHLH130(bHLH)/col-bHLH130-DAP-Seq(GSE60143)/Homer	GCAACTTG	0.01	-5.962	0.0055	1262	0.1233	4531.6	0.1144
AGL63(MADS)/col-AGL63-DAP-Seq(GSE60143)/Homer	TTCCAAWWWTGG	0.01	-5.955	0.0055	2039	0.1993	7460.8	0.1884
MYB41(MYB)/col-MYB41-DAP-Seq(GSE60143)/Homer	BYTYACCTAA	0.01	-5.92	0.0057	715	0.0699	2497.1	0.063
ZNF189(Zf)/HEK293-ZNF189.GFP-ChIP-Seq(GSE58341)/Homer	TGGAACAGMA	0.01	-5.873	0.006	1561	0.1526	5658.9	0.1429
WRKY40(WRKY)/colamp-WRKY40-DAP-Seq(GSE60143)/Homer	AHWAGTCAAC	0.01	-5.832	0.0062	1123	0.1098	4016.6	0.1014
TCX2(CPP)/colamp-TCX2-DAP-Seq(GSE60143)/Homer	NNWWTTYRAAHN	0.01	-5.83	0.0062	3730	0.3645	13920.3	0.3515
PAX6(Paired,Homeobox)/Forebrain-Pax6-ChIP-Seq(GSE66961)/Homer	NGTGTTCAVTSAAGCGKAAA	0.01	-5.829	0.0062	190	0.0186	598.6	0.0151
HAT1(Homeobox)/col-HAT1-DAP-Seq(GSE60143)/Homer	SCAATCATTGNN	0.01	-5.827	0.0062	476	0.0465	1623	0.041
ZNF7(Zf)/HepG2-ZNF7.Flag-ChIP-Seq(Encode)/Homer	CTGCCWVCTTTTRTA	0.01	-5.793	0.0064	1144	0.1118	4096.1	0.1034
WRKY20(WRKY)/col-WRKY20-DAP-Seq(GSE60143)/Homer	CKTTGACYWD	0.01	-5.749	0.0067	1411	0.1379	5100	0.1288
E2F4(E2F)/K562-E2F4-ChIP-Seq(GSE31477)/Homer	GGCGGGAAAH	0.01	-5.744	0.0067	351	0.0343	1172.3	0.0296
bZIP53(bZIP)/colamp-bZIP53-DAP-Seq(GSE60143)/Homer	NDNHSACGTGKMNNN	0.01	-5.742	0.0067	416	0.0407	1407.6	0.0355
IRF4(IRF)/GM12878-IRF4-ChIP-Seq(GSE32465)/Homer	ACTGAAACCA	0.01	-5.738	0.0067	929	0.0908	3296.7	0.0832
AT3G57600(AP2EREBP)/col-AT3G57600-DAP-Seq(GSE60143)/Homer	GGCGGTGG	0.01	-5.717	0.0069	498	0.0487	1706.4	0.0431
Tbr1(T-box)/Cortex-Tbr1-ChIP-Seq(GSE71384)/Homer	AAGGTGTKAA	0.01	-5.717	0.0069	2941	0.2874	10905.9	0.2754
NFY(CCAAT)/Promoter/Homer	RGCCAATSRG	0.01	-5.692	0.007	1459	0.1426	5282	0.1334
Adof1(C2C2dof)/col-Adof1-DAP-Seq(GSE60143)/Homer	NRWAAAGYDV	0.01	-5.645	0.0073	5833	0.5701	22053.4	0.5568
ZNF669(Zf)/HEK293-ZNF669.GFP-ChIP-Seq(GSE58341)/Homer	GARTGGTCATCGCCC	0.01	-5.618	0.0075	127	0.0124	383.6	0.0097
TAGL1(MADS)/Tomato-TAGL1-ChIP-Seq(GSE116581)/Homer	CCAAAAATRG	0.01	-5.538	0.0081	2563	0.2505	9473.3	0.2392
ZIM(C2C2gata)/col-ZIM-DAP-Seq(GSE60143)/Homer	ATCSRACGGTYRAGA	0.01	-5.531	0.0082	15	0.0015	26.3	0.0007
FXR(NR),IR1/Liver-FXR-ChIP-Seq(Chong_et_al.)/Homer	AGGTCANTGACCTB	0.01	-5.419	0.0091	744	0.0727	2620.4	0.0662
IBL1(bHLH)/Seedling-IBL1-ChIP-Seq(GSE51120)/Homer	CACGTGCC	0.01	-5.418	0.0091	2328	0.2275	8585.9	0.2168
dof45(C2C2dof)/col-dof45-DAP-Seq(GSE60143)/Homer	NVAWAAAGTN	0.01	-5.417	0.0091	5598	0.5471	21156.5	0.5342
Brachyury(T-box)/Mesoendoderm-Brachyury-ChIP-exo(GSE54963)/Homer	ANTTMRCASBNNNGTGYKAAN	0.01	-5.399	0.0092	556	0.0543	1927.7	0.0487
At2g01060(G2like)/colamp-At2g01060-DAP-Seq(GSE60143)/Homer	AGATKCBNWW	0.01	-5.366	0.0095	6337	0.6193	24031.4	0.6068
GATA:SCL(Zf,bHLH)/Ter119-SCL-ChIP-Seq(GSE18720)/Homer	CRGCTGBNGNSNNSAGATAA	0.01	-5.336	0.0098	230	0.0225	747.4	0.0189
At1g19210(AP2EREBP)/colamp-At1g19210-DAP-Seq(GSE60143)/Homer	HCACCGACCAHN	0.01	-5.292	0.0102	1027	0.1004	3678.5	0.0929
ERF13(AP2EREBP)/colamp-ERF13-DAP-Seq(GSE60143)/Homer	TYAGCCGCCATT	0.01	-5.28	0.0103	972	0.095	3473.9	0.0877
bZIP16(bZIP)/colamp-bZIP16-DAP-Seq(GSE60143)/Homer	TGCCACGTGD	0.01	-5.271	0.0104	352	0.0344	1186	0.0299
p73(p53)/Trachea-p73-ChIP-Seq(PRJNA310161)/Homer	NRRRCAWGTCCDGRCATGYY	0.01	-5.264	0.0104	79	0.0077	226	0.0057
FUS3(ABI3VP1)/col-FUS3-DAP-Seq(GSE60143)/Homer	DNNWTNTGCATGKNN	0.01	-5.261	0.0104	2075	0.2028	7632.6	0.1927
At1g75490(AP2EREBP)/colamp-At1g75490-DAP-Seq(GSE60143)/Homer	CACCGMCT	0.01	-5.261	0.0104	1482	0.1448	5388.6	0.1361
GATA3(Zf),DR4/iTreg-Gata3-ChIP-Seq(GSE20898)/Homer	AGATGKDGAGATAAG	0.01	-5.201	0.011	222	0.0217	721.6	0.0182
SOC1(MADS)/Seedling-SOC1-ChIP-Seq(GSE45846)/Homer	TWCCAWWTWTGG	0.01	-5.199	0.011	920	0.0899	3282.6	0.0829
Unknown3/Drosophila-Promoters/Homer	ACVAKCTGGCAGCGC	0.01	-5.191	0.0111	148	0.0145	461.2	0.0116
WRKY50(WRKY)/col-WRKY50-DAP-Seq(GSE60143)/Homer	NNTTGACTWNNGNNN	0.01	-5.176	0.0113	1970	0.1925	7238.8	0.1828
At3g45610(C2C2dof)/col-At3g45610-DAP-Seq(GSE60143)/Homer	TWACTTTTTS	0.01	-5.153	0.0115	3754	0.3669	14055.5	0.3549
Unknown1/Arabidopsis-Promoters/Homer	RGGGTAWWWTHGTAA	0.01	-5.134	0.0117	218	0.0213	708.7	0.0179
SOL1(CPP)/colamp-SOL1-DAP-Seq(GSE60143)/Homer	ATTTAAATHN	0.01	-5.133	0.0117	3699	0.3615	13845.5	0.3496
HRE(HSF)/HepG2-HSF1-ChIP-Seq(GSE31477)/Homer	BSTTCTRGAABVTTCYAGAA	0.01	-5.094	0.0121	283	0.0277	941.2	0.0238
Prop1(Homeobox)/GHFT1-PROP1.biotin-ChIP-Seq(GSE77302)/Homer	NTAATBNAATTA	0.01	-4.996	0.0133	1762	0.1722	6459.4	0.1631
dof43(C2C2dof)/colamp-dof43-DAP-Seq(GSE60143)/Homer	NAAAAAGTDA	0.01	-4.899	0.0147	3558	0.3477	13319.9	0.3363
OBP1(C2C2dof)/col-OBP1-DAP-Seq(GSE60143)/Homer	NHHACTTTWT	0.01	-4.814	0.0159	6035	0.5898	22894.2	0.578
MYB116(MYB)/colamp-MYB116-DAP-Seq(GSE60143)/Homer	AGTTAGGCAN	0.01	-4.749	0.017	1325	0.1295	4820	0.1217
GT1(Trihelix)/col-GT1-DAP-Seq(GSE60143)/Homer	TTAACCATGGTTAAD	0.01	-4.719	0.0175	24	0.0023	54.8	0.0014
p53(p53)/mES-cMyc-ChIP-Seq(GSE11431)/Homer	ACATGCCCGGGCAT	0.01	-4.707	0.0176	30	0.0029	72.9	0.0018
bZIP68(bZIP)/col-bZIP68-DAP-Seq(GSE60143)/Homer	WGCCACGTGK	0.01	-4.695	0.0178	431	0.0421	1488.1	0.0376
AREB3(bZIP)/col-AREB3-DAP-Seq(GSE60143)/Homer	NKGMCACGTGDCMNN	0.01	-4.685	0.018	388	0.0379	1331.6	0.0336
MYB96(MYB)/colamp-MYB96-DAP-Seq(GSE60143)/Homer	WGGTRGTTGG	0.01	-4.679	0.018	1642	0.1605	6021.5	0.152
HSF7(HSF)/colamp-HSF7-DAP-Seq(GSE60143)/Homer	TTCTAGAAGCTTCTA	0.01	-4.635	0.0188	454	0.0444	1574.2	0.0397
REB1/SacCer-Promoters/Homer	KCCGGGTAAYRR	0.01	-4.612	0.0192	294	0.0287	991.4	0.025
PR(NR)/T47D-PR-ChIP-Seq(GSE31130)/Homer	VAGRACAKNCTGTBC	0.1	-4.537	0.0207	4036	0.3944	15182.3	0.3833
Twist(bHLH)/HMLE-TWIST1-ChIP-Seq(Chang_et_al)/Homer	VCAKCTGGNNNCCAGMTGBN	0.1	-4.475	0.0219	263	0.0257	882	0.0223
AT2G28810(C2C2dof)/colamp-AT2G28810-DAP-Seq(GSE60143)/Homer	VAAAAAGTWA	0.1	-4.415	0.0232	5084	0.4969	19236.1	0.4857
At1g64620(C2C2dof)/colamp-At1g64620-DAP-Seq(GSE60143)/Homer	CACTTTTT	0.1	-4.409	0.0233	3531	0.3451	13249.9	0.3345
PRDM15(Zf)/ESC-Prdm15-ChIP-Seq(GSE73694)/Homer	YCCDNTCCAGGTTTT	0.1	-4.355	0.0246	1907	0.1864	7044.2	0.1779
WRKY43(WRKY)/colamp-WRKY43-DAP-Seq(GSE60143)/Homer	NCGTTGACTTTT	0.1	-4.339	0.0249	703	0.0687	2505.6	0.0633
At1g76110(ARID)/colamp-At1g76110-DAP-Seq(GSE60143)/Homer	ATTTAATG	0.1	-4.329	0.0251	1751	0.1711	6453.7	0.1629
AT2G20110(CPP)/colamp-AT2G20110-DAP-Seq(GSE60143)/Homer	ATTYAAATHY	0.1	-4.321	0.0253	3539	0.3459	13286.3	0.3355
RAP26(AP2EREBP)/colamp-RAP26-DAP-Seq(GSE60143)/Homer	HDATGGCGGCGG	0.1	-4.294	0.0259	655	0.064	2328.1	0.0588
E2F7(E2F)/Hela-E2F7-ChIP-Seq(GSE32673)/Homer	VDTTTCCCGCCA	0.1	-4.275	0.0264	88	0.0086	266.3	0.0067
SeqBias: polyA-repeat	AAAAAAAAAA	0.1	-4.254	0.0269	10229	0.9997	39569.6	0.9991
WRKY11(WRKY)/col-WRKY11-DAP-Seq(GSE60143)/Homer	SCGTTGACTTTN	0.1	-4.252	0.0269	237	0.0232	793.8	0.02
Ascl2(bHLH)/ESC-Ascl2-ChIP-Seq(GSE97712)/Homer	SSRGCAGCTGCH	0.1	-4.176	0.029	1981	0.1936	7336.9	0.1852
ZNF341(Zf)/EBV-ZNF341-ChIP-Seq(GSE113194)/Homer	GGAACAGCCG	0.1	-4.157	0.0295	1169	0.1142	4260.2	0.1076
Sox10(HMG)/SciaticNerve-Sox3-ChIP-Seq(GSE35132)/Homer	CCWTTGTYYB	0.1	-4.153	0.0295	3149	0.3078	11801.3	0.298
BBX31(Orphan)/col-BBX31-DAP-Seq(GSE60143)/Homer	NAAAAAGTDA	0.1	-4.149	0.0296	3814	0.3728	14356.3	0.3625
GBF6(bZIP)/colamp-GBF6-DAP-Seq(GSE60143)/Homer	WWTGMCACGTCABCW	0.1	-4.1	0.031	291	0.0284	992.9	0.0251
ANAC057(NAC)/colamp-ANAC057-DAP-Seq(GSE60143)/Homer	DVCKTGNNNNNCAMG	0.1	-4.09	0.0313	1131	0.1105	4121	0.104
ERF115(AP2EREBP)/colamp-ERF115-DAP-Seq(GSE60143)/Homer	WTKRCGGCGB	0.1	-4.052	0.0324	896	0.0876	3238.4	0.0818
BMAL1(bHLH)/Liver-Bmal1-ChIP-Seq(GSE39860)/Homer	GNCACGTG	0.1	-4.041	0.0327	3149	0.3078	11809.2	0.2982
JGL(C2H2)/col-JGL-DAP-Seq(GSE60143)/Homer	ACYTTCAGTT	0.1	-4.031	0.033	3509	0.3429	13192.2	0.3331
HDG7(HB)/col-HDG7-DAP-Seq(GSE60143)/Homer	WGCATTTAATGC	0.1	-4.03	0.033	506	0.0495	1784.2	0.045
WUS1(Homeobox)/colamp-WUS1-DAP-Seq(GSE60143)/Homer	CAWTCATTCA	0.1	-4.027	0.033	1131	0.1105	4123.8	0.1041
ZSCAN22(Zf)/HEK293-ZSCAN22.GFP-ChIP-Seq(GSE58341)/Homer	SMCAGTCWGAKGGAGGAGGC	0.1	-4.011	0.0335	121	0.0118	384.5	0.0097
HSFA6B(HSF)/colamp-HSFA6B-DAP-Seq(GSE60143)/Homer	NTTCTAGAANHTTCT	0.1	-4.008	0.0335	1201	0.1174	4388.1	0.1108
At1g13300(G2like)/col-At1g13300-DAP-Seq(GSE60143)/Homer	GAATCTWAGATTCYN	0.1	-3.992	0.034	27	0.0026	67.4	0.0017
bHLH157(bHLH)/col-bHLH157-DAP-Seq(GSE60143)/Homer	KACACGTCTCTY	0.1	-3.958	0.0351	318	0.0311	1094.1	0.0276
DREB2(AP2EREBP)/col-DREB2-DAP-Seq(GSE60143)/Homer	TMACCGACATWA	0.1	-3.9	0.0371	305	0.0298	1048.6	0.0265
OBP4(C2C2dof)/col-OBP4-DAP-Seq(GSE60143)/Homer	WTTHACTTTTTB	0.1	-3.899	0.0371	3618	0.3536	13621.9	0.3439
TRP2(MYBrelated)/colamp-TRP2-DAP-Seq(GSE60143)/Homer	TAAACCCT	0.1	-3.854	0.0387	350	0.0342	1214.4	0.0307
Nkx2.1(Homeobox)/LungAC-Nkx2.1-ChIP-Seq(GSE43252)/Homer	RSCACTYRAG	0.1	-3.84	0.0392	4986	0.4873	18902.2	0.4773
ZNF415(Zf)/HEK293-ZNF415.GFP-ChIP-Seq(GSE58341)/Homer	GRTGMTRGAGCC	0.1	-3.836	0.0393	861	0.0841	3116.8	0.0787
EFL-1(E2F)/cElegans-L1-EFL1-ChIP-Seq(modEncode)/Homer	TGCAARYGCGCTCYA	0.1	-3.795	0.0408	25	0.0024	62.5	0.0016
ABR1(AP2EREBP)/colamp-ABR1-DAP-Seq(GSE60143)/Homer	AAATGGCGGCGG	0.1	-3.762	0.0422	591	0.0578	2109.9	0.0533
AT5G02460(C2C2dof)/col-AT5G02460-DAP-Seq(GSE60143)/Homer	CHCCTTTT	0.1	-3.752	0.0425	4705	0.4598	17823.7	0.45
AT3G09735(S1Falike)/col-AT3G09735-DAP-Seq(GSE60143)/Homer	TTCTAGAANMTTCTA	0.1	-3.748	0.0426	931	0.091	3383.5	0.0854
Duxbl(Homeobox)/NIH3T3-Duxbl.HA-ChIP-Seq(GSE119782)/Homer	TAAYCYAATCAA	0.1	-3.744	0.0427	171	0.0167	566.8	0.0143
ERF105(AP2EREBP)/colamp-ERF105-DAP-Seq(GSE60143)/Homer	TGGCGGCT	0.1	-3.742	0.0427	970	0.0948	3530.4	0.0891
MYB94(MYB)/col-MYB94-DAP-Seq(GSE60143)/Homer	WGGTRGTTGGKA	0.1	-3.726	0.0433	736	0.0719	2652	0.067
HRE(HSF)/Striatum-HSF1-ChIP-Seq(GSE38000)/Homer	TTCTAGAABNTTCTA	0.1	-3.721	0.0435	449	0.0439	1584	0.04
dof24(C2C2dof)/col-dof24-DAP-Seq(GSE60143)/Homer	TWMCTTTTTG	0.1	-3.714	0.0437	4417	0.4317	16714.9	0.422
CCA(Myb)/Arabidopsis-CCA.GFP-ChIP-Seq(GSE70533)/Homer	AGATATYTTT	0.1	-3.712	0.0437	1954	0.191	7262	0.1834
HNF4a(NR),DR1/HepG2-HNF4a-ChIP-Seq(GSE25021)/Homer	CARRGKBCAAAGTYCA	0.1	-3.684	0.0448	868	0.0848	3149.4	0.0795
SPL1(SBP)/colamp-SPL1-DAP-Seq(GSE60143)/Homer	HYGTACDTWH	0.1	-3.679	0.045	3093	0.3023	11621.8	0.2934
MYB44(MYB)/colamp-MYB44-DAP-Seq(GSE60143)/Homer	CVGTTWWKTCNGTTA	0.1	-3.593	0.0489	154	0.0151	508.4	0.0128
RKD2(RWPRK)/colamp-RKD2-DAP-Seq(GSE60143)/Homer	GACKTTTCRDCTTCC	0.1	-3.523	0.0524	1290	0.1261	4750	0.1199
SFP1/SacCer-Promoters/Homer	DDAAAAATTTTY	0.1	-3.508	0.0531	282	0.0276	974.4	0.0246
MYB3(MYB)/Arabidopsis-MYB3-ChIP-Seq(GSE80564)/Homer	GKTAGGTRGG	0.1	-3.488	0.0541	2932	0.2866	11018.6	0.2782
AT1G76880(Trihelix)/col-AT1G76880-DAP-Seq(GSE60143)/Homer	ACGGTAAAAW	0.1	-3.467	0.0551	919	0.0898	3351.8	0.0846
AT1G28160(AP2EREBP)/colamp-AT1G28160-DAP-Seq(GSE60143)/Homer	GGCGGCGG	0.1	-3.455	0.0557	1000	0.0977	3657.3	0.0923
WRKY3(WRKY)/col-WRKY3-DAP-Seq(GSE60143)/Homer	NCKTTGACYDDN	0.1	-3.426	0.0572	1193	0.1166	4388.3	0.1108
RBPJ:Ebox(?,bHLH)/Panc1-Rbpj1-ChIP-Seq(GSE47459)/Homer	GGGRAARRGRMCAGMTG	0.1	-3.419	0.0575	668	0.0653	2410.8	0.0609
ERF7(AP2EREBP)/col-ERF7-DAP-Seq(GSE60143)/Homer	ATGRCGGCGG	0.1	-3.413	0.0578	939	0.0918	3429	0.0866
ATHB18(Homeobox)/colamp-ATHB18-DAP-Seq(GSE60143)/Homer	YCAATSATTG	0.1	-3.398	0.0585	494	0.0483	1761.6	0.0445
BPC1(BBRBPC)/colamp-BPC1-DAP-Seq(GSE60143)/Homer	GARGAGAGAGAA	0.1	-3.391	0.0588	1423	0.1391	5262	0.1329
AT1G44830(AP2EREBP)/col-AT1G44830-DAP-Seq(GSE60143)/Homer	NCCACCGACA	0.1	-3.385	0.0591	236	0.0231	809.6	0.0204
WRKY46(WRKY)/colamp-WRKY46-DAP-Seq(GSE60143)/Homer	AAAGTCAACGSN	0.1	-3.325	0.0626	93	0.0091	296.8	0.0075
bHLHE41(bHLH)/proB-Bhlhe41-ChIP-Seq(GSE93764)/Homer	KCACGTGMCN	0.1	-3.317	0.063	1500	0.1466	5559.4	0.1404
Sox6(HMG)/Myotubes-Sox6-ChIP-Seq(GSE32627)/Homer	CCATTGTTNY	0.1	-3.298	0.0641	3232	0.3159	12185.3	0.3077
AT2G15740(C2H2)/col-AT2G15740-DAP-Seq(GSE60143)/Homer	DHNDWATCGATD	0.1	-3.298	0.0641	1137	0.1111	4183.7	0.1056
ZFP3(Zf)/HEK293-ZFP3.GFP-ChIP-Seq(GSE58341)/Homer	GGGTTTTGAAGGATGARTAGGAGTT	0.1	-3.297	0.0641	5	0.0005	7	0.0002
ANAC083(NAC)/col-ANAC083-DAP-Seq(GSE60143)/Homer	CKTRWNNNWYAMGTA	0.1	-3.291	0.0642	1195	0.1168	4403.4	0.1112
DREB19(AP2EREBP)/colamp-DREB19-DAP-Seq(GSE60143)/Homer	AATGTCGGTK	0.1	-3.26	0.0661	351	0.0343	1235.5	0.0312
Pax7(Paired,Homeobox),longest/Myoblast-Pax7-ChIP-Seq(GSE25064)/Homer	NTAATTDGCYAATTANNWWD	0.1	-3.255	0.0663	77	0.0075	241.9	0.0061
At1g36060(AP2EREBP)/colamp-At1g36060-DAP-Seq(GSE60143)/Homer	NNWWKGTCGGTG	0.1	-3.231	0.0679	440	0.043	1566.3	0.0395
MYB3R1(MYB)/col-MYB3R1-DAP-Seq(GSE60143)/Homer	WWDTDACCGTTR	0.1	-3.192	0.0704	399	0.039	1415.4	0.0357
MYB57(MYB)/col-MYB57-DAP-Seq(GSE60143)/Homer	TTACCTAACT	0.1	-3.157	0.0728	947	0.0926	3472.7	0.0877
NPAS(bHLH)/Liver-NPAS-ChIP-Seq(GSE39860)/Homer	NVCACGTG	0.1	-3.11	0.0762	2761	0.2698	10392.6	0.2624
DREB26(AP2EREBP)/col-DREB26-DAP-Seq(GSE60143)/Homer	CCACCGACAH	0.1	-3.091	0.0775	164	0.016	554.2	0.014
PGR(NR)/EndoStromal-PGR-ChIP-Seq(GSE69539)/Homer	AAGAACATWHTGTTC	0.1	-3.075	0.0786	475	0.0464	1702.3	0.043
bZIP28(bZIP)/col-bZIP28-DAP-Seq(GSE60143)/Homer	TGCCACGTSABH	0.1	-2.96	0.0881	329	0.0322	1163.7	0.0294
TCP1(TCP)/col-TCP1-DAP-Seq(GSE60143)/Homer	GGGGGCCCMMCN	0.1	-2.957	0.0882	492	0.0481	1770.8	0.0447
COG1(C2C2dof)/col-COG1-DAP-Seq(GSE60143)/Homer	DAAAAAGTGA	0.1	-2.925	0.0908	3520	0.344	13325.6	0.3365
HSF3(HSF)/colamp-HSF3-DAP-Seq(GSE60143)/Homer	NTTCTAGAAKCTTCT	0.1	-2.919	0.0913	2077	0.203	7787.4	0.1966
STOP1(C2H2)/colamp-STOP1-DAP-Seq(GSE60143)/Homer	DTATCTGGKGRAGGT	0.1	-2.89	0.0938	785	0.0767	2874.6	0.0726
AT5G66940(C2C2dof)/col-AT5G66940-DAP-Seq(GSE60143)/Homer	NNHACTTTWT	0.1	-2.89	0.0938	4636	0.4531	17633.8	0.4452
IDD5(C2H2)/colamp-IDD5-DAP-Seq(GSE60143)/Homer	TTTTGTCTTTTTBTK	0.1	-2.878	0.0946	1618	0.1581	6037.5	0.1524
MYB4(MYB)/col200-MYB4-DAP-Seq(GSE60143)/Homer	WAGKTAGGTARR	0.1	-2.876	0.0946	1286	0.1257	4773	0.1205
ZNF675(Zf)/HEK293-ZNF675.GFP-ChIP-Seq(GSE58341)/Homer	ARGAGGMCAAAATGW	0.1	-2.875	0.0946	311	0.0304	1099.9	0.0278
SEP3(MADS)/Arabidoposis-Flower-Sep3-ChIP-Seq/Homer	CCAAAAAGGG	0.1	-2.864	0.0954	2641	0.2581	9952.9	0.2513
ANAC016(NAC)/col-ANAC016-DAP-Seq(GSE60143)/Homer	WNCTTGNNNNNCAMG	0.1	-2.837	0.0979	1223	0.1195	4536.2	0.1145
HSF6(HSF)/col-HSF6-DAP-Seq(GSE60143)/Homer	TTYTAGAAGCTTCTA	0.1	-2.831	0.0983	492	0.0481	1775.8	0.0448
SPL15(SBP)/colamp-SPL15-DAP-Seq(GSE60143)/Homer	WDWMMGTACADW	0.1	-2.821	0.0992	2373	0.2319	8928	0.2254
GATA14(C2C2gata)/col-GATA14-DAP-Seq(GSE60143)/Homer	AYCAGATCTG	0.1	-2.82	0.0992	1134	0.1108	4199.5	0.106
At1g77640(AP2EREBP)/col-At1g77640-DAP-Seq(GSE60143)/Homer	TGTCGGTGGA	0.1	-2.82	0.0992	137	0.0134	462.1	0.0117
Hnf1(Homeobox)/Liver-Foxa2-Chip-Seq(GSE25694)/Homer	GGTTAAWCATTAA	0.1	-2.807	0.1001	375	0.0366	1339.3	0.0338
NST1(NAC)/colamp-NST1-DAP-Seq(GSE60143)/Homer	WRCTTRWWNWWYAAG	0.1	-2.773	0.1034	1604	0.1568	5991.4	0.1513
RIN(MADS)/Tomato-RIN-ChIP-Seq(GSE116581)/Homer	CYAAAAWWGG	0.1	-2.764	0.1041	2762	0.2699	10425.5	0.2632
Pax7(Paired,Homeobox),long/Myoblast-Pax7-ChIP-Seq(GSE25064)/Homer	TAATCHGATTAC	0.1	-2.759	0.1044	73	0.0071	234.9	0.0059
ANAC070(NAC)/colamp-ANAC070-DAP-Seq(GSE60143)/Homer	CTTRHDNHNBAAGHW	0.1	-2.757	0.1044	2057	0.201	7723.4	0.195
bZIP48(bZIP)/colamp-bZIP48-DAP-Seq(GSE60143)/Homer	DDWWKVTSACGTGGC	0.1	-2.757	0.1044	492	0.0481	1778.5	0.0449
TCP20(TCP)/col-TCP20-DAP-Seq(GSE60143)/Homer	GGDCCCAC	0.1	-2.746	0.1053	546	0.0534	1981.8	0.05
ABF1/SacCer-Promoters/Homer	CGTRNAAARTGA	0.1	-2.734	0.1063	249	0.0243	874.6	0.0221
Oct4(POU,Homeobox)/mES-Oct4-ChIP-Seq(GSE11431)/Homer	ATTTGCATAW	0.1	-2.699	0.11	1131	0.1105	4195.9	0.1059
DEAR2(AP2EREBP)/colamp-DEAR2-DAP-Seq(GSE60143)/Homer	HCACCGACAWHD	0.1	-2.698	0.11	695	0.0679	2544.9	0.0643
SPL11(SBP)/col100-SPL11-DAP-Seq(GSE60143)/Homer	YTGTACTTBH	0.1	-2.686	0.111	1246	0.1218	4633.4	0.117
SGR5(C2H2)/colamp-SGR5-DAP-Seq(GSE60143)/Homer	TTTGTCTTTTTT	0.1	-2.659	0.1139	1518	0.1484	5671.7	0.1432
Nur77(NR)/K562-NR4A1-ChIP-Seq(GSE31363)/Homer	TGACCTTTNCNT	0.1	-2.599	0.1207	392	0.0383	1410.9	0.0356
dof42(C2C2dof)/col-dof42-DAP-Seq(GSE60143)/Homer	AAAAAGGC	0.1	-2.593	0.1213	1468	0.1435	5485.6	0.1385
AT5G63260(C3H)/col-AT5G63260-DAP-Seq(GSE60143)/Homer	RAAAAAGTRA	0.1	-2.568	0.1242	5268	0.5149	20110.4	0.5078
VDR(NR),DR3/GM10855-VDR+vitD-ChIP-Seq(GSE22484)/Homer	ARAGGTCANWGAGTTCANNN	0.1	-2.541	0.1273	389	0.038	1401.6	0.0354
MYB88(MYB)/col-MYB88-DAP-Seq(GSE60143)/Homer	HNACGCTCCT	0.1	-2.535	0.1279	2016	0.197	7584.4	0.1915
M1BP(Zf)/S2R+-M1BP-ChIP-Seq(GSE49842)/Homer	CAGTGTGACCGT	0.1	-2.489	0.1338	393	0.0384	1418.4	0.0358
Brn1(POU,Homeobox)/NPC-Brn1-ChIP-Seq(GSE35496)/Homer	TATGCWAATBAV	0.1	-2.473	0.1357	715	0.0699	2631.2	0.0664
ABF2(bZIP)/col-ABF2-DAP-Seq(GSE60143)/Homer	KGMCACGTGDCMHHH	0.1	-2.448	0.1388	265	0.0259	942.6	0.0238
LMI1(HB)/colamp-LMI1-DAP-Seq(GSE60143)/Homer	AATTATTG	0.1	-2.443	0.1393	2067	0.202	7787.6	0.1966
DAG2(C2C2dof)/col-DAG2-DAP-Seq(GSE60143)/Homer	WWTTHACTTTTT	0.1	-2.423	0.1419	4172	0.4077	15888.9	0.4012
HSFC1(HSF)/col-HSFC1-DAP-Seq(GSE60143)/Homer	HTTCTAGAADCTTCT	0.1	-2.421	0.142	452	0.0442	1642.6	0.0415
WRKY45(WRKY)/col-WRKY45-DAP-Seq(GSE60143)/Homer	HNNNKTTGACTWWNH	0.1	-2.393	0.1457	868	0.0848	3215.7	0.0812
ZNF317(Zf)/HEK293-ZNF317.GFP-ChIP-Seq(GSE58341)/Homer	GTCWGCTGTYYCTCT	0.1	-2.364	0.1498	164	0.016	571	0.0144
SRS7(SRS)/colamp-SRS7-DAP-Seq(GSE60143)/Homer	HATAGGTTTH	0.1	-2.356	0.1508	5383	0.5261	20578.9	0.5196
ANAC042(NAC)/col-ANAC042-DAP-Seq(GSE60143)/Homer	CGTNDHNDHNACGKY	0.1	-2.341	0.1527	249	0.0243	886.5	0.0224
ZNF16(Zf)/HEK293-ZNF16.GFP-ChIP-Seq(GSE58341)/Homer	MACCTTCYATGGCTCCCTAKTGCCY	0.1	-2.33	0.1543	23	0.0022	66.1	0.0017
HDG1(Homeobox)/col100-HDG1-DAP-Seq(GSE60143)/Homer	DDYAATTAATGH	0.1	-2.329	0.1543	1560	0.1525	5856.9	0.1479
HAT5(Homeobox)/colamp-HAT5-DAP-Seq(GSE60143)/Homer	DCAATWATTG	0.1	-2.321	0.1552	408	0.0399	1481.7	0.0374
MYB3R4(MYB)/col-MYB3R4-DAP-Seq(GSE60143)/Homer	AWWTAACCGTTR	0.1	-2.317	0.1555	187	0.0183	657.9	0.0166
AtIDD11(C2H2)/colamp-AtIDD11-DAP-Seq(GSE60143)/Homer	TTTGTCGTTT	1	-2.255	0.1651	786	0.0768	2913	0.0735
Oct6(POU,Homeobox)/NPC-Pou3f1-ChIP-Seq(GSE35496)/Homer	WATGCAAATGAG	1	-2.239	0.1677	1017	0.0994	3792	0.0957
AtHB32(ZFHD)/col200-AtHB32-DAP-Seq(GSE60143)/Homer	CGAATTAT	1	-2.235	0.168	3100	0.303	11775.4	0.2973
HSFA1E(HSF)/col-HSFA1E-DAP-Seq(GSE60143)/Homer	TTCTAGAAGCTTCTA	1	-2.233	0.1682	185	0.0181	652.1	0.0165
LBD13(LOBAS2)/colamp-LBD13-DAP-Seq(GSE60143)/Homer	KCCGTNWTTTBCGGC	1	-2.225	0.1691	670	0.0655	2475	0.0625
At5g22890(C2H2)/col-At5g22890-DAP-Seq(GSE60143)/Homer	NSAGGTKWTATCTGD	1	-2.21	0.1715	75	0.0073	250.6	0.0063
Nr5a2(NR)/Pancreas-LRH1-ChIP-Seq(GSE34295)/Homer	BTCAAGGTCA	1	-2.207	0.1717	1230	0.1202	4605.4	0.1163
MYB107(MYB)/col-MYB107-DAP-Seq(GSE60143)/Homer	RGTWGGTRRR	1	-2.197	0.1732	2842	0.2778	10786.3	0.2723
WRKY8(WRKY)/colamp-WRKY8-DAP-Seq(GSE60143)/Homer	CGTTGACTTT	1	-2.189	0.1743	231	0.0226	824	0.0208
Tbox:Smad(T-box,MAD)/ESCd5-Smad2_3-ChIP-Seq(GSE29422)/Homer	AGGTGHCAGACA	1	-2.164	0.1784	325	0.0318	1176.5	0.0297
MYB63(MYB)/col-MYB63-DAP-Seq(GSE60143)/Homer	BHYACCWACCHH	1	-2.163	0.1784	838	0.0819	3115.1	0.0787
ANAC004(NAC)/colamp-ANAC004-DAP-Seq(GSE60143)/Homer	WNCTTVYNNNRBAAG	1	-2.139	0.1823	631	0.0617	2331.3	0.0589
AT3G60490(AP2EREBP)/colamp-AT3G60490-DAP-Seq(GSE60143)/Homer	NNRCCGACANNNNNN	1	-2.136	0.1827	161	0.0157	566.3	0.0143
GFY-Staf(?,Zf)/Promoter/Homer	RACTACAATTCCCAGAAKGC	1	-2.122	0.1849	50	0.0049	162.1	0.0041
MS188(MYB)/colamp-MS188-DAP-Seq(GSE60143)/Homer	WARKTAGGTRRA	1	-2.107	0.1873	1641	0.1604	6184.3	0.1561
At1g72010(TCP)/colamp-At1g72010-DAP-Seq(GSE60143)/Homer	GGDCCCAC	1	-2.1	0.1885	748	0.0731	2777.9	0.0701
MYB58(MYB)/colamp-MYB58-DAP-Seq(GSE60143)/Homer	YYYACCWACC	1	-2.085	0.1909	1711	0.1672	6454.2	0.163
SPCH(bHLH)/Seedling-SPCH-ChIP-Seq(GSE57497)/Homer	WNBCACGTGA	1	-2.08	0.1916	1690	0.1652	6374	0.1609
ERF38(AP2EREBP)/col-ERF38-DAP-Seq(GSE60143)/Homer	CACCGACA	1	-2.073	0.1926	268	0.0262	966	0.0244
ATY19(MYB)/col-ATY19-DAP-Seq(GSE60143)/Homer	YYCACCWACCAT	1	-2.039	0.199	1317	0.1287	4950.6	0.125
LBD2(LOBAS2)/colamp-LBD2-DAP-Seq(GSE60143)/Homer	TCCGAWTTTTTCGGN	1	-2.03	0.2005	310	0.0303	1125	0.0284
AT2G33550(Trihelix)/colamp-AT2G33550-DAP-Seq(GSE60143)/Homer	TTTAAGGGCAYTTTT	1	-2.024	0.2014	4641	0.4536	17745.9	0.4481
AT2G01818(PLATZ)/col-AT2G01818-DAP-Seq(GSE60143)/Homer	TCTAGAABSTTC	1	-2.011	0.2038	342	0.0334	1246	0.0315
TCFL2(HMG)/K562-TCF7L2-ChIP-Seq(GSE29196)/Homer	ACWTCAAAGG	1	-2.007	0.2043	163	0.0159	577.1	0.0146
Brn2(POU,Homeobox)/NPC-Brn2-ChIP-Seq(GSE35496)/Homer	ATGAATATTC	1	-2.005	0.2044	274	0.0268	991.8	0.025
AR-halfsite(NR)/LNCaP-AR-ChIP-Seq(GSE27824)/Homer	CCAGGAACAG	1	-1.984	0.2083	5959	0.5824	22853.2	0.577
MYB55(MYB)/colamp-MYB55-DAP-Seq(GSE60143)/Homer	YACCWAMC	1	-1.98	0.2088	1956	0.1912	7403.8	0.1869
CAMTA1(CAMTA)/col-CAMTA1-DAP-Seq(GSE60143)/Homer	WWAACGCGTT	1	-1.972	0.2102	295	0.0288	1071.3	0.0271
MYNN(Zf)/HEK293-MYNN.eGFP-ChIP-Seq(Encode)/Homer	TTCAAAWTAAAAGTC	1	-1.971	0.2102	604	0.059	2238.1	0.0565
GRE(NR),IR3/A549-GR-ChIP-Seq(GSE32465)/Homer	NRGVACABNVTGTYCY	1	-1.968	0.2104	210	0.0205	753.5	0.019
bHLH10(bHLH)/colamp-bHLH10-DAP-Seq(GSE60143)/Homer	YACCGACA	1	-1.933	0.2176	167	0.0163	594.9	0.015
Phox2b(Homeobox)/CLBGA-PHOX2B-ChIP-Seq(GSE90683)/Homer	TTAATTNAATTA	1	-1.92	0.2201	584	0.0571	2165.9	0.0547
ERF8(AP2EREBP)/colamp-ERF8-DAP-Seq(GSE60143)/Homer	CGCCGYCATW	1	-1.874	0.23	582	0.0569	2160.4	0.0545
ERRg(NR)/Kidney-ESRRG-ChIP-Seq(GSE104905)/Homer	GTGACCTTGRVN	1	-1.873	0.23	1425	0.1393	5377.6	0.1358
AGL6(MADS)/col-AGL6-DAP-Seq(GSE60143)/Homer	TTWCCWWAWWDGGWA	1	-1.869	0.2307	321	0.0314	1174	0.0296
HSFA6A(HSF)/col-HSFA6A-DAP-Seq(GSE60143)/Homer	RGAAGNTTCTAGAAN	1	-1.864	0.2313	88	0.0086	304.2	0.0077
ARF16(ARF)/col-ARF16-DAP-Seq(GSE60143)/Homer	ATTTTACGAT	1	-1.863	0.2313	182	0.0178	652.7	0.0165
LCL1(MYBrelated)/colamp-LCL1-DAP-Seq(GSE60143)/Homer	NAAAATATCTWHWWN	1	-1.857	0.2323	407	0.0398	1498.5	0.0378
T1ISRE(IRF)/ThioMac-Ifnb-Expression/Homer	ACTTTCGTTTCT	1	-1.845	0.2347	26	0.0025	82	0.0021
Unknown6/Drosophila-Promoters/Homer	AATTTTAAAA	1	-1.84	0.2356	2421	0.2366	9204.2	0.2324
PCF/Arabidopsis-Promoters/Homer	NNWWWTGGGCYTDDN	1	-1.821	0.2398	490	0.0479	1814.2	0.0458
GFY(?)/Promoter/Homer	ACTACAATTCCC	1	-1.82	0.2398	91	0.0089	316.2	0.008
WIP5(C2H2)/colamp-WIP5-DAP-Seq(GSE60143)/Homer	TDTTCTCMAGGT	1	-1.814	0.2408	2174	0.2125	8257.2	0.2085
GATA6(C2C2gata)/col200-GATA6-DAP-Seq(GSE60143)/Homer	TAGATCTARAHH	1	-1.8	0.2438	245	0.0239	890.8	0.0225
CHR(?)/Hela-CellCycle-Expression/Homer	SRGTTTCAAA	1	-1.79	0.246	1541	0.1506	5829.9	0.1472
AT3G52440(C2C2dof)/colamp-AT3G52440-DAP-Seq(GSE60143)/Homer	DTHACTTTTT	1	-1.778	0.2484	5135	0.5019	19687.2	0.4971
AT3G10030(Trihelix)/colamp-AT3G10030-DAP-Seq(GSE60143)/Homer	GCCGTTAA	1	-1.771	0.2498	936	0.0915	3515.8	0.0888
GATA11(C2C2gata)/col-GATA11-DAP-Seq(GSE60143)/Homer	DDHYYAGATCTR	1	-1.769	0.25	732	0.0715	2737.6	0.0691
WRKY21(WRKY)/colamp-WRKY21-DAP-Seq(GSE60143)/Homer	DCGTTGACTTTT	1	-1.758	0.2524	211	0.0206	764.1	0.0193
At4g01280(MYBrelated)/colamp-At4g01280-DAP-Seq(GSE60143)/Homer	AAATATCT	1	-1.751	0.2537	1484	0.145	5614.7	0.1418
CEJ1(AP2EREBP)/col-CEJ1-DAP-Seq(GSE60143)/Homer	WWTGTCGGTG	1	-1.737	0.2569	654	0.0639	2442.8	0.0617
FRS9(ND)/col-FRS9-DAP-Seq(GSE60143)/Homer	RGAGAGAGAAAG	1	-1.727	0.2591	545	0.0533	2028.3	0.0512
Pit1(Homeobox)/GCrat-Pit1-ChIP-Seq(GSE58009)/Homer	ATGMATATDC	1	-1.722	0.26	2494	0.2437	9498.5	0.2398
At1g22810(AP2EREBP)/colamp-At1g22810-DAP-Seq(GSE60143)/Homer	BCACCGACANNN	1	-1.714	0.2617	259	0.0253	946.5	0.0239
ABI5(bZIP)/col-ABI5-DAP-Seq(GSE60143)/Homer	GCCACGTG	1	-1.709	0.2626	471	0.046	1749	0.0442
MYB92(MYB)/colamp-MYB92-DAP-Seq(GSE60143)/Homer	GGTAGGTR	1	-1.699	0.265	1655	0.1617	6275.6	0.1584
Pknox1(Homeobox)/ES-Prep1-ChIP-Seq(GSE63282)/Homer	SCTGTCAVTCAV	1	-1.699	0.265	435	0.0425	1612.5	0.0407
Gli2(Zf)/GM2-Gli2-ChIP-Chip(GSE112702)/Homer	YSTGGGTGGTCT	1	-1.696	0.2651	431	0.0421	1597.6	0.0403
LHY(Myb)/Seedling-LHY-ChIP-Seq(GSE52175)/Homer	ADAAATATCT	1	-1.686	0.2672	2303	0.2251	8767.2	0.2214
RAP21(AP2EREBP)/colamp-RAP21-DAP-Seq(GSE60143)/Homer	BCACCGACAHNN	1	-1.665	0.2726	103	0.0101	364.6	0.0092
At4g31060(AP2EREBP)/colamp-At4g31060-DAP-Seq(GSE60143)/Homer	CACCGACAAW	1	-1.642	0.2786	246	0.024	900.7	0.0227
MYB27(MYB)/colamp-MYB27-DAP-Seq(GSE60143)/Homer	TACCTAACWT	1	-1.636	0.2799	379	0.037	1403.5	0.0354
ZNF528(Zf)/HEK293-ZNF528.GFP-ChIP-Seq(GSE58341)/Homer	AGAAATGACTTCCCT	1	-1.575	0.2968	16	0.0016	49	0.0012
AT2G28920(ND)/col-AT2G28920-DAP-Seq(GSE60143)/Homer	WAGATATTTWTW	1	-1.547	0.305	751	0.0734	2825.9	0.0713
p53(p53)/Saos-p53-ChIP-Seq(GSE15780)/Homer	RRCATGYCYRGRCATGYYYN	1	-1.545	0.305	145	0.0142	524.8	0.0133
p53(p53)/Saos-p53-ChIP-Seq/Homer	RRCATGYCYRGRCATGYYYN	1	-1.545	0.305	145	0.0142	524.8	0.0133
ZNF165(Zf)/WHIM12-ZNF165-ChIP-Seq(GSE65937)/Homer	AAGGKGRCGCAGGCA	1	-1.537	0.3065	208	0.0203	761.5	0.0192
AT3G10113(MYBrelated)/col-AT3G10113-DAP-Seq(GSE60143)/Homer	WNAAATATCWWN	1	-1.53	0.3083	1190	0.1163	4507.6	0.1138
ATHB21(HB)/colamp-ATHB21-DAP-Seq(GSE60143)/Homer	YCAATWAT	1	-1.488	0.321	1275	0.1246	4837.1	0.1221
AT4G12670(MYBrelated)/col-AT4G12670-DAP-Seq(GSE60143)/Homer	AGGGTTTAGGGTTTA	1	-1.48	0.3233	1	0.0001	1.6	0
Tbx21(T-box)/GM12878-TBX21-ChIP-Seq(Encode)/Homer	AGGTGTGAAA	1	-1.48	0.3233	2077	0.203	7921	0.2
NTM1(NAC)/col-NTM1-DAP-Seq(GSE60143)/Homer	ACTTRTARAASAAGT	1	-1.471	0.3251	899	0.0879	3397.6	0.0858
Unknown4/Drosophila-Promoters/Homer	AAAAATACCRMA	1	-1.465	0.3266	339	0.0331	1260.3	0.0318
MYB51(MYB)/col-MYB51-DAP-Seq(GSE60143)/Homer	GGTAGGTG	1	-1.458	0.3287	1425	0.1393	5416.6	0.1368
REF6(Zf)/Arabidopsis-REF6-ChIP-Seq(GSE106942)/Homer	TVCTCTGTTT	1	-1.454	0.3294	1209	0.1182	4587	0.1158
ZML2(C2C2gata)/col-ZML2-DAP-Seq(GSE60143)/Homer	CATCATCATC	1	-1.416	0.3416	477	0.0466	1788.7	0.0452
GRHL2(CP2)/HBE-GRHL2-ChIP-Seq(GSE46194)/Homer	AAACYKGTTWDACMRGTTTB	1	-1.416	0.3416	676	0.0661	2548.2	0.0643
ERF11(AP2EREBP)/col-ERF11-DAP-Seq(GSE60143)/Homer	RTGGCGGCGG	1	-1.409	0.343	421	0.0411	1575.4	0.0398
ZNF382(Zf)/HEK293-ZNF382.GFP-ChIP-Seq(GSE58341)/Homer	GNCTGTASTRNTGBCTCHTT	1	-1.408	0.343	47	0.0046	163.5	0.0041
NRF1(NRF)/MCF7-NRF1-ChIP-Seq(Unpublished)/Homer	CTGCGCATGCGC	1	-1.408	0.343	41	0.004	141.6	0.0036
AT1G10720(BSD)/col-AT1G10720-DAP-Seq(GSE60143)/Homer	TTCTAGAAKCTTCTA	1	-1.366	0.3566	63	0.0062	223.2	0.0056
MYB13(MYB)/col-MYB13-DAP-Seq(GSE60143)/Homer	HYCACCWACCHH	1	-1.36	0.3583	1210	0.1183	4600.3	0.1162
Egr2(Zf)/Thymocytes-Egr2-ChIP-Seq(GSE34254)/Homer	NGCGTGGGCGGR	1	-1.352	0.3607	174	0.017	640.1	0.0162
DEL1(E2FDP)/colamp-DEL1-DAP-Seq(GSE60143)/Homer	TTCCCGCCAA	1	-1.346	0.3625	4	0.0004	10.8	0.0003
ANL2(HB)/col-ANL2-DAP-Seq(GSE60143)/Homer	CATTAATTGC	1	-1.337	0.3649	1455	0.1422	5544.1	0.14
At2g44940(AP2EREBP)/colamp-At2g44940-DAP-Seq(GSE60143)/Homer	NYACCGACAHNNNNN	1	-1.332	0.3665	129	0.0126	471	0.0119
NAC2(NAC)/colamp-NAC2-DAP-Seq(GSE60143)/Homer	TDCTTGNNNNNCAAG	1	-1.323	0.3693	1095	0.107	4162.3	0.1051
CUC3(NAC)/col-CUC3-DAP-Seq(GSE60143)/Homer	TRCKTGWNNNACAMG	1	-1.312	0.3728	481	0.047	1810.6	0.0457
AS2(LOBAS2)/col-AS2-DAP-Seq(GSE60143)/Homer	CCGDAAWWHMCGSCG	1	-1.302	0.3759	18	0.0018	59.4	0.0015
CDF3(C2C2dof)/colamp-CDF3-DAP-Seq(GSE60143)/Homer	AAAAGTRM	1	-1.292	0.3793	4001	0.391	15371.7	0.3881
RAP212(AP2EREBP)/col-RAP212-DAP-Seq(GSE60143)/Homer	CGCCGCCATTTT	1	-1.292	0.3793	357	0.0349	1338.5	0.0338
ERF4(AP2EREBP)/colamp-ERF4-DAP-Seq(GSE60143)/Homer	WDWTGGCGGCGG	1	-1.286	0.3806	565	0.0552	2133.8	0.0539
MGP(C2H2)/colamp-MGP-DAP-Seq(GSE60143)/Homer	TTTTGTCGTTTW	1	-1.282	0.3815	481	0.047	1812.5	0.0458
SCRT1(Zf)/HEK293-SCRT1.eGFP-ChIP-Seq(Encode)/Homer	GCAACAGGTG	1	-1.274	0.384	541	0.0529	2042.5	0.0516
MYB3R5(MYB)/col-MYB3R5-DAP-Seq(GSE60143)/Homer	THYAACGGTHAWAWT	1	-1.264	0.3872	92	0.009	334	0.0084
TINY(AP2EREBP)/col-TINY-DAP-Seq(GSE60143)/Homer	NNCACCGACA	1	-1.261	0.3878	149	0.0146	549.5	0.0139
ANAC103(NAC)/col-ANAC103-DAP-Seq(GSE60143)/Homer	AACTTGNWNWNCAAG	1	-1.252	0.391	603	0.0589	2281.5	0.0576
Srebp2(bHLH)/HepG2-Srebp2-ChIP-Seq(GSE31477)/Homer	CGGTCACSCCAC	1	-1.23	0.3991	218	0.0213	813	0.0205
DEAR3(AP2EREBP)/colamp-DEAR3-DAP-Seq(GSE60143)/Homer	BCACCGACAWNNNNN	1	-1.221	0.402	205	0.02	763.1	0.0193
Nkx2.5(Homeobox)/HL1-Nkx2.5.biotin-ChIP-Seq(GSE21529)/Homer	RRSCACTYAA	1	-1.196	0.4118	4027	0.3936	15487.1	0.391
ANAC094(NAC)/col-ANAC094-DAP-Seq(GSE60143)/Homer	DVCGTRNNNNNYACG	1	-1.191	0.4134	143	0.014	529.9	0.0134
At1g68670(G2like)/colamp-At1g68670-DAP-Seq(GSE60143)/Homer	WNWWHNRAAGATTCT	1	-1.178	0.418	1329	0.1299	5077.8	0.1282
AGL25(MADS)/colamp-AGL25-DAP-Seq(GSE60143)/Homer	TTTCCATWTWTGGAA	1	-1.175	0.4189	146	0.0143	541.2	0.0137
ARE(NR)/LNCAP-AR-ChIP-Seq(GSE27824)/Homer	RGRACASNSTGTYCYB	1	-1.138	0.434	405	0.0396	1531.4	0.0387
CBF2(AP2EREBP)/colamp-CBF2-DAP-Seq(GSE60143)/Homer	YBRCCGACATNNNNN	1	-1.131	0.4363	271	0.0265	1019.6	0.0257
RVE1(MYBrelated)/col-RVE1-DAP-Seq(GSE60143)/Homer	AAATATCT	1	-1.129	0.4369	1449	0.1416	5545.4	0.14
LBD23(LOBAS2)/colamp-LBD23-DAP-Seq(GSE60143)/Homer	GCGNAWWWTNCGCYW	1	-1.102	0.4483	890	0.087	3396.5	0.0858
Mouse_Recombination_Hotspot(Zf)/Testis-DMC1-ChIP-Seq(GSE24438)/Homer	ACTYKNATTCGTGNTACTTC	1	-1.081	0.457	140	0.0137	522	0.0132
At4g38000(C2C2dof)/col-At4g38000-DAP-Seq(GSE60143)/Homer	WWWTWACTTTTT	1	-1.08	0.457	3104	0.3034	11939.5	0.3015
At4g16750(AP2EREBP)/col-At4g16750-DAP-Seq(GSE60143)/Homer	HACCGACAHA	1	-1.069	0.461	458	0.0448	1739.6	0.0439
LIN-15B(Zf)/cElegans-L3-LIN15B-ChIP-Seq(modEncode)/Homer	CARTGGAGCGCRYTTGCATT	1	-1.059	0.4652	5	0.0005	15.1	0.0004
AT1G71450(AP2EREBP)/col-AT1G71450-DAP-Seq(GSE60143)/Homer	DHDWTGTCGGTG	1	-1.059	0.4652	1012	0.0989	3870.2	0.0977
AGL95(ND)/col-AGL95-DAP-Seq(GSE60143)/Homer	TTCTAGAAGCTTCTA	1	-1.056	0.4653	227	0.0222	855.8	0.0216
dHNF4(NR)/Fly-HNF4-ChIP-Seq(GSE73675)/Homer	GGTCCAAAGTCCAMT	1	-1.055	0.4653	76	0.0074	280.2	0.0071
At5g08330(TCP)/col-At5g08330-DAP-Seq(GSE60143)/Homer	GGRCCCAC	1	-1.051	0.4664	944	0.0923	3609.3	0.0911
ERF104(AP2EREBP)/col-ERF104-DAP-Seq(GSE60143)/Homer	GGCGGCGG	1	-1.044	0.4692	470	0.0459	1787.4	0.0451
DEAR5(AP2EREBP)/col-DEAR5-DAP-Seq(GSE60143)/Homer	NDWTGTCGGTGRWDN	1	-1.032	0.474	89	0.0087	330.8	0.0084
AT4G26030(C2H2)/col-AT4G26030-DAP-Seq(GSE60143)/Homer	BYYACCWACY	1	-1.03	0.4742	1760	0.172	6757.7	0.1706
Pbx3(Homeobox)/GM12878-PBX3-ChIP-Seq(GSE32465)/Homer	SCTGTCAMTCAN	1	-1.026	0.4756	441	0.0431	1677.7	0.0424
OCT4-SOX2-TCF-NANOG(POU,Homeobox,HMG)/mES-Oct4-ChIP-Seq(GSE11431)/Homer	ATTTGCATAACAATG	1	-1.021	0.4777	475	0.0464	1808.7	0.0457
CUC2(NAC)/colamp-CUC2-DAP-Seq(GSE60143)/Homer	TRCKTGTNNNWCAMG	1	-1.018	0.4784	445	0.0435	1693.3	0.0428
At4g28140(AP2EREBP)/colamp-At4g28140-DAP-Seq(GSE60143)/Homer	DCCACCGACCAW	1	-1.017	0.4784	171	0.0167	643.9	0.0163
NGA4(ABI3VP1)/col-NGA4-DAP-Seq(GSE60143)/Homer	TKNTCAGGTG	1	-1.002	0.4846	4422	0.4322	17049.2	0.4305
TCP7(TCP)/col-TCP7-DAP-Seq(GSE60143)/Homer	GTGGGSCCCACHHNN	1	-0.995	0.4874	756	0.0739	2891.1	0.073
HSFB3(HSF)/colamp-HSFB3-DAP-Seq(GSE60143)/Homer	TTCTAGAAGMTTHTW	1	-0.9888	0.4898	145	0.0142	545.9	0.0138
GATA19(C2C2gata)/colamp-GATA19-DAP-Seq(GSE60143)/Homer	ATCSGATCVG	1	-0.9882	0.4898	102	0.01	381.4	0.0096
AT1G77200(AP2EREBP)/colamp-AT1G77200-DAP-Seq(GSE60143)/Homer	ACCGACAHWD	1	-0.9812	0.4922	463	0.0453	1765.6	0.0446
VND6(NAC)/col-VND6-DAP-Seq(GSE60143)/Homer	DCTTNHTTTTYAMGY	1	-0.9683	0.498	1638	0.1601	6295	0.1589
GRE(NR),IR3/RAW264.7-GRE-ChIP-Seq(Unpublished)/Homer	VAGRACAKWCTGTYC	1	-0.9679	0.498	393	0.0384	1497.3	0.0378
At4g32800(AP2EREBP)/colamp-At4g32800-DAP-Seq(GSE60143)/Homer	DYCACCGACAHWWWH	1	-0.9658	0.498	70	0.0068	260.2	0.0066
AGL13(MADS)/col-AGL13-DAP-Seq(GSE60143)/Homer	TWCCAWWTWTGGWAA	1	-0.9656	0.498	112	0.0109	420.5	0.0106
ANAC087(NAC)/col-ANAC087-DAP-Seq(GSE60143)/Homer	WVCKTGHNNNWCAMG	1	-0.9577	0.5006	366	0.0358	1394.5	0.0352
OCT:OCT(POU,Homeobox,IR1)/NPC-Brn2-ChIP-Seq(GSE35496)/Homer	ATGAATWATTCATGA	1	-0.9477	0.505	48	0.0047	177.1	0.0045
MYB121(MYB)/col-MYB121-DAP-Seq(GSE60143)/Homer	YNTACCTAACWW	1	-0.9464	0.505	708	0.0692	2711.3	0.0685
MYB93(MYB)/colamp-MYB93-DAP-Seq(GSE60143)/Homer	GGTAGGTGRD	1	-0.9399	0.5076	2022	0.1976	7782.1	0.1965
VND2(NAC)/col-VND2-DAP-Seq(GSE60143)/Homer	DNCKTNNNNNNNAAG	1	-0.9311	0.5114	1447	0.1414	5563.8	0.1405
At5g65130(AP2EREBP)/colamp-At5g65130-DAP-Seq(GSE60143)/Homer	CCRCCGACAWTN	1	-0.9249	0.5139	110	0.0108	414.6	0.0105
GATA12(C2C2gata)/col-GATA12-DAP-Seq(GSE60143)/Homer	YAGATCTRAW	1	-0.9236	0.514	945	0.0924	3627.5	0.0916
Phox2a(Homeobox)/Neuron-Phox2a-ChIP-Seq(GSE31456)/Homer	YTAATYNRATTA	1	-0.9201	0.5151	1060	0.1036	4071.3	0.1028
Nr5a2(NR)/mES-Nr5a2-ChIP-Seq(GSE19019)/Homer	BTCAAGGTCA	1	-0.9191	0.5151	865	0.0845	3319.5	0.0838
At5g52660(MYBrelated)/colamp-At5g52660-DAP-Seq(GSE60143)/Homer	HAAAAATATCTW	1	-0.9073	0.5203	1263	0.1234	4856	0.1226
Esrrb(NR)/mES-Esrrb-ChIP-Seq(GSE11431)/Homer	KTGACCTTGA	1	-0.8969	0.5251	1123	0.1098	4317.7	0.109
E2FA(E2FDP)/colamp-E2FA-DAP-Seq(GSE60143)/Homer	WWTGGCGCCAWWWNN	1	-0.8921	0.527	306	0.0299	1168.1	0.0295
CTCF-SatelliteElement(Zf?)/CD4+-CTCF-ChIP-Seq(Barski_et_al.)/Homer	TGCAGTTCCMVNWRTGGCCA	1	-0.8831	0.5303	22	0.0022	80.8	0.002
EBNA1(EBV-virus)/Raji-EBNA1-ChIP-Seq(GSE30709)/Homer	GGYAGCAYDTGCTDCCCNNN	1	-0.8831	0.5303	22	0.0022	81	0.002
MYB61(MYB)/colamp-MYB61-DAP-Seq(GSE60143)/Homer	HCYACCTACC	1	-0.8738	0.5346	2577	0.2519	9938.2	0.2509
MYB17(MYB)/colamp-MYB17-DAP-Seq(GSE60143)/Homer	GGTAGGTGRG	1	-0.8569	0.543	916	0.0895	3523.6	0.089
bHLH18(bHLH)/col-bHLH18-DAP-Seq(GSE60143)/Homer	CACGTGTTYCACGTG	1	-0.852	0.545	20	0.002	73	0.0018
ERF2(AP2EREBP)/colamp-ERF2-DAP-Seq(GSE60143)/Homer	GGCGGCTG	1	-0.8428	0.5493	269	0.0263	1029.3	0.026
SeqBias: CG-repeat	CGCGCGCGCG	1	-0.8422	0.5493	629	0.0615	2417.5	0.061
Unknown1(NR/Ini-like)/Drosophila-Promoters/Homer	MYGGTCACACTG	1	-0.827	0.5566	338	0.033	1297	0.0327
AT4G18450(AP2EREBP)/col-AT4G18450-DAP-Seq(GSE60143)/Homer	ATGGCGGCKG	1	-0.8226	0.5584	184	0.018	703.6	0.0178
ZNF41(Zf)/HEK293-ZNF41.GFP-ChIP-Seq(GSE58341)/Homer	CCTCATGGTGYCYTWYTCCCTTGTG	1	-0.8107	0.5643	41	0.004	154.9	0.0039
VND1(NAC)/col-VND1-DAP-Seq(GSE60143)/Homer	CTTRWDNHWYAAGYW	1	-0.8099	0.5643	1304	0.1274	5028.2	0.127
Oct11(POU,Homeobox)/NCIH1048-POU2F3-ChIP-seq(GSE115123)/Homer	GATTTGCATA	1	-0.801	0.5684	740	0.0723	2850.8	0.072
ABF1(bZIP)/Arabidopsis-ABF1-ChIP-Seq(GSE80564)/Homer	CACGTGGC	1	-0.7993	0.5686	1160	0.1134	4473.6	0.113
At3g09600(MYBrelated)/colamp-At3g09600-DAP-Seq(GSE60143)/Homer	AAAATATCTT	1	-0.7987	0.5686	1242	0.1214	4790.5	0.121
Zfp57(Zf)/H1-ZFP57.HA-ChIP-Seq(GSE115387)/Homer	NANTGCSGCA	1	-0.7955	0.5693	299	0.0292	1148.2	0.029
EPR1(MYBrelated)/colamp-EPR1-DAP-Seq(GSE60143)/Homer	AAATATCT	1	-0.7874	0.5725	965	0.0943	3721	0.094
LHY1(MYBrelated)/col-LHY1-DAP-Seq(GSE60143)/Homer	AAATATCT	1	-0.7874	0.5725	965	0.0943	3721	0.094
ATHB53(HB)/col-ATHB53-DAP-Seq(GSE60143)/Homer	CAATAATT	1	-0.7732	0.58	1450	0.1417	5598.7	0.1414
GATA15(C2C2gata)/col-GATA15-DAP-Seq(GSE60143)/Homer	KATGATCA	1	-0.7717	0.5801	2648	0.2588	10232	0.2583
DDF1(AP2EREBP)/col-DDF1-DAP-Seq(GSE60143)/Homer	GCCGACAT	1	-0.7706	0.5801	241	0.0236	926.1	0.0234
ESE3(AP2EREBP)/col-ESE3-DAP-Seq(GSE60143)/Homer	GACGGTGG	1	-0.765	0.5826	660	0.0645	2545.6	0.0643
HSFB4(HSF)/col-HSFB4-DAP-Seq(GSE60143)/Homer	TTCTAGAAGCTTCTA	1	-0.739	0.5971	76	0.0074	291.5	0.0074
Rap210(AP2EREBP)/col-Rap210-DAP-Seq(GSE60143)/Homer	TGTCGGCA	1	-0.7389	0.5971	346	0.0338	1334.3	0.0337
JKD(C2H2)/col-JKD-DAP-Seq(GSE60143)/Homer	TTTTGTCGTTTT	1	-0.7389	0.5971	398	0.0389	1535.2	0.0388
Oct2(POU,Homeobox)/Bcell-Oct2-ChIP-Seq(GSE21512)/Homer	ATATGCAAAT	1	-0.7336	0.5981	702	0.0686	2712	0.0685
SMB(NAC)/colamp-SMB-DAP-Seq(GSE60143)/Homer	CTTVNNNNDBAAGHW	1	-0.7244	0.6029	1457	0.1424	5633.2	0.1422
IDD7(C2H2)/col-IDD7-DAP-Seq(GSE60143)/Homer	TTTGTCKTTTTN	1	-0.712	0.6097	829	0.081	3205.3	0.0809
AT1G12630(AP2EREBP)/colamp-AT1G12630-DAP-Seq(GSE60143)/Homer	TGTCGGCA	1	-0.6724	0.6335	313	0.0306	1212.5	0.0306
TFE3(bHLH)/MEF-TFE3-ChIP-Seq(GSE75757)/Homer	GTCACGTGACYV	1	-0.6458	0.6497	101	0.0099	392.9	0.0099
EIN3(EIL)/col-EIN3-DAP-Seq(GSE60143)/Homer	ARATTCAATGWATYT	1	-0.6364	0.655	339	0.0331	1316.9	0.0332
At2g45680(TCP)/colamp-At2g45680-DAP-Seq(GSE60143)/Homer	GTGGGNCCCACNDND	1	-0.6331	0.6564	98	0.0096	381.9	0.0096
SeqBias: G/A bias	RRRRRRRRRR	1	-0.614	0.6683	10231	0.9999	39600	0.9998
AT1G23810(Orphan)/col-AT1G23810-DAP-Seq(GSE60143)/Homer	TTCTAGAAGSTTCTA	1	-0.5955	0.6799	88	0.0086	344.6	0.0087
E-box/Arabidopsis-Promoters/Homer	GCCACGTG	1	-0.5917	0.6816	537	0.0525	2089.4	0.0528
GATA1(C2C2gata)/colamp-GATA1-DAP-Seq(GSE60143)/Homer	DDWWYYAGATCTRRW	1	-0.5884	0.683	641	0.0626	2493	0.0629
ANAC013(NAC)/col-ANAC013-DAP-Seq(GSE60143)/Homer	CTTGNNNNNCAAGNA	1	-0.5874	0.683	617	0.0603	2400.4	0.0606
CES-1(Homeobox)/cElegans-L1-CES1-ChIP-Seq(modEncode)/Homer	AAATTSAATTTN	1	-0.5722	0.6925	1485	0.1451	5769.1	0.1457
IDD2(C2H2)/colamp-IDD2-DAP-Seq(GSE60143)/Homer	HAVAAAAMGACAAAA	1	-0.5707	0.6927	280	0.0274	1093.7	0.0276
PIF4(bHLH)/Seedling-PIF4-ChIP-Seq(GSE35315)/Homer	NNBCACGTGN	1	-0.5694	0.6927	2103	0.2055	8165.2	0.2062
ERF1(AP2EREBP)/colamp-ERF1-DAP-Seq(GSE60143)/Homer	GGCGGCTR	1	-0.5614	0.6974	242	0.0237	946.2	0.0239
AT3G10580(MYBrelated)/colamp-AT3G10580-DAP-Seq(GSE60143)/Homer	TACCTAACWNHW	1	-0.5602	0.6974	843	0.0824	3281.9	0.0829
AGL15(MADS)/col-AGL15-DAP-Seq(GSE60143)/Homer	TTTCCHWATWDGGAA	1	-0.558	0.698	363	0.0355	1417.3	0.0358
PRDM9(Zf)/Testis-DMC1-ChIP-Seq(GSE35498)/Homer	ADGGYAGYAGCATCT	1	-0.5564	0.6983	755	0.0738	2940.6	0.0742
FOXA1:AR(Forkhead,NR)/LNCAP-AR-ChIP-Seq(GSE27824)/Homer	AGTAAACAAAAAAGAACAND	1	-0.555	0.6985	121	0.0118	475.8	0.012
ZBTB33(Zf)/GM12878-ZBTB33-ChIP-Seq(GSE32465)/Homer	GGVTCTCGCGAGAAC	1	-0.5392	0.7087	11	0.0011	44.4	0.0011
GATA20(C2C2gata)/colamp-GATA20-DAP-Seq(GSE60143)/Homer	TNGATCNDNM	1	-0.5328	0.7124	3586	0.3505	13920.4	0.3515
Sox2(HMG)/mES-Sox2-ChIP-Seq(GSE11431)/Homer	BCCATTGTTC	1	-0.5253	0.7169	1680	0.1642	6535.2	0.165
NTM2(NAC)/col-NTM2-DAP-Seq(GSE60143)/Homer	CTTRTNNNAYAAGBH	1	-0.5243	0.7169	910	0.0889	3547.9	0.0896
TATA-Box(TBP)/Promoter/Homer	CCTTTTAWAGSC	1	-0.5198	0.7191	2675	0.2614	10394.9	0.2625
ANAC092(NAC)/colamp-ANAC092-DAP-Seq(GSE60143)/Homer	WRCKTGWNNNWCAMG	1	-0.5166	0.7205	552	0.0539	2157.5	0.0545
AT3G16280(AP2EREBP)/colamp-AT3G16280-DAP-Seq(GSE60143)/Homer	HCACCGACAHHDHHN	1	-0.51	0.7244	197	0.0193	775.2	0.0196
MYB39(MYB)/col-MYB39-DAP-Seq(GSE60143)/Homer	WWAARKTAGGTGRAA	1	-0.5036	0.7282	334	0.0326	1310.8	0.0331
ANAC020(NAC)/col-ANAC020-DAP-Seq(GSE60143)/Homer	DVCKTGHNNNDCAAG	1	-0.5012	0.729	910	0.0889	3551	0.0897
VND4(NAC)/colamp-VND4-DAP-Seq(GSE60143)/Homer	WRCTTGWANWWCAAG	1	-0.4958	0.7321	1101	0.1076	4294.2	0.1084
GT3a(Trihelix)/col-GT3a-DAP-Seq(GSE60143)/Homer	WNACACGTGTYWWAW	1	-0.4878	0.7371	281	0.0275	1105.3	0.0279
ZML1(C2C2gata)/colamp-ZML1-DAP-Seq(GSE60143)/Homer	ATCWYRACCGTTSRW	1	-0.4854	0.738	9	0.0009	37.6	0.001
SPL5(SBP)/colamp-SPL5-DAP-Seq(GSE60143)/Homer	NNHGTACGGHNN	1	-0.4844	0.738	385	0.0376	1511.7	0.0382
PBX1(Homeobox)/MCF7-PBX1-ChIP-Seq(GSE28007)/Homer	GSCTGTCACTCA	1	-0.478	0.7416	135	0.0132	536	0.0135
DMRT1(DM)/Testis-DMRT1-ChIP-Seq(GSE64892)/Homer	TWGHWACAWTGTWDC	1	-0.4689	0.7476	473	0.0462	1856.9	0.0469
ERF73(AP2EREBP)/col-ERF73-DAP-Seq(GSE60143)/Homer	CCGCCGCC	1	-0.4653	0.7493	285	0.0279	1123	0.0284
SeqBias: GCW-triplet	GCWGCWGCWGCW	1	-0.4624	0.7506	10231	0.9999	39601.2	0.9999
AT4G27900(C2C2COlike)/col-AT4G27900-DAP-Seq(GSE60143)/Homer	TCTCVACCGTTSATT	1	-0.4608	0.7509	5	0.0005	21.8	0.0005
Sox17(HMG)/Endoderm-Sox17-ChIP-Seq(GSE61475)/Homer	CCATTGTTYB	1	-0.4591	0.7512	1435	0.1402	5599.4	0.1414
CBF3(AP2EREBP)/colamp-CBF3-DAP-Seq(GSE60143)/Homer	YNRCCGACATNN	1	-0.4587	0.7512	260	0.0254	1026.6	0.0259
MYB67(MYB)/col-MYB67-DAP-Seq(GSE60143)/Homer	YYYACCTAAC	1	-0.445	0.7601	1713	0.1674	6682.7	0.1687
MYB99(MYB)/colamp-MYB99-DAP-Seq(GSE60143)/Homer	GGTAGGTG	1	-0.4416	0.7618	1531	0.1496	5976.4	0.1509
HSF21(HSF)/col-HSF21-DAP-Seq(GSE60143)/Homer	CTTCTAGAAGMTTYW	1	-0.4412	0.7618	211	0.0206	836.3	0.0211
CRF10(AP2EREBP)/col100-CRF10-DAP-Seq(GSE60143)/Homer	DCCGCCGYHA	1	-0.4363	0.764	489	0.0478	1923.3	0.0486
MYB74(MYB)/colamp-MYB74-DAP-Seq(GSE60143)/Homer	YYYACCTACCWH	1	-0.4348	0.7643	1176	0.1149	4598.1	0.1161
DUX4(Homeobox)/Myoblasts-DUX4.V5-ChIP-Seq(GSE75791)/Homer	NWTAAYCYAATCAWN	1	-0.4276	0.7689	100	0.0098	401.2	0.0101
SND3(NAC)/col-SND3-DAP-Seq(GSE60143)/Homer	CTTNHNNNDNAAGNH	1	-0.4257	0.7694	1140	0.1114	4460.6	0.1126
DUX(Homeobox)/C2C12-Dux-ChIP-Seq(GSE87279)/Homer	BCWGATTCAATCAAN	1	-0.4227	0.7708	7	0.0007	30.6	0.0008
ANAC053(NAC)/colamp-ANAC053-DAP-Seq(GSE60143)/Homer	TDCTTGNNNNNCAAG	1	-0.4218	0.7708	777	0.0759	3048.1	0.077
ESE1(AP2EREBP)/col-ESE1-DAP-Seq(GSE60143)/Homer	GGCGGCGG	1	-0.4093	0.7794	313	0.0306	1239.4	0.0313
ANAC062(NAC)/colamp-ANAC062-DAP-Seq(GSE60143)/Homer	TACTTANTNWNYAAG	1	-0.4031	0.7833	654	0.0639	2572.2	0.0649
ERF10(AP2EREBP)/col-ERF10-DAP-Seq(GSE60143)/Homer	RTGGCGGCGG	1	-0.3891	0.7934	332	0.0324	1317	0.0333
ZNF692(Zf)/HEK293-ZNF692.GFP-ChIP-Seq(GSE58341)/Homer	GTGGGCCCCA	1	-0.3888	0.7934	216	0.0211	861.7	0.0218
CUC1(NAC)/col-CUC1-DAP-Seq(GSE60143)/Homer	TACTTGTNNNACAAG	1	-0.3867	0.7935	602	0.0588	2372.3	0.0599
AT1G04880(ARID)/colamp-AT1G04880-DAP-Seq(GSE60143)/Homer	AAACTATATADTATA	1	-0.3861	0.7935	337	0.0329	1336	0.0337
ERF3(AP2EREBP)/colamp-ERF3-DAP-Seq(GSE60143)/Homer	ATGGCGGCGG	1	-0.3777	0.7988	301	0.0294	1196.4	0.0302
SF1(NR)/H295R-Nr5a1-ChIP-Seq(GSE44220)/Homer	CAAGGHCANV	1	-0.3773	0.7988	733	0.0716	2885.3	0.0729
Tbx6(T-box)/ESC-Tbx6-ChIP-Seq(GSE93524)/Homer	DAGGTGTBAA	1	-0.3719	0.8015	2052	0.2005	8019.2	0.2025
Sox3(HMG)/NPC-Sox3-ChIP-Seq(GSE33059)/Homer	CCWTTGTY	1	-0.3632	0.8076	3297	0.3222	12855	0.3246
At1g14580(C2H2)/colamp-At1g14580-DAP-Seq(GSE60143)/Homer	CASAAAAMGACAAAA	1	-0.3537	0.8144	382	0.0373	1517.6	0.0383
TCP16(TCP)/colamp-TCP16-DAP-Seq(GSE60143)/Homer	GTGGDCCYNNNNNNN	1	-0.3481	0.8179	917	0.0896	3609.6	0.0911
bHLH28(bHLH)/col-bHLH28-DAP-Seq(GSE60143)/Homer	NHHTGTACGGAH	1	-0.3388	0.8246	193	0.0189	776.3	0.0196
ANAC028(NAC)/col-ANAC028-DAP-Seq(GSE60143)/Homer	WRCTTGNNNNNCAAG	1	-0.3268	0.8336	1109	0.1084	4363.7	0.1102
ANAC075(NAC)/col-ANAC075-DAP-Seq(GSE60143)/Homer	CTTSWWNWWSAAGYT	1	-0.3262	0.8336	476	0.0465	1890.5	0.0477
CBF1(AP2EREBP)/colamp-CBF1-DAP-Seq(GSE60143)/Homer	YRCCGACATN	1	-0.3236	0.8344	365	0.0357	1455.3	0.0367
Ronin(THAP)/ES-Thap11-ChIP-Seq(GSE51522)/Homer	RACTACAACTCCCAGVAKGC	1	-0.313	0.8422	13	0.0013	58.4	0.0015
E-box(bHLH)/Promoter/Homer	SSGGTCACGTGA	1	-0.3129	0.8422	70	0.0068	290.3	0.0073
ZNF136(Zf)/HEK293-ZNF136.GFP-ChIP-Seq(GSE58341)/Homer	YTKGATAHAGTATTCTWGGTNGGCA	1	-0.3055	0.8467	192	0.0188	776.1	0.0196
At1g69690(TCP)/colamp-At1g69690-DAP-Seq(GSE60143)/Homer	NHGTGGGGCCCACHW	1	-0.3054	0.8467	350	0.0342	1399.1	0.0353
ANAC071(NAC)/col-ANAC071-DAP-Seq(GSE60143)/Homer	DNCKTNDNNNHNAAG	1	-0.3044	0.8467	1289	0.126	5071.2	0.128
E2F(E2F)/Hela-CellCycle-Expression/Homer	TTSGCGCGAAAA	1	-0.2972	0.8508	29	0.0028	126	0.0032
SPL13(SBP)/col-SPL13-DAP-Seq(GSE60143)/Homer	WAHTGTACGGAH	1	-0.2948	0.8518	57	0.0056	239.1	0.006
TATA-box/Drosophila-Promoters/Homer	CTATAAAAGCSV	1	-0.2939	0.8518	145	0.0142	591.8	0.0149
EIL4(EIL)/Tomato-EIL4-ChIP-Seq(GSE116581)/Homer	GATTCAWTGAAT	1	-0.2884	0.8553	220	0.0215	889.8	0.0225
CDM1(C3H)/colamp-CDM1-DAP-Seq(GSE60143)/Homer	CCGAWAWTWTCGGAN	1	-0.2879	0.8553	73	0.0071	304.8	0.0077
ANAC050(NAC)/colamp-ANAC050-DAP-Seq(GSE60143)/Homer	WNCTTGNNNNNCAAG	1	-0.281	0.8597	815	0.0797	3227.3	0.0815
ERF5(AP2EREBP)/colamp-ERF5-DAP-Seq(GSE60143)/Homer	DCMGCCGCCA	1	-0.2801	0.8597	168	0.0164	684.3	0.0173
KANADI1(Myb)/Seedling-KAN1-ChIP-Seq(GSE48081)/Homer	ARGAATAWWN	1	-0.2765	0.8616	2880	0.2815	11270.7	0.2846
BIM2(bHLH)/col-BIM2-DAP-Seq(GSE60143)/Homer	NNNNCACGTGNN	1	-0.2717	0.8647	1440	0.1407	5671	0.1432
TCP17(TCP)/col-TCP17-DAP-Seq(GSE60143)/Homer	GTGGTCCCCA	1	-0.2615	0.8726	67	0.0065	282.8	0.0071
MYB40(MYB)/col-MYB40-DAP-Seq(GSE60143)/Homer	TGGTAGGTRARA	1	-0.2607	0.8726	624	0.061	2485	0.0627
Ik-1	NHTTGGGAATRCC	1	-0.2583	0.8734	10232	1	39606.1	1
CAMTA5(CAMTA)/col-CAMTA5-DAP-Seq(GSE60143)/Homer	ACGCGTTTTANACRC	1	-0.2519	0.878	300	0.0293	1211.4	0.0306
ANAC058(NAC)/col-ANAC058-DAP-Seq(GSE60143)/Homer	TWCTTGTDNNACAAG	1	-0.2517	0.878	849	0.083	3368.8	0.0851
AT5G59990(C2C2COlike)/colamp-AT5G59990-DAP-Seq(GSE60143)/Homer	TCTCAACCGTTCATT	1	-0.2496	0.878	25	0.0024	111.5	0.0028
VND3(NAC)/colamp-VND3-DAP-Seq(GSE60143)/Homer	TRCTTGWDNHWCAAG	1	-0.2476	0.8788	1056	0.1032	4179.1	0.1055
NUC(C2H2)/col-NUC-DAP-Seq(GSE60143)/Homer	HAVAAAACGACAAAA	1	-0.2328	0.8909	188	0.0184	770.2	0.0194
AT2G20400(G2like)/colamp-AT2G20400-DAP-Seq(GSE60143)/Homer	DNVGAATATTCBNHN	1	-0.2314	0.8912	294	0.0287	1191.3	0.0301
Nkx2.2(Homeobox)/NPC-Nkx2.2-ChIP-Seq(GSE61673)/Homer	BTBRAGTGSN	1	-0.2224	0.8982	3433	0.3355	13443.9	0.3394
BAM8(BES1)/col-BAM8-DAP-Seq(GSE60143)/Homer	NNWSACACGTGTSWN	1	-0.2207	0.8987	176	0.0172	724.4	0.0183
PRDM14(Zf)/H1-PRDM14-ChIP-Seq(GSE22767)/Homer	RGGTCTCTAACY	1	-0.2192	0.8991	498	0.0487	1999.1	0.0505
CRF4(AP2EREBP)/colamp-CRF4-DAP-Seq(GSE60143)/Homer	CGCCGCCA	1	-0.2184	0.8991	204	0.0199	836.7	0.0211
AT1G20910(ARID)/col-AT1G20910-DAP-Seq(GSE60143)/Homer	THAATTRAWN	1	-0.2172	0.8991	3558	0.3477	13931.3	0.3517
SeqBias: C/A-bias	MMMMMMMMMM	1	-0.2012	0.9123	10231	0.9999	39603.6	0.9999
TSO1(CPP)/col-TSO1-DAP-Seq(GSE60143)/Homer	RAATTTRAAW	1	-0.1994	0.9129	382	0.0373	1547	0.0391
Tcf3(HMG)/mES-Tcf3-ChIP-Seq(GSE11724)/Homer	ASWTCAAAGG	1	-0.1905	0.92	508	0.0496	2046	0.0517
AT1G19040(NAC)/col-AT1G19040-DAP-Seq(GSE60143)/Homer	CTTGNDNHNCAAGYW	1	-0.1841	0.9249	125	0.0122	525.2	0.0133
ATHB40(HB)/col-ATHB40-DAP-Seq(GSE60143)/Homer	HCAATWATTG	1	-0.1807	0.927	2126	0.2078	8383.5	0.2117
At5g66730(C2H2)/colamp-At5g66730-DAP-Seq(GSE60143)/Homer	TTTGTCKTTTTK	1	-0.1806	0.927	524	0.0512	2112.4	0.0533
WRKY7(WRKY)/colamp-WRKY7-DAP-Seq(GSE60143)/Homer	AAAAGTCAACGSHWD	1	-0.179	0.927	1	0.0001	8	0.0002
At2g03500(G2like)/col-At2g03500-DAP-Seq(GSE60143)/Homer	WWAGAATATTCT	1	-0.1788	0.927	496	0.0485	2003	0.0506
RAR:RXR(NR),DR5/ES-RAR-ChIP-Seq(GSE56893)/Homer	AGGTCAAGGTCA	1	-0.1781	0.927	169	0.0165	703.8	0.0178
NPAS2(bHLH)/Liver-NPAS2-ChIP-Seq(GSE39860)/Homer	KCCACGTGAC	1	-0.1694	0.9323	1754	0.1714	6938.5	0.1752
GFX(?)/Promoter/Homer	ATTCTCGCGAGA	1	-0.1644	0.936	2	0.0002	13.8	0.0003
CLOCK(bHLH)/Liver-Clock-ChIP-Seq(GSE39860)/Homer	GHCACGTG	1	-0.1599	0.9391	744	0.0727	2986.3	0.0754
AGL16(MADS)/col-AGL16-DAP-Seq(GSE60143)/Homer	TWCCHWATWDGGAAA	1	-0.15	0.9474	202	0.0197	841.9	0.0213
REST-NRSF(Zf)/Jurkat-NRSF-ChIP-Seq/Homer	GGMGCTGTCCATGGTGCTGA	1	-0.1464	0.9498	8	0.0008	43.3	0.0011
ZKSCAN1(Zf)/HepG2-ZKSCAN1-ChIP-Seq(Encode)/Homer	GCACAYAGTAGGKCY	1	-0.1457	0.9498	36	0.0035	165.3	0.0042
ANAC096(NAC)/colamp-ANAC096-DAP-Seq(GSE60143)/Homer	TACTTGWNNNWCAAG	1	-0.1451	0.9498	1052	0.1028	4203.1	0.1061
PIF5ox(bHLH)/Arabidopsis-PIF5ox-ChIP-Seq(GSE35062)/Homer	BCACGTGVDN	1	-0.1444	0.9498	1711	0.1672	6784.7	0.1713
GLI3(Zf)/Limb-GLI3-ChIP-Chip(GSE11077)/Homer	CGTGGGTGGTCC	1	-0.142	0.9498	169	0.0165	710.1	0.0179
RRTF1(AP2EREBP)/colamp-RRTF1-DAP-Seq(GSE60143)/Homer	CCGCCGCHATTT	1	-0.1393	0.9513	117	0.0114	500.1	0.0126
SND2(NAC)/colamp-SND2-DAP-Seq(GSE60143)/Homer	CTTVWNNNWBAAGNW	1	-0.1381	0.9515	776	0.0758	3121.1	0.0788
At2g41835(C2H2)/col-At2g41835-DAP-Seq(GSE60143)/Homer	TTTGAAAA	1	-0.1358	0.9526	1356	0.1325	5400.3	0.1364
TATA-box/SacCer-Promoters/Homer	BBHWTATATA	1	-0.1343	0.953	1112	0.1087	4444.2	0.1122
WRKY17(WRKY)/colamp-WRKY17-DAP-Seq(GSE60143)/Homer	GCGTTGACTTTT	1	-0.1339	0.953	7	0.0007	39.9	0.001
FHY3(FAR1)/Arabidopsis-FHY3-ChIP-Seq(GSE30711)/Homer	HHCACGCGCBTN	1	-0.132	0.953	164	0.016	692.4	0.0175
AT1G01250(AP2EREBP)/col-AT1G01250-DAP-Seq(GSE60143)/Homer	YCACCGACAHTW	1	-0.1315	0.953	38	0.0037	175	0.0044
LEF1(HMG)/H1-LEF1-ChIP-Seq(GSE64758)/Homer	CCTTTGATST	1	-0.126	0.9567	1414	0.1382	5633.6	0.1422
MNT(bHLH)/HepG2-MNT-ChIP-Seq(Encode)/Homer	DGCACACGTG	1	-0.1252	0.9567	1700	0.1661	6753.2	0.1705
ANAC017(NAC)/colamp-ANAC017-DAP-Seq(GSE60143)/Homer	TMCTTGNNNNNCAAG	1	-0.1224	0.958	114	0.0111	491.9	0.0124
ANAC005(NAC)/col-ANAC005-DAP-Seq(GSE60143)/Homer	WVCTTVTWNHABAAG	1	-0.1202	0.9591	899	0.0879	3614.5	0.0913
GATA4(C2C2gata)/col-GATA4-DAP-Seq(GSE60143)/Homer	DDWTYAGATCTR	1	-0.1159	0.9622	1239	0.1211	4953.9	0.1251
SHN3(AP2EREBP)/col-SHN3-DAP-Seq(GSE60143)/Homer	CCGCCGCC	1	-0.1152	0.9622	90	0.0088	395	0.01
MYB10(MYB)/col-MYB10-DAP-Seq(GSE60143)/Homer	YCCACCTACCHH	1	-0.1141	0.9622	684	0.0668	2769.2	0.0699
RARg(NR)/ES-RARg-ChIP-Seq(GSE30538)/Homer	AGGTCAAGGTCA	1	-0.1095	0.9652	39	0.0038	182.3	0.0046
HINFP(Zf)/K562-HINFP.eGFP-ChIP-Seq(Encode)/Homer	TWVGGTCCGC	1	-0.1078	0.9659	150	0.0147	641.5	0.0162
AT5G22990(C2H2)/col-AT5G22990-DAP-Seq(GSE60143)/Homer	WCGAHDTCGWHN	1	-0.106	0.9665	41	0.004	191	0.0048
ANAC011(NAC)/col-ANAC011-DAP-Seq(GSE60143)/Homer	TDCTTGYRNNDCAAG	1	-0.1033	0.9681	568	0.0555	2315.4	0.0585
FAR1(FAR1)/col-FAR1-DAP-Seq(GSE60143)/Homer	TKNNNYYCACGCGCY	1	-0.1026	0.9681	43	0.0042	200.1	0.0051
OCT:OCT(POU,Homeobox)/NPC-OCT6-ChIP-Seq(GSE43916)/Homer	YATGCATATRCATRT	1	-0.1015	0.9681	190	0.0186	805.1	0.0203
BPC6(BBRBPC)/col-BPC6-DAP-Seq(GSE60143)/Homer	YTYTCTCTCTCTCTA	1	-0.09825	0.9698	68	0.0066	306.7	0.0077
LOB(LOBAS2)/col-LOB-DAP-Seq(GSE60143)/Homer	CGCCGKAWWTTHCGS	1	-0.09753	0.9698	73	0.0071	327.9	0.0083
Usf2(bHLH)/C2C12-Usf2-ChIP-Seq(GSE36030)/Homer	GTCACGTGGT	1	-0.0888	0.9769	439	0.0429	1809.1	0.0457
CBF4(AP2EREBP)/colamp-CBF4-DAP-Seq(GSE60143)/Homer	NRCCGACDWNNNNNN	1	-0.08744	0.9772	370	0.0362	1534.8	0.0388
GEI-11(Myb?)/cElegans-L4-GEI11-ChIP-Seq(modEncode)/Homer	CCGACAYYTYACGGG	1	-0.08736	0.9772	38	0.0037	182	0.0046
DDF2(AP2EREBP)/col-DDF2-DAP-Seq(GSE60143)/Homer	GATGTCGRCR	1	-0.08174	0.9807	20	0.002	103.4	0.0026
ZNF768(Zf)/Rajj-ZNF768-ChIP-Seq(GSE111879)/Homer	RHHCAGAGAGGB	1	-0.07838	0.983	50	0.0049	234.7	0.0059
SPL14(SBP)/col-SPL14-DAP-Seq(GSE60143)/Homer	NNWHTGTACGGAHNH	1	-0.0755	0.9847	111	0.0108	490.8	0.0124
SPL9(SBP)/colamp-SPL9-DAP-Seq(GSE60143)/Homer	BTGTACTT	1	-0.07351	0.9856	3335	0.3259	13178.6	0.3327
BIM3(bHLH)/col-BIM3-DAP-Seq(GSE60143)/Homer	TWVTCACGTGAB	1	-0.07076	0.9873	131	0.0128	574.7	0.0145
Tcf7(HMG)/GM12878-TCF7-ChIP-Seq(Encode)/Homer	CTTTGATGTGSB	1	-0.06992	0.9873	644	0.0629	2636.6	0.0666
Sox15(HMG)/CPA-Sox15-ChIP-Seq(GSE62909)/Homer	RAACAATGGN	1	-0.06989	0.9873	2056	0.2009	8193.1	0.2069
PUCHI(AP2EREBP)/colamp-PUCHI-DAP-Seq(GSE60143)/Homer	GCGCCGTY	1	-0.06599	0.9889	197	0.0193	846.9	0.0214
OCT:OCT(POU,Homeobox)/NPC-Brn1-ChIP-Seq(GSE35496)/Homer	ATGAATATTCATGAG	1	-0.06426	0.9895	10	0.001	59.3	0.0015
HAP3(CCAATHAP3)/col-HAP3-DAP-Seq(GSE60143)/Homer	TGATGGAW	1	-0.06301	0.9897	647	0.0632	2653.2	0.067
Tcf4(HMG)/Hct116-Tcf4-ChIP-Seq(SRA012054)/Homer	ASATCAAAGGVA	1	-0.05493	0.9967	896	0.0876	3648.1	0.0921
DMRT6(DM)/Testis-DMRT6-ChIP-Seq(GSE60440)/Homer	YDGHTACAWTGTADC	1	-0.05358	0.997	345	0.0337	1452.4	0.0367
SPL3(SBP)/colamp-SPL3-DAP-Seq(GSE60143)/Homer	WDTTGTACGGAH	1	-0.05353	0.997	21	0.0021	112.1	0.0028
ZBTB12(Zf)/HEK293-ZBTB12.GFP-ChIP-Seq(GSE58341)/Homer	NGNTCTAGAACCNGV	1	-0.05074	0.9977	596	0.0582	2460.3	0.0621
PTF1(TCP)/colamp-PTF1-DAP-Seq(GSE60143)/Homer	RDDGGGACCACA	1	-0.05049	0.9977	132	0.0129	586.5	0.0148
DPL-1(E2F)/cElegans-Adult-ChIP-Seq(modEncode)/Homer	TAGCGCGC	1	-0.04737	0.999	292	0.0285	1242.5	0.0314
Sox9(HMG)/Limb-SOX9-ChIP-Seq(GSE73225)/Homer	AGGVNCCTTTGT	1	-0.04356	1	1557	0.1522	6270.8	0.1583
SeqBias: polyC-repeat	CCCCCCCCCC	1	-0.03806	1	10145	0.9915	39327.6	0.993
Max(bHLH)/K562-Max-ChIP-Seq(GSE31477)/Homer	RCCACGTGGYYN	1	-0.03698	1	984	0.0962	4018	0.1014
ERF9(AP2EREBP)/colamp-ERF9-DAP-Seq(GSE60143)/Homer	AWATGGCGGCGG	1	-0.0225	1	81	0.0079	387.5	0.0098
DREF/Drosophila-Promoters/Homer	AVYTATCGATAD	1	-0.02122	1	8	0.0008	57.1	0.0014
LEP(AP2EREBP)/col-LEP-DAP-Seq(GSE60143)/Homer	CDCCGCCGTC	1	-0.01961	1	77	0.0075	372.4	0.0094
Oct4:Sox17(POU,Homeobox,HMG)/F9-Sox17-ChIP-Seq(GSE44553)/Homer	CCATTGTATGCAAAT	1	-0.01842	1	267	0.0261	1168.9	0.0295
At5g29000(G2like)/col-At5g29000-DAP-Seq(GSE60143)/Homer	RGAATATTCYHH	1	-0.01681	1	562	0.0549	2369.4	0.0598
Sox4(HMG)/proB-Sox4-ChIP-Seq(GSE50066)/Homer	YCTTTGTTCC	1	-0.01514	1	1529	0.1494	6224.7	0.1572
Pho2(bHLH)/Yeast-Pho2-ChIP-Seq(GSE29506)/Homer	CCCACGTGCT	1	-0.01499	1	424	0.0414	1815.6	0.0458
Unknown2/Arabidopsis-Promoters/Homer	AAACGACGTCGTTTT	1	-0.0147	1	2	0.0002	25	0.0006
Unknown4/Arabidopsis-Promoters/Homer	CKTCKTCTTY	1	-0.01253	1	1681	0.1643	6835.5	0.1726
c-Myc(bHLH)/mES-cMyc-ChIP-Seq(GSE11431)/Homer	VVCCACGTGG	1	-0.01211	1	714	0.0698	2993.2	0.0756
BORIS(Zf)/K562-CTCFL-ChIP-Seq(GSE32465)/Homer	CNNBRGCGCCCCCTGSTGGC	1	-0.009881	1	184	0.018	839.9	0.0212
PIF7(bHLH)/col-PIF7-DAP-Seq(GSE60143)/Homer	CCACGTGGNH	1	-0.005617	1	194	0.019	893.1	0.0226
Cbf1(bHLH)/Yeast-Cbf1-ChIP-Seq(GSE29506)/Homer	TCACGTGAYH	1	-0.004357	1	317	0.031	1412.4	0.0357
BZR1(BZR)/col-BZR1-DAP-Seq(GSE60143)/Homer	NNCRCACGTGCG	1	-0.003853	1	84	0.0082	427.8	0.0108
Pax7(Paired,Homeobox)/Myoblast-Pax7-ChIP-Seq(GSE25064)/Homer	TAATCAATTA	1	-0.003675	1	228	0.0223	1045.7	0.0264
At4g18890(BZR)/col-At4g18890-DAP-Seq(GSE60143)/Homer	NDBRCACGTGYR	1	-0.003278	1	170	0.0166	803	0.0203
n-Myc(bHLH)/mES-nMyc-ChIP-Seq(GSE11431)/Homer	VRCCACGTGG	1	-0.002645	1	956	0.0934	4025.5	0.1016
BIM1(bHLH)/colamp-BIM1-DAP-Seq(GSE60143)/Homer	NNNNNNVTCACGTGM	1	-0.001164	1	96	0.0094	497.8	0.0126
Pho4(bHLH)/Yeast-Pho4-ChIP-Seq(GSE29506)/Homer	AAGCACGTGBGD	1	-0.001115	1	203	0.0198	963.6	0.0243
bHLH34(bHLH)/colamp-bHLH34-DAP-Seq(GSE60143)/Homer	HGWGRHWGACACGTG	1	-0.000929	1	294	0.0287	1352.2	0.0341
YY1(Zf)/Promoter/Homer	CAAGATGGCGGC	1	-0.00084	1	45	0.0044	267.6	0.0068
USF1(bHLH)/GM12878-Usf1-ChIP-Seq(GSE32465)/Homer	SGTCACGTGR	1	-0.000796	1	561	0.0548	2463.8	0.0622
TCP3(TCP)/colamp-TCP3-DAP-Seq(GSE60143)/Homer	WGTGGTCCCAAHWWW	1	-0.000557	1	388	0.0379	1757.9	0.0444
NRF(NRF)/Promoter/Homer	STGCGCATGCGC	1	-0.000496	1	64	0.0063	362.9	0.0092
AT3G51470(DBP)/col-AT3G51470-DAP-Seq(GSE60143)/Homer	TTWHGGTGCACC	1	-0.000119	1	2335	0.2282	9651	0.2437
c-Myc(bHLH)/LNCAP-cMyc-ChIP-Seq(Unpublished)/Homer	VCCACGTG	1	-9.7e-05	1	439	0.0429	2010.9	0.0508
At4g36780(BZR)/col-At4g36780-DAP-Seq(GSE60143)/Homer	NNNNNNCACGTGNNN	1	-2.6e-05	1	299	0.0292	1443.3	0.0364
CUX1(Homeobox)/K562-CUX1-ChIP-Seq(GSE92882)/Homer	TATCGATNAN	1	-1.8e-05	1	1466	0.1433	6256.2	0.158
At1g78700(BZR)/col-At1g78700-DAP-Seq(GSE60143)/Homer	NNNNCACGTGNNNNN	1	-4e-06	1	301	0.0294	1483.9	0.0375
Slug(Zf)/Mesoderm-Snai2-ChIP-Seq(GSE61475)/Homer	SNGCACCTGCHS	1	-4e-06	1	860	0.0841	3836.6	0.0969
bHLHE40(bHLH)/HepG2-BHLHE40-ChIP-Seq(GSE31477)/Homer	KCACGTGMCN	1	-1e-06	1	294	0.0287	1473.5	0.0372
Hnf6b(Homeobox)/LNCaP-Hnf6b-ChIP-Seq(GSE106305)/Homer	TATTGAYY	1	0	1	1905	0.1862	8154.9	0.2059
bHLH74(bHLH)/col-bHLH74-DAP-Seq(GSE60143)/Homer	DRATCACGTGAB	1	0	1	200	0.0195	1078.3	0.0272
E2A(bHLH),near_PU.1/Bcell-PU.1-ChIP-Seq(GSE21512)/Homer	NVCACCTGBN	1	0	1	2366	0.2312	10021	0.253
ZEB2(Zf)/SNU398-ZEB2-ChIP-Seq(GSE103048)/Homer	GNMCAGGTGTGC	1	0	1	1556	0.1521	6779.6	0.1712
CTCF(Zf)/CD4+-CTCF-ChIP-Seq(Barski_et_al.)/Homer	AYAGTGCCMYCTRGTGGCCA	1	0	1	93	0.0091	611.4	0.0154
HNF6(Homeobox)/Liver-Hnf6-ChIP-Seq(ERP000394)/Homer	NTATYGATCH	1	0	1	1075	0.1051	4891.3	0.1235
Zelda(Zf)/Embryo-zld-ChIP-Seq(GSE65441)/Homer	KBCTACCTGW	1	0	1	689	0.0673	3345.2	0.0845
Cux2(Homeobox)/Liver-Cux2-ChIP-Seq(GSE35985)/Homer	HNRAATCAAT	1	0	1	847	0.0828	4044	0.1021
ZEB1(Zf)/PDAC-ZEB1-ChIP-Seq(GSE64557)/Homer	VCAGGTRDRY	1	0	1	2793	0.273	12030.9	0.3038
LRF(Zf)/Erythroblasts-ZBTB7A-ChIP-Seq(GSE74977)/Homer	AAGACCCYYN	1	0	1	1715	0.1676	7871.6	0.1987
REM16(ABI3VP1)/col-REM16-DAP-Seq(GSE60143)/Homer	DTTTTTSCCGSMAAA	1	0	1	0	0	1.6	0

## Sheet: Homer_ Dog-OralMel-vs-Dog-IrisM
Complete output from Homer on differential regions in the dog line Dog-OralMel-18249 versus the dog line Dog-IrisMel-14205.
Motif Name	Consensus	P-value	Log P-value	q-value (Benjamini)	# of Target Sequences with Motif(of 46654)	% of Target Sequences with Motif	# of Background Sequences with Motif(of 46461)	% of Background Sequences with Motif
Sox9(HMG)/Limb-SOX9-ChIP-Seq(GSE73225)/Homer	AGGVNCCTTTGT	1e-1662	-3827	0	15326	0.3285	7587.1	0.1633
Sox10(HMG)/SciaticNerve-Sox3-ChIP-Seq(GSE35132)/Homer	CCWTTGTYYB	1e-1434	-3303	0	23304	0.4995	14775.8	0.318
Sox3(HMG)/NPC-Sox3-ChIP-Seq(GSE33059)/Homer	CCWTTGTY	1e-1373	-3163	0	24635	0.528	16168.1	0.348
AP-2gamma(AP2)/MCF7-TFAP2C-ChIP-Seq(GSE21234)/Homer	SCCTSAGGSCAW	1e-1180	-2719	0	13004	0.2787	6794	0.1462
AP-2alpha(AP2)/Hela-AP2alpha-ChIP-Seq(GSE31477)/Homer	ATGCCCTGAGGC	1e-1175	-2708	0	10826	0.232	5187.3	0.1116
Sox4(HMG)/proB-Sox4-ChIP-Seq(GSE50066)/Homer	YCTTTGTTCC	1e-1067	-2459	0	14026	0.3006	7850.8	0.169
Sox15(HMG)/CPA-Sox15-ChIP-Seq(GSE62909)/Homer	RAACAATGGN	1e-1047	-2411	0	17196	0.3686	10510	0.2262
Sox6(HMG)/Myotubes-Sox6-ChIP-Seq(GSE32627)/Homer	CCATTGTTNY	1e-1017	-2343	0	22549	0.4833	15337.9	0.3301
Sox2(HMG)/mES-Sox2-ChIP-Seq(GSE11431)/Homer	BCCATTGTTC	1e-1007	-2319	0	14630	0.3136	8490	0.1827
RUNX(Runt)/HPC7-Runx1-ChIP-Seq(GSE22178)/Homer	SAAACCACAG	1e-844	-1944	0	10151	0.2176	5380.5	0.1158
RUNX1(Runt)/Jurkat-RUNX1-ChIP-Seq(GSE29180)/Homer	AAACCACARM	1e-839	-1933	0	13829	0.2964	8293.5	0.1785
Sox17(HMG)/Endoderm-Sox17-ChIP-Seq(GSE61475)/Homer	CCATTGTTYB	1e-801	-1847	0	11840	0.2538	6792.5	0.1462
RUNX2(Runt)/PCa-RUNX2-ChIP-Seq(GSE33889)/Homer	NWAACCACADNN	1e-793	-1828	0	11581	0.2482	6609	0.1422
RUNX-AML(Runt)/CD4+-PolII-ChIP-Seq(Barski_et_al.)/Homer	GCTGTGGTTW	1e-635	-1464	0	9707	0.2081	5560.8	0.1197
MITF(bHLH)/MastCells-MITF-ChIP-Seq(GSE48085)/Homer	RTCATGTGAC	1e-536	-1236	0	10697	0.2293	6649.1	0.1431
Usf2(bHLH)/C2C12-Usf2-ChIP-Seq(GSE36030)/Homer	GTCACGTGGT	1e-506	-1166	0	4328	0.0928	1923.7	0.0414
SPCH(bHLH)/Seedling-SPCH-ChIP-Seq(GSE57497)/Homer	WNBCACGTGA	1e-415	-957.4	0	10872	0.233	7224.4	0.1555
PIF5ox(bHLH)/Arabidopsis-PIF5ox-ChIP-Seq(GSE35062)/Homer	BCACGTGVDN	1e-370	-853.1	0	11012	0.236	7527	0.162
BIM2(bHLH)/col-BIM2-DAP-Seq(GSE60143)/Homer	NNNNCACGTGNN	1e-363	-836.4	0	9749	0.209	6484.1	0.1395
USF1(bHLH)/GM12878-Usf1-ChIP-Seq(GSE32465)/Homer	SGTCACGTGR	1e-353	-814.4	0	4903	0.1051	2653.6	0.0571
Cbf1(bHLH)/Yeast-Cbf1-ChIP-Seq(GSE29506)/Homer	TCACGTGAYH	1e-352	-811.1	0	3357	0.072	1558.7	0.0335
ETS1(ETS)/Jurkat-ETS1-ChIP-Seq(GSE17954)/Homer	ACAGGAAGTG	1e-343	-790.8	0	11182	0.2397	7789.8	0.1676
PIF4(bHLH)/Seedling-PIF4-ChIP-Seq(GSE35315)/Homer	NNBCACGTGN	1e-326	-752	0	12725	0.2727	9218.2	0.1984
Fli1(ETS)/CD8-FLI-ChIP-Seq(GSE20898)/Homer	NRYTTCCGGH	1e-314	-724.1	0	10969	0.2351	7736.5	0.1665
Etv2(ETS)/ES-ER71-ChIP-Seq(GSE59402)/Homer	NNAYTTCCTGHN	1e-296	-683.8	0	10401	0.2229	7325.4	0.1576
ERG(ETS)/VCaP-ERG-ChIP-Seq(GSE14097)/Homer	ACAGGAAGTG	1e-295	-680.6	0	16389	0.3513	12704	0.2734
GABPA(ETS)/Jurkat-GABPa-ChIP-Seq(GSE17954)/Homer	RACCGGAAGT	1e-287	-662.2	0	8888	0.1905	6071.8	0.1307
ETV1(ETS)/GIST48-ETV1-ChIP-Seq(GSE22441)/Homer	AACCGGAAGT	1e-286	-660.2	0	13322	0.2855	9956.3	0.2143
BMAL1(bHLH)/Liver-Bmal1-ChIP-Seq(GSE39860)/Homer	GNCACGTG	1e-256	-590.2	0	16952	0.3633	13468.4	0.2899
ETV4(ETS)/HepG2-ETV4-ChIP-Seq(ENCODE)/Homer	ACCGGAAGTG	1e-253	-583.3	0	9967	0.2136	7159.5	0.1541
EWS:ERG-fusion(ETS)/CADO_ES1-EWS:ERG-ChIP-Seq(SRA014231)/Homer	ATTTCCTGTN	1e-216	-499.3	0	9605	0.2059	7032.2	0.1513
CLOCK(bHLH)/Liver-Clock-ChIP-Seq(GSE39860)/Homer	GHCACGTG	1e-213	-491	0	5150	0.1104	3279	0.0706
Ets1-distal(ETS)/CD4+-PolII-ChIP-Seq(Barski_et_al.)/Homer	MACAGGAAGT	1e-210	-485.1	0	3949	0.0846	2339.3	0.0503
Elf4(ETS)/BMDM-Elf4-ChIP-Seq(GSE88699)/Homer	ACTTCCKGKT	1e-207	-477.5	0	10197	0.2186	7607.3	0.1637
EWS:FLI1-fusion(ETS)/SK_N_MC-EWS:FLI1-ChIP-Seq(SRA014231)/Homer	VACAGGAAAT	1e-207	-477.3	0	6277	0.1345	4227.1	0.091
TFE3(bHLH)/MEF-TFE3-ChIP-Seq(GSE75757)/Homer	GTCACGTGACYV	1e-196	-452.7	0	1134	0.0243	401.3	0.0086
EHF(ETS)/LoVo-EHF-ChIP-Seq(GSE49402)/Homer	AVCAGGAAGT	1e-193	-446.6	0	13985	0.2997	11126.6	0.2395
ELF3(ETS)/PDAC-ELF3-ChIP-Seq(GSE64557)/Homer	ANCAGGAAGT	1e-187	-431.2	0	8657	0.1855	6363.1	0.1369
Elk1(ETS)/Hela-Elk1-ChIP-Seq(GSE31477)/Homer	HACTTCCGGY	1e-181	-417.9	0	4548	0.0975	2916	0.0628
PR(NR)/T47D-PR-ChIP-Seq(GSE31130)/Homer	VAGRACAKNCTGTBC	1e-177	-407.9	0	20621	0.442	17545.2	0.3776
Elk4(ETS)/Hela-Elk4-ChIP-Seq(GSE31477)/Homer	NRYTTCCGGY	1e-170	-392.7	0	4577	0.0981	2982.8	0.0642
SPDEF(ETS)/VCaP-SPDEF-ChIP-Seq(SRA014231)/Homer	ASWTCCTGBT	1e-162	-373.7	0	10071	0.2159	7770.7	0.1672
ETS:RUNX(ETS,Runt)/Jurkat-RUNX1-ChIP-Seq(GSE17954)/Homer	RCAGGATGTGGT	1e-159	-367.8	0	1201	0.0257	493.2	0.0106
NF1(CTF)/LNCAP-NF1-ChIP-Seq(Unpublished)/Homer	CYTGGCABNSTGCCAR	1e-159	-367.8	0	4058	0.087	2605.5	0.0561
ELF1(ETS)/Jurkat-ELF1-ChIP-Seq(SRA014231)/Homer	AVCCGGAAGT	1e-156	-360.5	0	3998	0.0857	2569.2	0.0553
STAT1(Stat)/HelaS3-STAT1-ChIP-Seq(GSE12782)/Homer	NATTTCCNGGAAAT	1e-154	-355.4	0	4695	0.1006	3147.7	0.0677
PU.1(ETS)/ThioMac-PU.1-ChIP-Seq(GSE21512)/Homer	AGAGGAAGTG	1e-150	-347.4	0	5452	0.1169	3795.2	0.0817
STAT5(Stat)/mCD4+-Stat5-ChIP-Seq(GSE12346)/Homer	RTTTCTNAGAAA	1e-147	-340.6	0	5379	0.1153	3748	0.0807
ETS(ETS)/Promoter/Homer	AACCGGAAGT	1e-145	-335.3	0	2745	0.0588	1621.4	0.0349
SeqBias: CA-repeat	CACACACACA	1e-144	-332.6	0	37834	0.8109	35391.2	0.7617
NPAS(bHLH)/Liver-NPAS-ChIP-Seq(GSE39860)/Homer	NVCACGTG	1e-144	-332	0	14525	0.3113	12006	0.2584
Foxo1(Forkhead)/RAW-Foxo1-ChIP-Seq(Fan_et_al.)/Homer	CTGTTTAC	1e-140	-324.5	0	19062	0.4086	16355.2	0.352
PHA-4(Forkhead)/cElegans-Embryos-PHA4-ChIP-Seq(modEncode)/Homer	KTGTTTGC	1e-127	-293.9	0	29822	0.6392	27167.4	0.5847
AT2G33550(Trihelix)/colamp-AT2G33550-DAP-Seq(GSE60143)/Homer	TTTAAGGGCAYTTTT	1e-125	-289.9	0	25930	0.5558	23255.5	0.5005
ELF5(ETS)/T47D-ELF5-ChIP-Seq(GSE30407)/Homer	ACVAGGAAGT	1e-125	-289.7	0	8057	0.1727	6208.8	0.1336
STAT4(Stat)/CD4-Stat4-ChIP-Seq(GSE22104)/Homer	NYTTCCWGGAAR	1e-125	-288	0	12115	0.2597	9914.3	0.2134
LEF1(HMG)/H1-LEF1-ChIP-Seq(GSE64758)/Homer	CCTTTGATST	1e-121	-278.9	0	9307	0.1995	7367	0.1585
Stat3+il21(Stat)/CD4-Stat3-ChIP-Seq(GSE19198)/Homer	SVYTTCCNGGAARB	1e-121	-278.7	0	7922	0.1698	6120.5	0.1317
HuR(?)/HEK293-HuR-CLIP-Seq(GSE87887)/Homer	BTTTGGTTTG	1e-120	-276.7	0	36104	0.7738	33761.4	0.7266
Stat3(Stat)/mES-Stat3-ChIP-Seq(GSE11431)/Homer	CTTCCGGGAA	1e-116	-268.4	0	5519	0.1183	4034.6	0.0868
MNT(bHLH)/HepG2-MNT-ChIP-Seq(Encode)/Homer	DGCACACGTG	1e-115	-266.2	0	9700	0.2079	7767.8	0.1672
Tlx?(NR)/NPC-H3K4me1-ChIP-Seq(GSE16256)/Homer	CTGGCAGSCTGCCA	1e-111	-255.7	0	3910	0.0838	2695.9	0.058
Max(bHLH)/K562-Max-ChIP-Seq(GSE31477)/Homer	RCCACGTGGYYN	1e-107	-248.3	0	6043	0.1295	4543.9	0.0978
EBF1(EBF)/Near-E2A-ChIP-Seq(GSE21512)/Homer	GTCCCCWGGGGA	1e-105	-242.9	0	9603	0.2058	7760	0.167
MYB73(MYB)/col-MYB73-DAP-Seq(GSE60143)/Homer	NNNNHAACNGHHDHN	1e-103	-238.5	0	21422	0.4591	19031.9	0.4096
FOXK1(Forkhead)/HEK293-FOXK1-ChIP-Seq(GSE51673)/Homer	NVWTGTTTAC	1e-102	-235.9	0	13038	0.2794	10978.4	0.2363
bHLHE40(bHLH)/HepG2-BHLHE40-ChIP-Seq(GSE31477)/Homer	KCACGTGMCN	1e-101	-234.6	0	2516	0.0539	1596.5	0.0344
NPAS2(bHLH)/Liver-NPAS2-ChIP-Seq(GSE39860)/Homer	KCCACGTGAC	1e-100	-232	0	9475	0.2031	7681.4	0.1653
Sp5(Zf)/mES-Sp5.Flag-ChIP-Seq(GSE72989)/Homer	RGKGGGCGGAGC	1e-95	-219.6	0	5839	0.1252	4445.8	0.0957
Hoxa13(Homeobox)/ChickenMSG-Hoxa13.Flag-ChIP-Seq(GSE86088)/Homer	CYHATAAAAN	1e-95	-219.2	0	28340	0.6074	26019.2	0.56
Foxf1(Forkhead)/Lung-Foxf1-ChIP-Seq(GSE77951)/Homer	WWATRTAAACAN	1e-94	-217.8	0	12220	0.2619	10285.7	0.2214
AT1G76870(Trihelix)/col-AT1G76870-DAP-Seq(GSE60143)/Homer	AAAACCRGWW	1e-93	-215.6	0	5141	0.1102	3844.5	0.0827
FoxL2(Forkhead)/Ovary-FoxL2-ChIP-Seq(GSE60858)/Homer	WWTRTAAACAVG	1e-91	-210.8	0	11211	0.2403	9370.5	0.2017
BIM3(bHLH)/col-BIM3-DAP-Seq(GSE60143)/Homer	TWVTCACGTGAB	1e-90	-208.4	0	1113	0.0239	568.8	0.0122
bHLH74(bHLH)/col-bHLH74-DAP-Seq(GSE60143)/Homer	DRATCACGTGAB	1e-89	-206.2	0	1842	0.0395	1112.2	0.0239
FOXA1(Forkhead)/LNCAP-FOXA1-ChIP-Seq(GSE27824)/Homer	WAAGTAAACA	1e-89	-205.9	0	15044	0.3224	13013.9	0.2801
Foxo3(Forkhead)/U2OS-Foxo3-ChIP-Seq(E-MTAB-2701)/Homer	DGTAAACA	1e-87	-202.6	0	9459	0.2027	7777.9	0.1674
KLF14(Zf)/HEK293-KLF14.GFP-ChIP-Seq(GSE58341)/Homer	RGKGGGCGKGGC	1e-87	-201.8	0	10452	0.224	8700.1	0.1872
c-Myc(bHLH)/LNCAP-cMyc-ChIP-Seq(Unpublished)/Homer	VCCACGTG	1e-86	-199.2	0	3193	0.0684	2217.6	0.0477
Pitx1(Homeobox)/Chicken-Pitx1-ChIP-Seq(GSE38910)/Homer	TAATCCCN	1e-86	-198.5	0	35621	0.7635	33607.3	0.7233
TATA-Box(TBP)/Promoter/Homer	CCTTTTAWAGSC	1e-84	-194.4	0	15501	0.3322	13506	0.2907
Fox:Ebox(Forkhead,bHLH)/Panc1-Foxa2-ChIP-Seq(GSE47459)/Homer	NNNVCTGWGYAAACASN	1e-83	-191.8	0	10624	0.2277	8902.9	0.1916
FOXA1(Forkhead)/MCF7-FOXA1-ChIP-Seq(GSE26831)/Homer	WAAGTAAACA	1e-82	-190.9	0	12788	0.2741	10939.3	0.2354
Egr1(Zf)/K562-Egr1-ChIP-Seq(GSE32465)/Homer	TGCGTGGGYG	1e-82	-190.5	0	4536	0.0972	3386.9	0.0729
bHLHE41(bHLH)/proB-Bhlhe41-ChIP-Seq(GSE93764)/Homer	KCACGTGMCN	1e-82	-190.3	0	7811	0.1674	6312.7	0.1359
E-box(bHLH)/Promoter/Homer	SSGGTCACGTGA	1e-80	-184.9	0	732	0.0157	330.9	0.0071
Hoxa11(Homeobox)/ChickenMSG-Hoxa11.Flag-ChIP-Seq(GSE86088)/Homer	TTTTATGGCM	1e-80	-184.5	0	26502	0.568	24356.5	0.5242
FoxD3(forkhead)/ZebrafishEmbryo-Foxd3.biotin-ChIP-seq(GSE106676)/Homer	TGTTTAYTTAGC	1e-80	-184.4	0	10960	0.2349	9248.7	0.199
Hoxd11(Homeobox)/ChickenMSG-Hoxd11.Flag-ChIP-Seq(GSE86088)/Homer	VGCCATAAAA	1e-78	-181.7	0	26525	0.5685	24396	0.525
REF6(Zf)/Arabidopsis-REF6-ChIP-Seq(GSE106942)/Homer	TVCTCTGTTT	1e-78	-180.3	0	6679	0.1432	5321.2	0.1145
Oct4:Sox17(POU,Homeobox,HMG)/F9-Sox17-ChIP-Seq(GSE44553)/Homer	CCATTGTATGCAAAT	1e-78	-180	0	2341	0.0502	1553.3	0.0334
Tcf4(HMG)/Hct116-Tcf4-ChIP-Seq(SRA012054)/Homer	ASATCAAAGGVA	1e-77	-177.5	0	5951	0.1276	4676.7	0.1006
Hoxd13(Homeobox)/ChickenMSG-Hoxd13.Flag-ChIP-Seq(GSE86088)/Homer	NCYAATAAAA	1e-76	-177.2	0	20375	0.4367	18323.8	0.3943
Hoxa9(Homeobox)/ChickenMSG-Hoxa9.Flag-ChIP-Seq(GSE86088)/Homer	RGCAATNAAA	1e-76	-176.2	0	27673	0.5931	25580.9	0.5505
Smad3(MAD)/NPC-Smad3-ChIP-Seq(GSE36673)/Homer	TWGTCTGV	1e-76	-176	0	22189	0.4756	20114.3	0.4329
FOXP1(Forkhead)/H9-FOXP1-ChIP-Seq(GSE31006)/Homer	NYYTGTTTACHN	1e-75	-173.9	0	5563	0.1192	4342	0.0934
n-Myc(bHLH)/mES-nMyc-ChIP-Seq(GSE11431)/Homer	VRCCACGTGG	1e-73	-170.2	0	5527	0.1185	4321.5	0.093
bHLH34(bHLH)/colamp-bHLH34-DAP-Seq(GSE60143)/Homer	HGWGRHWGACACGTG	1e-72	-166	0	2191	0.047	1458.8	0.0314
Tcf7(HMG)/GM12878-TCF7-ChIP-Seq(Encode)/Homer	CTTTGATGTGSB	1e-69	-160.1	0	4370	0.0937	3328.5	0.0716
Hoxd12(Homeobox)/ChickenMSG-Hoxd12.Flag-ChIP-Seq(GSE86088)/Homer	HDGYAATGAAAN	1e-68	-156.7	0	21481	0.4604	19529.5	0.4203
Egr2(Zf)/Thymocytes-Egr2-ChIP-Seq(GSE34254)/Homer	NGCGTGGGCGGR	1e-67	-155.1	0	1041	0.0223	576.4	0.0124
SeqBias: CG bias	SSSSSSSSSS	1e-66	-152.1	0	34429	0.7379	32614.1	0.7019
FOXM1(Forkhead)/MCF7-FOXM1-ChIP-Seq(GSE72977)/Homer	TRTTTACTTW	1e-65	-151	0	12793	0.2742	11140.4	0.2398
Nkx6.1(Homeobox)/Islet-Nkx6.1-ChIP-Seq(GSE40975)/Homer	GKTAATGR	1e-65	-150.9	0	28371	0.6081	26435.7	0.5689
PIF7(bHLH)/col-PIF7-DAP-Seq(GSE60143)/Homer	CCACGTGGNH	1e-65	-150	0	1505	0.0323	937.1	0.0202
GAGA-repeat/SacCer-Promoters/Homer	CTYTCTYTCTCTCTC	1e-65	-149.7	0	35485	0.7606	33723.2	0.7258
EBF2(EBF)/BrownAdipose-EBF2-ChIP-Seq(GSE97114)/Homer	NABTCCCWDGGGAVH	1e-64	-149.5	0	8783	0.1883	7374	0.1587
Hoxd10(Homeobox)/ChickenMSG-Hoxd10.Flag-ChIP-Seq(GSE86088)/Homer	GGCMATGAAA	1e-64	-148.1	0	14433	0.3093	12724	0.2738
At5g62940(C2C2dof)/col-At5g62940-DAP-Seq(GSE60143)/Homer	WHWHHACTTTTT	1e-64	-147.8	0	34956	0.7492	33185.2	0.7142
Bcl6(Zf)/Liver-Bcl6-ChIP-Seq(GSE31578)/Homer	NNNCTTTCCAGGAAA	1e-63	-146.9	0	14944	0.3203	13221.9	0.2845
BIM1(bHLH)/colamp-BIM1-DAP-Seq(GSE60143)/Homer	NNNNNNVTCACGTGM	1e-63	-146.7	0	908	0.0195	489	0.0105
AtHB32(ZFHD)/col200-AtHB32-DAP-Seq(GSE60143)/Homer	CGAATTAT	1e-63	-145.9	0	16733	0.3586	14954.2	0.3218
MYB81(MYB)/col-MYB81-DAP-Seq(GSE60143)/Homer	NWAACSGWTWNN	1e-63	-145.4	0	16482	0.3533	14714.3	0.3167
ARF2(ARF)/col-ARF2-DAP-Seq(GSE60143)/Homer	TTGTCGGMWN	1e-62	-143.8	0	20733	0.4444	18872.4	0.4062
CDX4(Homeobox)/ZebrafishEmbryos-Cdx4.Myc-ChIP-Seq(GSE48254)/Homer	NGYCATAAAWCH	1e-61	-142.7	0	12114	0.2596	10538.9	0.2268
Mef2b(MADS)/HEK293-Mef2b.V5-ChIP-Seq(GSE67450)/Homer	GCTATTTTTGGM	1e-61	-142.1	0	11095	0.2378	9576.9	0.2061
CRX(Homeobox)/Retina-Crx-ChIP-Seq(GSE20012)/Homer	GCTAATCC	1e-61	-141.9	0	22794	0.4886	20918.8	0.4502
PABPC1(?)/MEL-PABC1-CLIP-Seq(GSE69755)/Homer	HAATAAAGNN	1e-61	-141.3	0	24111	0.5168	22229.1	0.4784
STAT6(Stat)/Macrophage-Stat6-ChIP-Seq(GSE38377)/Homer	TTCCKNAGAA	1e-60	-138.9	0	7720	0.1655	6435.2	0.1385
ERF15(AP2EREBP)/colamp-ERF15-DAP-Seq(GSE60143)/Homer	WDHAGCMGCCAT	1e-59	-136	0	11423	0.2448	9918.1	0.2134
Mef2c(MADS)/GM12878-Mef2c-ChIP-Seq(GSE32465)/Homer	DCYAAAAATAGM	1e-58	-133.7	0	6487	0.139	5323.4	0.1146
WT1(Zf)/Kidney-WT1-ChIP-Seq(GSE90016)/Homer	MCTCCCMCRCAB	1e-55	-128.8	0	4417	0.0947	3470.5	0.0747
IBL1(bHLH)/Seedling-IBL1-ChIP-Seq(GSE51120)/Homer	CACGTGCC	1e-55	-127.9	0	11321	0.2426	9865.1	0.2123
At4g36780(BZR)/col-At4g36780-DAP-Seq(GSE60143)/Homer	NNNNNNCACGTGNNN	1e-55	-126.9	0	2193	0.047	1542.5	0.0332
E-box/Arabidopsis-Promoters/Homer	GCCACGTG	1e-54	-126.4	0	3047	0.0653	2272	0.0489
Nkx3.1(Homeobox)/LNCaP-Nkx3.1-ChIP-Seq(GSE28264)/Homer	AAGCACTTAA	1e-54	-126	0	20520	0.4398	18778.3	0.4041
At3g24120(G2like)/col-At3g24120-DAP-Seq(GSE60143)/Homer	NWWAGMATMW	1e-53	-122.8	0	31437	0.6738	29726.5	0.6397
STAT6(Stat)/CD4-Stat6-ChIP-Seq(GSE22104)/Homer	ABTTCYYRRGAA	1e-53	-122.3	0	7654	0.1641	6449.4	0.1388
WUS1(Homeobox)/colamp-WUS1-DAP-Seq(GSE60143)/Homer	CAWTCATTCA	1e-52	-120.4	0	5779	0.1239	4731.9	0.1018
AT3G25990(Trihelix)/colamp-AT3G25990-DAP-Seq(GSE60143)/Homer	TTAACCATAG	1e-51	-119.6	0	8088	0.1734	6866.9	0.1478
Bcl11a(Zf)/HSPC-BCL11A-ChIP-Seq(GSE104676)/Homer	TYTGACCASWRG	1e-51	-119.4	0	6659	0.1427	5542	0.1193
Hoxa10(Homeobox)/ChickenMSG-Hoxa10.Flag-ChIP-Seq(GSE86088)/Homer	GGYAATGAAA	1e-51	-117.7	0	7842	0.1681	6646.9	0.143
Mef2d(MADS)/Retina-Mef2d-ChIP-Seq(GSE61391)/Homer	GCTATTTTTAGC	1e-50	-117.1	0	2953	0.0633	2217.9	0.0477
Zfp281(Zf)/ES-Zfp281-ChIP-Seq(GSE81042)/Homer	CCCCTCCCCCAC	1e-50	-115.9	0	1686	0.0361	1145.1	0.0246
Pit1(Homeobox)/GCrat-Pit1-ChIP-Seq(GSE58009)/Homer	ATGMATATDC	1e-50	-115.2	0	13277	0.2846	11806.2	0.2541
Ap4(bHLH)/AML-Tfap4-ChIP-Seq(GSE45738)/Homer	NAHCAGCTGD	1e-49	-114	0	9678	0.2074	8386.5	0.1805
dof45(C2C2dof)/col-dof45-DAP-Seq(GSE60143)/Homer	NVAWAAAGTN	1e-49	-112.9	0	30028	0.6436	28363.3	0.6104
Foxa2(Forkhead)/Liver-Foxa2-ChIP-Seq(GSE25694)/Homer	CYTGTTTACWYW	1e-48	-112.7	0	9505	0.2037	8230.5	0.1771
AR-halfsite(NR)/LNCaP-AR-ChIP-Seq(GSE27824)/Homer	CCAGGAACAG	1e-48	-112.4	0	28134	0.603	26453.7	0.5693
Rbpj1(?)/Panc1-Rbpj1-ChIP-Seq(GSE47459)/Homer	HTTTCCCASG	1e-47	-109.5	0	14019	0.3005	12556.7	0.2702
PU.1-IRF(ETS:IRF)/Bcell-PU.1-ChIP-Seq(GSE21512)/Homer	MGGAAGTGAAAC	1e-46	-108.1	0	13560	0.2906	12123.3	0.2609
FOXK2(Forkhead)/U2OS-FOXK2-ChIP-Seq(E-MTAB-2204)/Homer	SCHTGTTTACAT	1e-46	-107.3	0	7491	0.1606	6370.6	0.1371
IRF4(IRF)/GM12878-IRF4-ChIP-Seq(GSE32465)/Homer	ACTGAAACCA	1e-46	-106.8	0	5127	0.1099	4193.5	0.0902
GSC(Homeobox)/FrogEmbryos-GSC-ChIP-Seq(DRA000576)/Homer	RGGATTAR	1e-45	-105.8	0	13132	0.2815	11726.9	0.2524
SeqBias: GA-repeat	GAGAGAGAGA	1e-45	-105.7	0	42279	0.9062	41155.3	0.8857
AT5G45580(G2like)/colamp-AT5G45580-DAP-Seq(GSE60143)/Homer	ADRGAATCTH	1e-45	-104.9	0	19358	0.4149	17783.3	0.3827
At1g78700(BZR)/col-At1g78700-DAP-Seq(GSE60143)/Homer	NNNNCACGTGNNNNN	1e-45	-104.4	0	2153	0.0461	1563.4	0.0336
PAX3:FKHR-fusion(Paired,Homeobox)/Rh4-PAX3:FKHR-ChIP-Seq(GSE19063)/Homer	ACCRTGACTAATTNN	1e-45	-103.7	0	2762	0.0592	2090.4	0.045
Mef2a(MADS)/HL1-Mef2a.biotin-ChIP-Seq(GSE21529)/Homer	CYAAAAATAG	1e-44	-103.1	0	5893	0.1263	4910.9	0.1057
MYB101(MYB)/colamp-MYB101-DAP-Seq(GSE60143)/Homer	TAACNRMY	1e-44	-103	0	19041	0.4081	17486.8	0.3763
HLF(bZIP)/HSC-HLF.Flag-ChIP-Seq(GSE69817)/Homer	RTTATGYAAB	1e-44	-101.9	0	10058	0.2156	8814.2	0.1897
MYB33(MYB)/col-MYB33-DAP-Seq(GSE60143)/Homer	DDTYNGTTAN	1e-44	-101.6	0	19475	0.4174	17922.8	0.3857
Rfx6(HTH)/Min6b1-Rfx6.HA-ChIP-Seq(GSE62844)/Homer	TGTTKCCTAGCAACM	1e-43	-101.1	0	8711	0.1867	7546.4	0.1624
Nanog(Homeobox)/mES-Nanog-ChIP-Seq(GSE11724)/Homer	RGCCATTAAC	1e-43	-99.45	0	34134	0.7316	32646.2	0.7026
bcd(Homeobox)/Embryo-Bcd-ChIP-Seq(GSE86966)/Homer	VNNGGATTADNN	1e-43	-99.2	0	12100	0.2593	10778.6	0.232
AREB3(bZIP)/col-AREB3-DAP-Seq(GSE60143)/Homer	NKGMCACGTGDCMNN	1e-42	-98.64	0	1950	0.0418	1405.5	0.0302
HOXB13(Homeobox)/ProstateTumor-HOXB13-ChIP-Seq(GSE56288)/Homer	TTTTATKRGG	1e-42	-98.09	0	13387	0.2869	12022.6	0.2587
bZIP52(bZIP)/colamp-bZIP52-DAP-Seq(GSE60143)/Homer	NDNHCAGCTGTCANN	1e-42	-97.11	0	12533	0.2686	11207	0.2412
MYB(HTH)/ERMYB-Myb-ChIPSeq(GSE22095)/Homer	GGCVGTTR	1e-41	-96.19	0	15782	0.3383	14354	0.3089
IDD4(C2H2)/col-IDD4-DAP-Seq(GSE60143)/Homer	TTTGTCTTTWTB	1e-41	-95.1	0	12020	0.2576	10728.9	0.2309
Pho2(bHLH)/Yeast-Pho2-ChIP-Seq(GSE29506)/Homer	CCCACGTGCT	1e-41	-95.08	0	2591	0.0555	1967.1	0.0423
HOXD13(Homeobox)/Chicken-Hoxd13-ChIP-Seq(GSE38910)/Homer	NCYAATAAAA	1e-41	-94.71	0	14599	0.3129	13216.2	0.2844
SCL(bHLH)/HPC7-Scl-ChIP-Seq(GSE13511)/Homer	AVCAGCTG	1e-40	-93.81	0	30446	0.6526	28928.4	0.6226
PGR(NR)/EndoStromal-PGR-ChIP-Seq(GSE69539)/Homer	AAGAACATWHTGTTC	1e-40	-93.44	0	2953	0.0633	2290.4	0.0493
Lhx3(Homeobox)/Neuron-Lhx3-ChIP-Seq(GSE31456)/Homer	ADBTAATTAR	1e-40	-93.07	0	19946	0.4275	18451	0.3971
MYB88(MYB)/col-MYB88-DAP-Seq(GSE60143)/Homer	HNACGCTCCT	1e-40	-92.99	0	10098	0.2164	8906.9	0.1917
Isl1(Homeobox)/Neuron-Isl1-ChIP-Seq(GSE31456)/Homer	CTAATKGV	1e-40	-92.88	0	20659	0.4428	19154.7	0.4122
ANAC045(NAC)/col-ANAC045-DAP-Seq(GSE60143)/Homer	DNCKTVNNNNNNAMG	1e-39	-91.97	0	16259	0.3485	14848.4	0.3196
MYB70(MYB)/col-MYB70-DAP-Seq(GSE60143)/Homer	WTAACNGTTA	1e-39	-91.96	0	16456	0.3527	15040.9	0.3237
ZFX(Zf)/mES-Zfx-ChIP-Seq(GSE11431)/Homer	AGGCCTRG	1e-39	-91.01	0	9582	0.2054	8428.2	0.1814
KANADI1(Myb)/Seedling-KAN1-ChIP-Seq(GSE48081)/Homer	ARGAATAWWN	1e-38	-89.8	0	16039	0.3438	14650.8	0.3153
NF1-halfsite(CTF)/LNCaP-NF1-ChIP-Seq(Unpublished)/Homer	YTGCCAAG	1e-38	-89.22	0	15252	0.3269	13889	0.2989
bZIP28(bZIP)/col-bZIP28-DAP-Seq(GSE60143)/Homer	TGCCACGTSABH	1e-38	-88.57	0	1677	0.0359	1199.6	0.0258
IRF8(IRF)/BMDM-IRF8-ChIP-Seq(GSE77884)/Homer	GRAASTGAAAST	1e-38	-88.43	0	3784	0.0811	3050.5	0.0657
At2g01060(G2like)/colamp-At2g01060-DAP-Seq(GSE60143)/Homer	AGATKCBNWW	1e-38	-87.84	0	31027	0.665	29564.2	0.6363
HOXA9(Homeobox)/HSC-Hoxa9-ChIP-Seq(GSE33509)/Homer	GGCCATAAATCA	1e-36	-85.17	0	8678	0.186	7607.3	0.1637
SPL15(SBP)/colamp-SPL15-DAP-Seq(GSE60143)/Homer	WDWMMGTACADW	1e-36	-85	0	12451	0.2669	11211.9	0.2413
SeqBias: A/T bias	WWWWWWWWWW	1e-36	-84.08	0	45681	0.9791	45051.4	0.9696
Unknown(Homeobox)/Limb-p300-ChIP-Seq/Homer	SSCMATWAAA	1e-36	-83.84	0	8551	0.1833	7495.4	0.1613
Otx2(Homeobox)/EpiLC-Otx2-ChIP-Seq(GSE56098)/Homer	NYTAATCCYB	1e-35	-81.92	0	8811	0.1889	7753.4	0.1669
SPL1(SBP)/colamp-SPL1-DAP-Seq(GSE60143)/Homer	HYGTACDTWH	1e-35	-81.2	0	15970	0.3423	14649.4	0.3153
Klf9(Zf)/GBM-Klf9-ChIP-Seq(GSE62211)/Homer	GCCACRCCCACY	1e-35	-81.01	0	1900	0.0407	1409.7	0.0303
Foxa3(Forkhead)/Liver-Foxa3-ChIP-Seq(GSE77670)/Homer	BSNTGTTTACWYWGN	1e-35	-80.87	0	4161	0.0892	3423.6	0.0737
STZ(C2H2)/colamp-STZ-DAP-Seq(GSE60143)/Homer	HNBTCACT	1e-35	-80.83	0	39937	0.856	38798.8	0.835
OBP3(C2C2dof)/col-OBP3-DAP-Seq(GSE60143)/Homer	NYWACTTTTT	1e-35	-80.66	0	32165	0.6894	30778.6	0.6624
GT3a(Trihelix)/col-GT3a-DAP-Seq(GSE60143)/Homer	WNACACGTGTYWWAW	1e-34	-80.46	0	1735	0.0372	1269.4	0.0273
AT1G47655(C2C2dof)/colamp-AT1G47655-DAP-Seq(GSE60143)/Homer	YHACTTTTTS	1e-34	-80.12	0	34655	0.7428	33325.9	0.7172
Barx1(Homeobox)/Stomach-Barx1.3xFlag-ChIP-Seq(GSE69483)/Homer	AAACMATTAN	1e-34	-79.26	0	7143	0.1531	6195.1	0.1333
BMYB(HTH)/Hela-BMYB-ChIP-Seq(GSE27030)/Homer	NHAACBGYYV	1e-34	-79.05	0	14070	0.3016	12819.4	0.2759
Erra(NR)/HepG2-Erra-ChIP-Seq(GSE31477)/Homer	CAAAGGTCAG	1e-34	-78.9	0	16309	0.3496	14998.1	0.3228
bZIP3(bZIP)/col-bZIP3-DAP-Seq(GSE60143)/Homer	DWKNHSACGTGGCAD	1e-34	-78.43	0	3867	0.0829	3166.6	0.0681
ZNF416(Zf)/HEK293-ZNF416.GFP-ChIP-Seq(GSE58341)/Homer	WDNCTGGGCA	1e-34	-78.33	0	10257	0.2198	9153.4	0.197
MYB65(MYB)/colamp-MYB65-DAP-Seq(GSE60143)/Homer	RACNGTTA	1e-33	-77.89	0	11868	0.2544	10702	0.2303
Cdx2(Homeobox)/mES-Cdx2-ChIP-Seq(GSE14586)/Homer	GYMATAAAAH	1e-33	-77.62	0	9659	0.207	8587.6	0.1848
bZIP53(bZIP)/colamp-bZIP53-DAP-Seq(GSE60143)/Homer	NDNHSACGTGKMNNN	1e-33	-77.31	0	2016	0.0432	1520.6	0.0327
MYB77(MYB)/col-MYB77-DAP-Seq(GSE60143)/Homer	NYAACBGYMC	1e-33	-76.85	0	11595	0.2485	10446.9	0.2248
TATA-box/SacCer-Promoters/Homer	BBHWTATATA	1e-32	-75.61	0	7217	0.1547	6286.1	0.1353
Foxh1(Forkhead)/hESC-FOXH1-ChIP-Seq(GSE29422)/Homer	NNTGTGGATTSS	1e-32	-75.61	0	6884	0.1475	5973.7	0.1286
GBF6(bZIP)/colamp-GBF6-DAP-Seq(GSE60143)/Homer	WWTGMCACGTCABCW	1e-32	-75.54	0	1434	0.0307	1026.3	0.0221
THRb(NR)/Liver-NR1A2-ChIP-Seq(GSE52613)/Homer	TRAGGTCA	1e-32	-75.35	0	28694	0.615	27311.8	0.5878
HY5(bZIP)/colamp-HY5-DAP-Seq(GSE60143)/Homer	RRTSACGTSD	1e-32	-73.96	0	4762	0.1021	4006.9	0.0862
At5g04390(C2H2)/col200-At5g04390-DAP-Seq(GSE60143)/Homer	AGTGANDN	1e-31	-72.96	0	39531	0.8473	38425.2	0.827
SPL11(SBP)/col100-SPL11-DAP-Seq(GSE60143)/Homer	YTGTACTTBH	1e-31	-72.61	0	6763	0.145	5877.6	0.1265
Zac1(Zf)/Neuro2A-Plagl1-ChIP-Seq(GSE75942)/Homer	HAWGRGGCCM	1e-31	-72.46	0	19667	0.4215	18346.3	0.3948
E-box/Drosophila-Promoters/Homer	AACAGCTGTTHN	1e-30	-71.09	0	2203	0.0472	1703.9	0.0367
GRE(NR),IR3/RAW264.7-GRE-ChIP-Seq(Unpublished)/Homer	VAGRACAKWCTGTYC	1e-30	-70.42	0	2446	0.0524	1920.8	0.0413
caudal(Homeobox)/Drosophila-Embryos-ChIP-Chip(modEncode)/Homer	GGYCATAAAW	1e-30	-70.26	0	10471	0.2244	9415.8	0.2026
IDD5(C2H2)/colamp-IDD5-DAP-Seq(GSE60143)/Homer	TTTTGTCTTTTTBTK	1e-30	-70.12	0	9835	0.2108	8807.9	0.1896
LXH9(Homeobox)/Hct116-LXH9.V5-ChIP-Seq(GSE116822)/Homer	NGCTAATTAG	1e-30	-69.68	0	16898	0.3622	15651.6	0.3368
ABF2(bZIP)/col-ABF2-DAP-Seq(GSE60143)/Homer	KGMCACGTGDCMHHH	1e-30	-69.66	0	1387	0.0297	1001	0.0215
SeqBias: TA-repeat	TATATATATA	1e-30	-69.58	0	32163	0.6894	30870.6	0.6644
AMYB(HTH)/Testes-AMYB-ChIP-Seq(GSE44588)/Homer	TGGCAGTTGG	1e-30	-69.17	0	13822	0.2963	12657.8	0.2724
ZNF711(Zf)/SHSY5Y-ZNF711-ChIP-Seq(GSE20673)/Homer	AGGCCTAG	1e-29	-68.46	0	11872	0.2545	10776.5	0.2319
bZIP48(bZIP)/colamp-bZIP48-DAP-Seq(GSE60143)/Homer	DDWWKVTSACGTGGC	1e-29	-68.37	0	2503	0.0536	1978.4	0.0426
GBF5(bZIP)/colamp-GBF5-DAP-Seq(GSE60143)/Homer	WKNWSACGTGGCAWN	1e-29	-68.22	0	2234	0.0479	1740.6	0.0375
AT4G37180(G2like)/col-AT4G37180-DAP-Seq(GSE60143)/Homer	AGAATCTTNN	1e-29	-67.55	0	14961	0.3207	13779	0.2965
SMB(NAC)/colamp-SMB-DAP-Seq(GSE60143)/Homer	CTTVNNNNDBAAGHW	1e-29	-67.43	0	8287	0.1776	7350.2	0.1582
EGL-5(Homeobox)/cElegans-L3-EGL5-ChIP-Seq(modEncode)/Homer	ATTTAATGGG	1e-29	-67.4	0	17811	0.3818	16566.8	0.3565
IRF3(IRF)/BMDM-Irf3-ChIP-Seq(GSE67343)/Homer	AGTTTCAKTTTC	1e-29	-67.09	0	4264	0.0914	3581	0.0771
NFIL3(bZIP)/HepG2-NFIL3-ChIP-Seq(Encode)/Homer	VTTACGTAAYNNNNN	1e-28	-66.32	0	7427	0.1592	6542.5	0.1408
VND6(NAC)/col-VND6-DAP-Seq(GSE60143)/Homer	DCTTNHTTTTYAMGY	1e-28	-66.3	0	9256	0.1984	8282	0.1782
ISRE(IRF)/ThioMac-LPS-Expression(GSE23622)/Homer	AGTTTCASTTTC	1e-28	-66.12	0	768	0.0165	497.5	0.0107
KLF3(Zf)/MEF-Klf3-ChIP-Seq(GSE44748)/Homer	NRGCCCCRCCCHBNN	1e-28	-65.97	0	2197	0.0471	1715.6	0.0369
SGR5(C2H2)/colamp-SGR5-DAP-Seq(GSE60143)/Homer	TTTGTCTTTTTT	1e-28	-65.81	0	8472	0.1816	7537.5	0.1622
ANAC070(NAC)/colamp-ANAC070-DAP-Seq(GSE60143)/Homer	CTTRHDNHNBAAGHW	1e-28	-65.52	0	11049	0.2368	10006.4	0.2153
VND2(NAC)/col-VND2-DAP-Seq(GSE60143)/Homer	DNCKTNNNNNNNAAG	1e-28	-64.68	0	8161	0.1749	7249.5	0.156
ERF13(AP2EREBP)/colamp-ERF13-DAP-Seq(GSE60143)/Homer	TYAGCCGCCATT	1e-27	-64.34	0	4298	0.0921	3626.7	0.0781
Initiator/Drosophila-Promoters/Homer	NTCAGTYG	1e-27	-64.19	0	20481	0.439	19225.1	0.4137
FEA4(bZIP)/Corn-FEA4-ChIP-Seq(GSE61954)/Homer	TGACGTCACS	1e-27	-64.02	0	8112	0.1739	7207.6	0.1551
OCT:OCT-short(POU,Homeobox)/NPC-OCT6-ChIP-Seq(GSE43916)/Homer	ATGCATWATGCATRW	1e-27	-63.93	0	9843	0.211	8860.6	0.1907
Sp2(Zf)/HEK293-Sp2.eGFP-ChIP-Seq(Encode)/Homer	YGGCCCCGCCCC	1e-27	-63.79	0	8226	0.1763	7317.9	0.1575
KLF5(Zf)/LoVo-KLF5-ChIP-Seq(GSE49402)/Homer	DGGGYGKGGC	1e-27	-63.1	0	6736	0.1444	5910.2	0.1272
AT5G60130(ABI3VP1)/col-AT5G60130-DAP-Seq(GSE60143)/Homer	WTTYTAAGVAAA	1e-27	-63.07	0	24251	0.5198	22976.5	0.4945
AT1G49560(G2like)/colamp-AT1G49560-DAP-Seq(GSE60143)/Homer	GAWTCTNWDA	1e-27	-62.46	0	15176	0.3253	14032.4	0.302
Lhx2(Homeobox)/HFSC-Lhx2-ChIP-Seq(GSE48068)/Homer	TAATTAGN	1e-27	-62.21	0	13673	0.2931	12572	0.2706
LBD18(LOBAS2)/colamp-LBD18-DAP-Seq(GSE60143)/Homer	CKGAWWTTCHGS	1e-26	-62.14	0	22507	0.4824	21251.6	0.4574
KAN2(G2like)/colamp-KAN2-DAP-Seq(GSE60143)/Homer	ATATTCTY	1e-26	-62.04	0	17498	0.375	16308.2	0.351
OBP1(C2C2dof)/col-OBP1-DAP-Seq(GSE60143)/Homer	NHHACTTTWT	1e-26	-61.72	0	31478	0.6747	30247.5	0.651
At3g60580(C2H2)/col-At3g60580-DAP-Seq(GSE60143)/Homer	WTTYTACT	1e-26	-61.69	0	39027	0.8365	37982.6	0.8174
SpiB(ETS)/OCILY3-SPIB-ChIP-Seq(GSE56857)/Homer	AAAGRGGAAGTG	1e-26	-60.72	0	2599	0.0557	2094	0.0451
RAP211(AP2EREBP)/colamp-RAP211-DAP-Seq(GSE60143)/Homer	RGCCGGCYWW	1e-26	-60.65	0	10042	0.2152	9077	0.1953
ATHB33(ZFHD)/col-ATHB33-DAP-Seq(GSE60143)/Homer	NGTRATTAAK	1e-26	-60.22	0	16108	0.3453	14964	0.322
At3g12730(G2like)/colamp-At3g12730-DAP-Seq(GSE60143)/Homer	AAGATTCT	1e-25	-59.36	0	17739	0.3802	16570.7	0.3566
Sp1(Zf)/Promoter/Homer	GGCCCCGCCCCC	1e-25	-58.99	0	781	0.0167	521.8	0.0112
IRF2(IRF)/Erythroblas-IRF2-ChIP-Seq(GSE36985)/Homer	GAAASYGAAASY	1e-25	-58.73	0	1203	0.0258	873.3	0.0188
Maz(Zf)/HepG2-Maz-ChIP-Seq(GSE31477)/Homer	GGGGGGGG	1e-25	-57.59	0	8496	0.1821	7619.2	0.164
Smad4(MAD)/ESC-SMAD4-ChIP-Seq(GSE29422)/Homer	VBSYGTCTGG	1e-24	-57.5	0	11209	0.2402	10225.6	0.2201
AT2G38300(G2like)/col-AT2G38300-DAP-Seq(GSE60143)/Homer	ADRGAATGTT	1e-24	-57.13	0	18759	0.4021	17595.2	0.3787
AT2G40260(G2like)/colamp-AT2G40260-DAP-Seq(GSE60143)/Homer	WAAAYATTCTTT	1e-24	-56.5	0	21284	0.4562	20096	0.4325
Lhx1(Homeobox)/EmbryoCarcinoma-Lhx1-ChIP-Seq(GSE70957)/Homer	NNYTAATTAR	1e-24	-55.97	0	14624	0.3134	13553.3	0.2917
KLF6(Zf)/PDAC-KLF6-ChIP-Seq(GSE64557)/Homer	MKGGGYGTGGCC	1e-23	-54.93	0	5555	0.1191	4850.8	0.1044
AT5G25475(ABI3VP1)/col-AT5G25475-DAP-Seq(GSE60143)/Homer	RNNRNCAAGCADNDB	1e-23	-54.86	0	10592	0.227	9652.9	0.2077
AZF1(C2H2)/colamp-AZF1-DAP-Seq(GSE60143)/Homer	DKSWCACT	1e-23	-54.55	0	36952	0.792	35897.9	0.7726
c-Myc(bHLH)/mES-cMyc-ChIP-Seq(GSE11431)/Homer	VVCCACGTGG	1e-23	-54.29	0	3813	0.0817	3230.6	0.0695
ATAF1(NAC)/col-ATAF1-DAP-Seq(GSE60143)/Homer	YACGTMAY	1e-23	-53.99	0	12768	0.2737	11765.6	0.2532
Gfi1b(Zf)/HPC7-Gfi1b-ChIP-Seq(GSE22178)/Homer	MAATCACTGC	1e-23	-53.8	0	6361	0.1363	5617.7	0.1209
TBP3(MYBrelated)/col-TBP3-DAP-Seq(GSE60143)/Homer	VYTAGGGCAN	1e-23	-53.7	0	7341	0.1573	6547.3	0.1409
GATA15(C2C2gata)/col-GATA15-DAP-Seq(GSE60143)/Homer	KATGATCA	1e-23	-53.65	0	13053	0.2798	12045.8	0.2592
PU.1:IRF8(ETS:IRF)/pDC-Irf8-ChIP-Seq(GSE66899)/Homer	GGAAGTGAAAST	1e-23	-53.57	0	2309	0.0495	1861.2	0.0401
RBFox2(?)/Heart-RBFox2-CLIP-Seq(GSE57926)/Homer	TGCATGCA	1e-23	-53.32	0	17482	0.3747	16377.9	0.3525
Hoxc9(Homeobox)/Ainv15-Hoxc9-ChIP-Seq(GSE21812)/Homer	GGCCATAAATCA	1e-22	-52.91	0	6702	0.1436	5947	0.128
IRF1(IRF)/PBMC-IRF1-ChIP-Seq(GSE43036)/Homer	GAAAGTGAAAGT	1e-22	-52.55	0	1763	0.0378	1378.1	0.0297
WRKY25(WRKY)/colamp-WRKY25-DAP-Seq(GSE60143)/Homer	NNNNHRGTCAAMNNN	1e-22	-51.86	0	10054	0.2155	9159.1	0.1971
Adof1(C2C2dof)/col-Adof1-DAP-Seq(GSE60143)/Homer	NRWAAAGYDV	1e-22	-51.69	0	30144	0.6461	28999.3	0.6241
PRDM1(Zf)/Hela-PRDM1-ChIP-Seq(GSE31477)/Homer	ACTTTCACTTTC	1e-22	-51.07	0	6339	0.1359	5615.6	0.1209
NTM1(NAC)/col-NTM1-DAP-Seq(GSE60143)/Homer	ACTTRTARAASAAGT	1e-21	-50.13	0	4907	0.1052	4272.4	0.0919
SPL9(SBP)/colamp-SPL9-DAP-Seq(GSE60143)/Homer	BTGTACTT	1e-21	-49.86	0	17287	0.3705	16221.7	0.3491
ABI5(bZIP)/col-ABI5-DAP-Seq(GSE60143)/Homer	GCCACGTG	1e-21	-49.8	0	2345	0.0503	1909.9	0.0411
Smad2(MAD)/ES-SMAD2-ChIP-Seq(GSE29422)/Homer	CTGTCTGG	1e-21	-49.7	0	11301	0.2422	10382.8	0.2234
Nkx2.5(Homeobox)/HL1-Nkx2.5.biotin-ChIP-Seq(GSE21529)/Homer	RRSCACTYAA	1e-21	-49.24	0	18930	0.4057	17845.1	0.384
WRKY18(WRKY)/col-WRKY18-DAP-Seq(GSE60143)/Homer	NNNTTGACYWNNNNN	1e-21	-48.99	0	13704	0.2937	12723.3	0.2738
At2g33710(AP2EREBP)/colamp-At2g33710-DAP-Seq(GSE60143)/Homer	WTKGCGGCKR	1e-21	-48.95	0	6299	0.135	5593	0.1204
AT5G02460(C2C2dof)/col-AT5G02460-DAP-Seq(GSE60143)/Homer	CHCCTTTT	1e-21	-48.79	0	25189	0.5399	24060.6	0.5178
VND1(NAC)/col-VND1-DAP-Seq(GSE60143)/Homer	CTTRWDNHWYAAGYW	1e-21	-48.56	0	7350	0.1575	6594.3	0.1419
IRF:BATF(IRF:bZIP)/pDC-Irf8-ChIP-Seq(GSE66899)/Homer	CTTTCANTATGACTV	1e-20	-48.25	0	1669	0.0358	1310.2	0.0282
bZIP68(bZIP)/col-bZIP68-DAP-Seq(GSE60143)/Homer	WGCCACGTGK	1e-20	-48.22	0	2049	0.0439	1649.3	0.0355
At5g08750(C3H)/col-At5g08750-DAP-Seq(GSE60143)/Homer	NWDTTGCGGCTR	1e-20	-47.98	0	2385	0.0511	1953.6	0.042
Atf4(bZIP)/MEF-Atf4-ChIP-Seq(GSE35681)/Homer	MTGATGCAAT	1e-20	-47.96	0	3246	0.0696	2740.1	0.059
Rfx5(HTH)/GM12878-Rfx5-ChIP-Seq(GSE31477)/Homer	SCCTAGCAACAG	1e-20	-47.87	0	2564	0.055	2116.5	0.0455
NST1(NAC)/colamp-NST1-DAP-Seq(GSE60143)/Homer	WRCTTRWWNWWYAAG	1e-20	-47.81	0	8759	0.1877	7948.3	0.1711
ABF1(bZIP)/Arabidopsis-ABF1-ChIP-Seq(GSE80564)/Homer	CACGTGGC	1e-20	-47.8	0	5582	0.1196	4922.5	0.1059
ATHB25(ZFHD)/colamp-ATHB25-DAP-Seq(GSE60143)/Homer	TAATTAVB	1e-20	-47.19	0	14446	0.3096	13465.5	0.2898
NLP7(RWPRK)/col-NLP7-DAP-Seq(GSE60143)/Homer	TGRCCYTTCR	1e-20	-47.19	0	16792	0.3599	15763.9	0.3393
Pho4(bHLH)/Yeast-Pho4-ChIP-Seq(GSE29506)/Homer	AAGCACGTGBGD	1e-20	-47.06	0	1369	0.0293	1050.3	0.0226
ANAC071(NAC)/col-ANAC071-DAP-Seq(GSE60143)/Homer	DNCKTNDNNNHNAAG	1e-20	-46.12	0	7305	0.1566	6570.6	0.1414
Dlx3(Homeobox)/Kerainocytes-Dlx3-ChIP-Seq(GSE89884)/Homer	NDGTAATTAC	1e-19	-45.66	0	9342	0.2002	8527.8	0.1835
bZIP:IRF(bZIP,IRF)/Th17-BatF-ChIP-Seq(GSE39756)/Homer	NAGTTTCABTHTGACTNW	1e-19	-45.38	0	5255	0.1126	4630.5	0.0997
PCF/Arabidopsis-Promoters/Homer	NNWWWTGGGCYTDDN	1e-19	-44.86	0	2774	0.0595	2322.7	0.05
Znf263(Zf)/K562-Znf263-ChIP-Seq(GSE31477)/Homer	CVGTSCTCCC	1e-19	-44.69	0	12926	0.277	12008.3	0.2584
AT1G72740(MYBrelated)/colamp-AT1G72740-DAP-Seq(GSE60143)/Homer	NNWWAMCCTAAHWNN	1e-19	-44.4	0	10655	0.2284	9806.5	0.211
NAC2(NAC)/colamp-NAC2-DAP-Seq(GSE60143)/Homer	TDCTTGNNNNNCAAG	1e-19	-44.39	0	6030	0.1292	5370.7	0.1156
GBF3(bZIP)/Arabidopsis-GBF3-ChIP-Seq(GSE80564)/Homer	TGCCACGTSAYC	1e-19	-44.26	0	3174	0.068	2693.1	0.058
Tcf3(HMG)/mES-Tcf3-ChIP-Seq(GSE11724)/Homer	ASWTCAAAGG	1e-19	-44.09	0	3186	0.0683	2705.9	0.0582
ANAC028(NAC)/col-ANAC028-DAP-Seq(GSE60143)/Homer	WRCTTGNNNNNCAAG	1e-19	-43.91	0	6219	0.1333	5553.9	0.1195
LBD19(LOBAS2)/colamp-LBD19-DAP-Seq(GSE60143)/Homer	CCKGAAWTTCMGGAW	1e-18	-43.52	0	15912	0.341	14939.9	0.3215
Rfx2(HTH)/LoVo-RFX2-ChIP-Seq(GSE49402)/Homer	GTTGCCATGGCAACM	1e-18	-43.37	0	709	0.0152	495.1	0.0107
ANAC005(NAC)/col-ANAC005-DAP-Seq(GSE60143)/Homer	WVCTTVTWNHABAAG	1e-18	-43.24	0	5360	0.1149	4744.1	0.1021
X-box(HTH)/NPC-H3K4me1-ChIP-Seq(GSE16256)/Homer	GGTTGCCATGGCAA	1e-18	-43.14	0	1042	0.0223	778.1	0.0167
Dorsal(RHD)/Embryo-dl-ChIP-Seq(GSE65441)/Homer	GGGAAAAMCCCG	1e-18	-42.78	0	1804	0.0387	1451.2	0.0312
BBX31(Orphan)/col-BBX31-DAP-Seq(GSE60143)/Homer	NAAAAAGTDA	1e-18	-42.65	0	20527	0.44	19497.3	0.4196
COUP-TFII(NR)/K562-NR2F1-ChIP-Seq(Encode)/Homer	GKBCARAGGTCA	1e-18	-42.65	0	11231	0.2407	10381.4	0.2234
RFX(HTH)/K562-RFX3-ChIP-Seq(SRA012198)/Homer	CGGTTGCCATGGCAAC	1e-18	-42.6	0	604	0.0129	410.3	0.0088
ZNF7(Zf)/HepG2-ZNF7.Flag-ChIP-Seq(Encode)/Homer	CTGCCWVCTTTTRTA	1e-18	-42.52	0	5660	0.1213	5033.1	0.1083
ARE(NR)/LNCAP-AR-ChIP-Seq(GSE27824)/Homer	RGRACASNSTGTYCYB	1e-18	-42.4	0	2265	0.0485	1869.1	0.0402
bZIP16(bZIP)/colamp-bZIP16-DAP-Seq(GSE60143)/Homer	TGCCACGTGD	1e-18	-42.24	0	1653	0.0354	1318.1	0.0284
GATA20(C2C2gata)/colamp-GATA20-DAP-Seq(GSE60143)/Homer	TNGATCNDNM	1e-18	-42.23	0	18023	0.3863	17029.9	0.3665
Trl(Zf)/S2-GAGAfactor-ChIP-Seq(GSE40646)/Homer	RGAGAGAG	1e-18	-42.13	0	21058	0.4513	20029.4	0.4311
TEAD3(TEA)/HepG2-TEAD3-ChIP-Seq(Encode)/Homer	TRCATTCCAG	1e-18	-42.03	0	11715	0.2511	10857.8	0.2337
At1g49010(MYBrelated)/col-At1g49010-DAP-Seq(GSE60143)/Homer	RGATAASNTT	1e-18	-41.81	0	19189	0.4113	18184.6	0.3914
TCX2(CPP)/colamp-TCX2-DAP-Seq(GSE60143)/Homer	NNWWTTYRAAHN	1e-17	-41.38	0	19530	0.4186	18526.5	0.3987
At5g66730(C2H2)/colamp-At5g66730-DAP-Seq(GSE60143)/Homer	TTTGTCKTTTTK	1e-17	-41.21	0	3375	0.0723	2896	0.0623
ATY13(MYB)/col-ATY13-DAP-Seq(GSE60143)/Homer	YYYAACYRHH	1e-17	-41.06	0	26469	0.5673	25429.2	0.5473
ANAC046(NAC)/colamp-ANAC046-DAP-Seq(GSE60143)/Homer	ACACGYWAYC	1e-17	-41.01	0	16529	0.3543	15573.2	0.3352
Rfx1(HTH)/NPC-H3K4me1-ChIP-Seq(GSE16256)/Homer	KGTTGCCATGGCAA	1e-17	-40.92	0	1598	0.0343	1274	0.0274
ZNF341(Zf)/EBV-ZNF341-ChIP-Seq(GSE113194)/Homer	GGAACAGCCG	1e-17	-40.26	0	5237	0.1122	4649.5	0.1001
MYB56(MYB)/colamp-MYB56-DAP-Seq(GSE60143)/Homer	HTAACGRMHY	1e-17	-40.26	0	7833	0.1679	7124.9	0.1533
Chop(bZIP)/MEF-Chop-ChIP-Seq(GSE35681)/Homer	ATTGCATCAT	1e-17	-40.11	0	2602	0.0558	2188.7	0.0471
MyoD(bHLH)/Myotube-MyoD-ChIP-Seq(GSE21614)/Homer	RRCAGCTGYTSY	1e-17	-40.07	0	5414	0.116	4818.3	0.1037
At1g25550(G2like)/colamp-At1g25550-DAP-Seq(GSE60143)/Homer	NAGATTCY	1e-17	-40.06	0	13307	0.2852	12428.6	0.2675
ANAC038(NAC)/col-ANAC038-DAP-Seq(GSE60143)/Homer	ACACGTWAYC	1e-17	-39.9	0	17974	0.3852	17008.1	0.366
AT5G23930(mTERF)/col-AT5G23930-DAP-Seq(GSE60143)/Homer	GGCGGCTG	1e-17	-39.68	0	7398	0.1586	6712.7	0.1445
PSE(SNAPc)/K562-mStart-Seq/Homer	WAVTCACCMTAASYDAAAAG	1e-17	-39.61	0	5894	0.1263	5277.3	0.1136
IDD7(C2H2)/col-IDD7-DAP-Seq(GSE60143)/Homer	TTTGTCKTTTTN	1e-17	-39.3	0	4800	0.1029	4243.1	0.0913
dof43(C2C2dof)/colamp-dof43-DAP-Seq(GSE60143)/Homer	NAAAAAGTDA	1e-17	-39.2	0	19120	0.4098	18147.9	0.3906
TRP2(MYBrelated)/colamp-TRP2-DAP-Seq(GSE60143)/Homer	TAAACCCT	1e-16	-39.08	0	1951	0.0418	1599.4	0.0344
TF3A(C2H2)/col-TF3A-DAP-Seq(GSE60143)/Homer	NNDDGAGGAGGWNNN	1e-16	-38.98	0	11991	0.257	11157.5	0.2401
ANAC096(NAC)/colamp-ANAC096-DAP-Seq(GSE60143)/Homer	TACTTGWNNNWCAAG	1e-16	-38.9	0	6028	0.1292	5410.1	0.1164
Klf4(Zf)/mES-Klf4-ChIP-Seq(GSE11431)/Homer	GCCACACCCA	1e-16	-38.63	0	1785	0.0383	1451.7	0.0312
CEBP(bZIP)/ThioMac-CEBPb-ChIP-Seq(GSE21512)/Homer	ATTGCGCAAC	1e-16	-38.53	0	7567	0.1622	6884.8	0.1482
SOL1(CPP)/colamp-SOL1-DAP-Seq(GSE60143)/Homer	ATTTAAATHN	1e-16	-38.09	0	19427	0.4164	18464.4	0.3974
VND3(NAC)/colamp-VND3-DAP-Seq(GSE60143)/Homer	TRCTTGWDNHWCAAG	1e-16	-37.76	0	6094	0.1306	5482	0.118
TAGL1(MADS)/Tomato-TAGL1-ChIP-Seq(GSE116581)/Homer	CCAAAAATRG	1e-16	-37.54	0	13427	0.2878	12573.7	0.2706
At1g68670(G2like)/colamp-At1g68670-DAP-Seq(GSE60143)/Homer	WNWWHNRAAGATTCT	1e-15	-36.83	0	7498	0.1607	6833.9	0.1471
DMRT1(DM)/Testis-DMRT1-ChIP-Seq(GSE64892)/Homer	TWGHWACAWTGTWDC	1e-15	-36.62	0	2761	0.0592	2353.4	0.0506
GATA14(C2C2gata)/col-GATA14-DAP-Seq(GSE60143)/Homer	AYCAGATCTG	1e-15	-35.59	0	5727	0.1227	5150.3	0.1108
TATA-box/Drosophila-Promoters/Homer	CTATAAAAGCSV	1e-15	-35.51	0	1030	0.0221	791.1	0.017
Six2(Homeobox)/NephronProgenitor-Six2-ChIP-Seq(GSE39837)/Homer	GWAAYHTGAKMC	1e-15	-34.97	0	10247	0.2196	9505.7	0.2046
ATHB13(Homeobox)/col-ATHB13-DAP-Seq(GSE60143)/Homer	CAATAATT	1e-15	-34.93	0	15515	0.3325	14649.8	0.3153
COUP-TFII(NR)/Artia-Nr2f2-ChIP-Seq(GSE46497)/Homer	AGRGGTCA	1e-15	-34.69	0	12721	0.2727	11916.9	0.2565
ZNF467(Zf)/HEK293-ZNF467.GFP-ChIP-Seq(GSE58341)/Homer	TGGGGAAGGGCM	1e-14	-34.37	0	6531	0.14	5928.8	0.1276
ATHB6(Homeobox)/col-ATHB6-DAP-Seq(GSE60143)/Homer	AATGATTG	1e-14	-34.32	0	15883	0.3404	15018.6	0.3232
SUT1?/SacCer-Promoters/Homer	CCCCGCGC	1e-14	-34.06	0	28015	0.6005	27066.6	0.5825
MYB105(MYB)/colamp-MYB105-DAP-Seq(GSE60143)/Homer	RATWCCGTTA	1e-14	-34.02	0	6819	0.1462	6207.9	0.1336
ZNF143|STAF(Zf)/CUTLL-ZNF143-ChIP-Seq(GSE29600)/Homer	ATTTCCCAGVAKSCY	1e-14	-33.35	0	2446	0.0524	2080.5	0.0448
NFAT(RHD)/Jurkat-NFATC1-ChIP-Seq(Jolma_et_al.)/Homer	ATTTTCCATT	1e-14	-33.24	0	10475	0.2245	9745.3	0.2097
RKD2(RWPRK)/colamp-RKD2-DAP-Seq(GSE60143)/Homer	GACKTTTCRDCTTCC	1e-14	-33.08	0	6517	0.1397	5926.1	0.1275
AtIDD11(C2H2)/colamp-AtIDD11-DAP-Seq(GSE60143)/Homer	TTTGTCGTTT	1e-14	-33.01	0	4431	0.095	3940.2	0.0848
Tcf21(bHLH)/ArterySmoothMuscle-Tcf21-ChIP-Seq(GSE61369)/Homer	NAACAGCTGG	1e-14	-32.93	0	7243	0.1552	6624.1	0.1426
AT2G20110(CPP)/colamp-AT2G20110-DAP-Seq(GSE60143)/Homer	ATTYAAATHY	1e-14	-32.88	0	18485	0.3962	17600.7	0.3788
Atf7(bZIP)/3T3L1-Atf7-ChIP-Seq(GSE56872)/Homer	NGRTGACGTCAY	1e-14	-32.52	0	3589	0.0769	3150.5	0.0678
WRKY75(WRKY)/col-WRKY75-DAP-Seq(GSE60143)/Homer	CGTTGACTWW	1e-14	-32.48	0	8290	0.1777	7637.5	0.1644
LIN-39(Homeobox)/cElegans.L3-LIN39-ChIP-Seq(modEncode)/Homer	ATGATTRATG	1e-14	-32.43	0	15084	0.3233	14257.2	0.3068
SND3(NAC)/col-SND3-DAP-Seq(GSE60143)/Homer	CTTNHNNNDNAAGNH	1e-13	-31.68	0	6391	0.137	5819	0.1252
TRPS1(Zf)/MCF7-TRPS1-ChIP-Seq(GSE107013)/Homer	AGATAAGANN	1e-13	-31.15	0	21300	0.4565	20410.5	0.4393
VND4(NAC)/colamp-VND4-DAP-Seq(GSE60143)/Homer	WRCTTGWANWWCAAG	1e-13	-30.64	0	6022	0.1291	5474.4	0.1178
Pdx1(Homeobox)/Islet-Pdx1-ChIP-Seq(SRA008281)/Homer	YCATYAATCA	1e-13	-30.51	0	11491	0.2463	10765.2	0.2317
MGP(C2H2)/colamp-MGP-DAP-Seq(GSE60143)/Homer	TTTTGTCGTTTW	1e-13	-30.4	0	2853	0.0611	2475.3	0.0533
DMRT6(DM)/Testis-DMRT6-ChIP-Seq(GSE60440)/Homer	YDGHTACAWTGTADC	1e-13	-30.35	0	2117	0.0454	1794	0.0386
At3g04030(G2like)/col-At3g04030-DAP-Seq(GSE60143)/Homer	DRGAATCT	1e-13	-30.12	0	12016	0.2575	11282.9	0.2428
AT1G28160(AP2EREBP)/colamp-AT1G28160-DAP-Seq(GSE60143)/Homer	GGCGGCGG	1e-12	-29.91	0	4506	0.0966	4035.3	0.0868
CEBP:CEBP(bZIP)/MEF-Chop-ChIP-Seq(GSE35681)/Homer	NTNATGCAAYMNNHTGMAAY	1e-12	-29.89	0	1865	0.04	1564.1	0.0337
RARa(NR)/K562-RARa-ChIP-Seq(Encode)/Homer	TTGAMCTTTG	1e-12	-29.02	0	22347	0.479	21480.5	0.4623
NF1:FOXA1(CTF,Forkhead)/LNCAP-FOXA1-ChIP-Seq(GSE27824)/Homer	WNTGTTTRYTTTGGCA	1e-12	-28.99	0	718	0.0154	540.5	0.0116
EAR2(NR)/K562-NR2F6-ChIP-Seq(Encode)/Homer	NRBCARRGGTCA	1e-12	-28.82	0	9977	0.2138	9312	0.2004
ERF105(AP2EREBP)/colamp-ERF105-DAP-Seq(GSE60143)/Homer	TGGCGGCT	1e-12	-28.58	0	4342	0.0931	3890.8	0.0837
TEAD4(TEA)/Tropoblast-Tead4-ChIP-Seq(GSE37350)/Homer	CCWGGAATGY	1e-12	-28.56	0	7899	0.1693	7300.1	0.1571
WRKY15(WRKY)/col-WRKY15-DAP-Seq(GSE60143)/Homer	VGTTGACTWW	1e-12	-28.55	0	8510	0.1824	7891.1	0.1698
Atf2(bZIP)/3T3L1-Atf2-ChIP-Seq(GSE56872)/Homer	NRRTGACGTCAT	1e-12	-28.54	0	2412	0.0517	2076.1	0.0447
CEBP:AP1(bZIP)/ThioMac-CEBPb-ChIP-Seq(GSE21512)/Homer	DRTGTTGCAA	1e-12	-28.31	0	8340	0.1788	7729	0.1663
KLF10(Zf)/HEK293-KLF10.GFP-ChIP-Seq(GSE58341)/Homer	GGGGGTGTGTCC	1e-12	-28.13	0	3181	0.0682	2797.9	0.0602
EIL4(EIL)/Tomato-EIL4-ChIP-Seq(GSE116581)/Homer	GATTCAWTGAAT	1e-12	-28.07	0	1349	0.0289	1103.1	0.0237
NFkB-p65(RHD)/GM12787-p65-ChIP-Seq(GSE19485)/Homer	WGGGGATTTCCC	1e-12	-27.95	0	4505	0.0966	4050.9	0.0872
AT3G10030(Trihelix)/colamp-AT3G10030-DAP-Seq(GSE60143)/Homer	GCCGTTAA	1e-12	-27.89	0	4975	0.1066	4498.3	0.0968
VRN1(ABI3VP1)/col-VRN1-DAP-Seq(GSE60143)/Homer	TTTTTTTTTT	1e-12	-27.86	0	4459	0.0956	4007.2	0.0862
AT2G31460(REMB3)/col-AT2G31460-DAP-Seq(GSE60143)/Homer	WNWARWDGAAATGAT	1e-11	-27.58	0	4797	0.1028	4331.1	0.0932
RAV1(RAV)/colamp-RAV1-DAP-Seq(GSE60143)/Homer	TWWTTTCTGTTG	1e-11	-27.4	0	9125	0.1956	8500.2	0.1829
TEAD(TEA)/Fibroblast-PU.1-ChIP-Seq(Unpublished)/Homer	YCWGGAATGY	1e-11	-27.19	0	7391	0.1584	6824.4	0.1469
ERF115(AP2EREBP)/colamp-ERF115-DAP-Seq(GSE60143)/Homer	WTKRCGGCGB	1e-11	-27.17	0	4213	0.0903	3779.7	0.0813
NeuroG2(bHLH)/Fibroblast-NeuroG2-ChIP-Seq(GSE75910)/Homer	ACCATCTGTT	1e-11	-27.13	0	13012	0.2789	12294.7	0.2646
WRKY28(WRKY)/col-WRKY28-DAP-Seq(GSE60143)/Homer	BGTTGACTWH	1e-11	-26.91	0	11380	0.2439	10701.4	0.2303
WRKY33(WRKY)/col-WRKY33-DAP-Seq(GSE60143)/Homer	CGTTGACYAW	1e-11	-26.69	0	6593	0.1413	6060.5	0.1304
WRKY71(WRKY)/col-WRKY71-DAP-Seq(GSE60143)/Homer	CKTTGACYWW	1e-11	-26.33	0	6666	0.1429	6134.5	0.132
GRE(NR),IR3/A549-GR-ChIP-Seq(GSE32465)/Homer	NRGVACABNVTGTYCY	1e-11	-26.13	0	1210	0.0259	986.1	0.0212
AT2G28810(C2C2dof)/colamp-AT2G28810-DAP-Seq(GSE60143)/Homer	VAAAAAGTWA	1e-11	-26.07	0	25967	0.5566	25131.5	0.5409
ATHB23(ZFHD)/col-ATHB23-DAP-Seq(GSE60143)/Homer	HTAATTARNN	1e-11	-25.8	0	11611	0.2489	10941.1	0.2355
ANAC013(NAC)/col-ANAC013-DAP-Seq(GSE60143)/Homer	CTTGNNNNNCAAGNA	1e-11	-25.67	0	3328	0.0713	2954	0.0636
AT1G20910(ARID)/col-AT1G20910-DAP-Seq(GSE60143)/Homer	THAATTRAWN	1e-11	-25.59	0	18569	0.398	17786.2	0.3828
ANAC053(NAC)/colamp-ANAC053-DAP-Seq(GSE60143)/Homer	TDCTTGNNNNNCAAG	1e-11	-25.44	0	4282	0.0918	3859.7	0.0831
NTM2(NAC)/col-NTM2-DAP-Seq(GSE60143)/Homer	CTTRTNNNAYAAGBH	1e-10	-25.12	0	4949	0.1061	4498.4	0.0968
ABR1(AP2EREBP)/colamp-ABR1-DAP-Seq(GSE60143)/Homer	AAATGGCGGCGG	1e-10	-25.03	0	2700	0.0579	2367	0.0509
ANAC050(NAC)/colamp-ANAC050-DAP-Seq(GSE60143)/Homer	WNCTTGNNNNNCAAG	1e-10	-24.65	0	4424	0.0948	4001	0.0861
ERF2(AP2EREBP)/colamp-ERF2-DAP-Seq(GSE60143)/Homer	GGCGGCTG	1e-10	-24.57	0	1580	0.0339	1330.9	0.0286
ANAC057(NAC)/colamp-ANAC057-DAP-Seq(GSE60143)/Homer	DVCKTGNNNNNCAMG	1e-10	-24.12	0	5707	0.1223	5234.9	0.1127
Bapx1(Homeobox)/VertebralCol-Bapx1-ChIP-Seq(GSE36672)/Homer	TTRAGTGSYK	1e-10	-24.09	0	17964	0.385	17211.4	0.3704
REM19(REM)/colamp-REM19-DAP-Seq(GSE60143)/Homer	AAAAAAAA	1e-10	-24.08	0	11838	0.2537	11186.6	0.2407
E2F3(E2F)/MEF-E2F3-ChIP-Seq(GSE71376)/Homer	BTKGGCGGGAAA	1e-10	-23.84	0	3024	0.0648	2680.6	0.0577
WRKY20(WRKY)/col-WRKY20-DAP-Seq(GSE60143)/Homer	CKTTGACYWD	1e-10	-23.78	0	6468	0.1386	5970.4	0.1285
ZNF189(Zf)/HEK293-ZNF189.GFP-ChIP-Seq(GSE58341)/Homer	TGGAACAGMA	1e-10	-23.74	0	7448	0.1596	6917.3	0.1489
CDF3(C2C2dof)/colamp-CDF3-DAP-Seq(GSE60143)/Homer	AAAAGTRM	1e-10	-23.47	0	20807	0.446	20036.8	0.4312
LBD23(LOBAS2)/colamp-LBD23-DAP-Seq(GSE60143)/Homer	GCGNAWWWTNCGCYW	1e-10	-23.29	0	4450	0.0954	4038	0.0869
ERF1(AP2EREBP)/colamp-ERF1-DAP-Seq(GSE60143)/Homer	GGCGGCTR	1e-09	-22.99	0	1438	0.0308	1208.5	0.026
MYB96(MYB)/colamp-MYB96-DAP-Seq(GSE60143)/Homer	WGGTRGTTGG	1e-09	-22.87	0	7483	0.1604	6961.5	0.1498
Nkx2.1(Homeobox)/LungAC-Nkx2.1-ChIP-Seq(GSE43252)/Homer	RSCACTYRAG	1e-09	-22.83	0	22853	0.4898	22079.7	0.4752
SeqBias: CG-repeat	CGCGCGCGCG	1e-09	-22.82	0	4368	0.0936	3964.3	0.0853
Pax8(Paired,Homeobox)/Thyroid-Pax8-ChIP-Seq(GSE26938)/Homer	GTCATGCHTGRCTGS	1e-09	-22.82	0	2040	0.0437	1765.9	0.038
AARE(HLH)/mES-cMyc-ChIP-Seq/Homer	GATTGCATCA	1e-09	-22.81	0	1020	0.0219	829.7	0.0179
AT3G12130(C3H)/colamp-AT3G12130-DAP-Seq(GSE60143)/Homer	TMACTTTTTV	1e-09	-22.78	0	26573	0.5696	25789.3	0.555
NFY(CCAAT)/Promoter/Homer	RGCCAATSRG	1e-09	-22.44	0	6544	0.1403	6058.4	0.1304
ATHB5(HB)/colamp-ATHB5-DAP-Seq(GSE60143)/Homer	AATGATTG	1e-09	-21.94	0	12641	0.2709	12003.8	0.2583
ANAC083(NAC)/col-ANAC083-DAP-Seq(GSE60143)/Homer	CKTRWNNNWYAMGTA	1e-09	-21.68	0	6328	0.1356	5858.5	0.1261
Pit1+1bp(Homeobox)/GCrat-Pit1-ChIP-Seq(GSE58009)/Homer	ATGCATAATTCA	1e-09	-21.66	0	5101	0.1093	4677.7	0.1007
WRKY50(WRKY)/col-WRKY50-DAP-Seq(GSE60143)/Homer	NNTTGACTWNNGNNN	1e-09	-21.6	0	9141	0.1959	8587.4	0.1848
ZNF136(Zf)/HEK293-ZNF136.GFP-ChIP-Seq(GSE58341)/Homer	YTKGATAHAGTATTCTWGGTNGGCA	1e-09	-21.45	0	1147	0.0246	950.9	0.0205
WRKY29(WRKY)/colamp-WRKY29-DAP-Seq(GSE60143)/Homer	MGTTGACTTT	1e-09	-21.37	0	9215	0.1975	8662.4	0.1864
PAX5(Paired,Homeobox)/GM12878-PAX5-ChIP-Seq(GSE32465)/Homer	GCAGCCAAGCRTGACH	1e-09	-21.3	0	2408	0.0516	2119.6	0.0456
ANAC016(NAC)/col-ANAC016-DAP-Seq(GSE60143)/Homer	WNCTTGNNNNNCAMG	1e-09	-21.21	0	6022	0.1291	5568.6	0.1198
At3g45610(C2C2dof)/col-At3g45610-DAP-Seq(GSE60143)/Homer	TWACTTTTTS	1e-09	-21.05	0	20212	0.4332	19486.6	0.4194
AT5G61620(MYBrelated)/colamp-AT5G61620-DAP-Seq(GSE60143)/Homer	CTTATCCA	1e-09	-21.04	0	14817	0.3176	14155.7	0.3046
dof42(C2C2dof)/col-dof42-DAP-Seq(GSE60143)/Homer	AAAAAGGC	1e-09	-20.86	0	7488	0.1605	6990.7	0.1504
WRKY22(WRKY)/colamp-WRKY22-DAP-Seq(GSE60143)/Homer	WWAAAGTCAACK	1e-09	-20.85	0	5662	0.1214	5225.7	0.1125
TEAD2(TEA)/Py2T-Tead2-ChIP-Seq(GSE55709)/Homer	CCWGGAATGY	1e-09	-20.74	0	4909	0.1052	4502.6	0.0969
ANAC103(NAC)/col-ANAC103-DAP-Seq(GSE60143)/Homer	AACTTGNWNWNCAAG	1e-08	-20.6	0	3120	0.0669	2796.3	0.0602
ANAC020(NAC)/col-ANAC020-DAP-Seq(GSE60143)/Homer	DVCKTGHNNNDCAAG	1e-08	-20.51	0	4918	0.1054	4513.4	0.0971
GATA4(C2C2gata)/col-GATA4-DAP-Seq(GSE60143)/Homer	DDWTYAGATCTR	1e-08	-20.47	0	6621	0.1419	6155.6	0.1325
ASL18(LOBAS2)/colamp-ASL18-DAP-Seq(GSE60143)/Homer	CCGGAAAWTCMGGAR	1e-08	-20.34	0	12171	0.2609	11566.7	0.2489
CRC(C2C2YABBY)/col-CRC-DAP-Seq(GSE60143)/Homer	TWATSATA	1e-08	-20.03	0	15441	0.331	14786.9	0.3182
PBX2(Homeobox)/K562-PBX2-ChIP-Seq(Encode)/Homer	RTGATTKATRGN	1e-08	-19.92	0	9647	0.2068	9103.1	0.1959
WRKY24(WRKY)/colamp-WRKY24-DAP-Seq(GSE60143)/Homer	CGTTGACTWW	1e-08	-19.9	0	7320	0.1569	6839.9	0.1472
WRKY31(WRKY)/colamp-WRKY31-DAP-Seq(GSE60143)/Homer	NCGTTGACTWWK	1e-08	-19.75	0	6126	0.1313	5685.3	0.1224
WRKY3(WRKY)/col-WRKY3-DAP-Seq(GSE60143)/Homer	NCKTTGACYDDN	1e-08	-19.58	0	5524	0.1184	5106.3	0.1099
JGL(C2H2)/col-JGL-DAP-Seq(GSE60143)/Homer	ACYTTCAGTT	1e-08	-19.52	0	16601	0.3558	15939.8	0.343
dof24(C2C2dof)/col-dof24-DAP-Seq(GSE60143)/Homer	TWMCTTTTTG	1e-08	-19.4	0	22528	0.4829	21815.3	0.4695
TEAD1(TEAD)/HepG2-TEAD1-ChIP-Seq(Encode)/Homer	CYRCATTCCA	1e-08	-19.16	0	9939	0.213	9399.2	0.2023
ZNF415(Zf)/HEK293-ZNF415.GFP-ChIP-Seq(GSE58341)/Homer	GRTGMTRGAGCC	1e-08	-19.04	0	3598	0.0771	3264.9	0.0703
AT1G24250(Orphan)/col-AT1G24250-DAP-Seq(GSE60143)/Homer	KTDGTTGGTDGTTGG	1e-08	-19.02	0	2909	0.0623	2609.9	0.0562
ATHB6(Homeobox)/Arabidopsis-HB6-ChIP-Seq(GSE80564)/Homer	CAATNATTBN	1e-08	-18.93	0	9997	0.2143	9459.4	0.2036
Atoh1(bHLH)/Cerebellum-Atoh1-ChIP-Seq(GSE22111)/Homer	VNRVCAGCTGGY	1e-08	-18.68	0	8541	0.1831	8042.8	0.1731
GATA12(C2C2gata)/col-GATA12-DAP-Seq(GSE60143)/Homer	YAGATCTRAW	1e-08	-18.67	0	4931	0.1057	4545.7	0.0978
RAP26(AP2EREBP)/colamp-RAP26-DAP-Seq(GSE60143)/Homer	HDATGGCGGCGG	1e-08	-18.55	0	2987	0.064	2687.1	0.0578
AT5G05550(Trihelix)/col-AT5G05550-DAP-Seq(GSE60143)/Homer	HDNHDTCKCCGGMGA	1e-08	-18.52	0	8022	0.1719	7539.6	0.1623
WRKY6(WRKY)/colamp-WRKY6-DAP-Seq(GSE60143)/Homer	NCGTTGACTWWD	1e-08	-18.44	0	7484	0.1604	7017	0.151
HLH-1(bHLH)/cElegans-Embryo-HLH1-ChIP-Seq(modEncode)/Homer	RACAGCTGTTBH	1e-07	-18.39	0	7059	0.1513	6605.6	0.1422
ATHB34(ZFHD)/colamp-ATHB34-DAP-Seq(GSE60143)/Homer	TRATTARS	1e-07	-18.33	0	9995	0.2142	9466.3	0.2037
TCF4(bHLH)/SHSY5Y-TCF4-ChIP-Seq(GSE96915)/Homer	SMCATCTGKH	1e-07	-18.27	0	12358	0.2649	11782.5	0.2536
MYB113(MYB)/col-MYB113-DAP-Seq(GSE60143)/Homer	HNDAWTCMGTTAYWN	1e-07	-18.18	0	6980	0.1496	6531.2	0.1406
NFE2L2(bZIP)/HepG2-NFE2L2-ChIP-Seq(Encode)/Homer	AWWWTGCTGAGTCAT	1e-07	-18.17	0	542	0.0116	421	0.0091
ATHB24(ZFHD)/colamp-ATHB24-DAP-Seq(GSE60143)/Homer	TAATTAAS	1e-07	-18.16	0	9285	0.199	8775.5	0.1889
LMI1(HB)/colamp-LMI1-DAP-Seq(GSE60143)/Homer	AATTATTG	1e-07	-18.13	0	10587	0.2269	10048.3	0.2162
MYNN(Zf)/HEK293-MYNN.eGFP-ChIP-Seq(Encode)/Homer	TTCAAAWTAAAAGTC	1e-07	-18.06	0	3513	0.0753	3192.1	0.0687
At1g64620(C2C2dof)/colamp-At1g64620-DAP-Seq(GSE60143)/Homer	CACTTTTT	1e-07	-18.02	0	18520	0.3969	17864	0.3845
ERF4(AP2EREBP)/colamp-ERF4-DAP-Seq(GSE60143)/Homer	WDWTGGCGGCGG	1e-07	-18.02	0	2668	0.0572	2389.1	0.0514
MafA(bZIP)/Islet-MafA-ChIP-Seq(GSE30298)/Homer	TGCTGACTCA	1e-07	-17.91	0	6030	0.1292	5614.2	0.1208
At5g47390(MYBrelated)/col-At5g47390-DAP-Seq(GSE60143)/Homer	CTTATCCA	1e-07	-17.9	0	13104	0.2809	12521.7	0.2695
ERF73(AP2EREBP)/col-ERF73-DAP-Seq(GSE60143)/Homer	CCGCCGCC	1e-07	-17.83	0	1569	0.0336	1358.9	0.0292
AT3G52440(C2C2dof)/colamp-AT3G52440-DAP-Seq(GSE60143)/Homer	DTHACTTTTT	1e-07	-17.63	0	26491	0.5678	25798.7	0.5552
ERF104(AP2EREBP)/col-ERF104-DAP-Seq(GSE60143)/Homer	GGCGGCGG	1e-07	-17.36	0	2469	0.0529	2206.5	0.0475
HSF3(HSF)/colamp-HSF3-DAP-Seq(GSE60143)/Homer	NTTCTAGAAKCTTCT	1e-07	-17.35	0	11092	0.2377	10555.4	0.2272
DEL2(E2FDP)/col-DEL2-DAP-Seq(GSE60143)/Homer	WTTTCSCGCC	1e-07	-17.33	0	2104	0.0451	1862.1	0.0401
AT5G66940(C2C2dof)/col-AT5G66940-DAP-Seq(GSE60143)/Homer	NNHACTTTWT	1e-07	-17.24	0	24168	0.518	23488.2	0.5055
At5g29000(G2like)/col-At5g29000-DAP-Seq(GSE60143)/Homer	RGAATATTCYHH	1e-07	-17.12	0	3401	0.0729	3094.4	0.0666
Fra1(bZIP)/BT549-Fra1-ChIP-Seq(GSE46166)/Homer	NNATGASTCATH	1e-07	-17.09	0	5028	0.1078	4656.6	0.1002
Unknown2/Drosophila-Promoters/Homer	CATCMCTA	1e-07	-17.02	0	9586	0.2055	9087	0.1956
CHR(?)/Hela-CellCycle-Expression/Homer	SRGTTTCAAA	1e-07	-16.87	0	8415	0.1804	7945.1	0.171
BHLHA15(bHLH)/NIH3T3-BHLHB8.HA-ChIP-Seq(GSE119782)/Homer	NAMCAGCTGK	1e-07	-16.77	0	11110	0.2381	10582.7	0.2278
c-Jun-CRE(bZIP)/K562-cJun-ChIP-Seq(GSE31477)/Homer	ATGACGTCATCY	1e-07	-16.67	0	2279	0.0488	2032.2	0.0437
MYB3R4(MYB)/col-MYB3R4-DAP-Seq(GSE60143)/Homer	AWWTAACCGTTR	1e-07	-16.61	0	1079	0.0231	913	0.0196
bZIP18(bZIP)/colamp-bZIP18-DAP-Seq(GSE60143)/Homer	KGMCAGCTND	1e-07	-16.61	0	34152	0.732	33504.7	0.7211
MYB119(MYB)/colamp-MYB119-DAP-Seq(GSE60143)/Homer	YRACCGTTACDD	1e-07	-16.58	0	2439	0.0523	2185	0.047
ZNF317(Zf)/HEK293-ZNF317.GFP-ChIP-Seq(GSE58341)/Homer	GTCWGCTGTYYCTCT	1e-07	-16.4	0	743	0.0159	607.4	0.0131
ATHB40(HB)/col-ATHB40-DAP-Seq(GSE60143)/Homer	HCAATWATTG	1e-07	-16.38	0	11394	0.2442	10867.7	0.2339
WRKY55(WRKY)/col-WRKY55-DAP-Seq(GSE60143)/Homer	NCGTTGACTT	1e-07	-16.3	0	9730	0.2085	9238.3	0.1988
RIN(MADS)/Tomato-RIN-ChIP-Seq(GSE116581)/Homer	CYAAAAWWGG	1e-07	-16.28	0	14814	0.3175	14233.6	0.3063
GATA1(C2C2gata)/colamp-GATA1-DAP-Seq(GSE60143)/Homer	DDWWYYAGATCTRRW	1e-07	-16.21	0	3465	0.0743	3164.1	0.0681
Olig2(bHLH)/Neuron-Olig2-ChIP-Seq(GSE30882)/Homer	RCCATMTGTT	1e-06	-16.08	0	16854	0.3612	16252	0.3498
Six1(Homeobox)/Myoblast-Six1-ChIP-Chip(GSE20150)/Homer	GKVTCADRTTWC	1e-06	-15.99	0	2571	0.0551	2314.5	0.0498
ZNF652/HepG2-ZNF652.Flag-ChIP-Seq(Encode)/Homer	TTAACCCTTTVNKKN	1e-06	-15.71	0	2804	0.0601	2538.5	0.0546
Twist2(bHLH)/Myoblast-Twist2.Ty1-ChIP-Seq(GSE127998)/Homer	MCAGCTGBYH	1e-06	-15.63	0	13763	0.295	13209.8	0.2843
Hnf6b(Homeobox)/LNCaP-Hnf6b-ChIP-Seq(GSE106305)/Homer	TATTGAYY	1e-06	-15.43	0	10156	0.2177	9669.1	0.2081
HRE(HSF)/Striatum-HSF1-ChIP-Seq(GSE38000)/Homer	TTCTAGAABNTTCTA	1e-06	-15.42	0	2530	0.0542	2280.2	0.0491
PAX6(Paired,Homeobox)/Forebrain-Pax6-ChIP-Seq(GSE66961)/Homer	NGTGTTCAVTSAAGCGKAAA	1e-06	-15.41	0	790	0.0169	654.5	0.0141
At5g58900(MYBrelated)/colamp-At5g58900-DAP-Seq(GSE60143)/Homer	WWWTYTTATCTWWWW	1e-06	-15.34	0	17433	0.3736	16838.3	0.3624
At3g09600(MYBrelated)/colamp-At3g09600-DAP-Seq(GSE60143)/Homer	AAAATATCTT	1e-06	-15.26	0	7074	0.1516	6662.1	0.1434
ERF11(AP2EREBP)/col-ERF11-DAP-Seq(GSE60143)/Homer	RTGGCGGCGG	1e-06	-15.25	0	2013	0.0431	1792.2	0.0386
Atf1(bZIP)/K562-ATF1-ChIP-Seq(GSE31477)/Homer	GATGACGTCA	1e-06	-15.24	0	5390	0.1155	5028.3	0.1082
WRKY14(WRKY)/colamp-WRKY14-DAP-Seq(GSE60143)/Homer	NCGTTGACTTTN	1e-06	-15.13	0	4632	0.0993	4297.1	0.0925
Unknown3/Drosophila-Promoters/Homer	ACVAKCTGGCAGCGC	1e-06	-15.08	0	590	0.0126	475.2	0.0102
GATA3(Zf)/iTreg-Gata3-ChIP-Seq(GSE20898)/Homer	AGATAASR	1e-06	-15.05	0	15982	0.3425	15409.6	0.3316
bHLH157(bHLH)/col-bHLH157-DAP-Seq(GSE60143)/Homer	KACACGTCTCTY	1e-06	-14.99	0	1309	0.0281	1134.5	0.0244
At2g03500(G2like)/col-At2g03500-DAP-Seq(GSE60143)/Homer	WWAGAATATTCT	1e-06	-14.97	0	2906	0.0623	2642.7	0.0569
MYB3R1(MYB)/col-MYB3R1-DAP-Seq(GSE60143)/Homer	WWDTDACCGTTR	1e-06	-14.97	0	2144	0.046	1918.9	0.0413
ESE1(AP2EREBP)/col-ESE1-DAP-Seq(GSE60143)/Homer	GGCGGCGG	1e-06	-14.87	0	1737	0.0372	1535.9	0.0331
At5g08520(MYBrelated)/colamp-At5g08520-DAP-Seq(GSE60143)/Homer	ADBSTTATCY	1e-06	-14.72	0	10615	0.2275	10131.5	0.218
RRTF1(AP2EREBP)/colamp-RRTF1-DAP-Seq(GSE60143)/Homer	CCGCCGCHATTT	1e-06	-14.68	0	646	0.0138	527.8	0.0114
TCFL2(HMG)/K562-TCF7L2-ChIP-Seq(GSE29196)/Homer	ACWTCAAAGG	1e-06	-14.53	0	897	0.0192	756.8	0.0163
MYB30(MYB)/colamp-MYB30-DAP-Seq(GSE60143)/Homer	AGGTAGTTGG	1e-06	-14.44	0	8903	0.1908	8459.6	0.1821
Tal1	CATCTG	1e-06	-14.42	0	12623	0.2706	12109.7	0.2606
ANAC004(NAC)/colamp-ANAC004-DAP-Seq(GSE60143)/Homer	WNCTTVYNNNRBAAG	1e-06	-14.33	0	3398	0.0728	3119.5	0.0671
FUS3(ABI3VP1)/col-FUS3-DAP-Seq(GSE60143)/Homer	DNNWTNTGCATGKNN	1e-06	-14.23	0	8647	0.1853	8212.6	0.1767
ETS:E-box(ETS,bHLH)/HPC7-Scl-ChIP-Seq(GSE22178)/Homer	AGGAARCAGCTG	1e-06	-14.2	0	822	0.0176	689.2	0.0148
RLR1?/SacCer-Promoters/Homer	WTTTTCYYTTTT	1e-06	-14.19	0	10156	0.2177	9690.6	0.2086
AT3G09735(S1Falike)/col-AT3G09735-DAP-Seq(GSE60143)/Homer	TTCTAGAANMTTCTA	1e-06	-14.19	0	5158	0.1106	4817.2	0.1037
AT5G47660(Trihelix)/colamp-AT5G47660-DAP-Seq(GSE60143)/Homer	AWTTTTACCG	1e-05	-13.56	0	16864	0.3615	16311.6	0.351
HIC1(Zf)/Treg-ZBTB29-ChIP-Seq(GSE99889)/Homer	TGCCAGCB	1e-05	-13.49	0	14696	0.315	14170.3	0.305
EKLF(Zf)/Erythrocyte-Klf1-ChIP-Seq(GSE20478)/Homer	NWGGGTGTGGCY	1e-05	-13.47	0	1062	0.0228	915	0.0197
AT1G69570(C2C2dof)/col-AT1G69570-DAP-Seq(GSE60143)/Homer	WAAAAGTGHH	1e-05	-13.45	0	15243	0.3267	14711	0.3166
ANAC079(NAC)/colamp-ANAC079-DAP-Seq(GSE60143)/Homer	TACACGCAACCT	1e-05	-13.31	0	3031	0.065	2778.4	0.0598
ANAC058(NAC)/col-ANAC058-DAP-Seq(GSE60143)/Homer	TWCTTGTDNNACAAG	1e-05	-13.3	0	4647	0.0996	4334.7	0.0933
GATA11(C2C2gata)/col-GATA11-DAP-Seq(GSE60143)/Homer	DDHYYAGATCTR	1e-05	-13.26	0	3723	0.0798	3443.4	0.0741
Oct4(POU,Homeobox)/mES-Oct4-ChIP-Seq(GSE11431)/Homer	ATTTGCATAW	1e-05	-13.25	0	5566	0.1193	5225.2	0.1125
TGA5(bZIP)/col-TGA5-DAP-Seq(GSE60143)/Homer	NNGATGACGTCATCN	1e-05	-13.19	0	510	0.0109	411.9	0.0089
ANAC011(NAC)/col-ANAC011-DAP-Seq(GSE60143)/Homer	TDCTTGYRNNDCAAG	1e-05	-13.13	0	3197	0.0685	2939.7	0.0633
HAT2(Homeobox)/colamp-HAT2-DAP-Seq(GSE60143)/Homer	CYAATSATTR	1e-05	-13.08	0	10299	0.2207	9850.1	0.212
FOXA1:AR(Forkhead,NR)/LNCAP-AR-ChIP-Seq(GSE27824)/Homer	AGTAAACAAAAAAGAACAND	1e-05	-12.94	0	804	0.0172	679.4	0.0146
MYB3R5(MYB)/col-MYB3R5-DAP-Seq(GSE60143)/Homer	THYAACGGTHAWAWT	1e-05	-12.91	0	531	0.0114	431.9	0.0093
WRKY27(WRKY)/colamp-WRKY27-DAP-Seq(GSE60143)/Homer	NHGTTGACYTWD	1e-05	-12.9	0	8424	0.1806	8016.9	0.1725
At1g74840(MYBrelated)/col100-At1g74840-DAP-Seq(GSE60143)/Homer	YHTTATCCAWWT	1e-05	-12.79	0	9180	0.1968	8758.3	0.1885
Brn1(POU,Homeobox)/NPC-Brn1-ChIP-Seq(GSE35496)/Homer	TATGCWAATBAV	1e-05	-12.77	0	3660	0.0784	3388.5	0.0729
HDG7(HB)/col-HDG7-DAP-Seq(GSE60143)/Homer	WGCATTTAATGC	1e-05	-12.71	0	2507	0.0537	2283.5	0.0491
Brn2(POU,Homeobox)/NPC-Brn2-ChIP-Seq(GSE35496)/Homer	ATGAATATTC	1e-05	-12.63	0	1430	0.0306	1263.1	0.0272
EIN3(EIL)/col-EIN3-DAP-Seq(GSE60143)/Homer	ARATTCAATGWATYT	1e-05	-12.61	0	1854	0.0397	1663.1	0.0358
Nr5a2(NR)/mES-Nr5a2-ChIP-Seq(GSE19019)/Homer	BTCAAGGTCA	1e-05	-12.5	0	3946	0.0846	3667.9	0.0789
Prop1(Homeobox)/GHFT1-PROP1.biotin-ChIP-Seq(GSE77302)/Homer	NTAATBNAATTA	1e-05	-12.39	0	8987	0.1926	8576.8	0.1846
LBD13(LOBAS2)/colamp-LBD13-DAP-Seq(GSE60143)/Homer	KCCGTNWTTTBCGGC	1e-05	-12.38	0	3228	0.0692	2977.1	0.0641
AT3G57600(AP2EREBP)/col-AT3G57600-DAP-Seq(GSE60143)/Homer	GGCGGTGG	1e-05	-12.23	0	2522	0.0541	2302.1	0.0495
RAP212(AP2EREBP)/col-RAP212-DAP-Seq(GSE60143)/Homer	CGCCGCCATTTT	1e-05	-12.2	0	1714	0.0367	1534.7	0.033
GLIS3(Zf)/Thyroid-Glis3.GFP-ChIP-Seq(GSE103297)/Homer	CTCCCTGGGAGGCCN	1e-05	-12.13	0	9117	0.1954	8708.4	0.1874
HSF6(HSF)/col-HSF6-DAP-Seq(GSE60143)/Homer	TTYTAGAAGCTTCTA	1e-05	-12.07	0	2793	0.0599	2563.2	0.0552
ATHB21(HB)/colamp-ATHB21-DAP-Seq(GSE60143)/Homer	YCAATWAT	1e-05	-12.01	0	6534	0.14	6185.1	0.1331
GAGA-repeat/Arabidopsis-Promoters/Homer	CTCTCTCTCY	1e-05	-11.87	0	9625	0.2063	9211.5	0.1982
PRDM10(Zf)/HEK293-PRDM10.eGFP-ChIP-Seq(Encode)/Homer	TGGTACATTCCA	1e-05	-11.77	0	4918	0.1054	4617.1	0.0994
ZNF675(Zf)/HEK293-ZNF675.GFP-ChIP-Seq(GSE58341)/Homer	ARGAGGMCAAAATGW	1e-05	-11.7	0	1498	0.0321	1334	0.0287
At1g19000(MYBrelated)/colamp-At1g19000-DAP-Seq(GSE60143)/Homer	WWTGGATAADDT	1e-05	-11.69	0	10309	0.221	9886.9	0.2128
MYB94(MYB)/col-MYB94-DAP-Seq(GSE60143)/Homer	WGGTRGTTGGKA	1e-05	-11.64	0	3265	0.07	3021.6	0.065
HNF4a(NR),DR1/HepG2-HNF4a-ChIP-Seq(GSE25021)/Homer	CARRGKBCAAAGTYCA	0.0001	-11.49	0	4056	0.0869	3786.1	0.0815
E2F4(E2F)/K562-E2F4-ChIP-Seq(GSE31477)/Homer	GGCGGGAAAH	0.0001	-11.3	0	1648	0.0353	1479.3	0.0318
SEP3(MADS)/Arabidoposis-Flower-Sep3-ChIP-Seq/Homer	CCAAAAAGGG	0.0001	-11.16	0	14182	0.304	13712.6	0.2951
GRHL2(CP2)/HBE-GRHL2-ChIP-Seq(GSE46194)/Homer	AAACYKGTTWDACMRGTTTB	0.0001	-11.05	0	3211	0.0688	2976.4	0.0641
Oct6(POU,Homeobox)/NPC-Pou3f1-ChIP-Seq(GSE35496)/Homer	WATGCAAATGAG	0.0001	-11.03	0	4975	0.1066	4683.1	0.1008
E2FA(E2FDP)/colamp-E2FA-DAP-Seq(GSE60143)/Homer	WWTGGCGCCAWWWNN	0.0001	-10.96	0	1533	0.0329	1373.8	0.0296
HSFA6B(HSF)/colamp-HSFA6B-DAP-Seq(GSE60143)/Homer	NTTCTAGAANHTTCT	0.0001	-10.94	0	6633	0.1422	6299.9	0.1356
Nr5a2(NR)/Pancreas-LRH1-ChIP-Seq(GSE34295)/Homer	BTCAAGGTCA	0.0001	-10.88	0	5378	0.1153	5077.4	0.1093
AT3G58630(Trihelix)/col-AT3G58630-DAP-Seq(GSE60143)/Homer	TCTCCGGCGA	0.0001	-10.83	0	490	0.0105	403.5	0.0087
AT5G56840(MYBrelated)/colamp-AT5G56840-DAP-Seq(GSE60143)/Homer	TGGATAAGGT	0.0001	-10.81	0	13853	0.2969	13395.3	0.2883
AT2G20400(G2like)/colamp-AT2G20400-DAP-Seq(GSE60143)/Homer	DNVGAATATTCBNHN	0.0001	-10.77	0	1715	0.0368	1547.2	0.0333
REB1/SacCer-Promoters/Homer	KCCGGGTAAYRR	0.0001	-10.73	0	1439	0.0308	1286.4	0.0277
AtGRF6(GRF)/col-AtGRF6-DAP-Seq(GSE60143)/Homer	NTGTCAGADNNNNNN	0.0001	-10.66	0	9538	0.2044	9149.5	0.1969
GRF9(GRF)/colamp-GRF9-DAP-Seq(GSE60143)/Homer	NWCTGACANNNNNNN	0.0001	-10.57	0	8516	0.1825	8148.9	0.1754
At1g75490(AP2EREBP)/colamp-At1g75490-DAP-Seq(GSE60143)/Homer	CACCGMCT	0.0001	-10.56	0	6956	0.1491	6621.8	0.1425
ANL2(HB)/col-ANL2-DAP-Seq(GSE60143)/Homer	CATTAATTGC	0.0001	-10.28	0.0001	7460	0.1599	7119.5	0.1532
GFY(?)/Promoter/Homer	ACTACAATTCCC	0.0001	-10.26	0.0001	423	0.0091	345.5	0.0074
Oct11(POU,Homeobox)/NCIH1048-POU2F3-ChIP-seq(GSE115123)/Homer	GATTTGCATA	0.0001	-10.21	0.0001	3777	0.081	3533.5	0.076
ZNF264(Zf)/HEK293-ZNF264.GFP-ChIP-Seq(GSE58341)/Homer	RGGGCACTAACY	0.0001	-10.17	0.0001	4863	0.1042	4587.9	0.0987
ERF10(AP2EREBP)/col-ERF10-DAP-Seq(GSE60143)/Homer	RTGGCGGCGG	0.0001	-10.13	0.0001	1590	0.0341	1434.3	0.0309
BATF(bZIP)/Th17-BATF-ChIP-Seq(GSE39756)/Homer	DATGASTCAT	0.0001	-10.12	0.0001	5720	0.1226	5422.6	0.1167
CRE(bZIP)/Promoter/Homer	CSGTGACGTCAC	0.0001	-10.07	0.0001	1196	0.0256	1062.1	0.0229
ERF8(AP2EREBP)/colamp-ERF8-DAP-Seq(GSE60143)/Homer	CGCCGYCATW	0.0001	-10	0.0001	2713	0.0581	2509.1	0.054
Fra2(bZIP)/Striatum-Fra2-ChIP-Seq(GSE43429)/Homer	GGATGACTCATC	0.0001	-9.922	0.0001	3966	0.085	3720.2	0.0801
WRKY45(WRKY)/col-WRKY45-DAP-Seq(GSE60143)/Homer	HNNNKTTGACTWWNH	0.0001	-9.868	0.0001	4255	0.0912	4001.6	0.0861
LXRE(NR),DR4/RAW-LXRb.biotin-ChIP-Seq(GSE21512)/Homer	RGGTTACTANAGGTCA	0.0001	-9.829	0.0001	381	0.0082	309.5	0.0067
ERRg(NR)/Kidney-ESRRG-ChIP-Seq(GSE104905)/Homer	GTGACCTTGRVN	0.0001	-9.813	0.0001	6482	0.1389	6171.7	0.1328
Atf3(bZIP)/GBM-ATF3-ChIP-Seq(GSE33912)/Homer	DATGASTCATHN	0.0001	-9.718	0.0001	5791	0.1241	5498.2	0.1183
Nkx2.2(Homeobox)/NPC-Nkx2.2-ChIP-Seq(GSE61673)/Homer	BTBRAGTGSN	0.0001	-9.565	0.0001	15815	0.339	15364.5	0.3307
Nur77(NR)/K562-NR4A1-ChIP-Seq(GSE31363)/Homer	TGACCTTTNCNT	0.0001	-9.486	0.0001	1950	0.0418	1783.7	0.0384
AGL15(MADS)/col-AGL15-DAP-Seq(GSE60143)/Homer	TTTCCHWATWDGGAA	0.0001	-9.477	0.0001	2161	0.0463	1985.5	0.0427
At5g52660(MYBrelated)/colamp-At5g52660-DAP-Seq(GSE60143)/Homer	HAAAAATATCTW	0.0001	-9.474	0.0001	7174	0.1538	6854.6	0.1475
ZBTB12(Zf)/HEK293-ZBTB12.GFP-ChIP-Seq(GSE58341)/Homer	NGNTCTAGAACCNGV	0.0001	-9.432	0.0001	3333	0.0714	3114.4	0.067
HSFC1(HSF)/col-HSFC1-DAP-Seq(GSE60143)/Homer	HTTCTAGAADCTTCT	0.0001	-9.427	0.0001	2628	0.0563	2434.1	0.0524
WRKY65(WRKY)/colamp-WRKY65-DAP-Seq(GSE60143)/Homer	AWWWAGTCAACG	0.0001	-9.415	0.0001	4418	0.0947	4166.6	0.0897
EMB1789(C3H)/col-EMB1789-DAP-Seq(GSE60143)/Homer	TWTTTACCGYND	0.0001	-9.227	0.0002	4594	0.0985	4340.9	0.0934
bHLH80(bHLH)/col-bHLH80-DAP-Seq(GSE60143)/Homer	NNNNDCAASTTGHNN	0.001	-9.177	0.0002	7701	0.1651	7376.4	0.1587
At5g05790(MYBrelated)/col-At5g05790-DAP-Seq(GSE60143)/Homer	AYCTTATC	0.001	-9.15	0.0002	9488	0.2034	9131.2	0.1965
SF1(NR)/H295R-Nr5a1-ChIP-Seq(GSE44220)/Homer	CAAGGHCANV	0.001	-9.13	0.0002	3427	0.0735	3209.5	0.0691
FAR1(FAR1)/col-FAR1-DAP-Seq(GSE60143)/Homer	TKNNNYYCACGCGCY	0.001	-9.046	0.0002	315	0.0068	253.5	0.0055
JunB(bZIP)/DendriticCells-Junb-ChIP-Seq(GSE36099)/Homer	RATGASTCAT	0.001	-9.029	0.0002	4673	0.1002	4420.8	0.0951
ATHB7(Homeobox)/col-ATHB7-DAP-Seq(GSE60143)/Homer	AATGATTG	0.001	-9.028	0.0002	8716	0.1868	8375.6	0.1803
ERF3(AP2EREBP)/colamp-ERF3-DAP-Seq(GSE60143)/Homer	ATGGCGGCGG	0.001	-8.972	0.0002	1457	0.0312	1318.9	0.0284
Hoxb4(Homeobox)/ES-Hoxb4-ChIP-Seq(GSE34014)/Homer	TGATTRATGGCY	0.001	-8.958	0.0002	2079	0.0446	1912.8	0.0412
ERF5(AP2EREBP)/colamp-ERF5-DAP-Seq(GSE60143)/Homer	DCMGCCGCCA	0.001	-8.956	0.0002	934	0.02	824.4	0.0177
ZNF322(Zf)/HEK293-ZNF322.GFP-ChIP-Seq(GSE58341)/Homer	GAGCCTGGTACTGWGCCTGR	0.001	-8.918	0.0002	1720	0.0369	1570	0.0338
OCT4-SOX2-TCF-NANOG(POU,Homeobox,HMG)/mES-Oct4-ChIP-Seq(GSE11431)/Homer	ATTTGCATAACAATG	0.001	-8.892	0.0002	2558	0.0548	2373.2	0.0511
SeqBias: polyA-repeat	AAAAAAAAAA	0.001	-8.885	0.0002	46609	0.999	46389.1	0.9983
bHLH18(bHLH)/col-bHLH18-DAP-Seq(GSE60143)/Homer	CACGTGTTYCACGTG	0.001	-8.827	0.0003	126	0.0027	89.5	0.0019
Arnt:Ahr(bHLH)/MCF7-Arnt-ChIP-Seq(Lo_et_al.)/Homer	TBGCACGCAA	0.001	-8.706	0.0003	3921	0.084	3694.2	0.0795
HSF7(HSF)/colamp-HSF7-DAP-Seq(GSE60143)/Homer	TTCTAGAAGCTTCTA	0.001	-8.682	0.0003	2546	0.0546	2364.9	0.0509
WRKY43(WRKY)/colamp-WRKY43-DAP-Seq(GSE60143)/Homer	NCGTTGACTTTT	0.001	-8.473	0.0004	3242	0.0695	3039.2	0.0654
Brachyury(T-box)/Mesoendoderm-Brachyury-ChIP-exo(GSE54963)/Homer	ANTTMRCASBNNNGTGYKAAN	0.001	-8.363	0.0004	2434	0.0522	2260.5	0.0486
MYB118(MYB)/colamp-MYB118-DAP-Seq(GSE60143)/Homer	TAWCCGTTAC	0.001	-8.272	0.0004	2249	0.0482	2084	0.0448
NAM(NAC)/col-NAM-DAP-Seq(GSE60143)/Homer	RGTTRCGTRW	0.001	-8.233	0.0004	5806	0.1244	5539.4	0.1192
FRS9(ND)/col-FRS9-DAP-Seq(GSE60143)/Homer	RGAGAGAGAAAG	0.001	-8.193	0.0005	2576	0.0552	2399.6	0.0516
Myf5(bHLH)/GM-Myf5-ChIP-Seq(GSE24852)/Homer	BAACAGCTGT	0.001	-8.115	0.0005	4916	0.1054	4672.6	0.1006
AGL25(MADS)/colamp-AGL25-DAP-Seq(GSE60143)/Homer	TTTCCATWTWTGGAA	0.001	-8.114	0.0005	870	0.0186	770.1	0.0166
NRF1(NRF)/MCF7-NRF1-ChIP-Seq(Unpublished)/Homer	CTGCGCATGCGC	0.001	-8.004	0.0006	215	0.0046	168.5	0.0036
M1BP(Zf)/S2R+-M1BP-ChIP-Seq(GSE49842)/Homer	CAGTGTGACCGT	0.001	-8.004	0.0006	1612	0.0346	1475.4	0.0318
COG1(C2C2dof)/col-COG1-DAP-Seq(GSE60143)/Homer	DAAAAAGTGA	0.001	-7.935	0.0006	18496	0.3964	18065	0.3888
ANAC062(NAC)/colamp-ANAC062-DAP-Seq(GSE60143)/Homer	TACTTANTNWNYAAG	0.001	-7.927	0.0006	3535	0.0758	3331.4	0.0717
GT2(Trihelix)/colamp-GT2-DAP-Seq(GSE60143)/Homer	AMGGTAAAWWWN	0.001	-7.905	0.0006	13851	0.2969	13464.4	0.2898
CUC2(NAC)/colamp-CUC2-DAP-Seq(GSE60143)/Homer	TRCKTGTNNNWCAMG	0.001	-7.88	0.0006	2268	0.0486	2106.7	0.0453
ZSCAN22(Zf)/HEK293-ZSCAN22.GFP-ChIP-Seq(GSE58341)/Homer	SMCAGTCWGAKGGAGGAGGC	0.001	-7.869	0.0006	447	0.0096	378.3	0.0081
GATA19(C2C2gata)/colamp-GATA19-DAP-Seq(GSE60143)/Homer	ATCSGATCVG	0.001	-7.852	0.0006	524	0.0112	449.5	0.0097
CTCF(Zf)/CD4+-CTCF-ChIP-Seq(Barski_et_al.)/Homer	AYAGTGCCMYCTRGTGGCCA	0.001	-7.825	0.0007	696	0.0149	609.7	0.0131
Esrrb(NR)/mES-Esrrb-ChIP-Seq(GSE11431)/Homer	KTGACCTTGA	0.001	-7.771	0.0007	5173	0.1109	4929.4	0.1061
E2F6(E2F)/Hela-E2F6-ChIP-Seq(GSE31477)/Homer	GGCGGGAARN	0.001	-7.724	0.0007	2462	0.0528	2295.5	0.0494
ANAC075(NAC)/col-ANAC075-DAP-Seq(GSE60143)/Homer	CTTSWWNWWSAAGYT	0.001	-7.691	0.0008	2532	0.0543	2363.9	0.0509
At1g14580(C2H2)/colamp-At1g14580-DAP-Seq(GSE60143)/Homer	CASAAAAMGACAAAA	0.001	-7.687	0.0008	2447	0.0524	2281.6	0.0491
At3g11280(MYBrelated)/col-At3g11280-DAP-Seq(GSE60143)/Homer	GATAAGRT	0.001	-7.572	0.0008	9034	0.1936	8720.1	0.1877
AP-1(bZIP)/ThioMac-PU.1-ChIP-Seq(GSE21512)/Homer	VTGACTCATC	0.001	-7.557	0.0009	6329	0.1357	6064.9	0.1305
ASHR1(ND)/col-ASHR1-DAP-Seq(GSE60143)/Homer	NTGGTGAN	0.001	-7.294	0.0011	10074	0.2159	9751.5	0.2099
Unknown4/Drosophila-Promoters/Homer	AAAAATACCRMA	0.001	-7.278	0.0011	1901	0.0407	1760.2	0.0379
AT5G59990(C2C2COlike)/colamp-AT5G59990-DAP-Seq(GSE60143)/Homer	TCTCAACCGTTCATT	0.001	-7.165	0.0013	156	0.0033	119.1	0.0026
HRE(HSF)/HepG2-HSF1-ChIP-Seq(GSE31477)/Homer	BSTTCTRGAABVTTCYAGAA	0.001	-7.149	0.0013	1424	0.0305	1304.2	0.0281
At1g76110(ARID)/colamp-At1g76110-DAP-Seq(GSE60143)/Homer	ATTTAATG	0.001	-7.115	0.0013	8840	0.1895	8540.2	0.1838
Zfp809(Zf)/ES-Zfp809-ChIP-Seq(GSE70799)/Homer	GGGGCTYGKCTGGGA	0.001	-7.115	0.0013	1298	0.0278	1184.1	0.0255
Hand2(bHLH)/Mesoderm-Hand2-ChIP-Seq(GSE61475)/Homer	TGACANARRCCAGRC	0.001	-7.037	0.0014	3947	0.0846	3746.1	0.0806
Unknown1/Arabidopsis-Promoters/Homer	RGGGTAWWWTHGTAA	0.001	-7.025	0.0014	1026	0.022	926.1	0.0199
TGA1(bZIP)/colamp-TGA1-DAP-Seq(GSE60143)/Homer	TGACGTCAKC	0.001	-7.018	0.0014	2442	0.0523	2285.6	0.0492
GTL1(Trihelix)/colamp-GTL1-DAP-Seq(GSE60143)/Homer	WWTTTACCKY	0.001	-6.979	0.0015	13450	0.2883	13093.1	0.2818
WRKY26(WRKY)/colamp-WRKY26-DAP-Seq(GSE60143)/Homer	CGTTGACTWDKN	0.001	-6.938	0.0016	4378	0.0938	4168.2	0.0897
AGL6(MADS)/col-AGL6-DAP-Seq(GSE60143)/Homer	TTWCCWWAWWDGGWA	0.001	-6.928	0.0016	1748	0.0375	1617.2	0.0348
SND2(NAC)/colamp-SND2-DAP-Seq(GSE60143)/Homer	CTTVWNNNWBAAGNW	0.01	-6.874	0.0017	4179	0.0896	3975.4	0.0856
NAP(NAC)/col-NAP-DAP-Seq(GSE60143)/Homer	ARGTTACGTRTN	0.01	-6.866	0.0017	5043	0.1081	4819.5	0.1037
NFkB-p65-Rel(RHD)/ThioMac-LPS-Expression(GSE23622)/Homer	GGAAATTCCC	0.01	-6.821	0.0017	540	0.0116	470.7	0.0101
At2g41835(C2H2)/col-At2g41835-DAP-Seq(GSE60143)/Homer	TTTGAAAA	0.01	-6.787	0.0018	7667	0.1643	7394.9	0.1591
WRKY42(WRKY)/colamp-WRKY42-DAP-Seq(GSE60143)/Homer	NAAAGTCAACGN	0.01	-6.774	0.0018	2641	0.0566	2481.5	0.0534
AT3G42860(zfGRF)/col-AT3G42860-DAP-Seq(GSE60143)/Homer	CGTTGACTTN	0.01	-6.688	0.002	1986	0.0426	1849.4	0.0398
At4g18890(BZR)/col-At4g18890-DAP-Seq(GSE60143)/Homer	NDBRCACGTGYR	0.01	-6.668	0.002	1009	0.0216	913.4	0.0197
Unknown1(NR/Ini-like)/Drosophila-Promoters/Homer	MYGGTCACACTG	0.01	-6.506	0.0024	1418	0.0304	1305.1	0.0281
Gata2(Zf)/K562-GATA2-ChIP-Seq(GSE18829)/Homer	BBCTTATCTS	0.01	-6.456	0.0025	6678	0.1431	6430.4	0.1384
NF-E2(bZIP)/K562-NFE2-ChIP-Seq(GSE31477)/Homer	GATGACTCAGCA	0.01	-6.392	0.0027	422	0.009	364	0.0078
ZNF382(Zf)/HEK293-ZNF382.GFP-ChIP-Seq(GSE58341)/Homer	GNCTGTASTRNTGBCTCHTT	0.01	-6.38	0.0027	224	0.0048	182.5	0.0039
BAM8(BES1)/col-BAM8-DAP-Seq(GSE60143)/Homer	NNWSACACGTGTSWN	0.01	-6.297	0.0029	955	0.0205	865.5	0.0186
ANAC047(NAC)/colamp-ANAC047-DAP-Seq(GSE60143)/Homer	WACACGTAACTT	0.01	-6.263	0.003	3892	0.0834	3706.2	0.0798
Jun-AP1(bZIP)/K562-cJun-ChIP-Seq(GSE31477)/Homer	GATGASTCATCN	0.01	-6.253	0.003	1668	0.0358	1548.6	0.0333
PRDM14(Zf)/H1-PRDM14-ChIP-Seq(GSE22767)/Homer	RGGTCTCTAACY	0.01	-6.212	0.0031	2651	0.0568	2499.8	0.0538
T1ISRE(IRF)/ThioMac-Ifnb-Expression/Homer	ACTTTCGTTTCT	0.01	-6.025	0.0038	153	0.0033	120.2	0.0026
TGA4(bZIP)/colamp-TGA4-DAP-Seq(GSE60143)/Homer	RTGACGTCAKCW	0.01	-6.012	0.0038	1721	0.0369	1602.2	0.0345
GATA(Zf),IR4/iTreg-Gata3-ChIP-Seq(GSE20898)/Homer	NAGATWNBNATCTNN	0.01	-5.993	0.0039	909	0.0195	824.7	0.0177
Gata4(Zf)/Heart-Gata4-ChIP-Seq(GSE35151)/Homer	NBWGATAAGR	0.01	-5.908	0.0042	10699	0.2293	10405.9	0.2239
p53(p53)/Saos-p53-ChIP-Seq(GSE15780)/Homer	RRCATGYCYRGRCATGYYYN	0.01	-5.895	0.0043	659	0.0141	588.5	0.0127
p53(p53)/Saos-p53-ChIP-Seq/Homer	RRCATGYCYRGRCATGYYYN	0.01	-5.895	0.0043	659	0.0141	588.5	0.0127
MafF(bZIP)/HepG2-MafF-ChIP-Seq(GSE31477)/Homer	HWWGTCAGCAWWTTT	0.01	-5.881	0.0043	3322	0.0712	3157.2	0.0679
RORgt(NR)/EL4-RORgt.Flag-ChIP-Seq(GSE56019)/Homer	AAYTAGGTCA	0.01	-5.851	0.0045	1251	0.0268	1152.8	0.0248
RORgt(NR)/EL4-RORgt.Flag-ChIP-Seq(GSE56019)/Homer	AAYTAGGTCA	0.01	-5.851	0.0045	1251	0.0268	1152.8	0.0248
SOC1(MADS)/Seedling-SOC1-ChIP-Seq(GSE45846)/Homer	TWCCAWWTWTGG	0.01	-5.831	0.0045	4659	0.0999	4464.1	0.0961
CUC3(NAC)/col-CUC3-DAP-Seq(GSE60143)/Homer	TRCKTGWNNNACAMG	0.01	-5.739	0.005	2489	0.0533	2349.7	0.0506
AGL95(ND)/col-AGL95-DAP-Seq(GSE60143)/Homer	TTCTAGAAGCTTCTA	0.01	-5.732	0.005	1358	0.0291	1256.3	0.027
ANAC092(NAC)/colamp-ANAC092-DAP-Seq(GSE60143)/Homer	WRCKTGWNNNWCAMG	0.01	-5.718	0.0051	2857	0.0612	2707.7	0.0583
HIF-1b(HLH)/T47D-HIF1b-ChIP-Seq(GSE59937)/Homer	RTACGTGC	0.01	-5.693	0.0052	7042	0.1509	6806.9	0.1465
Fosl2(bZIP)/3T3L1-Fosl2-ChIP-Seq(GSE56872)/Homer	NATGASTCABNN	0.01	-5.66	0.0053	2428	0.052	2291.4	0.0493
WRKY30(WRKY)/colamp-WRKY30-DAP-Seq(GSE60143)/Homer	CGTTGACTTN	0.01	-5.622	0.0055	2116	0.0454	1989.7	0.0428
MafK(bZIP)/C2C12-MafK-ChIP-Seq(GSE36030)/Homer	GCTGASTCAGCA	0.01	-5.619	0.0055	1444	0.0309	1340.5	0.0288
WRKY40(WRKY)/colamp-WRKY40-DAP-Seq(GSE60143)/Homer	AHWAGTCAAC	0.01	-5.602	0.0056	5095	0.1092	4896.5	0.1054
REM16(ABI3VP1)/col-REM16-DAP-Seq(GSE60143)/Homer	DTTTTTSCCGSMAAA	0.01	-5.593	0.0057	5	0.0001	1.1	0
CAMTA5(CAMTA)/col-CAMTA5-DAP-Seq(GSE60143)/Homer	ACGCGTTTTANACRC	0.01	-5.582	0.0057	1537	0.0329	1430.5	0.0308
MYB44(MYB)/colamp-MYB44-DAP-Seq(GSE60143)/Homer	CVGTTWWKTCNGTTA	0.01	-5.575	0.0058	763	0.0164	689.4	0.0148
WRKY47(WRKY)/colamp-WRKY47-DAP-Seq(GSE60143)/Homer	WAAGTCAACGBT	0.01	-5.531	0.006	2062	0.0442	1938.4	0.0417
IDD2(C2H2)/colamp-IDD2-DAP-Seq(GSE60143)/Homer	HAVAAAAMGACAAAA	0.01	-5.514	0.0061	1703	0.0365	1591	0.0342
ANAC017(NAC)/colamp-ANAC017-DAP-Seq(GSE60143)/Homer	TMCTTGNNNNNCAAG	0.01	-5.494	0.0062	590	0.0126	526.7	0.0113
PPARE(NR),DR1/3T3L1-Pparg-ChIP-Seq(GSE13511)/Homer	TGACCTTTGCCCCA	0.01	-5.486	0.0063	7569	0.1622	7330.5	0.1578
ERF7(AP2EREBP)/col-ERF7-DAP-Seq(GSE60143)/Homer	ATGRCGGCGG	0.01	-5.482	0.0063	3837	0.0822	3667.7	0.0789
BORIS(Zf)/K562-CTCFL-ChIP-Seq(GSE32465)/Homer	CNNBRGCGCCCCCTGSTGGC	0.01	-5.3	0.0075	1010	0.0216	927.5	0.02
CArG(MADS)/PUER-Srf-ChIP-Seq(Sullivan_et_al.)/Homer	CCATATATGGNM	0.01	-5.298	0.0075	3138	0.0673	2988.5	0.0643
TGA6(bZIP)/colamp-TGA6-DAP-Seq(GSE60143)/Homer	TGACGTCABC	0.01	-5.202	0.0083	3378	0.0724	3224.3	0.0694
Phox2a(Homeobox)/Neuron-Phox2a-ChIP-Seq(GSE31456)/Homer	YTAATYNRATTA	0.01	-5.154	0.0087	5593	0.1199	5395.1	0.1161
JunD(bZIP)/K562-JunD-ChIP-Seq/Homer	ATGACGTCATCN	0.01	-5.15	0.0087	548	0.0117	489	0.0105
Tbx20(T-box)/Heart-Tbx20-ChIP-Seq(GSE29636)/Homer	GGTGYTGACAGS	0.01	-5.046	0.0096	1712	0.0367	1606.5	0.0346
E2F7(E2F)/Hela-E2F7-ChIP-Seq(GSE32673)/Homer	VDTTTCCCGCCA	0.01	-5.023	0.0098	368	0.0079	321.9	0.0069
Zfp57(Zf)/H1-ZFP57.HA-ChIP-Seq(GSE115387)/Homer	NANTGCSGCA	0.01	-4.999	0.01	1322	0.0283	1231	0.0265
E2F1(E2F)/Hela-E2F1-ChIP-Seq(GSE22478)/Homer	CWGGCGGGAA	0.01	-4.934	0.0107	736	0.0158	669.7	0.0144
At5g18450(AP2EREBP)/col-At5g18450-DAP-Seq(GSE60143)/Homer	CACCGCTT	0.01	-4.897	0.0111	5667	0.1215	5474	0.1178
MYB98(MYB)/col-MYB98-DAP-Seq(GSE60143)/Homer	NWDCCGTTAC	0.01	-4.87	0.0114	2092	0.0448	1977.3	0.0426
GATA6(C2C2gata)/col200-GATA6-DAP-Seq(GSE60143)/Homer	TAGATCTARAHH	0.01	-4.834	0.0118	1187	0.0254	1102.1	0.0237
Gata1(Zf)/K562-GATA1-ChIP-Seq(GSE18829)/Homer	SAGATAAGRV	0.01	-4.821	0.0119	5781	0.1239	5588.3	0.1203
CRF4(AP2EREBP)/colamp-CRF4-DAP-Seq(GSE60143)/Homer	CGCCGCCA	0.01	-4.792	0.0122	1095	0.0235	1014.3	0.0218
HDG1(Homeobox)/col100-HDG1-DAP-Seq(GSE60143)/Homer	DDYAATTAATGH	0.01	-4.77	0.0125	7906	0.1695	7682.8	0.1653
Pax7(Paired,Homeobox),long/Myoblast-Pax7-ChIP-Seq(GSE25064)/Homer	TAATCHGATTAC	0.01	-4.708	0.0133	368	0.0079	323.9	0.007
Gata6(Zf)/HUG1N-GATA6-ChIP-Seq(GSE51936)/Homer	YCTTATCTBN	0.01	-4.686	0.0136	9908	0.2124	9661.8	0.2079
THRa(NR)/C17.2-THRa-ChIP-Seq(GSE38347)/Homer	GGTCANYTGAGGWCA	0.1	-4.566	0.0153	2872	0.0616	2742.3	0.059
WRKY8(WRKY)/colamp-WRKY8-DAP-Seq(GSE60143)/Homer	CGTTGACTTT	0.1	-4.542	0.0156	1119	0.024	1040.1	0.0224
Unknown5/Drosophila-Promoters/Homer	GCTGATAASV	0.1	-4.531	0.0158	5271	0.113	5094.3	0.1096
WRKY21(WRKY)/colamp-WRKY21-DAP-Seq(GSE60143)/Homer	DCGTTGACTTTT	0.1	-4.458	0.0169	987	0.0212	914.3	0.0197
Srebp2(bHLH)/HepG2-Srebp2-ChIP-Seq(GSE31477)/Homer	CGGTCACSCCAC	0.1	-4.422	0.0175	872	0.0187	804.7	0.0173
THRb(NR)/HepG2-THRb.Flag-ChIP-Seq(Encode)/Homer	GGTCACCTGAGGTCA	0.1	-4.415	0.0176	3798	0.0814	3651.7	0.0786
CAMTA1(CAMTA)/col-CAMTA1-DAP-Seq(GSE60143)/Homer	WWAACGCGTT	0.1	-4.391	0.018	1562	0.0335	1470.2	0.0316
SHN3(AP2EREBP)/col-SHN3-DAP-Seq(GSE60143)/Homer	CCGCCGCC	0.1	-4.303	0.0197	584	0.0125	530.2	0.0114
GEI-11(Myb?)/cElegans-L4-GEI11-ChIP-Seq(modEncode)/Homer	CCGACAYYTYACGGG	0.1	-4.178	0.0222	213	0.0046	182.6	0.0039
AT5G63260(C3H)/col-AT5G63260-DAP-Seq(GSE60143)/Homer	RAAAAAGTRA	0.1	-4.157	0.0227	26468	0.5673	26130.6	0.5624
HOXA1(Homeobox)/mES-Hoxa1-ChIP-Seq(SRP084292)/Homer	TGATKGATGR	0.1	-4.141	0.023	2796	0.0599	2676.9	0.0576
LIN-15B(Zf)/cElegans-L3-LIN15B-ChIP-Seq(modEncode)/Homer	CARTGGAGCGCRYTTGCATT	0.1	-4.139	0.023	32	0.0007	21.5	0.0005
ANAC094(NAC)/col-ANAC094-DAP-Seq(GSE60143)/Homer	DVCGTRNNNNNYACG	0.1	-4.097	0.024	835	0.0179	772.7	0.0166
ZIM(C2C2gata)/col-ZIM-DAP-Seq(GSE60143)/Homer	ATCSRACGGTYRAGA	0.1	-4.074	0.0245	44	0.0009	31.6	0.0007
OCT:OCT(POU,Homeobox,IR1)/NPC-Brn2-ChIP-Seq(GSE35496)/Homer	ATGAATWATTCATGA	0.1	-4.071	0.0245	248	0.0053	215.2	0.0046
Cux2(Homeobox)/Liver-Cux2-ChIP-Seq(GSE35985)/Homer	HNRAATCAAT	0.1	-4.043	0.0252	5012	0.1074	4852.4	0.1044
ATHB53(HB)/col-ATHB53-DAP-Seq(GSE60143)/Homer	CAATAATT	0.1	-4.028	0.0255	7503	0.1608	7307.1	0.1573
SeqBias: G/A bias	RRRRRRRRRR	0.1	-4.017	0.0258	46656	1	46462.7	0.9999
Bach1(bZIP)/K562-Bach1-ChIP-Seq(GSE31477)/Homer	AWWNTGCTGAGTCAT	0.1	-4.015	0.0258	435	0.0093	391.9	0.0084
NUC(C2H2)/col-NUC-DAP-Seq(GSE60143)/Homer	HAVAAAACGACAAAA	0.1	-3.997	0.0262	1141	0.0245	1068.1	0.023
AGL63(MADS)/col-AGL63-DAP-Seq(GSE60143)/Homer	TTCCAAWWWTGG	0.1	-3.993	0.0263	10135	0.2172	9909.8	0.2133
BOS1(MYB)/col-BOS1-DAP-Seq(GSE60143)/Homer	NNRCCTAACT	0.1	-3.964	0.027	7661	0.1642	7466	0.1607
Zic(Zf)/Cerebellum-ZIC1.2-ChIP-Seq(GSE60731)/Homer	CCTGCTGAGH	0.1	-3.944	0.0276	5693	0.122	5525.2	0.1189
AT1G19040(NAC)/col-AT1G19040-DAP-Seq(GSE60143)/Homer	CTTGNDNHNCAAGYW	0.1	-3.904	0.0286	620	0.0133	568.6	0.0122
RBPJ:Ebox(?,bHLH)/Panc1-Rbpj1-ChIP-Seq(GSE47459)/Homer	GGGRAARRGRMCAGMTG	0.1	-3.868	0.0296	2683	0.0575	2571.4	0.0553
O2(bZIP)/Corn-O2-ChIP-Seq(GSE63991)/Homer	GCTGACGTGGCA	0.1	-3.864	0.0297	877	0.0188	815.2	0.0175
MafB(bZIP)/BMM-Mafb-ChIP-Seq(GSE75722)/Homer	WNTGCTGASTCAGCANWTTY	0.1	-3.852	0.03	3274	0.0702	3150.6	0.0678
HNF6(Homeobox)/Liver-Hnf6-ChIP-Seq(ERP000394)/Homer	NTATYGATCH	0.1	-3.745	0.0334	5951	0.1276	5785.5	0.1245
Tcf12(bHLH)/GM12878-Tcf12-ChIP-Seq(GSE32465)/Homer	VCAGCTGYTG	0.1	-3.725	0.034	6495	0.1392	6322.3	0.1361
TGA9(bZIP)/colamp-TGA9-DAP-Seq(GSE60143)/Homer	VTGACGTC	0.1	-3.691	0.0351	9027	0.1935	8824.5	0.1899
AGL16(MADS)/col-AGL16-DAP-Seq(GSE60143)/Homer	TWCCHWATWDGGAAA	0.1	-3.686	0.0352	1209	0.0259	1138.5	0.0245
BPC1(BBRBPC)/colamp-BPC1-DAP-Seq(GSE60143)/Homer	GARGAGAGAGAA	0.1	-3.569	0.0396	6796	0.1457	6624.7	0.1426
RORa(NR)/Liver-Rora-ChIP-Seq(GSE101115)/Homer	AAWCTAGGTCARDNN	0.1	-3.519	0.0415	1359	0.0291	1286.7	0.0277
MyoG(bHLH)/C2C12-MyoG-ChIP-Seq(GSE36024)/Homer	AACAGCTG	0.1	-3.508	0.0419	7192	0.1541	7017.7	0.151
LBD2(LOBAS2)/colamp-LBD2-DAP-Seq(GSE60143)/Homer	TCCGAWTTTTTCGGN	0.1	-3.45	0.0444	1545	0.0331	1468.6	0.0316
bZIP69(bZIP)/col-bZIP69-DAP-Seq(GSE60143)/Homer	GACAGCTGKCAW	0.1	-3.433	0.0451	825	0.0177	770.8	0.0166
Phox2b(Homeobox)/CLBGA-PHOX2B-ChIP-Seq(GSE90683)/Homer	TTAATTNAATTA	0.1	-3.419	0.0457	2960	0.0634	2852.9	0.0614
E2F(E2F)/Hela-CellCycle-Expression/Homer	TTSGCGCGAAAA	0.1	-3.407	0.0462	188	0.004	163.8	0.0035
RXR(NR),DR1/3T3L1-RXR-ChIP-Seq(GSE13511)/Homer	TAGGGCAAAGGTCA	0.1	-3.349	0.0488	8718	0.1869	8531.5	0.1836
ANAC087(NAC)/col-ANAC087-DAP-Seq(GSE60143)/Homer	WVCKTGHNNNWCAMG	0.1	-3.331	0.0496	1786	0.0383	1705.5	0.0367
CUC1(NAC)/col-CUC1-DAP-Seq(GSE60143)/Homer	TACTTGTNNNACAAG	0.1	-3.321	0.0501	3081	0.066	2973.8	0.064
HSFA1E(HSF)/col-HSFA1E-DAP-Seq(GSE60143)/Homer	TTCTAGAAGCTTCTA	0.1	-3.308	0.0507	1058	0.0227	997.4	0.0215
PPARa(NR),DR1/Liver-Ppara-ChIP-Seq(GSE47954)/Homer	VNAGGKCAAAGGTCA	0.1	-3.298	0.0511	8617	0.1847	8433.8	0.1815
bHLH122(bHLH)/col100-bHLH122-DAP-Seq(GSE60143)/Homer	NDDCAASTTGHHNWW	0.1	-3.262	0.0529	6740	0.1445	6579.5	0.1416
Nrf2(bZIP)/Lymphoblast-Nrf2-ChIP-Seq(GSE37589)/Homer	HTGCTGAGTCAT	0.1	-3.214	0.0554	346	0.0074	313.2	0.0067
Tcfcp2l1(CP2)/mES-Tcfcp2l1-ChIP-Seq(GSE11431)/Homer	NRAACCRGTTYRAACCRGYT	0.1	-3.204	0.0559	912	0.0195	857	0.0184
DAG2(C2C2dof)/col-DAG2-DAP-Seq(GSE60143)/Homer	WWTTHACTTTTT	0.1	-3.203	0.0559	21954	0.4706	21678	0.4665
JKD(C2H2)/col-JKD-DAP-Seq(GSE60143)/Homer	TTTTGTCGTTTT	0.1	-3.202	0.0559	2254	0.0483	2165.7	0.0466
TGA10(bZIP)/colamp-TGA10-DAP-Seq(GSE60143)/Homer	ATGACGTC	0.1	-3.193	0.0563	4156	0.0891	4033.8	0.0868
AT4G00250(GeBP)/col-AT4G00250-DAP-Seq(GSE60143)/Homer	WDTGGATAAKRT	0.1	-3.191	0.0563	6698	0.1436	6540.8	0.1408
AT2G01818(PLATZ)/col-AT2G01818-DAP-Seq(GSE60143)/Homer	TCTAGAABSTTC	0.1	-3.108	0.0611	1881	0.0403	1802.5	0.0388
TGA3(bZIP)/colamp-TGA3-DAP-Seq(GSE60143)/Homer	WTGATGACGTCATCW	0.1	-3.104	0.0612	267	0.0057	239	0.0051
FHY3(FAR1)/Arabidopsis-FHY3-ChIP-Seq(GSE30711)/Homer	HHCACGCGCBTN	0.1	-3.025	0.0662	926	0.0198	873.4	0.0188
GT1(Trihelix)/col-GT1-DAP-Seq(GSE60143)/Homer	TTAACCATGGTTAAD	0.1	-2.876	0.0767	130	0.0028	113	0.0024
Tbox:Smad(T-box,MAD)/ESCd5-Smad2_3-ChIP-Seq(GSE29422)/Homer	AGGTGHCAGACA	0.1	-2.866	0.0774	1228	0.0263	1169.6	0.0252
ZNF41(Zf)/HEK293-ZNF41.GFP-ChIP-Seq(GSE58341)/Homer	CCTCATGGTGYCYTWYTCCCTTGTG	0.1	-2.806	0.0821	215	0.0046	192.3	0.0041
PRDM15(Zf)/ESC-Prdm15-ChIP-Seq(GSE73694)/Homer	YCCDNTCCAGGTTTT	0.1	-2.769	0.0851	8729	0.1871	8565.2	0.1843
ZBTB18(Zf)/HEK293-ZBTB18.GFP-ChIP-Seq(GSE58341)/Homer	AACATCTGGA	0.1	-2.748	0.0868	3820	0.0819	3715.8	0.08
SRS7(SRS)/colamp-SRS7-DAP-Seq(GSE60143)/Homer	HATAGGTTTH	0.1	-2.687	0.0921	24939	0.5345	24677.7	0.5311
AT4G18450(AP2EREBP)/col-AT4G18450-DAP-Seq(GSE60143)/Homer	ATGGCGGCKG	0.1	-2.684	0.0922	853	0.0183	807.4	0.0174
EBF(EBF)/proBcell-EBF-ChIP-Seq(GSE21978)/Homer	DGTCCCYRGGGA	0.1	-2.664	0.094	1740	0.0373	1673.3	0.036
bZIP50(bZIP)/colamp-bZIP50-DAP-Seq(GSE60143)/Homer	GATGACGTCA	0.1	-2.645	0.0956	6259	0.1342	6126.8	0.1319
AT1G71450(AP2EREBP)/col-AT1G71450-DAP-Seq(GSE60143)/Homer	DHDWTGTCGGTG	0.1	-2.532	0.107	4455	0.0955	4348.1	0.0936
DEAR2(AP2EREBP)/colamp-DEAR2-DAP-Seq(GSE60143)/Homer	HCACCGACAWHD	0.1	-2.518	0.1083	3070	0.0658	2983.6	0.0642
ZNF519(Zf)/HEK293-ZNF519.GFP-ChIP-Seq(GSE58341)/Homer	GAGSCCGAGC	0.1	-2.45	0.1158	1028	0.022	981.3	0.0211
CCA(Myb)/Arabidopsis-CCA.GFP-ChIP-Seq(GSE70533)/Homer	AGATATYTTT	0.1	-2.428	0.1182	9868	0.2115	9709.4	0.209
OCT:OCT(POU,Homeobox)/NPC-Brn1-ChIP-Seq(GSE35496)/Homer	ATGAATATTCATGAG	0.1	-2.386	0.1231	95	0.002	82.5	0.0018
Unknown2/Arabidopsis-Promoters/Homer	AAACGACGTCGTTTT	0.1	-2.378	0.1239	38	0.0008	30.5	0.0007
dHNF4(NR)/Fly-HNF4-ChIP-Seq(GSE73675)/Homer	GGTCCAAAGTCCAMT	0.1	-2.375	0.124	357	0.0077	331.3	0.0071
WRKY11(WRKY)/col-WRKY11-DAP-Seq(GSE60143)/Homer	SCGTTGACTTTN	0.1	-2.358	0.1261	1010	0.0216	966	0.0208
AT2G15740(C2H2)/col-AT2G15740-DAP-Seq(GSE60143)/Homer	DHNDWATCGATD	0.1	-2.33	0.1295	5473	0.1173	5361.7	0.1154
ANAC042(NAC)/col-ANAC042-DAP-Seq(GSE60143)/Homer	CGTNDHNDHNACGKY	1	-2.29	0.1345	1385	0.0297	1333.6	0.0287
AT1G23810(Orphan)/col-AT1G23810-DAP-Seq(GSE60143)/Homer	TTCTAGAAGSTTCTA	1	-2.279	0.1359	567	0.0122	535	0.0115
BPC6(BBRBPC)/col-BPC6-DAP-Seq(GSE60143)/Homer	YTYTCTCTCTCTCTA	1	-2.22	0.1439	462	0.0099	434.5	0.0094
AIL7(AP2EREBP)/colamp-AIL7-DAP-Seq(GSE60143)/Homer	KCACRAWTYYCGAGG	1	-2.179	0.1498	3596	0.0771	3512.7	0.0756
AT2G28920(ND)/col-AT2G28920-DAP-Seq(GSE60143)/Homer	WAGATATTTWTW	1	-2.177	0.1498	3915	0.0839	3827.2	0.0824
AGL13(MADS)/col-AGL13-DAP-Seq(GSE60143)/Homer	TWCCAWWTWTGGWAA	1	-2.145	0.1546	631	0.0135	599.4	0.0129
HSFB4(HSF)/col-HSFB4-DAP-Seq(GSE60143)/Homer	TTCTAGAAGCTTCTA	1	-2.069	0.1665	457	0.0098	431.4	0.0093
LEP(AP2EREBP)/col-LEP-DAP-Seq(GSE60143)/Homer	CDCCGCCGTC	1	-2.033	0.1725	507	0.0109	480.9	0.0104
p73(p53)/Trachea-p73-ChIP-Seq(PRJNA310161)/Homer	NRRRCAWGTCCDGRCATGYY	1	-1.899	0.1969	299	0.0064	280.3	0.006
GATA:SCL(Zf,bHLH)/Ter119-SCL-ChIP-Seq(GSE18720)/Homer	CRGCTGBNGNSNNSAGATAA	1	-1.88	0.2004	949	0.0203	914.8	0.0197
ABF1/SacCer-Promoters/Homer	CGTRNAAARTGA	1	-1.851	0.2061	1082	0.0232	1045.5	0.0225
p63(p53)/Keratinocyte-p63-ChIP-Seq(GSE17611)/Homer	NNDRCATGYCYNRRCATGYH	1	-1.848	0.2063	2286	0.049	2230.8	0.048
NFAT:AP1(RHD,bZIP)/Jurkat-NFATC1-ChIP-Seq(Jolma_et_al.)/Homer	SARTGGAAAAWRTGAGTCAB	1	-1.831	0.2097	1968	0.0422	1917.4	0.0413
NFkB-p50,p52(RHD)/Monocyte-p50-ChIP-Chip(Schreiber_et_al.)/Homer	GGGGGAATCCCC	1	-1.788	0.2186	695	0.0149	667.5	0.0144
Oct2(POU,Homeobox)/Bcell-Oct2-ChIP-Seq(GSE21512)/Homer	ATATGCAAAT	1	-1.775	0.2211	3453	0.074	3385.9	0.0729
CUX1(Homeobox)/K562-CUX1-ChIP-Seq(GSE92882)/Homer	TATCGATNAN	1	-1.728	0.2314	7652	0.164	7547.7	0.1624
FXR(NR),IR1/Liver-FXR-ChIP-Seq(Chong_et_al.)/Homer	AGGTCANTGACCTB	1	-1.694	0.2391	2753	0.059	2696.7	0.058
ATHB20(Homeobox)/colamp-ATHB20-DAP-Seq(GSE60143)/Homer	CAATHATT	1	-1.685	0.2408	5763	0.1235	5676.4	0.1222
HAT1(Homeobox)/col-HAT1-DAP-Seq(GSE60143)/Homer	SCAATCATTGNN	1	-1.63	0.2543	2111	0.0452	2064.4	0.0444
WRKY46(WRKY)/colamp-WRKY46-DAP-Seq(GSE60143)/Homer	AAAGTCAACGSN	1	-1.621	0.2561	377	0.0081	359.6	0.0077
OBP4(C2C2dof)/col-OBP4-DAP-Seq(GSE60143)/Homer	WTTHACTTTTTB	1	-1.608	0.2592	18657	0.3999	18492.9	0.398
p53(p53)/mES-cMyc-ChIP-Seq(GSE11431)/Homer	ACATGCCCGGGCAT	1	-1.596	0.262	105	0.0023	96	0.0021
LHY(Myb)/Seedling-LHY-ChIP-Seq(GSE52175)/Homer	ADAAATATCT	1	-1.59	0.2632	11837	0.2537	11711	0.252
NRF(NRF)/Promoter/Homer	STGCGCATGCGC	1	-1.552	0.2731	460	0.0099	441.6	0.0095
Pknox1(Homeobox)/ES-Prep1-ChIP-Seq(GSE63282)/Homer	SCTGTCAVTCAV	1	-1.543	0.2752	1474	0.0316	1438.4	0.031
PHV(HB)/col-PHV-DAP-Seq(GSE60143)/Homer	RTAATSATTA	1	-1.506	0.2851	4818	0.1033	4748.6	0.1022
DREB2(AP2EREBP)/col-DREB2-DAP-Seq(GSE60143)/Homer	TMACCGACATWA	1	-1.471	0.295	1325	0.0284	1293.1	0.0278
CRF10(AP2EREBP)/col100-CRF10-DAP-Seq(GSE60143)/Homer	DCCGCCGYHA	1	-1.463	0.2971	2417	0.0518	2372.8	0.0511
Unknown3/Arabidopsis-Promoters/Homer	AYTAAACCGG	1	-1.405	0.3144	885	0.019	861	0.0185
GATA3(Zf),DR8/iTreg-Gata3-ChIP-Seq(GSE20898)/Homer	AGATSTNDNNDSAGATAASN	1	-1.389	0.3189	716	0.0153	695.1	0.015
Pitx1:Ebox(Homeobox,bHLH)/Hindlimb-Pitx1-ChIP-Seq(GSE41591)/Homer	YTAATTRAWWCCAGATGT	1	-1.382	0.3208	2412	0.0517	2370.1	0.051
HSF21(HSF)/col-HSF21-DAP-Seq(GSE60143)/Homer	CTTCTAGAAGMTTYW	1	-1.371	0.3239	1304	0.0279	1275.1	0.0274
At4g32800(AP2EREBP)/colamp-At4g32800-DAP-Seq(GSE60143)/Homer	DYCACCGACAHWWWH	1	-1.329	0.3375	336	0.0072	323.1	0.007
DREB19(AP2EREBP)/colamp-DREB19-DAP-Seq(GSE60143)/Homer	AATGTCGGTK	1	-1.317	0.3411	1516	0.0325	1486.8	0.032
RARg(NR)/ES-RARg-ChIP-Seq(GSE30538)/Homer	AGGTCAAGGTCA	1	-1.282	0.3526	187	0.004	178.7	0.0038
TR4(NR),DR1/Hela-TR4-ChIP-Seq(GSE24685)/Homer	GAGGTCAAAGGTCA	1	-1.27	0.3565	683	0.0146	665.7	0.0143
LCL1(MYBrelated)/colamp-LCL1-DAP-Seq(GSE60143)/Homer	NAAAATATCTWHWWN	1	-1.267	0.357	2142	0.0459	2107.5	0.0454
ZNF528(Zf)/HEK293-ZNF528.GFP-ChIP-Seq(GSE58341)/Homer	AGAAATGACTTCCCT	1	-1.25	0.3629	65	0.0014	60.9	0.0013
HSFB3(HSF)/colamp-HSFB3-DAP-Seq(GSE60143)/Homer	TTCTAGAAGMTTHTW	1	-1.226	0.3712	902	0.0193	882.9	0.019
ZML1(C2C2gata)/colamp-ZML1-DAP-Seq(GSE60143)/Homer	ATCWYRACCGTTSRW	1	-1.22	0.3727	45	0.001	41.2	0.0009
EBNA1(EBV-virus)/Raji-EBNA1-ChIP-Seq(GSE30709)/Homer	GGYAGCAYDTGCTDCCCNNN	1	-1.216	0.3738	71	0.0015	66.4	0.0014
ELT-3(Gata)/cElegans-L1-ELT3-ChIP-Seq(modEncode)/Homer	AWTGATAAGA	1	-1.201	0.3791	5229	0.1121	5172.4	0.1113
VDR(NR),DR3/GM10855-VDR+vitD-ChIP-Seq(GSE22484)/Homer	ARAGGTCANWGAGTTCANNN	1	-1.181	0.3861	1449	0.0311	1424.7	0.0307
GATA3(Zf),DR4/iTreg-Gata3-ChIP-Seq(GSE20898)/Homer	AGATGKDGAGATAAG	1	-1.174	0.3883	927	0.0199	908.7	0.0196
ARF16(ARF)/col-ARF16-DAP-Seq(GSE60143)/Homer	ATTTTACGAT	1	-1.165	0.3914	947	0.0203	928.4	0.02
AT3G60490(AP2EREBP)/colamp-AT3G60490-DAP-Seq(GSE60143)/Homer	NNRCCGACANNNNNN	1	-1.159	0.3934	716	0.0153	700.7	0.0151
ERF9(AP2EREBP)/colamp-ERF9-DAP-Seq(GSE60143)/Homer	AWATGGCGGCGG	1	-1.139	0.4009	456	0.0098	444.6	0.0096
PBX1(Homeobox)/MCF7-PBX1-ChIP-Seq(GSE28007)/Homer	GSCTGTCACTCA	1	-1.125	0.406	406	0.0087	395.5	0.0085
CTCF-SatelliteElement(Zf?)/CD4+-CTCF-ChIP-Seq(Barski_et_al.)/Homer	TGCAGTTCCMVNWRTGGCCA	1	-1.116	0.4092	96	0.0021	91	0.002
AT3G10113(MYBrelated)/col-AT3G10113-DAP-Seq(GSE60143)/Homer	WNAAATATCWWN	1	-1.101	0.4149	6013	0.1289	5957.7	0.1282
ATHB18(Homeobox)/colamp-ATHB18-DAP-Seq(GSE60143)/Homer	YCAATSATTG	1	-1.085	0.421	2284	0.049	2255	0.0485
NeuroD1(bHLH)/Islet-NeuroD1-ChIP-Seq(GSE30298)/Homer	GCCATCTGTT	1	-1.041	0.4393	6180	0.1325	6127.7	0.1319
bHLH130(bHLH)/col-bHLH130-DAP-Seq(GSE60143)/Homer	GCAACTTG	1	-1.035	0.4413	5583	0.1197	5534.9	0.1191
WRKY17(WRKY)/colamp-WRKY17-DAP-Seq(GSE60143)/Homer	GCGTTGACTTTT	1	-1.029	0.4437	86	0.0018	82.8	0.0018
MYB116(MYB)/colamp-MYB116-DAP-Seq(GSE60143)/Homer	AGTTAGGCAN	1	-1.021	0.4465	6078	0.1303	6027	0.1297
PAX5(Paired,Homeobox),condensed/GM12878-PAX5-ChIP-Seq(GSE32465)/Homer	GTCACGCTCSCTGM	1	-1.007	0.4523	593	0.0127	582.1	0.0125
SeqBias: C/A-bias	MMMMMMMMMM	1	-1.004	0.4524	46656	1	46465.6	1
Ik-1	NHTTGGGAATRCC	1	-1.004	0.4524	46656	1	46466.1	1
Reverb(NR),DR2/RAW-Reverba.biotin-ChIP-Seq(GSE45914)/Homer	GTRGGTCASTGGGTCA	1	-0.99	0.4582	830	0.0178	817.2	0.0176
SPL3(SBP)/colamp-SPL3-DAP-Seq(GSE60143)/Homer	WDTTGTACGGAH	1	-0.9691	0.4674	172	0.0037	167.3	0.0036
Pax7(Paired,Homeobox)/Myoblast-Pax7-ChIP-Seq(GSE25064)/Homer	TAATCAATTA	1	-0.9568	0.4725	1295	0.0278	1279.5	0.0275
At4g01280(MYBrelated)/colamp-At4g01280-DAP-Seq(GSE60143)/Homer	AAATATCT	1	-0.9507	0.4748	7744	0.166	7689.1	0.1655
GFY-Staf(?,Zf)/Promoter/Homer	RACTACAATTCCCAGAAKGC	1	-0.9476	0.4757	191	0.0041	186.9	0.004
CELF2(RRM)/JSL1-CELF2-CLIP-Seq(GSE71264)/Homer	RGTGTCAG	1	-0.9208	0.4881	2499	0.0536	2476.1	0.0533
GATA(Zf),IR3/iTreg-Gata3-ChIP-Seq(GSE20898)/Homer	NNNNNBAGATAWYATCTVHN	1	-0.9132	0.4912	1511	0.0324	1495.7	0.0322
PQM-1(?)/cElegans-L3-ChIP-Seq(modEncode)/Homer	ACTGATAAGA	1	-0.9029	0.4956	4166	0.0893	4134.4	0.089
TINY(AP2EREBP)/col-TINY-DAP-Seq(GSE60143)/Homer	NNCACCGACA	1	-0.8968	0.4981	669	0.0143	660.6	0.0142
Six4(Homeobox)/MCF7-SIX4-ChIP-Seq(Encode)/Homer	TGWAAYCTGABACCB	1	-0.8507	0.5209	448	0.0096	442.7	0.0095
VIP1(bZIP)/col-VIP1-DAP-Seq(GSE60143)/Homer	NTTGACAGCTGTCAN	1	-0.8386	0.5266	1354	0.029	1342.3	0.0289
AT1G76880(Trihelix)/col-AT1G76880-DAP-Seq(GSE60143)/Homer	ACGGTAAAAW	1	-0.8338	0.5285	4662	0.0999	4632.2	0.0997
Unknown-ESC-element(?)/mES-Nanog-ChIP-Seq(GSE11724)/Homer	CACAGCAGGGGG	1	-0.8155	0.5376	3928	0.0842	3903.9	0.084
Bach2(bZIP)/OCILy7-Bach2-ChIP-Seq(GSE44420)/Homer	TGCTGAGTCA	1	-0.8143	0.5376	1349	0.0289	1338.3	0.0288
Replumless(BLH)/Arabidopsis-RPL.GFP-ChIP-Seq(GSE78727)/Homer	HGTCWHATCA	1	-0.7631	0.5651	9630	0.2064	9583.4	0.2062
EPR1(MYBrelated)/colamp-EPR1-DAP-Seq(GSE60143)/Homer	AAATATCT	1	-0.7331	0.5809	5000	0.1072	4976.8	0.1071
LHY1(MYBrelated)/col-LHY1-DAP-Seq(GSE60143)/Homer	AAATATCT	1	-0.7331	0.5809	5000	0.1072	4976.8	0.1071
bHLH10(bHLH)/colamp-bHLH10-DAP-Seq(GSE60143)/Homer	YACCGACA	1	-0.6832	0.6099	736	0.0158	733.1	0.0158
At2g44940(AP2EREBP)/colamp-At2g44940-DAP-Seq(GSE60143)/Homer	NYACCGACAHNNNNN	1	-0.6712	0.6165	570	0.0122	568.5	0.0122
At1g36060(AP2EREBP)/colamp-At1g36060-DAP-Seq(GSE60143)/Homer	NNWWKGTCGGTG	1	-0.6593	0.6231	1831	0.0392	1826	0.0393
Unknown6/Drosophila-Promoters/Homer	AATTTTAAAA	1	-0.6557	0.6247	12812	0.2746	12765	0.2747
PLT1(AP2EREBP)/colamp-PLT1-DAP-Seq(GSE60143)/Homer	GCACGAWTYCCGAGG	1	-0.6517	0.6264	432	0.0093	431.6	0.0093
DUX(Homeobox)/C2C12-Dux-ChIP-Seq(GSE87279)/Homer	BCWGATTCAATCAAN	1	-0.6302	0.6393	33	0.0007	33.9	0.0007
At1g19210(AP2EREBP)/colamp-At1g19210-DAP-Seq(GSE60143)/Homer	HCACCGACCAHN	1	-0.6031	0.656	4450	0.0954	4439.5	0.0955
Srebp1a(bHLH)/HepG2-Srebp1a-ChIP-Seq(GSE31477)/Homer	RTCACSCCAY	1	-0.5692	0.6778	1432	0.0307	1432.8	0.0308
Tgif1(Homeobox)/mES-Tgif1-ChIP-Seq(GSE55404)/Homer	YTGWCADY	1	-0.562	0.6819	24910	0.5339	24827.2	0.5343
EFL-1(E2F)/cElegans-L1-EFL1-ChIP-Seq(modEncode)/Homer	TGCAARYGCGCTCYA	1	-0.5563	0.6849	81	0.0017	82.4	0.0018
SPL13(SBP)/col-SPL13-DAP-Seq(GSE60143)/Homer	WAHTGTACGGAH	1	-0.5454	0.6917	366	0.0078	368.3	0.0079
Gli2(Zf)/GM2-Gli2-ChIP-Chip(GSE112702)/Homer	YSTGGGTGGTCT	1	-0.5287	0.7025	1601	0.0343	1603.3	0.0345
ATHB15(HB)/col-ATHB15-DAP-Seq(GSE60143)/Homer	GYAATSATTA	1	-0.5114	0.7139	3818	0.0818	3818	0.0822
At4g38000(C2C2dof)/col-At4g38000-DAP-Seq(GSE60143)/Homer	WWWTWACTTTTT	1	-0.5088	0.7149	16700	0.3579	16658.3	0.3585
AT4G27900(C2C2COlike)/col-AT4G27900-DAP-Seq(GSE60143)/Homer	TCTCVACCGTTSATT	1	-0.4992	0.7209	28	0.0006	29.7	0.0006
Duxbl(Homeobox)/NIH3T3-Duxbl.HA-ChIP-Seq(GSE119782)/Homer	TAAYCYAATCAA	1	-0.4984	0.7209	733	0.0157	738	0.0159
SPL14(SBP)/col-SPL14-DAP-Seq(GSE60143)/Homer	NNWHTGTACGGAHNH	1	-0.4974	0.7209	691	0.0148	695.9	0.015
AT1G04880(ARID)/colamp-AT1G04880-DAP-Seq(GSE60143)/Homer	AAACTATATADTATA	1	-0.4934	0.7225	1778	0.0381	1782.8	0.0384
MYB107(MYB)/col-MYB107-DAP-Seq(GSE60143)/Homer	RGTWGGTRRR	1	-0.4856	0.7273	12684	0.2719	12660.3	0.2725
DPL-1(E2F)/cElegans-Adult-ChIP-Seq(modEncode)/Homer	TAGCGCGC	1	-0.4791	0.7311	1701	0.0365	1706.3	0.0367
CES-1(Homeobox)/cElegans-L1-CES1-ChIP-Seq(modEncode)/Homer	AAATTSAATTTN	1	-0.4717	0.7357	7882	0.1689	7875.4	0.1695
DUX4(Homeobox)/Myoblasts-DUX4.V5-ChIP-Seq(GSE75791)/Homer	NWTAAYCYAATCAWN	1	-0.4634	0.7409	513	0.011	518	0.0111
HOXA2(Homeobox)/mES-Hoxa2-ChIP-Seq(Donaldson_et_al.)/Homer	GYCATCMATCAT	1	-0.4614	0.7415	1008	0.0216	1014.8	0.0218
ZNF768(Zf)/Rajj-ZNF768-ChIP-Seq(GSE111879)/Homer	RHHCAGAGAGGB	1	-0.457	0.744	246	0.0053	250.5	0.0054
AT4G12670(MYBrelated)/col-AT4G12670-DAP-Seq(GSE60143)/Homer	AGGGTTTAGGGTTTA	1	-0.4563	0.744	1	0	1.9	0
YY1(Zf)/Promoter/Homer	CAAGATGGCGGC	1	-0.4552	0.744	239	0.0051	243.5	0.0052
bZIP42(bZIP)/colamp-bZIP42-DAP-Seq(GSE60143)/Homer	GCCACGTCAGCA	1	-0.4351	0.7577	13	0.0003	14.3	0.0003
At2g45680(TCP)/colamp-At2g45680-DAP-Seq(GSE60143)/Homer	GTGGGNCCCACNDND	1	-0.4228	0.7662	399	0.0086	405.2	0.0087
HAT5(Homeobox)/colamp-HAT5-DAP-Seq(GSE60143)/Homer	DCAATWATTG	1	-0.4223	0.7662	2026	0.0434	2036	0.0438
PUCHI(AP2EREBP)/colamp-PUCHI-DAP-Seq(GSE60143)/Homer	GCGCCGTY	1	-0.4121	0.7726	1155	0.0248	1164.4	0.0251
DDF2(AP2EREBP)/col-DDF2-DAP-Seq(GSE60143)/Homer	GATGTCGRCR	1	-0.4048	0.7774	124	0.0027	128	0.0028
RVE1(MYBrelated)/col-RVE1-DAP-Seq(GSE60143)/Homer	AAATATCT	1	-0.3967	0.7828	7235	0.1551	7240.1	0.1558
RORg(NR)/Liver-Rorc-ChIP-Seq(GSE101115)/Homer	WAABTAGGTCAV	1	-0.3834	0.7924	891	0.0191	901.1	0.0194
HNF1b(Homeobox)/PDAC-HNF1B-ChIP-Seq(GSE64557)/Homer	GTTAATNATTAA	1	-0.3724	0.8002	1931	0.0414	1944.2	0.0418
Zic3(Zf)/mES-Zic3-ChIP-Seq(GSE37889)/Homer	GGCCYCCTGCTGDGH	1	-0.3495	0.8177	3591	0.077	3607.4	0.0776
PRDM9(Zf)/Testis-DMC1-ChIP-Seq(GSE35498)/Homer	ADGGYAGYAGCATCT	1	-0.3222	0.8394	3003	0.0644	3022.5	0.065
GFX(?)/Promoter/Homer	ATTCTCGCGAGA	1	-0.3219	0.8394	15	0.0003	17.3	0.0004
HIF-1a(bHLH)/MCF7-HIF1a-ChIP-Seq(GSE28352)/Homer	TACGTGCV	1	-0.3145	0.8439	1520	0.0326	1538	0.0331
HSFA6A(HSF)/col-HSFA6A-DAP-Seq(GSE60143)/Homer	RGAAGNTTCTAGAAN	1	-0.2966	0.8581	477	0.0102	489.4	0.0105
ZFP3(Zf)/HEK293-ZFP3.GFP-ChIP-Seq(GSE58341)/Homer	GGGTTTTGAAGGATGARTAGGAGTT	1	-0.2838	0.8682	11	0.0002	13.5	0.0003
SeqBias: polyC-repeat	CCCCCCCCCC	1	-0.2772	0.8729	46288	0.9921	46112.4	0.9924
RAR:RXR(NR),DR5/ES-RAR-ChIP-Seq(GSE56893)/Homer	RGGTCADNNAGAGGTCAV	1	-0.2615	0.8858	182	0.0039	191.9	0.0041
Pbx3(Homeobox)/GM12878-PBX3-ChIP-Seq(GSE32465)/Homer	SCTGTCAMTCAN	1	-0.259	0.8869	1503	0.0322	1525.7	0.0328
Unknown4/Arabidopsis-Promoters/Homer	CKTCKTCTTY	1	-0.241	0.902	8405	0.1801	8436.1	0.1816
bZIP44(bZIP)/colamp-bZIP44-DAP-Seq(GSE60143)/Homer	NDTGCCACGTCAGCH	1	-0.217	0.9228	99	0.0021	107.9	0.0023
DREF/Drosophila-Promoters/Homer	AVYTATCGATAD	1	-0.2044	0.9335	68	0.0015	75.3	0.0016
CDM1(C3H)/colamp-CDM1-DAP-Seq(GSE60143)/Homer	CCGAWAWTWTCGGAN	1	-0.1889	0.9469	396	0.0085	413	0.0089
ESE3(AP2EREBP)/col-ESE3-DAP-Seq(GSE60143)/Homer	GACGGTGG	1	-0.1798	0.9545	3217	0.069	3257.7	0.0701
CEJ1(AP2EREBP)/col-CEJ1-DAP-Seq(GSE60143)/Homer	WWTGTCGGTG	1	-0.1781	0.9551	2875	0.0616	2914.2	0.0627
GLI3(Zf)/Limb-GLI3-ChIP-Chip(GSE11077)/Homer	CGTGGGTGGTCC	1	-0.1628	0.9686	685	0.0147	709.8	0.0153
ZNF692(Zf)/HEK293-ZNF692.GFP-ChIP-Seq(GSE58341)/Homer	GTGGGCCCCA	1	-0.147	0.983	916	0.0196	945.8	0.0204
ERE(NR),IR3/MCF7-ERa-ChIP-Seq(Unpublished)/Homer	VAGGTCACNSTGACC	1	-0.1433	0.9854	1604	0.0344	1641	0.0353
ZBTB33(Zf)/GM12878-ZBTB33-ChIP-Seq(GSE32465)/Homer	GGVTCTCGCGAGAAC	1	-0.1402	0.9874	68	0.0015	78	0.0017
MYB13(MYB)/col-MYB13-DAP-Seq(GSE60143)/Homer	HYCACCWACCHH	1	-0.1395	0.9874	5211	0.1117	5266.1	0.1133
DEL1(E2FDP)/colamp-DEL1-DAP-Seq(GSE60143)/Homer	TTCCCGCCAA	1	-0.1365	0.9888	7	0.0002	10.8	0.0002
RAR:RXR(NR),DR5/ES-RAR-ChIP-Seq(GSE56893)/Homer	AGGTCAAGGTCA	1	-0.1276	0.9965	758	0.0162	787.1	0.0169
PLT3(AP2EREBP)/col-PLT3-DAP-Seq(GSE60143)/Homer	GCACGNWTHYCGAGG	1	-0.1248	0.9982	289	0.0062	308.2	0.0066
SPL5(SBP)/colamp-SPL5-DAP-Seq(GSE60143)/Homer	NNHGTACGGHNN	1	-0.1204	1	1930	0.0414	1974.6	0.0425
SVP(MADS)/col-SVP-DAP-Seq(GSE60143)/Homer	ANTTWCCHAATTTGG	1	-0.1184	1	7002	0.1501	7067.3	0.1521
Mouse_Recombination_Hotspot(Zf)/Testis-DMC1-ChIP-Seq(GSE24438)/Homer	ACTYKNATTCGTGNTACTTC	1	-0.1174	1	686	0.0147	715.7	0.0154
CBF3(AP2EREBP)/colamp-CBF3-DAP-Seq(GSE60143)/Homer	YNRCCGACATNN	1	-0.1155	1	1186	0.0254	1223.5	0.0263
WRKY7(WRKY)/colamp-WRKY7-DAP-Seq(GSE60143)/Homer	AAAAGTCAACGSHWD	1	-0.1128	1	10	0.0002	14.2	0.0003
HINFP(Zf)/K562-HINFP.eGFP-ChIP-Seq(Encode)/Homer	TWVGGTCCGC	1	-0.1004	1	830	0.0178	864.1	0.0186
Pax7(Paired,Homeobox),longest/Myoblast-Pax7-ChIP-Seq(GSE25064)/Homer	NTAATTDGCYAATTANNWWD	1	-0.09873	1	311	0.0067	333.8	0.0072
At4g28140(AP2EREBP)/colamp-At4g28140-DAP-Seq(GSE60143)/Homer	DCCACCGACCAW	1	-0.08947	1	789	0.0169	824.5	0.0177
AT5G22990(C2H2)/col-AT5G22990-DAP-Seq(GSE60143)/Homer	WCGAHDTCGWHN	1	-0.08588	1	223	0.0048	243.9	0.0052
At1g13300(G2like)/col-At1g13300-DAP-Seq(GSE60143)/Homer	GAATCTWAGATTCYN	1	-0.07976	1	84	0.0018	97.9	0.0021
BZR1(BZR)/col-BZR1-DAP-Seq(GSE60143)/Homer	NNCRCACGTGCG	1	-0.07469	1	476	0.0102	506.2	0.0109
At5g65130(AP2EREBP)/colamp-At5g65130-DAP-Seq(GSE60143)/Homer	CCRCCGACAWTN	1	-0.07196	1	496	0.0106	527.7	0.0114
Rap210(AP2EREBP)/col-Rap210-DAP-Seq(GSE60143)/Homer	TGTCGGCA	1	-0.06027	1	1514	0.0325	1568.7	0.0338
MYB93(MYB)/colamp-MYB93-DAP-Seq(GSE60143)/Homer	GGTAGGTGRD	1	-0.05962	1	9028	0.1935	9125.7	0.1964
RAP21(AP2EREBP)/colamp-RAP21-DAP-Seq(GSE60143)/Homer	BCACCGACAHNN	1	-0.05883	1	455	0.0098	487.1	0.0105
AT1G10720(BSD)/col-AT1G10720-DAP-Seq(GSE60143)/Homer	TTCTAGAAKCTTCTA	1	-0.05872	1	340	0.0073	369	0.0079
AT3G16280(AP2EREBP)/colamp-AT3G16280-DAP-Seq(GSE60143)/Homer	HCACCGACAHHDHHN	1	-0.05609	1	890	0.0191	934.3	0.0201
AT1G12630(AP2EREBP)/colamp-AT1G12630-DAP-Seq(GSE60143)/Homer	TGTCGGCA	1	-0.05222	1	1350	0.0289	1404.2	0.0302
SFP1/SacCer-Promoters/Homer	DDAAAAATTTTY	1	-0.04836	1	1388	0.0297	1444.6	0.0311
At4g16750(AP2EREBP)/col-At4g16750-DAP-Seq(GSE60143)/Homer	HACCGACAHA	1	-0.04754	1	2031	0.0435	2098	0.0452
AT1G01250(AP2EREBP)/col-AT1G01250-DAP-Seq(GSE60143)/Homer	YCACCGACAHTW	1	-0.04216	1	196	0.0042	220.2	0.0047
REST-NRSF(Zf)/Jurkat-NRSF-ChIP-Seq/Homer	GGMGCTGTCCATGGTGCTGA	1	-0.04211	1	24	0.0005	33.3	0.0007
At1g77640(AP2EREBP)/col-At1g77640-DAP-Seq(GSE60143)/Homer	TGTCGGTGGA	1	-0.03952	1	479	0.0103	516.6	0.0111
AS2(LOBAS2)/col-AS2-DAP-Seq(GSE60143)/Homer	CCGDAAWWHMCGSCG	1	-0.03786	1	88	0.0019	105.7	0.0023
ZNF165(Zf)/WHIM12-ZNF165-ChIP-Seq(GSE65937)/Homer	AAGGKGRCGCAGGCA	1	-0.03364	1	702	0.015	748.3	0.0161
OCT:OCT(POU,Homeobox)/NPC-OCT6-ChIP-Seq(GSE43916)/Homer	YATGCATATRCATRT	1	-0.03354	1	1045	0.0224	1100.4	0.0237
TGA2(bZIP)/colamp-TGA2-DAP-Seq(GSE60143)/Homer	ACGTCAYCHH	1	-0.03197	1	2777	0.0595	2861.5	0.0616
AT1G77200(AP2EREBP)/colamp-AT1G77200-DAP-Seq(GSE60143)/Homer	ACCGACAHWD	1	-0.03075	1	2043	0.0438	2118.1	0.0456
TOD6?/SacCer-Promoters/Homer	GCGATGAGMT	1	-0.02952	1	1094	0.0234	1152.2	0.0248
At5g08330(TCP)/col-At5g08330-DAP-Seq(GSE60143)/Homer	GGRCCCAC	1	-0.02898	1	3683	0.0789	3779.2	0.0813
ZKSCAN1(Zf)/HepG2-ZKSCAN1-ChIP-Seq(Encode)/Homer	GCACAYAGTAGGKCY	1	-0.02817	1	156	0.0033	180.3	0.0039
Hnf1(Homeobox)/Liver-Foxa2-Chip-Seq(GSE25694)/Homer	GGTTAAWCATTAA	1	-0.02813	1	1697	0.0364	1768.6	0.0381
LOB(LOBAS2)/col-LOB-DAP-Seq(GSE60143)/Homer	CGCCGKAWWTTHCGS	1	-0.02107	1	405	0.0087	445.3	0.0096
bHLH28(bHLH)/col-bHLH28-DAP-Seq(GSE60143)/Homer	NHHTGTACGGAH	1	-0.01982	1	1069	0.0229	1132.7	0.0244
TCP20(TCP)/col-TCP20-DAP-Seq(GSE60143)/Homer	GGDCCCAC	1	-0.01953	1	2006	0.043	2089.1	0.045
CBF4(AP2EREBP)/colamp-CBF4-DAP-Seq(GSE60143)/Homer	NRCCGACDWNNNNNN	1	-0.01424	1	1767	0.0379	1851.2	0.0398
HIF2a(bHLH)/785_O-HIF2a-ChIP-Seq(GSE34871)/Homer	GCACGTACCC	1	-0.01312	1	2109	0.0452	2201.7	0.0474
Ronin(THAP)/ES-Thap11-ChIP-Seq(GSE51522)/Homer	RACTACAACTCCCAGVAKGC	1	-0.01272	1	51	0.0011	68.7	0.0015
DEAR5(AP2EREBP)/col-DEAR5-DAP-Seq(GSE60143)/Homer	NDWTGTCGGTGRWDN	1	-0.01206	1	391	0.0084	435.1	0.0094
CBF1(AP2EREBP)/colamp-CBF1-DAP-Seq(GSE60143)/Homer	YRCCGACATN	1	-0.01123	1	1681	0.036	1767.1	0.038
DREB26(AP2EREBP)/col-DREB26-DAP-Seq(GSE60143)/Homer	CCACCGACAH	1	-0.01045	1	577	0.0124	631.5	0.0136
Tgif2(Homeobox)/mES-Tgif2-ChIP-Seq(GSE55404)/Homer	TGTCANYT	1	-0.01003	1	26009	0.5575	26151.9	0.5628
ZNF669(Zf)/HEK293-ZNF669.GFP-ChIP-Seq(GSE58341)/Homer	GARTGGTCATCGCCC	1	-0.008514	1	360	0.0077	405.6	0.0087
At5g22890(C2H2)/col-At5g22890-DAP-Seq(GSE60143)/Homer	NSAGGTKWTATCTGD	1	-0.008505	1	279	0.006	319.5	0.0069
MYB57(MYB)/col-MYB57-DAP-Seq(GSE60143)/Homer	TTACCTAACT	1	-0.006674	1	4232	0.0907	4369.9	0.094
SeqBias: GCW-triplet	GCWGCWGCWGCW	1	-0.005637	1	46645	0.9998	46461.9	0.9999
MYB61(MYB)/colamp-MYB61-DAP-Seq(GSE60143)/Homer	HCYACCTACC	1	-0.005363	1	11697	0.2507	11888.6	0.2559
Meis1(Homeobox)/MastCells-Meis1-ChIP-Seq(GSE48085)/Homer	VGCTGWCAVB	1	-0.00522	1	12153	0.2605	12346.5	0.2657
MYB83(MYB)/colamp-MYB83-DAP-Seq(GSE60143)/Homer	CACCAACCWH	1	-0.004942	1	14153	0.3033	14351	0.3089
TCP7(TCP)/col-TCP7-DAP-Seq(GSE60143)/Homer	GTGGGSCCCACHHNN	1	-0.004787	1	3052	0.0654	3179.7	0.0684
DDF1(AP2EREBP)/col-DDF1-DAP-Seq(GSE60143)/Homer	GCCGACAT	1	-0.00409	1	1108	0.0237	1192.7	0.0257
CBF2(AP2EREBP)/colamp-CBF2-DAP-Seq(GSE60143)/Homer	YBRCCGACATNNNNN	1	-0.003933	1	1184	0.0254	1271.8	0.0274
At4g31060(AP2EREBP)/colamp-At4g31060-DAP-Seq(GSE60143)/Homer	CACCGACAAW	1	-0.003672	1	1044	0.0224	1127.6	0.0243
Tbr1(T-box)/Cortex-Tbr1-ChIP-Seq(GSE71384)/Homer	AAGGTGTKAA	1	-0.002601	1	12866	0.2758	13083.5	0.2816
At1g22810(AP2EREBP)/colamp-At1g22810-DAP-Seq(GSE60143)/Homer	BCACCGACANNN	1	-0.002316	1	1096	0.0235	1186.9	0.0255
MYB58(MYB)/colamp-MYB58-DAP-Seq(GSE60143)/Homer	YYYACCWACC	1	-0.001181	1	7569	0.1622	7781.6	0.1675
ERF38(AP2EREBP)/col-ERF38-DAP-Seq(GSE60143)/Homer	CACCGACA	1	-0.00095	1	1110	0.0238	1210.5	0.0261
AT1G44830(AP2EREBP)/col-AT1G44830-DAP-Seq(GSE60143)/Homer	NCCACCGACA	1	-0.000798	1	825	0.0177	914.1	0.0197
PTF1(TCP)/colamp-PTF1-DAP-Seq(GSE60143)/Homer	RDDGGGACCACA	1	-0.000283	1	502	0.0108	580.2	0.0125
TCP17(TCP)/col-TCP17-DAP-Seq(GSE60143)/Homer	GTGGTCCCCA	1	-0.000261	1	249	0.0053	306.6	0.0066
ZNF16(Zf)/HEK293-ZNF16.GFP-ChIP-Seq(GSE58341)/Homer	MACCTTCYATGGCTCCCTAKTGCCY	1	-0.000253	1	50	0.0011	78.6	0.0017
MYB63(MYB)/col-MYB63-DAP-Seq(GSE60143)/Homer	BHYACCWACCHH	1	-0.000213	1	3429	0.0735	3616.3	0.0778
At1g72010(TCP)/colamp-At1g72010-DAP-Seq(GSE60143)/Homer	GGDCCCAC	1	-0.000157	1	2758	0.0591	2933.9	0.0631
STOP1(C2H2)/colamp-STOP1-DAP-Seq(GSE60143)/Homer	DTATCTGGKGRAGGT	1	-9.3e-05	1	3170	0.0679	3364	0.0724
DEAR3(AP2EREBP)/colamp-DEAR3-DAP-Seq(GSE60143)/Homer	BCACCGACAWNNNNN	1	-2.6e-05	1	867	0.0186	987	0.0212
HAP3(CCAATHAP3)/col-HAP3-DAP-Seq(GSE60143)/Homer	TGATGGAW	1	-2.2e-05	1	2800	0.06	3002.4	0.0646
At1g69690(TCP)/colamp-At1g69690-DAP-Seq(GSE60143)/Homer	NHGTGGGGCCCACHW	1	-1.7e-05	1	1355	0.029	1504.4	0.0324
TCP1(TCP)/col-TCP1-DAP-Seq(GSE60143)/Homer	GGGGGCCCMMCN	1	-1.3e-05	1	1964	0.0421	2143.8	0.0461
Twist(bHLH)/HMLE-TWIST1-ChIP-Seq(Chang_et_al)/Homer	VCAKCTGGNNNCCAGMTGBN	1	-1e-05	1	824	0.0177	948	0.0204
Knotted(Homeobox)/Corn-KN1-ChIP-Seq(GSE39161)/Homer	GAYGNGACRGGN	1	-9e-06	1	9654	0.2069	9992.5	0.215
MYB62(MYB)/colamp-MYB62-DAP-Seq(GSE60143)/Homer	NTACCTAACT	1	-7e-06	1	10812	0.2317	11164.6	0.2403
TSO1(CPP)/col-TSO1-DAP-Seq(GSE60143)/Homer	RAATTTRAAW	1	-3e-06	1	2047	0.0439	2244.5	0.0483
AT4G26030(C2H2)/col-AT4G26030-DAP-Seq(GSE60143)/Homer	BYYACCWACY	1	-3e-06	1	7824	0.1677	8161.4	0.1756
MYB55(MYB)/colamp-MYB55-DAP-Seq(GSE60143)/Homer	YACCWAMC	1	-1e-06	1	8545	0.1831	8916.4	0.1919
MYB39(MYB)/col-MYB39-DAP-Seq(GSE60143)/Homer	WWAARKTAGGTGRAA	1	-1e-06	1	1441	0.0309	1622.9	0.0349
MYB17(MYB)/colamp-MYB17-DAP-Seq(GSE60143)/Homer	GGTAGGTGRG	1	0	1	3715	0.0796	3993.2	0.0859
MYB27(MYB)/colamp-MYB27-DAP-Seq(GSE60143)/Homer	TACCTAACWT	1	0	1	1668	0.0358	1877	0.0404
AT3G51470(DBP)/col-AT3G51470-DAP-Seq(GSE60143)/Homer	TTWHGGTGCACC	1	0	1	10836	0.2323	11281.5	0.2428
TCP3(TCP)/colamp-TCP3-DAP-Seq(GSE60143)/Homer	WGTGGTCCCAAHWWW	1	0	1	1708	0.0366	1933.5	0.0416
MS188(MYB)/colamp-MS188-DAP-Seq(GSE60143)/Homer	WARKTAGGTRRA	1	0	1	7473	0.1602	7899.1	0.17
LRF(Zf)/Erythroblasts-ZBTB7A-ChIP-Seq(GSE74977)/Homer	AAGACCCYYN	1	0	1	8280	0.1775	8727.8	0.1878
TCP16(TCP)/colamp-TCP16-DAP-Seq(GSE60143)/Homer	GTGGDCCYNNNNNNN	1	0	1	3549	0.0761	3875.6	0.0834
WIP5(C2H2)/colamp-WIP5-DAP-Seq(GSE60143)/Homer	TDTTCTCMAGGT	1	0	1	8868	0.1901	9368.7	0.2016
MYB99(MYB)/colamp-MYB99-DAP-Seq(GSE60143)/Homer	GGTAGGTG	1	0	1	6689	0.1434	7164	0.1542
MYB51(MYB)/col-MYB51-DAP-Seq(GSE60143)/Homer	GGTAGGTG	1	0	1	5965	0.1279	6430.5	0.1384
MYB40(MYB)/col-MYB40-DAP-Seq(GSE60143)/Homer	TGGTAGGTRARA	1	0	1	2616	0.0561	2960	0.0637
MYB3(MYB)/Arabidopsis-MYB3-ChIP-Seq(GSE80564)/Homer	GKTAGGTRGG	1	0	1	12181	0.2611	12791.5	0.2753
MYB67(MYB)/col-MYB67-DAP-Seq(GSE60143)/Homer	YYYACCTAAC	1	0	1	7550	0.1618	8084.6	0.174
AT3G10580(MYBrelated)/colamp-AT3G10580-DAP-Seq(GSE60143)/Homer	TACCTAACWNHW	1	0	1	3694	0.0792	4100.2	0.0882
MYB92(MYB)/colamp-MYB92-DAP-Seq(GSE60143)/Homer	GGTAGGTR	1	0	1	6761	0.1449	7280.3	0.1567
ATY19(MYB)/col-ATY19-DAP-Seq(GSE60143)/Homer	YYCACCWACCAT	1	0	1	5415	0.1161	5895.9	0.1269
MYB74(MYB)/colamp-MYB74-DAP-Seq(GSE60143)/Homer	YYYACCTACCWH	1	0	1	5174	0.1109	5650.3	0.1216
MYB121(MYB)/col-MYB121-DAP-Seq(GSE60143)/Homer	YNTACCTAACWW	1	0	1	3163	0.0678	3556.3	0.0765
ZML2(C2C2gata)/col-ZML2-DAP-Seq(GSE60143)/Homer	CATCATCATC	1	0	1	1483	0.0318	1768.2	0.0381
Eomes(T-box)/H9-Eomes-ChIP-Seq(GSE26097)/Homer	ATTAACACCT	1	0	1	18956	0.4063	19661.7	0.4231
MYB49(MYB)/col-MYB49-DAP-Seq(GSE60143)/Homer	ARKTAGGTRR	1	0	1	9283	0.199	9890.6	0.2129
MYB10(MYB)/col-MYB10-DAP-Seq(GSE60143)/Homer	YCCACCTACCHH	1	0	1	2864	0.0614	3252.2	0.07
Ascl1(bHLH)/NeuralTubes-Ascl1-ChIP-Seq(GSE55840)/Homer	NNVVCAGCTGBN	1	0	1	9950	0.2133	10696.4	0.2302
Ascl2(bHLH)/ESC-Ascl2-ChIP-Seq(GSE97712)/Homer	SSRGCAGCTGCH	1	0	1	6242	0.1338	7589.4	0.1633
E2A(bHLH)/proBcell-E2A-ChIP-Seq(GSE21978)/Homer	DNRCAGCTGY	1	0	1	7853	0.1683	9950.5	0.2141
E2A(bHLH),near_PU.1/Bcell-PU.1-ChIP-Seq(GSE21512)/Homer	NVCACCTGBN	1	0	1	5869	0.1258	10378.9	0.2234
HEB(bHLH)/mES-Heb-ChIP-Seq(GSE53233)/Homer	VCAGCTGBNN	1	0	1	11168	0.2394	13115.6	0.2823
Ptf1a(bHLH)/Panc1-Ptf1a-ChIP-Seq(GSE47459)/Homer	ACAGCTGTTN	1	0	1	16744	0.3589	18082.6	0.3892
SCRT1(Zf)/HEK293-SCRT1.eGFP-ChIP-Seq(Encode)/Homer	GCAACAGGTG	1	0	1	1725	0.037	2258.8	0.0486
Slug(Zf)/Mesoderm-Snai2-ChIP-Seq(GSE61475)/Homer	SNGCACCTGCHS	1	0	1	2156	0.0462	4195.2	0.0903
Tbet(T-box)/CD8-Tbet-ChIP-Seq(GSE33802)/Homer	AGGTGTGAAM	1	0	1	8699	0.1864	9901.7	0.2131
Tbx21(T-box)/GM12878-TBX21-ChIP-Seq(Encode)/Homer	AGGTGTGAAA	1	0	1	8319	0.1783	9255.1	0.1992
Tbx5(T-box)/HL1-Tbx5.biotin-ChIP-Seq(GSE21529)/Homer	AGGTGTCA	1	0	1	20574	0.441	23125.1	0.4977
Tbx6(T-box)/ESC-Tbx6-ChIP-Seq(GSE93524)/Homer	DAGGTGTBAA	1	0	1	7509	0.1609	9162.1	0.1972
ZEB1(Zf)/PDAC-ZEB1-ChIP-Seq(GSE64557)/Homer	VCAGGTRDRY	1	0	1	7225	0.1549	12952.7	0.2788
ZEB2(Zf)/SNU398-ZEB2-ChIP-Seq(GSE103048)/Homer	GNMCAGGTGTGC	1	0	1	3684	0.079	6974.3	0.1501
Zelda(Zf)/Embryo-zld-ChIP-Seq(GSE65441)/Homer	KBCTACCTGW	1	0	1	2050	0.0439	3852.9	0.0829
MYB41(MYB)/col-MYB41-DAP-Seq(GSE60143)/Homer	BYTYACCTAA	1	0	1	2421	0.0519	3024.5	0.0651
MYB4(MYB)/col200-MYB4-DAP-Seq(GSE60143)/Homer	WAGKTAGGTARR	1	0	1	5292	0.1134	5963.8	0.1283
NGA4(ABI3VP1)/col-NGA4-DAP-Seq(GSE60143)/Homer	TKNTCAGGTG	1	0	1	14532	0.3115	19103.1	0.4111

## Sheet: Homer_Dog-IrisMel-vs-Dog-OralMe
Complete output from Homer on differential regions in the dog line Dog-IrisMel-14205 versus the dog line Dog-OralMel-18249.
Motif Name	Consensus	P-value	Log P-value	q-value (Benjamini)	# of Target Sequences with Motif(of 54902)	% of Target Sequences with Motif	# of Background Sequences with Motif(of 54851)	% of Background Sequences with Motif
Atf3(bZIP)/GBM-ATF3-ChIP-Seq(GSE33912)/Homer	DATGASTCATHN	1e-9527	-21940	0	27292	0.4971	6988	0.1274
Fra1(bZIP)/BT549-Fra1-ChIP-Seq(GSE46166)/Homer	NNATGASTCATH	1e-9395	-21630	0	25328	0.4613	5985.7	0.1092
BATF(bZIP)/Th17-BATF-ChIP-Seq(GSE39756)/Homer	DATGASTCAT	1e-9104	-20960	0	26600	0.4845	6887	0.1256
JunB(bZIP)/DendriticCells-Junb-ChIP-Seq(GSE36099)/Homer	RATGASTCAT	1e-9063	-20870	0	24392	0.4443	5697.3	0.1039
Fra2(bZIP)/Striatum-Fra2-ChIP-Seq(GSE43429)/Homer	GGATGACTCATC	1e-9001	-20730	0	22707	0.4136	4875.5	0.0889
AP-1(bZIP)/ThioMac-PU.1-ChIP-Seq(GSE21512)/Homer	VTGACTCATC	1e-8968	-20650	0	27929	0.5087	7772	0.1417
Fosl2(bZIP)/3T3L1-Fosl2-ChIP-Seq(GSE56872)/Homer	NATGASTCABNN	1e-7488	-17240	0	16995	0.3095	3063.3	0.0559
Jun-AP1(bZIP)/K562-cJun-ChIP-Seq(GSE31477)/Homer	GATGASTCATCN	1e-6272	-14440	0	13198	0.2404	2094.4	0.0382
Bach2(bZIP)/OCILy7-Bach2-ChIP-Seq(GSE44420)/Homer	TGCTGAGTCA	1e-2878	-6627	0	8286	0.1509	1786.2	0.0326
TEAD(TEA)/Fibroblast-PU.1-ChIP-Seq(Unpublished)/Homer	YCWGGAATGY	1e-1317	-3033	0	14777	0.2691	7772.7	0.1418
TEAD1(TEAD)/HepG2-TEAD1-ChIP-Seq(Encode)/Homer	CYRCATTCCA	1e-1314	-3026	0	18840	0.3431	11011.9	0.2008
TEAD3(TEA)/HepG2-TEAD3-ChIP-Seq(Encode)/Homer	TRCATTCCAG	1e-1273	-2932	0	20804	0.3789	12768.5	0.2329
TEAD4(TEA)/Tropoblast-Tead4-ChIP-Seq(GSE37350)/Homer	CCWGGAATGY	1e-1213	-2793	0	15795	0.2877	8805.2	0.1606
MafK(bZIP)/C2C12-MafK-ChIP-Seq(GSE36030)/Homer	GCTGASTCAGCA	1e-936	-2157	0	5162	0.094	1815	0.0331
TEAD2(TEA)/Py2T-Tead2-ChIP-Seq(GSE55709)/Homer	CCWGGAATGY	1e-881	-2030	0	10395	0.1893	5441.1	0.0992
NF-E2(bZIP)/K562-NFE2-ChIP-Seq(GSE31477)/Homer	GATGACTCAGCA	1e-819	-1887	0	2380	0.0433	495.9	0.009
Bach1(bZIP)/K562-Bach1-ChIP-Seq(GSE31477)/Homer	AWWNTGCTGAGTCAT	1e-785	-1808	0	2382	0.0434	517.2	0.0094
Nrf2(bZIP)/Lymphoblast-Nrf2-ChIP-Seq(GSE37589)/Homer	HTGCTGAGTCAT	1e-688	-1586	0	1915	0.0349	380.9	0.0069
RUNX1(Runt)/Jurkat-RUNX1-ChIP-Seq(GSE29180)/Homer	AAACCACARM	1e-594	-1369	0	15021	0.2736	10016.4	0.1827
c-Jun-CRE(bZIP)/K562-cJun-ChIP-Seq(GSE31477)/Homer	ATGACGTCATCY	1e-590	-1360	0	5663	0.1031	2664.4	0.0486
RUNX2(Runt)/PCa-RUNX2-ChIP-Seq(GSE33889)/Homer	NWAACCACADNN	1e-573	-1322	0	12609	0.2297	8057.6	0.1469
NFE2L2(bZIP)/HepG2-NFE2L2-ChIP-Seq(Encode)/Homer	AWWWTGCTGAGTCAT	1e-559	-1288	0	2033	0.037	518.2	0.0094
RUNX(Runt)/HPC7-Runx1-ChIP-Seq(GSE22178)/Homer	SAAACCACAG	1e-557	-1283	0Complete output from Homer when comparing differential regions in the dog line Bounty versus the dog line Cesar.	10866	0.1979	6684.4	0.1219
Atf2(bZIP)/3T3L1-Atf2-ChIP-Seq(GSE56872)/Homer	NRRTGACGTCAT	1e-550	-1268	0	5735	0.1045	2794.3	0.051
Atf7(bZIP)/3T3L1-Atf7-ChIP-Seq(GSE56872)/Homer	NGRTGACGTCAY	1e-519	-1197	0	7628	0.1389	4253	0.0776
RUNX-AML(Runt)/CD4+-PolII-ChIP-Seq(Barski_et_al.)/Homer	GCTGTGGTTW	1e-495	-1142	0	10844	0.1975	6873.5	0.1254
MafB(bZIP)/BMM-Mafb-ChIP-Seq(GSE75722)/Homer	WNTGCTGASTCAGCANWTTY	1e-458	-1056	0	6972	0.127	3920.7	0.0715
MafA(bZIP)/Islet-MafA-ChIP-Seq(GSE30298)/Homer	TGCTGACTCA	1e-397	-915.4	0	10943	0.1993	7324.6	0.1336
Atf1(bZIP)/K562-ATF1-ChIP-Seq(GSE31477)/Homer	GATGACGTCA	1e-371	-856.4	0	9686	0.1764	6374.3	0.1162
JunD(bZIP)/K562-JunD-ChIP-Seq/Homer	ATGACGTCATCN	1e-311	-717	0	1748	0.0318	610.5	0.0111
AT2G38300(G2like)/col-AT2G38300-DAP-Seq(GSE60143)/Homer	ADRGAATGTT	1e-266	-614.3	0	23411	0.4264	19420.7	0.3542
AT2G40260(G2like)/colamp-AT2G40260-DAP-Seq(GSE60143)/Homer	WAAAYATTCTTT	1e-264	-609.5	0	26261	0.4783	22201	0.4049
TGA1(bZIP)/colamp-TGA1-DAP-Seq(GSE60143)/Homer	TGACGTCAKC	1e-240	-553.5	0	4981	0.0907	3046	0.0555
NF1(CTF)/LNCAP-NF1-ChIP-Seq(Unpublished)/Homer	CYTGGCABNSTGCCAR	1e-197	-454.3	0	5210	0.0949	3388.5	0.0618
TGA5(bZIP)/col-TGA5-DAP-Seq(GSE60143)/Homer	NNGATGACGTCATCN	1e-195	-450.2	0	1388	0.0253	554.2	0.0101
TGA6(bZIP)/colamp-TGA6-DAP-Seq(GSE60143)/Homer	TGACGTCABC	1e-187	-431.5	0	6284	0.1145	4319.1	0.0788
TGA4(bZIP)/colamp-TGA4-DAP-Seq(GSE60143)/Homer	RTGACGTCAKCW	1e-185	-427.9	0	3574	0.0651	2130.8	0.0389
NFIL3(bZIP)/HepG2-NFIL3-ChIP-Seq(Encode)/Homer	VTTACGTAAYNNNNN	1e-181	-417.6	0	9454	0.1722	7087.1	0.1292
bZIP50(bZIP)/colamp-bZIP50-DAP-Seq(GSE60143)/Homer	GATGACGTCA	1e-179	-414.4	0	10259	0.1869	7810.6	0.1424
KAN2(G2like)/colamp-KAN2-DAP-Seq(GSE60143)/Homer	ATATTCTY	1e-147	-339.5	0	21064	0.3837	18150.1	0.331
NFAT:AP1(RHD,bZIP)/Jurkat-NFATC1-ChIP-Seq(Jolma_et_al.)/Homer	SARTGGAAAAWRTGAGTCAB	1e-145	-335	0	3451	0.0629	2175.6	0.0397
TGA3(bZIP)/colamp-TGA3-DAP-Seq(GSE60143)/Homer	WTGATGACGTCATCW	1e-136	-314.8	0	874	0.0159	329.7	0.006
HLF(bZIP)/HSC-HLF.Flag-ChIP-Seq(GSE69817)/Homer	RTTATGYAAB	1e-125	-287.9	0	11727	0.2136	9539.7	0.174
Atf4(bZIP)/MEF-Atf4-ChIP-Seq(GSE35681)/Homer	MTGATGCAAT	1e-114	-263.8	0	4414	0.0804	3103	0.0566
Pdx1(Homeobox)/Islet-Pdx1-ChIP-Seq(SRA008281)/Homer	YCATYAATCA	1e-111	-256	0	15038	0.2739	12756.5	0.2326
CEBP:AP1(bZIP)/ThioMac-CEBPb-ChIP-Seq(GSE21512)/Homer	DRTGTTGCAA	1e-109	-252.3	0	10383	0.1891	8433.8	0.1538
Chop(bZIP)/MEF-Chop-ChIP-Seq(GSE35681)/Homer	ATTGCATCAT	1e-108	-250.2	0	3662	0.0667	2502.7	0.0456
Smad3(MAD)/NPC-Smad3-ChIP-Seq(GSE36673)/Homer	TWGTCTGV	1e-104	-240.9	0	27409	0.4992	24832.3	0.4529
NF1-halfsite(CTF)/LNCaP-NF1-ChIP-Seq(Unpublished)/Homer	YTGCCAAG	1e-100	-231.7	0	19208	0.3498	16851.5	0.3073
Tlx?(NR)/NPC-H3K4me1-ChIP-Seq(GSE16256)/Homer	CTGGCAGSCTGCCA	1e-99	-228	0	4956	0.0903	3652.3	0.0666
CRC(C2C2YABBY)/col-CRC-DAP-Seq(GSE60143)/Homer	TWATSATA	1e-92	-213	0	19287	0.3513	17023.8	0.3105
TGA10(bZIP)/colamp-TGA10-DAP-Seq(GSE60143)/Homer	ATGACGTC	1e-90	-209.3	0	6615	0.1205	5167.7	0.0942
FEA4(bZIP)/Corn-FEA4-ChIP-Seq(GSE61954)/Homer	TGACGTCACS	1e-89	-207	0	11674	0.2126	9809.7	0.1789
TGA9(bZIP)/colamp-TGA9-DAP-Seq(GSE60143)/Homer	VTGACGTC	1e-89	-206.8	0	13341	0.243	11374	0.2074
Pitx1(Homeobox)/Chicken-Pitx1-ChIP-Seq(GSE38910)/Homer	TAATCCCN	1e-86	-198.3	0	41421	0.7544	39318.1	0.717
CEBP(bZIP)/ThioMac-CEBPb-ChIP-Seq(GSE21512)/Homer	ATTGCGCAAC	1e-80	-184.6	0	8968	0.1633	7394.7	0.1349
PBX2(Homeobox)/K562-PBX2-ChIP-Seq(Encode)/Homer	RTGATTKATRGN	1e-79	-182.9	0	12274	0.2236	10481.1	0.1911
ASHR1(ND)/col-ASHR1-DAP-Seq(GSE60143)/Homer	NTGGTGAN	1e-71	-165.6	0	14767	0.269	12933.3	0.2359
At5g04390(C2H2)/col200-At5g04390-DAP-Seq(GSE60143)/Homer	AGTGANDN	1e-69	-161	0	47819	0.871	46289.5	0.8442
OCT:OCT-short(POU,Homeobox)/NPC-OCT6-ChIP-Seq(GSE43916)/Homer	ATGCATWATGCATRW	1e-67	-155.8	0	11305	0.2059	9702	0.1769
AARE(HLH)/mES-cMyc-ChIP-Seq/Homer	GATTGCATCA	1e-67	-155.8	0	1439	0.0262	878.7	0.016
CRX(Homeobox)/Retina-Crx-ChIP-Seq(GSE20012)/Homer	GCTAATCC	1e-66	-152.6	0	26086	0.4751	24043.7	0.4385
ERG(ETS)/VCaP-ERG-ChIP-Seq(GSE14097)/Homer	ACAGGAAGTG	1e-66	-152	0	17419	0.3173	15559.5	0.2838
CArG(MADS)/PUER-Srf-ChIP-Seq(Sullivan_et_al.)/Homer	CCATATATGGNM	1e-65	-151.4	0	4396	0.0801	3381.3	0.0617
AT1G76870(Trihelix)/col-AT1G76870-DAP-Seq(GSE60143)/Homer	AAAACCRGWW	1e-64	-149.3	0	5396	0.0983	4278.1	0.078
CRE(bZIP)/Promoter/Homer	CSGTGACGTCAC	1e-62	-144.4	0	2122	0.0386	1447.8	0.0264
Sp5(Zf)/mES-Sp5.Flag-ChIP-Seq(GSE72989)/Homer	RGKGGGCGGAGC	1e-62	-143.5	0	6751	0.123	5528.4	0.1008
GSC(Homeobox)/FrogEmbryos-GSC-ChIP-Seq(DRA000576)/Homer	RGGATTAR	1e-61	-142.4	0	15260	0.2779	13537.5	0.2469
Fli1(ETS)/CD8-FLI-ChIP-Seq(GSE20898)/Homer	NRYTTCCGGH	1e-60	-140.1	0	11022	0.2008	9515.7	0.1735
ETS1(ETS)/Jurkat-ETS1-ChIP-Seq(GSE17954)/Homer	ACAGGAAGTG	1e-60	-138.8	0	11301	0.2058	9785.9	0.1785
Zfp281(Zf)/ES-Zfp281-ChIP-Seq(GSE81042)/Homer	CCCCTCCCCCAC	1e-59	-136.4	0	2082	0.0379	1431.8	0.0261
Mef2d(MADS)/Retina-Mef2d-ChIP-Seq(GSE61391)/Homer	GCTATTTTTAGC	1e-57	-132.5	0	3079	0.0561	2286.4	0.0417
Nkx6.1(Homeobox)/Islet-Nkx6.1-ChIP-Seq(GSE40975)/Homer	GKTAATGR	1e-56	-129.7	0	31933	0.5816	30047.3	0.548
Bcl6(Zf)/Liver-Bcl6-ChIP-Seq(GSE31578)/Homer	NNNCTTTCCAGGAAA	1e-55	-127.6	0	17292	0.3149	15590.4	0.2843
TAGL1(MADS)/Tomato-TAGL1-ChIP-Seq(GSE116581)/Homer	CCAAAAATRG	1e-55	-127.6	0	15584	0.2838	13940.1	0.2542
KLF14(Zf)/HEK293-KLF14.GFP-ChIP-Seq(GSE58341)/Homer	RGKGGGCGKGGC	1e-55	-127.1	0	12905	0.235	11374.5	0.2074
Mef2b(MADS)/HEK293-Mef2b.V5-ChIP-Seq(GSE67450)/Homer	GCTATTTTTGGM	1e-54	-126.5	0	11837	0.2156	10361.8	0.189
LIN-39(Homeobox)/cElegans.L3-LIN39-ChIP-Seq(modEncode)/Homer	ATGATTRATG	1e-54	-124.9	0	17759	0.3235	16061.6	0.2929
Tal1	CATCTG	1e-53	-123.6	0	17063	0.3108	15395.4	0.2808
Smad2(MAD)/ES-SMAD2-ChIP-Seq(GSE29422)/Homer	CTGTCTGG	1e-53	-123.2	0	14883	0.2711	13293.7	0.2424
EWS:ERG-fusion(ETS)/CADO_ES1-EWS:ERG-ChIP-Seq(SRA014231)/Homer	ATTTCCTGTN	1e-52	-120.1	0	9885	0.18	8551	0.1559
STZ(C2H2)/colamp-STZ-DAP-Seq(GSE60143)/Homer	HNBTCACT	1e-52	-119.9	0	48144	0.8769	46851.8	0.8544
RIN(MADS)/Tomato-RIN-ChIP-Seq(GSE116581)/Homer	CYAAAAWWGG	1e-51	-119.5	0	16995	0.3095	15357.6	0.2801
Etv2(ETS)/ES-ER71-ChIP-Seq(GSE59402)/Homer	NNAYTTCCTGHN	1e-51	-118.4	0	10504	0.1913	9144.7	0.1668
SeqBias: CA-repeat	CACACACACA	1e-51	-117.7	0	42987	0.7829	41432.6	0.7556
Maz(Zf)/HepG2-Maz-ChIP-Seq(GSE31477)/Homer	GGGGGGGG	1e-50	-117.2	0	11100	0.2022	9715.1	0.1772
bcd(Homeobox)/Embryo-Bcd-ChIP-Seq(GSE86966)/Homer	VNNGGATTADNN	1e-49	-115	0	13891	0.253	12392.8	0.226
LBD18(LOBAS2)/colamp-LBD18-DAP-Seq(GSE60143)/Homer	CKGAWWTTCHGS	1e-49	-113.9	0	26817	0.4884	25048.2	0.4568
AT3G25990(Trihelix)/colamp-AT3G25990-DAP-Seq(GSE60143)/Homer	TTAACCATAG	1e-48	-112.6	0	8913	0.1623	7677.5	0.14
SCL(bHLH)/HPC7-Scl-ChIP-Seq(GSE13511)/Homer	AVCAGCTG	1e-48	-110.8	0	37492	0.6829	35824.7	0.6533
ETV1(ETS)/GIST48-ETV1-ChIP-Seq(GSE22441)/Homer	AACCGGAAGT	1e-47	-110.4	0	13736	0.2502	12273.2	0.2238
RFX(HTH)/K562-RFX3-ChIP-Seq(SRA012198)/Homer	CGGTTGCCATGGCAAC	1e-47	-110.1	0	818	0.0149	469.8	0.0086
ARF2(ARF)/col-ARF2-DAP-Seq(GSE60143)/Homer	TTGTCGGMWN	1e-47	-108.3	0	24883	0.4532	23173.5	0.4226
Smad4(MAD)/ESC-SMAD4-ChIP-Seq(GSE29422)/Homer	VBSYGTCTGG	1e-46	-106.7	0	14581	0.2656	13111.7	0.2391
Mef2c(MADS)/GM12878-Mef2c-ChIP-Seq(GSE32465)/Homer	DCYAAAAATAGM	1e-45	-104.6	0	6568	0.1196	5531.8	0.1009
EWS:FLI1-fusion(ETS)/SK_N_MC-EWS:FLI1-ChIP-Seq(SRA014231)/Homer	VACAGGAAAT	1e-45	-104.3	0	6144	0.1119	5141.2	0.0938
SOC1(MADS)/Seedling-SOC1-ChIP-Seq(GSE45846)/Homer	TWCCAWWTWTGG	1e-44	-103.2	0	5868	0.1069	4892.8	0.0892
Ap4(bHLH)/AML-Tfap4-ChIP-Seq(GSE45738)/Homer	NAHCAGCTGD	1e-44	-102.6	0	12294	0.2239	10942.9	0.1996
At1g25550(G2like)/colamp-At1g25550-DAP-Seq(GSE60143)/Homer	NAGATTCY	1e-44	-102.5	0	15891	0.2894	14406.4	0.2627
LXH9(Homeobox)/Hct116-LXH9.V5-ChIP-Seq(GSE116822)/Homer	NGCTAATTAG	1e-44	-102	0	19344	0.3523	17771.3	0.3241
PAX3:FKHR-fusion(Paired,Homeobox)/Rh4-PAX3:FKHR-ChIP-Seq(GSE19063)/Homer	ACCRTGACTAATTNN	1e-44	-101.6	0	2972	0.0541	2284.3	0.0417
AT1G49560(G2like)/colamp-AT1G49560-DAP-Seq(GSE60143)/Homer	GAWTCTNWDA	1e-43	-100.4	0	18320	0.3337	16783	0.3061
Mef2a(MADS)/HL1-Mef2a.biotin-ChIP-Seq(GSE21529)/Homer	CYAAAAATAG	1e-43	-100.2	0	6335	0.1154	5337.6	0.0973
Rfx2(HTH)/LoVo-RFX2-ChIP-Seq(GSE49402)/Homer	GTTGCCATGGCAACM	1e-43	-100	0	957	0.0174	590.4	0.0108
bZIP:IRF(bZIP,IRF)/Th17-BatF-ChIP-Seq(GSE39756)/Homer	NAGTTTCABTHTGACTNW	1e-42	-98.12	0	6107	0.1112	5136.6	0.0937
TGA2(bZIP)/colamp-TGA2-DAP-Seq(GSE60143)/Homer	ACGTCAYCHH	1e-42	-97.52	0	4522	0.0824	3686.6	0.0672
SPDEF(ETS)/VCaP-SPDEF-ChIP-Seq(SRA014231)/Homer	ASWTCCTGBT	1e-42	-97.51	0	10886	0.1983	9631.7	0.1757
bZIP52(bZIP)/colamp-bZIP52-DAP-Seq(GSE60143)/Homer	NDNHCAGCTGTCANN	1e-41	-95.46	0	15278	0.2783	13864.7	0.2529
Otx2(Homeobox)/EpiLC-Otx2-ChIP-Seq(GSE56098)/Homer	NYTAATCCYB	1e-40	-93.82	0	10156	0.185	8960.3	0.1634
ATHB33(ZFHD)/col-ATHB33-DAP-Seq(GSE60143)/Homer	NGTRATTAAK	1e-40	-92.57	0	18323	0.3337	16847.8	0.3073
ETV4(ETS)/HepG2-ETV4-ChIP-Seq(ENCODE)/Homer	ACCGGAAGTG	1e-39	-90.93	0	10142	0.1847	8965.7	0.1635
AT4G37180(G2like)/col-AT4G37180-DAP-Seq(GSE60143)/Homer	AGAATCTTNN	1e-38	-88.67	0	17632	0.3211	16204.2	0.2955
Pitx1:Ebox(Homeobox,bHLH)/Hindlimb-Pitx1-ChIP-Seq(GSE41591)/Homer	YTAATTRAWWCCAGATGT	1e-38	-88.45	0	3058	0.0557	2404.5	0.0439
GABPA(ETS)/Jurkat-GABPa-ChIP-Seq(GSE17954)/Homer	RACCGGAAGT	1e-38	-88.22	0	8628	0.1571	7547.7	0.1376
Unknown2/Drosophila-Promoters/Homer	CATCMCTA	1e-37	-87.45	0	12970	0.2362	11695.3	0.2133
ZNF711(Zf)/SHSY5Y-ZNF711-ChIP-Seq(GSE20673)/Homer	AGGCCTAG	1e-37	-87.13	0	15212	0.2771	13863.9	0.2528
Hoxb4(Homeobox)/ES-Hoxb4-ChIP-Seq(GSE34014)/Homer	TGATTRATGGCY	1e-37	-86.5	0	2913	0.0531	2282.3	0.0416
MafF(bZIP)/HepG2-MafF-ChIP-Seq(GSE31477)/Homer	HWWGTCAGCAWWTTT	1e-37	-85.97	0	4342	0.0791	3572	0.0651
AT2G31460(REMB3)/col-AT2G31460-DAP-Seq(GSE60143)/Homer	WNWARWDGAAATGAT	1e-36	-85.19	0	5850	0.1065	4962.3	0.0905
Six2(Homeobox)/NephronProgenitor-Six2-ChIP-Seq(GSE39837)/Homer	GWAAYHTGAKMC	1e-36	-84.57	0	12063	0.2197	10844.6	0.1978
Stat3(Stat)/mES-Stat3-ChIP-Seq(GSE11431)/Homer	CTTCCGGGAA	1e-36	-84.07	0	5709	0.104	4837.5	0.0882
GATA(Zf),IR3/iTreg-Gata3-ChIP-Seq(GSE20898)/Homer	NNNNNBAGATAWYATCTVHN	1e-35	-81.93	0	2321	0.0423	1775.6	0.0324
ZFX(Zf)/mES-Zfx-ChIP-Seq(GSE11431)/Homer	AGGCCTRG	1e-35	-81.01	0	11982	0.2182	10792.5	0.1968
Hoxd11(Homeobox)/ChickenMSG-Hoxd11.Flag-ChIP-Seq(GSE86088)/Homer	VGCCATAAAA	1e-34	-80.17	0	28917	0.5267	27431	0.5003
Rbpj1(?)/Panc1-Rbpj1-ChIP-Seq(GSE47459)/Homer	HTTTCCCASG	1e-33	-78.22	0	16644	0.3031	15327.7	0.2795
NFkB-p65(RHD)/GM12787-p65-ChIP-Seq(GSE19485)/Homer	WGGGGATTTCCC	1e-33	-78.21	0	5914	0.1077	5058.8	0.0923
Hoxa13(Homeobox)/ChickenMSG-Hoxa13.Flag-ChIP-Seq(GSE86088)/Homer	CYHATAAAAN	1e-33	-77.97	0	30199	0.55	28734.5	0.524
At3g60580(C2H2)/col-At3g60580-DAP-Seq(GSE60143)/Homer	WTTYTACT	1e-33	-77.84	0	46077	0.8392	44935.8	0.8195
At3g12730(G2like)/colamp-At3g12730-DAP-Seq(GSE60143)/Homer	AAGATTCT	1e-33	-76.6	0	20672	0.3765	19286.2	0.3517
Lhx3(Homeobox)/Neuron-Lhx3-ChIP-Seq(GSE31456)/Homer	ADBTAATTAR	1e-33	-76.36	0	22039	0.4014	20635.2	0.3763
EHF(ETS)/LoVo-EHF-ChIP-Seq(GSE49402)/Homer	AVCAGGAAGT	1e-33	-76.07	0	14558	0.2652	13317.7	0.2429
ZNF416(Zf)/HEK293-ZNF416.GFP-ChIP-Seq(GSE58341)/Homer	WDNCTGGGCA	1e-32	-75.7	0	13135	0.2392	11943.7	0.2178
Hoxd13(Homeobox)/ChickenMSG-Hoxd13.Flag-ChIP-Seq(GSE86088)/Homer	NCYAATAAAA	1e-32	-74.47	0	21366	0.3892	19989.8	0.3646
ELF3(ETS)/PDAC-ELF3-ChIP-Seq(GSE64557)/Homer	ANCAGGAAGT	1e-32	-74.25	0	8695	0.1584	7699.2	0.1404
At3g04030(G2like)/col-At3g04030-DAP-Seq(GSE60143)/Homer	DRGAATCT	1e-32	-74.1	0	14335	0.2611	13117.3	0.2392
X-box(HTH)/NPC-H3K4me1-ChIP-Seq(GSE16256)/Homer	GGTTGCCATGGCAA	1e-31	-72.99	0	1284	0.0234	908.4	0.0166
WT1(Zf)/Kidney-WT1-ChIP-Seq(GSE90016)/Homer	MCTCCCMCRCAB	1e-31	-72.52	0	5264	0.0959	4484.4	0.0818
Rfx6(HTH)/Min6b1-Rfx6.HA-ChIP-Seq(GSE62844)/Homer	TGTTKCCTAGCAACM	1e-31	-71.9	0	10344	0.1884	9288.5	0.1694
MYB101(MYB)/colamp-MYB101-DAP-Seq(GSE60143)/Homer	TAACNRMY	1e-31	-71.7	0	20969	0.3819	19624.8	0.3579
ATHB23(ZFHD)/col-ATHB23-DAP-Seq(GSE60143)/Homer	HTAATTARNN	1e-31	-71.4	0	13269	0.2417	12107.2	0.2208
RAP211(AP2EREBP)/colamp-RAP211-DAP-Seq(GSE60143)/Homer	RGCCGGCYWW	1e-30	-70.6	0	12488	0.2275	11360	0.2072
SVP(MADS)/col-SVP-DAP-Seq(GSE60143)/Homer	ANTTWCCHAATTTGG	1e-30	-70.58	0	8390	0.1528	7434.3	0.1356
KLF3(Zf)/MEF-Klf3-ChIP-Seq(GSE44748)/Homer	NRGCCCCRCCCHBNN	1e-30	-70.23	0	2765	0.0504	2209.1	0.0403
KLF5(Zf)/LoVo-KLF5-ChIP-Seq(GSE49402)/Homer	DGGGYGKGGC	1e-30	-70.17	0	8811	0.1605	7837.6	0.1429
Tgif1(Homeobox)/mES-Tgif1-ChIP-Seq(GSE55404)/Homer	YTGWCADY	1e-30	-69.47	0	31636	0.5762	30259.2	0.5518
Pit1+1bp(Homeobox)/GCrat-Pit1-ChIP-Seq(GSE58009)/Homer	ATGCATAATTCA	1e-30	-69.2	0	5701	0.1038	4909.5	0.0895
GLIS3(Zf)/Thyroid-Glis3.GFP-ChIP-Seq(GSE103297)/Homer	CTCCCTGGGAGGCCN	1e-29	-68.78	0	12595	0.2294	11477.7	0.2093
PAX5(Paired,Homeobox)/GM12878-PAX5-ChIP-Seq(GSE32465)/Homer	GCAGCCAAGCRTGACH	1e-29	-68.3	0	3424	0.0624	2812.8	0.0513
KLF6(Zf)/PDAC-KLF6-ChIP-Seq(GSE64557)/Homer	MKGGGYGTGGCC	1e-29	-67.65	0	7207	0.1313	6333.3	0.1155
AGL63(MADS)/col-AGL63-DAP-Seq(GSE60143)/Homer	TTCCAAWWWTGG	1e-29	-67.52	0	11806	0.215	10726.4	0.1956
ATHB24(ZFHD)/colamp-ATHB24-DAP-Seq(GSE60143)/Homer	TAATTAAS	1e-29	-67.37	0	10885	0.1983	9841.7	0.1795
Bcl11a(Zf)/HSPC-BCL11A-ChIP-Seq(GSE104676)/Homer	TYTGACCASWRG	1e-28	-66.61	0	8173	0.1489	7255.6	0.1323
Gfi1b(Zf)/HPC7-Gfi1b-ChIP-Seq(GSE22178)/Homer	MAATCACTGC	1e-28	-64.57	0	7758	0.1413	6875.9	0.1254
TCF4(bHLH)/SHSY5Y-TCF4-ChIP-Seq(GSE96915)/Homer	SMCATCTGKH	1e-27	-63.78	0	16335	0.2975	15154.3	0.2764
Pax8(Paired,Homeobox)/Thyroid-Pax8-ChIP-Seq(GSE26938)/Homer	GTCATGCHTGRCTGS	1e-27	-62.88	0	2951	0.0537	2406.3	0.0439
ATHB25(ZFHD)/colamp-ATHB25-DAP-Seq(GSE60143)/Homer	TAATTAVB	1e-27	-62.82	0	16422	0.2991	15248.8	0.2781
Elf4(ETS)/BMDM-Elf4-ChIP-Seq(GSE88699)/Homer	ACTTCCKGKT	1e-27	-62.73	0	10364	0.1888	9377.8	0.171
ELF5(ETS)/T47D-ELF5-ChIP-Seq(GSE30407)/Homer	ACVAGGAAGT	1e-27	-62.4	0	8307	0.1513	7412	0.1352
Ets1-distal(ETS)/CD4+-PolII-ChIP-Seq(Barski_et_al.)/Homer	MACAGGAAGT	1e-27	-62.31	0	3538	0.0644	2943.6	0.0537
Nanog(Homeobox)/mES-Nanog-ChIP-Seq(GSE11724)/Homer	RGCCATTAAC	1e-27	-62.27	0	39942	0.7275	38742	0.7065
PU.1(ETS)/ThioMac-PU.1-ChIP-Seq(GSE21512)/Homer	AGAGGAAGTG	1e-26	-61.44	0	5626	0.1025	4884.6	0.0891
Rfx1(HTH)/NPC-H3K4me1-ChIP-Seq(GSE16256)/Homer	KGTTGCCATGGCAA	1e-26	-60.78	0	2088	0.038	1640.6	0.0299
SEP3(MADS)/Arabidoposis-Flower-Sep3-ChIP-Seq/Homer	CCAAAAAGGG	1e-26	-60.67	0	15884	0.2893	14744	0.2689
Bapx1(Homeobox)/VertebralCol-Bapx1-ChIP-Seq(GSE36672)/Homer	TTRAGTGSYK	1e-26	-60.41	0	21890	0.3987	20645.7	0.3765
PSE(SNAPc)/K562-mStart-Seq/Homer	WAVTCACCMTAASYDAAAAG	1e-26	-59.95	0	6815	0.1241	6013.6	0.1097
Lhx2(Homeobox)/HFSC-Lhx2-ChIP-Seq(GSE48068)/Homer	TAATTAGN	1e-25	-59.81	0	15120	0.2754	14006.7	0.2554
Stat3+il21(Stat)/CD4-Stat3-ChIP-Seq(GSE19198)/Homer	SVYTTCCNGGAARB	1e-25	-59.66	0	8072	0.147	7208.3	0.1315
Tgif2(Homeobox)/mES-Tgif2-ChIP-Seq(GSE55404)/Homer	TGTCANYT	1e-25	-59.32	0	33032	0.6016	31769.8	0.5794
ATHB6(Homeobox)/col-ATHB6-DAP-Seq(GSE60143)/Homer	AATGATTG	1e-25	-59.01	0	17994	0.3277	16824.1	0.3068
AZF1(C2H2)/colamp-AZF1-DAP-Seq(GSE60143)/Homer	DKSWCACT	1e-25	-58.7	0	44658	0.8134	43617.5	0.7955
Hoxa11(Homeobox)/ChickenMSG-Hoxa11.Flag-ChIP-Seq(GSE86088)/Homer	TTTTATGGCM	1e-24	-56.67	0	28070	0.5113	26824.9	0.4892
ANAC038(NAC)/col-ANAC038-DAP-Seq(GSE60143)/Homer	ACACGTWAYC	1e-24	-56.09	0	20638	0.3759	19455.1	0.3548
ATHB34(ZFHD)/colamp-ATHB34-DAP-Seq(GSE60143)/Homer	TRATTARS	1e-24	-56.07	0	11496	0.2094	10523.6	0.1919
MYB33(MYB)/col-MYB33-DAP-Seq(GSE60143)/Homer	DDTYNGTTAN	1e-24	-55.66	0	20908	0.3808	19726.7	0.3598
Elk1(ETS)/Hela-Elk1-ChIP-Seq(GSE31477)/Homer	HACTTCCGGY	1e-23	-54.84	0	4123	0.0751	3520.3	0.0642
AT5G25475(ABI3VP1)/col-AT5G25475-DAP-Seq(GSE60143)/Homer	RNNRNCAAGCADNDB	1e-23	-54.5	0	12528	0.2282	11536.8	0.2104
Sp2(Zf)/HEK293-Sp2.eGFP-ChIP-Seq(Encode)/Homer	YGGCCCCGCCCC	1e-23	-53.99	0	10390	0.1892	9474.1	0.1728
BHLHA15(bHLH)/NIH3T3-BHLHB8.HA-ChIP-Seq(GSE119782)/Homer	NAMCAGCTGK	1e-23	-53.67	0	14616	0.2662	13574	0.2475
MYB(HTH)/ERMYB-Myb-ChIPSeq(GSE22095)/Homer	GGCVGTTR	1e-23	-53.2	0	17568	0.32	16466.4	0.3003
WRKY75(WRKY)/col-WRKY75-DAP-Seq(GSE60143)/Homer	CGTTGACTWW	1e-23	-53.19	0	10034	0.1828	9138.9	0.1667
Hoxc9(Homeobox)/Ainv15-Hoxc9-ChIP-Seq(GSE21812)/Homer	GGCCATAAATCA	1e-23	-53.18	0	7333	0.1336	6552.6	0.1195
Six1(Homeobox)/Myoblast-Six1-ChIP-Chip(GSE20150)/Homer	GKVTCADRTTWC	1e-22	-52.95	0	3211	0.0585	2688	0.049
SFP1/SacCer-Promoters/Homer	DDAAAAATTTTY	1e-22	-52.94	0	1777	0.0324	1392.1	0.0254
MyoD(bHLH)/Myotube-MyoD-ChIP-Seq(GSE21614)/Homer	RRCAGCTGYTSY	1e-22	-52.47	0	6931	0.1262	6175.6	0.1126
Twist2(bHLH)/Myoblast-Twist2.Ty1-ChIP-Seq(GSE127998)/Homer	MCAGCTGBYH	1e-22	-51.72	0	17773	0.3237	16683.1	0.3043
LBD19(LOBAS2)/colamp-LBD19-DAP-Seq(GSE60143)/Homer	CCKGAAWTTCMGGAW	1e-22	-51.49	0	18968	0.3455	17860.7	0.3257
NeuroG2(bHLH)/Fibroblast-NeuroG2-ChIP-Seq(GSE75910)/Homer	ACCATCTGTT	1e-22	-51.14	0	16595	0.3023	15534.8	0.2833
WRKY15(WRKY)/col-WRKY15-DAP-Seq(GSE60143)/Homer	VGTTGACTWW	1e-22	-51.06	0	10238	0.1865	9353.5	0.1706
NFkB-p65-Rel(RHD)/ThioMac-LPS-Expression(GSE23622)/Homer	GGAAATTCCC	1e-22	-50.97	0	810	0.0148	563.6	0.0103
EKLF(Zf)/Erythrocyte-Klf1-ChIP-Seq(GSE20478)/Homer	NWGGGTGTGGCY	1e-22	-50.86	0	1540	0.028	1190.8	0.0217
Tcf21(bHLH)/ArterySmoothMuscle-Tcf21-ChIP-Seq(GSE61369)/Homer	NAACAGCTGG	1e-22	-50.81	0	9593	0.1747	8734.2	0.1593
WRKY31(WRKY)/colamp-WRKY31-DAP-Seq(GSE60143)/Homer	NCGTTGACTWWK	1e-21	-50.51	0	7549	0.1375	6778	0.1236
Klf4(Zf)/mES-Klf4-ChIP-Seq(GSE11431)/Homer	GCCACACCCA	1e-21	-50.27	0	2376	0.0433	1939.3	0.0354
Rfx5(HTH)/GM12878-Rfx5-ChIP-Seq(GSE31477)/Homer	SCCTAGCAACAG	1e-21	-49.6	0	3009	0.0548	2519.7	0.046
HOXB13(Homeobox)/ProstateTumor-HOXB13-ChIP-Seq(GSE56288)/Homer	TTTTATKRGG	1e-21	-49.27	0	13873	0.2527	12894.2	0.2352
WRKY42(WRKY)/colamp-WRKY42-DAP-Seq(GSE60143)/Homer	NAAAGTCAACGN	1e-21	-49.16	0	3521	0.0641	2993.6	0.0546
WRKY33(WRKY)/col-WRKY33-DAP-Seq(GSE60143)/Homer	CGTTGACYAW	1e-21	-48.94	0	7983	0.1454	7205.1	0.1314
PAX6(Paired,Homeobox)/Forebrain-Pax6-ChIP-Seq(GSE66961)/Homer	NGTGTTCAVTSAAGCGKAAA	1e-20	-48.24	0	1152	0.021	860.5	0.0157
Klf9(Zf)/GBM-Klf9-ChIP-Seq(GSE62211)/Homer	GCCACRCCCACY	1e-20	-47.36	0	2140	0.039	1738.8	0.0317
Egr1(Zf)/K562-Egr1-ChIP-Seq(GSE32465)/Homer	TGCGTGGGYG	1e-20	-47.04	0	5093	0.0928	4474.3	0.0816
BOS1(MYB)/col-BOS1-DAP-Seq(GSE60143)/Homer	NNRCCTAACT	1e-20	-46.79	0	9384	0.1709	8568.9	0.1563
AGL15(MADS)/col-AGL15-DAP-Seq(GSE60143)/Homer	TTTCCHWATWDGGAA	1e-20	-46.76	0	2512	0.0458	2078.4	0.0379
AGL6(MADS)/col-AGL6-DAP-Seq(GSE60143)/Homer	TTWCCWWAWWDGGWA	1e-20	-46.46	0	2086	0.038	1693.7	0.0309
STAT4(Stat)/CD4-Stat4-ChIP-Seq(GSE22104)/Homer	NYTTCCWGGAAR	1e-19	-45.45	0	12161	0.2215	11267.5	0.2055
Atoh1(bHLH)/Cerebellum-Atoh1-ChIP-Seq(GSE22111)/Homer	VNRVCAGCTGGY	1e-19	-44.96	0	11378	0.2072	10512.9	0.1917
AMYB(HTH)/Testes-AMYB-ChIP-Seq(GSE44588)/Homer	TGGCAGTTGG	1e-19	-44.72	0	15567	0.2835	14597.8	0.2662
BMYB(HTH)/Hela-BMYB-ChIP-Seq(GSE27030)/Homer	NHAACBGYYV	1e-19	-44.49	0	15544	0.2831	14577.5	0.2659
WRKY6(WRKY)/colamp-WRKY6-DAP-Seq(GSE60143)/Homer	NCGTTGACTWWD	1e-18	-43.68	0	9085	0.1655	8308.8	0.1515
AT5G60130(ABI3VP1)/col-AT5G60130-DAP-Seq(GSE60143)/Homer	WTTYTAAGVAAA	1e-18	-43.25	0	25558	0.4655	24481.9	0.4465
Srebp1a(bHLH)/HepG2-Srebp1a-ChIP-Seq(GSE31477)/Homer	RTCACSCCAY	1e-18	-42.19	0	2231	0.0406	1843.1	0.0336
AGL25(MADS)/colamp-AGL25-DAP-Seq(GSE60143)/Homer	TTTCCATWTWTGGAA	1e-18	-42.15	0	1055	0.0192	794.5	0.0145
WRKY18(WRKY)/col-WRKY18-DAP-Seq(GSE60143)/Homer	NNNTTGACYWNNNNN	1e-17	-41.39	0	16596	0.3023	15644.6	0.2853
STAT6(Stat)/Macrophage-Stat6-ChIP-Seq(GSE38377)/Homer	TTCCKNAGAA	1e-17	-41.16	0	7800	0.1421	7095.6	0.1294
ANAC046(NAC)/colamp-ANAC046-DAP-Seq(GSE60143)/Homer	ACACGYWAYC	1e-17	-41.12	0	18610	0.339	17628.4	0.3215
WRKY65(WRKY)/colamp-WRKY65-DAP-Seq(GSE60143)/Homer	AWWWAGTCAACG	1e-17	-41.01	0	5480	0.0998	4882.5	0.089
NFAT(RHD)/Jurkat-NFATC1-ChIP-Seq(Jolma_et_al.)/Homer	ATTTTCCATT	1e-17	-40.87	0	12069	0.2198	11225.3	0.2047
HuR(?)/HEK293-HuR-CLIP-Seq(GSE87887)/Homer	BTTTGGTTTG	1e-17	-40.33	0	38092	0.6938	37102.8	0.6766
Isl1(Homeobox)/Neuron-Isl1-ChIP-Seq(GSE31456)/Homer	CTAATKGV	1e-17	-40.31	0	23123	0.4212	22100.3	0.403
MITF(bHLH)/MastCells-MITF-ChIP-Seq(GSE48085)/Homer	RTCATGTGAC	1e-17	-40.25	0	9310	0.1696	8557.9	0.1561
Foxh1(Forkhead)/hESC-FOXH1-ChIP-Seq(GSE29422)/Homer	NNTGTGGATTSS	1e-17	-39.69	0	7551	0.1375	6869.5	0.1253
Elk4(ETS)/Hela-Elk4-ChIP-Seq(GSE31477)/Homer	NRYTTCCGGY	1e-17	-39.58	0	4090	0.0745	3580.9	0.0653
ETS(ETS)/Promoter/Homer	AACCGGAAGT	1e-17	-39.42	0	2371	0.0432	1984.8	0.0362
WRKY55(WRKY)/col-WRKY55-DAP-Seq(GSE60143)/Homer	NCGTTGACTT	1e-17	-39.3	0	11988	0.2183	11163.2	0.2036
WRKY47(WRKY)/colamp-WRKY47-DAP-Seq(GSE60143)/Homer	WAAGTCAACGBT	1e-17	-39.26	0	2678	0.0488	2267.8	0.0414
WRKY71(WRKY)/col-WRKY71-DAP-Seq(GSE60143)/Homer	CKTTGACYWW	1e-16	-39.12	0	8114	0.1478	7415.4	0.1352
Nkx3.1(Homeobox)/LNCaP-Nkx3.1-ChIP-Seq(GSE28264)/Homer	AAGCACTTAA	1e-16	-39.05	0	23593	0.4297	22583.5	0.4119
TOD6?/SacCer-Promoters/Homer	GCGATGAGMT	1e-16	-38.73	0	1856	0.0338	1518.8	0.0277
MYB73(MYB)/col-MYB73-DAP-Seq(GSE60143)/Homer	NNNNHAACNGHHDHN	1e-16	-38.44	0	21943	0.3997	20955.2	0.3822
CDX4(Homeobox)/ZebrafishEmbryos-Cdx4.Myc-ChIP-Seq(GSE48254)/Homer	NGYCATAAAWCH	1e-16	-38.2	0	12027	0.2191	11213.4	0.2045
NF1:FOXA1(CTF,Forkhead)/LNCAP-FOXA1-ChIP-Seq(GSE27824)/Homer	WNTGTTTRYTTTGGCA	1e-16	-38.18	0	772	0.0141	563	0.0103
AGL16(MADS)/col-AGL16-DAP-Seq(GSE60143)/Homer	TWCCHWATWDGGAAA	1e-16	-38	0	1534	0.0279	1231.4	0.0225
OBP3(C2C2dof)/col-OBP3-DAP-Seq(GSE60143)/Homer	NYWACTTTTT	1e-16	-37.87	0	34833	0.6344	33841.1	0.6172
ZNF467(Zf)/HEK293-ZNF467.GFP-ChIP-Seq(GSE58341)/Homer	TGGGGAAGGGCM	1e-16	-37.87	0	8400	0.153	7702.4	0.1405
WRKY25(WRKY)/colamp-WRKY25-DAP-Seq(GSE60143)/Homer	NNNNHRGTCAAMNNN	1e-16	-37.13	0	11869	0.2162	11071.5	0.2019
ELF1(ETS)/Jurkat-ELF1-ChIP-Seq(SRA014231)/Homer	AVCCGGAAGT	1e-16	-36.95	0	3640	0.0663	3175.1	0.0579
MYB116(MYB)/colamp-MYB116-DAP-Seq(GSE60143)/Homer	AGTTAGGCAN	1e-15	-35.96	0	7598	0.1384	6949	0.1267
WRKY28(WRKY)/col-WRKY28-DAP-Seq(GSE60143)/Homer	BGTTGACTWH	1e-15	-35.5	0	13416	0.2444	12599.6	0.2298
MYB65(MYB)/colamp-MYB65-DAP-Seq(GSE60143)/Homer	RACNGTTA	1e-15	-35.48	0	12491	0.2275	11697	0.2133
Replumless(BLH)/Arabidopsis-RPL.GFP-ChIP-Seq(GSE78727)/Homer	HGTCWHATCA	1e-15	-35.34	0	13023	0.2372	12217.4	0.2228
RBFox2(?)/Heart-RBFox2-CLIP-Seq(GSE57926)/Homer	TGCATGCA	1e-15	-35.13	0	21324	0.3884	20387.8	0.3718
SeqBias: GA-repeat	GAGAGAGAGA	1e-15	-35	0	49158	0.8953	48504.8	0.8846
Hoxa10(Homeobox)/ChickenMSG-Hoxa10.Flag-ChIP-Seq(GSE86088)/Homer	GGYAATGAAA	1e-15	-34.95	0	8155	0.1485	7494	0.1367
OCT:OCT(POU,Homeobox,IR1)/NPC-Brn2-ChIP-Seq(GSE35496)/Homer	ATGAATWATTCATGA	1e-15	-34.63	0	337	0.0061	211.7	0.0039
ZBTB18(Zf)/HEK293-ZBTB18.GFP-ChIP-Seq(GSE58341)/Homer	AACATCTGGA	1e-14	-34.42	0	5339	0.0972	4799	0.0875
STAT5(Stat)/mCD4+-Stat5-ChIP-Seq(GSE12346)/Homer	RTTTCTNAGAAA	1e-14	-33.76	0	4546	0.0828	4051.8	0.0739
STAT6(Stat)/CD4-Stat6-ChIP-Seq(GSE22104)/Homer	ABTTCYYRRGAA	1e-14	-33.73	0	7931	0.1445	7290.9	0.133
RORgt(NR)/EL4-RORgt.Flag-ChIP-Seq(GSE56019)/Homer	AAYTAGGTCA	1e-14	-33.49	0	1752	0.0319	1447.1	0.0264
RORgt(NR)/EL4-RORgt.Flag-ChIP-Seq(GSE56019)/Homer	AAYTAGGTCA	1e-14	-33.49	0	1752	0.0319	1447.1	0.0264
Unknown-ESC-element(?)/mES-Nanog-ChIP-Seq(GSE11724)/Homer	CACAGCAGGGGG	1e-14	-33.41	0	5758	0.1049	5207.4	0.095
Reverb(NR),DR2/RAW-Reverba.biotin-ChIP-Seq(GSE45914)/Homer	GTRGGTCASTGGGTCA	1e-14	-33.26	0	1457	0.0265	1181.4	0.0215
EBF(EBF)/proBcell-EBF-ChIP-Seq(GSE21978)/Homer	DGTCCCYRGGGA	1e-14	-33.25	0	2408	0.0439	2050.9	0.0374
ZNF519(Zf)/HEK293-ZNF519.GFP-ChIP-Seq(GSE58341)/Homer	GAGSCCGAGC	1e-14	-33.16	0	1627	0.0296	1335.8	0.0244
STAT1(Stat)/HelaS3-STAT1-ChIP-Seq(GSE12782)/Homer	NATTTCCNGGAAAT	1e-14	-33	0	3934	0.0717	3478.7	0.0634
EBF2(EBF)/BrownAdipose-EBF2-ChIP-Seq(GSE97114)/Homer	NABTCCCWDGGGAVH	1e-14	-32.33	0	10322	0.188	9620.5	0.1754
bZIP18(bZIP)/colamp-bZIP18-DAP-Seq(GSE60143)/Homer	KGMCAGCTND	1e-13	-31.9	0	41538	0.7566	40710.8	0.7424
AtGRF6(GRF)/col-AtGRF6-DAP-Seq(GSE60143)/Homer	NTGTCAGADNNNNNN	1e-13	-31.9	0	12485	0.2274	11733.2	0.214
ATAF1(NAC)/col-ATAF1-DAP-Seq(GSE60143)/Homer	YACGTMAY	1e-13	-31.8	0	15172	0.2763	14366.6	0.262
MYB98(MYB)/col-MYB98-DAP-Seq(GSE60143)/Homer	NWDCCGTTAC	1e-13	-31.01	0	2512	0.0458	2159.5	0.0394
Initiator/Drosophila-Promoters/Homer	NTCAGTYG	1e-13	-30.92	0	24306	0.4427	23408	0.4269
ATY13(MYB)/col-ATY13-DAP-Seq(GSE60143)/Homer	YYYAACYRHH	1e-13	-30.85	0	30789	0.5608	29879.6	0.5449
GATA3(Zf)/iTreg-Gata3-ChIP-Seq(GSE20898)/Homer	AGATAASR	1e-13	-30.58	0	18154	0.3306	17318.3	0.3158
ATHB6(Homeobox)/Arabidopsis-HB6-ChIP-Seq(GSE80564)/Homer	CAATNATTBN	1e-13	-30.24	0	11169	0.2034	10469.5	0.1909
PHV(HB)/col-PHV-DAP-Seq(GSE60143)/Homer	RTAATSATTA	1e-13	-30.13	0	6088	0.1109	5552.6	0.1013
TRPS1(Zf)/MCF7-TRPS1-ChIP-Seq(GSE107013)/Homer	AGATAAGANN	1e-13	-29.96	0	23921	0.4357	23039.5	0.4202
WRKY29(WRKY)/colamp-WRKY29-DAP-Seq(GSE60143)/Homer	MGTTGACTTT	1e-12	-29.67	0	10886	0.1983	10200.8	0.186
IRF:BATF(IRF:bZIP)/pDC-Irf8-ChIP-Seq(GSE66899)/Homer	CTTTCANTATGACTV	1e-12	-29.67	0	1837	0.0335	1543.8	0.0282
MYB81(MYB)/col-MYB81-DAP-Seq(GSE60143)/Homer	NWAACSGWTWNN	1e-12	-29.39	0	16747	0.305	15948.6	0.2909
Myf5(bHLH)/GM-Myf5-ChIP-Seq(GSE24852)/Homer	BAACAGCTGT	1e-12	-29.32	0	6509	0.1186	5964.7	0.1088
MYB105(MYB)/colamp-MYB105-DAP-Seq(GSE60143)/Homer	RATWCCGTTA	1e-12	-29.25	0	7065	0.1287	6500.3	0.1185
AT5G45580(G2like)/colamp-AT5G45580-DAP-Seq(GSE60143)/Homer	ADRGAATCTH	1e-12	-29	0	21457	0.3908	20608.3	0.3758
WRKY14(WRKY)/colamp-WRKY14-DAP-Seq(GSE60143)/Homer	NCGTTGACTTTN	1e-12	-28.89	0	5546	0.101	5044.8	0.092
MYB77(MYB)/col-MYB77-DAP-Seq(GSE60143)/Homer	NYAACBGYMC	1e-12	-28.69	0	12837	0.2338	12118.8	0.221
Zfp809(Zf)/ES-Zfp809-ChIP-Seq(GSE70799)/Homer	GGGGCTYGKCTGGGA	1e-12	-28.56	0	1796	0.0327	1511.4	0.0276
HY5(bZIP)/colamp-HY5-DAP-Seq(GSE60143)/Homer	RRTSACGTSD	1e-12	-28.52	0	5485	0.0999	4989.7	0.091
caudal(Homeobox)/Drosophila-Embryos-ChIP-Chip(modEncode)/Homer	GGYCATAAAW	1e-12	-28.37	0	10687	0.1946	10022.4	0.1828
HOXA9(Homeobox)/HSC-Hoxa9-ChIP-Seq(GSE33509)/Homer	GGCCATAAATCA	1e-12	-28.24	0	9367	0.1706	8739.4	0.1594
ASL18(LOBAS2)/colamp-ASL18-DAP-Seq(GSE60143)/Homer	CCGGAAAWTCMGGAR	1e-12	-28.08	0	14883	0.2711	14134	0.2578
AGL13(MADS)/col-AGL13-DAP-Seq(GSE60143)/Homer	TWCCAWWTWTGGWAA	1e-12	-27.9	0	843	0.0154	654.8	0.0119
TATA-Box(TBP)/Promoter/Homer	CCTTTTAWAGSC	1e-12	-27.75	0	15634	0.2848	14876.2	0.2713
ZNF322(Zf)/HEK293-ZNF322.GFP-ChIP-Seq(GSE58341)/Homer	GAGCCTGGTACTGWGCCTGR	1e-11	-27.44	0	2580	0.047	2244.9	0.0409
Hoxd10(Homeobox)/ChickenMSG-Hoxd10.Flag-ChIP-Seq(GSE86088)/Homer	GGCMATGAAA	1e-11	-27.14	0	15017	0.2735	14278.1	0.2604
Olig2(bHLH)/Neuron-Olig2-ChIP-Seq(GSE30882)/Homer	RCCATMTGTT	1e-11	-27.01	0	20590	0.375	19781	0.3607
Unknown(Homeobox)/Limb-p300-ChIP-Seq/Homer	SSCMATWAAA	1e-11	-26.65	0	8629	0.1572	8041.9	0.1467
Six4(Homeobox)/MCF7-SIX4-ChIP-Seq(Encode)/Homer	TGWAAYCTGABACCB	1e-11	-26.42	0	651	0.0119	491.1	0.009
REM19(REM)/colamp-REM19-DAP-Seq(GSE60143)/Homer	AAAAAAAA	1e-11	-25.87	0	11662	0.2124	11006.2	0.2007
TF3A(C2H2)/col-TF3A-DAP-Seq(GSE60143)/Homer	NNDDGAGGAGGWNNN	1e-11	-25.4	0	14925	0.2718	14213.9	0.2592
bZIP3(bZIP)/col-bZIP3-DAP-Seq(GSE60143)/Homer	DWKNHSACGTGGCAD	1e-11	-25.38	0	4443	0.0809	4021.1	0.0733
Arnt:Ahr(bHLH)/MCF7-Arnt-ChIP-Seq(Lo_et_al.)/Homer	TBGCACGCAA	1e-10	-24.9	0	4881	0.0889	4444.6	0.0811
WRKY24(WRKY)/colamp-WRKY24-DAP-Seq(GSE60143)/Homer	CGTTGACTWW	1e-10	-24.85	0	8857	0.1613	8284.1	0.1511
AT5G23930(mTERF)/col-AT5G23930-DAP-Seq(GSE60143)/Homer	GGCGGCTG	1e-10	-24.79	0	9028	0.1644	8451.8	0.1541
HSF3(HSF)/colamp-HSF3-DAP-Seq(GSE60143)/Homer	NTTCTAGAAKCTTCT	1e-10	-24.75	0	13257	0.2415	12584.5	0.2295
COUP-TFII(NR)/K562-NR2F1-ChIP-Seq(Encode)/Homer	GKBCARAGGTCA	1e-10	-24.39	0	14334	0.2611	13647.1	0.2489
WRKY30(WRKY)/colamp-WRKY30-DAP-Seq(GSE60143)/Homer	CGTTGACTTN	1e-10	-24.32	0	2754	0.0502	2428.4	0.0443
HOXD13(Homeobox)/Chicken-Hoxd13-ChIP-Seq(GSE38910)/Homer	NCYAATAAAA	1e-10	-24.16	0	14785	0.2693	14094.5	0.257
MYB88(MYB)/col-MYB88-DAP-Seq(GSE60143)/Homer	HNACGCTCCT	1e-10	-23.97	0	11665	0.2125	11035.1	0.2012
VRN1(ABI3VP1)/col-VRN1-DAP-Seq(GSE60143)/Homer	TTTTTTTTTT	1e-10	-23.81	0	4199	0.0765	3802.6	0.0693
AT3G42860(zfGRF)/col-AT3G42860-DAP-Seq(GSE60143)/Homer	CGTTGACTTN	1e-10	-23.66	0	2564	0.0467	2254.4	0.0411
WRKY43(WRKY)/colamp-WRKY43-DAP-Seq(GSE60143)/Homer	NCGTTGACTTTT	1e-10	-23.58	0	3878	0.0706	3499	0.0638
Zic(Zf)/Cerebellum-ZIC1.2-ChIP-Seq(GSE60731)/Homer	CCTGCTGAGH	1e-10	-23.19	0	7886	0.1436	7361.8	0.1343
Adof1(C2C2dof)/col-Adof1-DAP-Seq(GSE60143)/Homer	NRWAAAGYDV	1e-09	-22.91	0	32340	0.589	31565.2	0.5757
GRF9(GRF)/colamp-GRF9-DAP-Seq(GSE60143)/Homer	NWCTGACANNNNNNN	1e-09	-22.91	0	11060	0.2014	10458.5	0.1907
NeuroD1(bHLH)/Islet-NeuroD1-ChIP-Seq(GSE30298)/Homer	GCCATCTGTT	1e-09	-22.88	0	8476	0.1544	7938.7	0.1448
MYB56(MYB)/colamp-MYB56-DAP-Seq(GSE60143)/Homer	HTAACGRMHY	1e-09	-22.74	0	8542	0.1556	8004.1	0.146
MYB70(MYB)/col-MYB70-DAP-Seq(GSE60143)/Homer	WTAACNGTTA	1e-09	-22.56	0	17173	0.3128	16473.8	0.3004
bHLH80(bHLH)/col-bHLH80-DAP-Seq(GSE60143)/Homer	NNNNDCAASTTGHNN	1e-09	-21.99	0	9580	0.1745	9025.5	0.1646
At2g01060(G2like)/colamp-At2g01060-DAP-Seq(GSE60143)/Homer	AGATKCBNWW	1e-09	-21.95	0	35496	0.6465	34753.4	0.6338
AT1G47655(C2C2dof)/colamp-AT1G47655-DAP-Seq(GSE60143)/Homer	YHACTTTTTS	1e-09	-21.88	0	37821	0.6889	37098	0.6766
ERF15(AP2EREBP)/colamp-ERF15-DAP-Seq(GSE60143)/Homer	WDHAGCMGCCAT	1e-09	-21.84	0	13283	0.2419	12653.2	0.2308
E2F3(E2F)/MEF-E2F3-ChIP-Seq(GSE71376)/Homer	BTKGGCGGGAAA	1e-09	-21.55	0	3490	0.0636	3146.1	0.0574
PU.1-IRF(ETS:IRF)/Bcell-PU.1-ChIP-Seq(GSE21512)/Homer	MGGAAGTGAAAC	1e-09	-21.2	0	14895	0.2713	14249.8	0.2599
COUP-TFII(NR)/Artia-Nr2f2-ChIP-Seq(GSE46497)/Homer	AGRGGTCA	1e-09	-21.18	0	16412	0.2989	15746	0.2872
Hoxd12(Homeobox)/ChickenMSG-Hoxd12.Flag-ChIP-Seq(GSE86088)/Homer	HDGYAATGAAAN	1e-09	-21.12	0	22513	0.41	21788.9	0.3974
Brn2(POU,Homeobox)/NPC-Brn2-ChIP-Seq(GSE35496)/Homer	ATGAATATTC	1e-09	-21.08	0	1691	0.0308	1455.7	0.0265
CEBP:CEBP(bZIP)/MEF-Chop-ChIP-Seq(GSE35681)/Homer	NTNATGCAAYMNNHTGMAAY	1e-08	-20.62	0	1997	0.0364	1743.1	0.0318
HSFA6B(HSF)/colamp-HSFA6B-DAP-Seq(GSE60143)/Homer	NTTCTAGAANHTTCT	1e-08	-20.49	0	7914	0.1441	7422	0.1354
SUT1?/SacCer-Promoters/Homer	CCCCGCGC	1e-08	-20.33	0	34899	0.6356	34182.5	0.6234
Dlx3(Homeobox)/Kerainocytes-Dlx3-ChIP-Seq(GSE89884)/Homer	NDGTAATTAC	1e-08	-20.3	0	9684	0.1764	9150.1	0.1669
Sp1(Zf)/Promoter/Homer	GGCCCCGCCCCC	1e-08	-20.23	0	733	0.0134	584.7	0.0107
p63(p53)/Keratinocyte-p63-ChIP-Seq(GSE17611)/Homer	NNDRCATGYCYNRRCATGYH	1e-08	-20.11	0	3107	0.0566	2794	0.051
PRDM10(Zf)/HEK293-PRDM10.eGFP-ChIP-Seq(Encode)/Homer	TGGTACATTCCA	1e-08	-19.86	0	6637	0.1209	6190.6	0.1129
Oct4(POU,Homeobox)/mES-Oct4-ChIP-Seq(GSE11431)/Homer	ATTTGCATAW	1e-08	-19.83	0	6081	0.1108	5652.9	0.1031
PLT1(AP2EREBP)/colamp-PLT1-DAP-Seq(GSE60143)/Homer	GCACGAWTYCCGAGG	1e-08	-19.83	0	613	0.0112	479.9	0.0088
AT2G33550(Trihelix)/colamp-AT2G33550-DAP-Seq(GSE60143)/Homer	TTTAAGGGCAYTTTT	1e-08	-19.83	0	26353	0.48	25635.5	0.4675
WRKY3(WRKY)/col-WRKY3-DAP-Seq(GSE60143)/Homer	NCKTTGACYDDN	1e-08	-19.76	0	6449	0.1175	6009.8	0.1096
At3g24120(G2like)/col-At3g24120-DAP-Seq(GSE60143)/Homer	NWWAGMATMW	1e-08	-19.76	0	35971	0.6552	35271.7	0.6433
E2F6(E2F)/Hela-E2F6-ChIP-Seq(GSE31477)/Homer	GGCGGGAARN	1e-08	-19.75	0	2948	0.0537	2646.8	0.0483
ZNF136(Zf)/HEK293-ZNF136.GFP-ChIP-Seq(GSE58341)/Homer	YTKGATAHAGTATTCTWGGTNGGCA	1e-08	-19.71	0	1156	0.0211	969.5	0.0177
DEL2(E2FDP)/col-DEL2-DAP-Seq(GSE60143)/Homer	WTTTCSCGCC	1e-08	-19.71	0	2311	0.0421	2044.2	0.0373
WRKY27(WRKY)/colamp-WRKY27-DAP-Seq(GSE60143)/Homer	NHGTTGACYTWD	1e-08	-19.71	0	9835	0.1791	9306.3	0.1697
PHA-4(Forkhead)/cElegans-Embryos-PHA4-ChIP-Seq(modEncode)/Homer	KTGTTTGC	1e-08	-19.6	0	31174	0.5678	30458	0.5555
PRDM15(Zf)/ESC-Prdm15-ChIP-Seq(GSE73694)/Homer	YCCDNTCCAGGTTTT	1e-08	-19.51	0	10906	0.1986	10357.3	0.1889
KLF10(Zf)/HEK293-KLF10.GFP-ChIP-Seq(GSE58341)/Homer	GGGGGTGTGTCC	1e-08	-19.47	0	4043	0.0736	3693.7	0.0674
Dorsal(RHD)/Embryo-dl-ChIP-Seq(GSE65441)/Homer	GGGAAAAMCCCG	1e-08	-19.47	0	2040	0.0372	1791.7	0.0327
EAR2(NR)/K562-NR2F6-ChIP-Seq(Encode)/Homer	NRBCARRGGTCA	1e-08	-19.32	0	13122	0.239	12535.1	0.2286
GATA(Zf),IR4/iTreg-Gata3-ChIP-Seq(GSE20898)/Homer	NAGATWNBNATCTNN	1e-08	-19.26	0	1245	0.0227	1053.3	0.0192
ZNF143|STAF(Zf)/CUTLL-ZNF143-ChIP-Seq(GSE29600)/Homer	ATTTCCCAGVAKSCY	1e-08	-18.96	0	3227	0.0588	2918.5	0.0532
RORa(NR)/Liver-Rora-ChIP-Seq(GSE101115)/Homer	AAWCTAGGTCARDNN	1e-08	-18.91	0	1831	0.0333	1599.2	0.0292
AT3G12130(C3H)/colamp-AT3G12130-DAP-Seq(GSE60143)/Homer	TMACTTTTTV	1e-08	-18.81	0	28924	0.5268	28222.4	0.5147
GBF3(bZIP)/Arabidopsis-GBF3-ChIP-Seq(GSE80564)/Homer	TGCCACGTSAYC	1e-08	-18.76	0	3898	0.071	3561.7	0.065
At1g68670(G2like)/colamp-At1g68670-DAP-Seq(GSE60143)/Homer	WNWWHNRAAGATTCT	1e-08	-18.76	0	8106	0.1476	7632.3	0.1392
HSF6(HSF)/col-HSF6-DAP-Seq(GSE60143)/Homer	TTYTAGAAGCTTCTA	1e-08	-18.76	0	3245	0.0591	2937.9	0.0536
WRKY22(WRKY)/colamp-WRKY22-DAP-Seq(GSE60143)/Homer	WWAAAGTCAACK	1e-08	-18.61	0	6587	0.12	6157.4	0.1123
SOL1(CPP)/colamp-SOL1-DAP-Seq(GSE60143)/Homer	ATTTAAATHN	1e-08	-18.55	0	20017	0.3646	19359.8	0.3531
Zic3(Zf)/mES-Zic3-ChIP-Seq(GSE37889)/Homer	GGCCYCCTGCTGDGH	1e-07	-18.21	0	5208	0.0949	4827.5	0.088
E-box/Drosophila-Promoters/Homer	AACAGCTGTTHN	1e-07	-18.08	0	2554	0.0465	2286.1	0.0417
Hoxa9(Homeobox)/ChickenMSG-Hoxa9.Flag-ChIP-Seq(GSE86088)/Homer	RGCAATNAAA	1e-07	-18.03	0	30122	0.5486	29436.7	0.5368
OBP1(C2C2dof)/col-OBP1-DAP-Seq(GSE60143)/Homer	NHHACTTTWT	1e-07	-18	0	33532	0.6107	32854.2	0.5992
TCX2(CPP)/colamp-TCX2-DAP-Seq(GSE60143)/Homer	NNWWTTYRAAHN	1e-07	-17.98	0	20136	0.3667	19488.4	0.3554
Tbx20(T-box)/Heart-Tbx20-ChIP-Seq(GSE29636)/Homer	GGTGYTGACAGS	1e-07	-17.91	0	2355	0.0429	2099.2	0.0383
Pit1(Homeobox)/GCrat-Pit1-ChIP-Seq(GSE58009)/Homer	ATGMATATDC	1e-07	-17.83	0	13709	0.2497	13138.9	0.2396
RLR1?/SacCer-Promoters/Homer	WTTTTCYYTTTT	1e-07	-17.79	0	10060	0.1832	9555.3	0.1743
ATHB15(HB)/col-ATHB15-DAP-Seq(GSE60143)/Homer	GYAATSATTA	1e-07	-17.77	0	4780	0.0871	4419.1	0.0806
Fox:Ebox(Forkhead,bHLH)/Panc1-Foxa2-ChIP-Seq(GSE47459)/Homer	NNNVCTGWGYAAACASN	1e-07	-17.68	0	10841	0.1975	10322.9	0.1883
MYB119(MYB)/colamp-MYB119-DAP-Seq(GSE60143)/Homer	YRACCGTTACDD	1e-07	-17.62	0	2626	0.0478	2358.4	0.043
ATHB5(HB)/colamp-ATHB5-DAP-Seq(GSE60143)/Homer	AATGATTG	1e-07	-17.39	0	13628	0.2482	13066.6	0.2383
ERF13(AP2EREBP)/colamp-ERF13-DAP-Seq(GSE60143)/Homer	TYAGCCGCCATT	1e-07	-17.36	0	4826	0.0879	4468	0.0815
PAX5(Paired,Homeobox),condensed/GM12878-PAX5-ChIP-Seq(GSE32465)/Homer	GTCACGCTCSCTGM	1e-07	-17.19	0	951	0.0173	794.2	0.0145
At1g49010(MYBrelated)/col-At1g49010-DAP-Seq(GSE60143)/Homer	RGATAASNTT	1e-07	-17.16	0	21390	0.3896	20749.6	0.3784
WRKY26(WRKY)/colamp-WRKY26-DAP-Seq(GSE60143)/Homer	CGTTGACTWDKN	1e-07	-17.13	0	5195	0.0946	4827.8	0.088
ZNF652/HepG2-ZNF652.Flag-ChIP-Seq(Encode)/Homer	TTAACCCTTTVNKKN	1e-07	-16.97	0	3118	0.0568	2832	0.0516
LCL1(MYBrelated)/colamp-LCL1-DAP-Seq(GSE60143)/Homer	NAAAATATCTWHWWN	1e-07	-16.92	0	2427	0.0442	2176	0.0397
GBF5(bZIP)/colamp-GBF5-DAP-Seq(GSE60143)/Homer	WKNWSACGTGGCAWN	1e-07	-16.8	0	2563	0.0467	2305.3	0.042
Lhx1(Homeobox)/EmbryoCarcinoma-Lhx1-ChIP-Seq(GSE70957)/Homer	NNYTAATTAR	1e-07	-16.79	0	15499	0.2823	14922	0.2721
Foxo1(Forkhead)/RAW-Foxo1-ChIP-Seq(Fan_et_al.)/Homer	CTGTTTAC	1e-07	-16.6	0	19378	0.3529	18764.4	0.3422
ERF105(AP2EREBP)/colamp-ERF105-DAP-Seq(GSE60143)/Homer	TGGCGGCT	1e-07	-16.36	0	5078	0.0925	4723.3	0.0861
At5g62940(C2C2dof)/col-At5g62940-DAP-Seq(GSE60143)/Homer	WHWHHACTTTTT	1e-07	-16.35	0	37518	0.6833	36895	0.6729
MYB57(MYB)/col-MYB57-DAP-Seq(GSE60143)/Homer	TTACCTAACT	1e-07	-16.26	0	5363	0.0977	5000.8	0.0912
SpiB(ETS)/OCILY3-SPIB-ChIP-Seq(GSE56857)/Homer	AAAGRGGAAGTG	1e-06	-15.98	0	2666	0.0486	2410.6	0.044
AT3G57600(AP2EREBP)/col-AT3G57600-DAP-Seq(GSE60143)/Homer	GGCGGTGG	1e-06	-15.94	0	2843	0.0518	2579.2	0.047
AT2G20110(CPP)/colamp-AT2G20110-DAP-Seq(GSE60143)/Homer	ATTYAAATHY	1e-06	-15.87	0	19138	0.3486	18541.9	0.3381
NAP(NAC)/col-NAP-DAP-Seq(GSE60143)/Homer	ARGTTACGTRTN	1e-06	-15.8	0	6016	0.1096	5640	0.1029
AT5G02460(C2C2dof)/col-AT5G02460-DAP-Seq(GSE60143)/Homer	CHCCTTTT	1e-06	-15.61	0	26842	0.4889	26210.8	0.478
Oct2(POU,Homeobox)/Bcell-Oct2-ChIP-Seq(GSE21512)/Homer	ATATGCAAAT	1e-06	-15.6	0	3778	0.0688	3478.1	0.0634
EBF1(EBF)/Near-E2A-ChIP-Seq(GSE21512)/Homer	GTCCCCWGGGGA	1e-06	-15.5	0	10857	0.1977	10374.5	0.1892
SeqBias: CG-repeat	CGCGCGCGCG	1e-06	-15.41	0	4728	0.0861	4396.5	0.0802
MYB118(MYB)/colamp-MYB118-DAP-Seq(GSE60143)/Homer	TAWCCGTTAC	1e-06	-15.39	0	2587	0.0471	2340.6	0.0427
ETS:RUNX(ETS,Runt)/Jurkat-RUNX1-ChIP-Seq(GSE17954)/Homer	RCAGGATGTGGT	1e-06	-15.31	0	837	0.0152	699.2	0.0128
NAM(NAC)/col-NAM-DAP-Seq(GSE60143)/Homer	RGTTRCGTRW	1e-06	-15.19	0	7068	0.1287	6671.2	0.1217
GAGA-repeat/SacCer-Promoters/Homer	CTYTCTYTCTCTCTC	1e-06	-15.17	0	39738	0.7238	39157	0.7141
Erra(NR)/HepG2-Erra-ChIP-Seq(GSE31477)/Homer	CAAAGGTCAG	1e-06	-15.02	0	19616	0.3573	19033.3	0.3471
HIF-1b(HLH)/T47D-HIF1b-ChIP-Seq(GSE59937)/Homer	RTACGTGC	1e-06	-14.98	0	8526	0.1553	8098	0.1477
SeqBias: A/T bias	WWWWWWWWWW	1e-06	-14.94	0	53428	0.9731	53162.6	0.9695
ERE(NR),IR3/MCF7-ERa-ChIP-Seq(Unpublished)/Homer	VAGGTCACNSTGACC	1e-06	-14.86	0	2455	0.0447	2219	0.0405
FXR(NR),IR1/Liver-FXR-ChIP-Seq(Chong_et_al.)/Homer	AGGTCANTGACCTB	1e-06	-14.76	0	3889	0.0708	3594.6	0.0656
p73(p53)/Trachea-p73-ChIP-Seq(PRJNA310161)/Homer	NRRRCAWGTCCDGRCATGYY	1e-06	-14.72	0	407	0.0074	315.7	0.0058
LBD23(LOBAS2)/colamp-LBD23-DAP-Seq(GSE60143)/Homer	GCGNAWWWTNCGCYW	1e-06	-14.71	0	4713	0.0858	4390	0.0801
AT5G63260(C3H)/col-AT5G63260-DAP-Seq(GSE60143)/Homer	RAAAAAGTRA	1e-06	-14.65	0	29008	0.5283	28395.9	0.5179
WRKY20(WRKY)/col-WRKY20-DAP-Seq(GSE60143)/Homer	CKTTGACYWD	1e-06	-14.41	0	7503	0.1367	7107.6	0.1296
p53(p53)/mES-cMyc-ChIP-Seq(GSE11431)/Homer	ACATGCCCGGGCAT	1e-06	-14.38	0	180	0.0033	122.4	0.0022
DAG2(C2C2dof)/col-DAG2-DAP-Seq(GSE60143)/Homer	WWTTHACTTTTT	1e-06	-14.2	0	23288	0.4242	22700.4	0.414
JGL(C2H2)/col-JGL-DAP-Seq(GSE60143)/Homer	ACYTTCAGTT	1e-06	-14.14	0	18750	0.3415	18193.3	0.3318
Unknown6/Drosophila-Promoters/Homer	AATTTTAAAA	1e-06	-14.12	0	13562	0.247	13062.6	0.2382
IRF3(IRF)/BMDM-Irf3-ChIP-Seq(GSE67343)/Homer	AGTTTCAKTTTC	1e-06	-14.06	0	3969	0.0723	3679.5	0.0671
IRF4(IRF)/GM12878-IRF4-ChIP-Seq(GSE32465)/Homer	ACTGAAACCA	1e-06	-13.98	0	4973	0.0906	4651.9	0.0848
CELF2(RRM)/JSL1-CELF2-CLIP-Seq(GSE71264)/Homer	RGTGTCAG	1e-06	-13.98	0	3611	0.0658	3335.7	0.0608
Cdx2(Homeobox)/mES-Cdx2-ChIP-Seq(GSE14586)/Homer	GYMATAAAAH	1e-06	-13.96	0	9444	0.172	9014	0.1644
HAT2(Homeobox)/colamp-HAT2-DAP-Seq(GSE60143)/Homer	CYAATSATTR	1e-06	-13.95	0	11749	0.214	11279	0.2057
WRKY40(WRKY)/colamp-WRKY40-DAP-Seq(GSE60143)/Homer	AHWAGTCAAC	1e-06	-13.95	0	6031	0.1098	5679.4	0.1036
SPCH(bHLH)/Seedling-SPCH-ChIP-Seq(GSE57497)/Homer	WNBCACGTGA	1e-05	-13.78	0	9399	0.1712	8973	0.1636
At5g08750(C3H)/col-At5g08750-DAP-Seq(GSE60143)/Homer	NWDTTGCGGCTR	1e-05	-13.4	0	2461	0.0448	2238.1	0.0408
ERF2(AP2EREBP)/colamp-ERF2-DAP-Seq(GSE60143)/Homer	GGCGGCTG	1e-05	-13.35	0	1635	0.0298	1454.2	0.0265
MYB62(MYB)/colamp-MYB62-DAP-Seq(GSE60143)/Homer	NTACCTAACT	1e-05	-13.13	0	13650	0.2486	13169.1	0.2402
VIP1(bZIP)/col-VIP1-DAP-Seq(GSE60143)/Homer	NTTGACAGCTGTCAN	1e-05	-13.13	0	1929	0.0351	1734	0.0316
RORg(NR)/Liver-Rorc-ChIP-Seq(GSE101115)/Homer	WAABTAGGTCAV	1e-05	-13.04	0	1225	0.0223	1071.9	0.0195
Trl(Zf)/S2-GAGAfactor-ChIP-Seq(GSE40646)/Homer	RGAGAGAG	1e-05	-13.03	0	25580	0.4659	25011.1	0.4561
bZIP44(bZIP)/colamp-bZIP44-DAP-Seq(GSE60143)/Homer	NDTGCCACGTCAGCH	1e-05	-12.9	0	205	0.0037	146.2	0.0027
CHR(?)/Hela-CellCycle-Expression/Homer	SRGTTTCAAA	1e-05	-12.63	0	8794	0.1602	8400.7	0.1532
Oct11(POU,Homeobox)/NCIH1048-POU2F3-ChIP-seq(GSE115123)/Homer	GATTTGCATA	1e-05	-12.6	0	4075	0.0742	3799.1	0.0693
Foxa3(Forkhead)/Liver-Foxa3-ChIP-Seq(GSE77670)/Homer	BSNTGTTTACWYWGN	1e-05	-12.38	0	3916	0.0713	3648.3	0.0665
ZML2(C2C2gata)/col-ZML2-DAP-Seq(GSE60143)/Homer	CATCATCATC	1e-05	-12.35	0	2701	0.0492	2478.1	0.0452
Prop1(Homeobox)/GHFT1-PROP1.biotin-ChIP-Seq(GSE77302)/Homer	NTAATBNAATTA	1e-05	-12.33	0	9297	0.1693	8899.2	0.1623
AT3G09735(S1Falike)/col-AT3G09735-DAP-Seq(GSE60143)/Homer	TTCTAGAANMTTCTA	1e-05	-12.27	0	6220	0.1133	5888.7	0.1074
WUS1(Homeobox)/colamp-WUS1-DAP-Seq(GSE60143)/Homer	CAWTCATTCA	1e-05	-12.2	0	6023	0.1097	5697.2	0.1039
IRF2(IRF)/Erythroblas-IRF2-ChIP-Seq(GSE36985)/Homer	GAAASYGAAASY	1e-05	-12.14	0	1116	0.0203	975.5	0.0178
Tcfcp2l1(CP2)/mES-Tcfcp2l1-ChIP-Seq(GSE11431)/Homer	NRAACCRGTTYRAACCRGYT	1e-05	-12.08	0	1232	0.0224	1084.6	0.0198
MYB96(MYB)/colamp-MYB96-DAP-Seq(GSE60143)/Homer	WGGTRGTTGG	1e-05	-12.04	0	8935	0.1627	8549	0.1559
FoxD3(forkhead)/ZebrafishEmbryo-Foxd3.biotin-ChIP-seq(GSE106676)/Homer	TGTTTAYTTAGC	1e-05	-11.99	0	10062	0.1833	9657.8	0.1761
RAV1(RAV)/colamp-RAV1-DAP-Seq(GSE60143)/Homer	TWWTTTCTGTTG	1e-05	-11.82	0	9098	0.1657	8713.9	0.1589
LHY(Myb)/Seedling-LHY-ChIP-Seq(GSE52175)/Homer	ADAAATATCT	1e-05	-11.78	0	13315	0.2425	12867.5	0.2347
ERF104(AP2EREBP)/col-ERF104-DAP-Seq(GSE60143)/Homer	GGCGGCGG	1e-05	-11.74	0	2735	0.0498	2517.5	0.0459
At3g45610(C2C2dof)/col-At3g45610-DAP-Seq(GSE60143)/Homer	TWACTTTTTS	1e-05	-11.57	0	21052	0.3834	20539.5	0.3746
SeqBias: TA-repeat	TATATATATA	1e-05	-11.55	0	33437	0.609	32904.9	0.6001
MyoG(bHLH)/C2C12-MyoG-ChIP-Seq(GSE36024)/Homer	AACAGCTG	0.0001	-11.44	0	9623	0.1753	9236.6	0.1684
CDF3(C2C2dof)/colamp-CDF3-DAP-Seq(GSE60143)/Homer	AAAAGTRM	0.0001	-11.42	0	22136	0.4032	21621.1	0.3943
EGL-5(Homeobox)/cElegans-L3-EGL5-ChIP-Seq(modEncode)/Homer	ATTTAATGGG	0.0001	-11.39	0	19027	0.3466	18532.5	0.338
AT5G66940(C2C2dof)/col-AT5G66940-DAP-Seq(GSE60143)/Homer	NNHACTTTWT	0.0001	-11.08	0	25704	0.4682	25184.3	0.4593
NPAS(bHLH)/Liver-NPAS-ChIP-Seq(GSE39860)/Homer	NVCACGTG	0.0001	-11.07	0	15239	0.2776	14785.2	0.2696
At4g01280(MYBrelated)/colamp-At4g01280-DAP-Seq(GSE60143)/Homer	AAATATCT	0.0001	-11.05	0	8583	0.1563	8222.5	0.15
dof45(C2C2dof)/col-dof45-DAP-Seq(GSE60143)/Homer	NVAWAAAGTN	0.0001	-11.02	0	31123	0.5669	30600.6	0.5581
Hand2(bHLH)/Mesoderm-Hand2-ChIP-Seq(GSE61475)/Homer	TGACANARRCCAGRC	0.0001	-10.94	0	5245	0.0955	4958	0.0904
AT5G47660(Trihelix)/colamp-AT5G47660-DAP-Seq(GSE60143)/Homer	AWTTTTACCG	0.0001	-10.93	0	18156	0.3307	17679.2	0.3224
EIL4(EIL)/Tomato-EIL4-ChIP-Seq(GSE116581)/Homer	GATTCAWTGAAT	0.0001	-10.86	0	1315	0.024	1171.9	0.0214
AT5G05550(Trihelix)/col-AT5G05550-DAP-Seq(GSE60143)/Homer	HDNHDTCKCCGGMGA	0.0001	-10.79	0	9500	0.173	9128.2	0.1665
AT1G24250(Orphan)/col-AT1G24250-DAP-Seq(GSE60143)/Homer	KTDGTTGGTDGTTGG	0.0001	-10.72	0.0001	3126	0.0569	2905.5	0.053
AtHB32(ZFHD)/col200-AtHB32-DAP-Seq(GSE60143)/Homer	CGAATTAT	0.0001	-10.61	0.0001	16961	0.3089	16502.8	0.301
Znf263(Zf)/K562-Znf263-ChIP-Seq(GSE31477)/Homer	CVGTSCTCCC	0.0001	-10.58	0.0001	16365	0.2981	15912.4	0.2902
p53(p53)/Saos-p53-ChIP-Seq(GSE15780)/Homer	RRCATGYCYRGRCATGYYYN	0.0001	-10.49	0.0001	869	0.0158	755.1	0.0138
p53(p53)/Saos-p53-ChIP-Seq/Homer	RRCATGYCYRGRCATGYYYN	0.0001	-10.49	0.0001	869	0.0158	755.1	0.0138
GAGA-repeat/Arabidopsis-Promoters/Homer	CTCTCTCTCY	0.0001	-10.48	0.0001	12273	0.2235	11867.5	0.2164
bHLH130(bHLH)/col-bHLH130-DAP-Seq(GSE60143)/Homer	GCAACTTG	0.0001	-10.48	0.0001	6822	0.1243	6506.8	0.1187
Unknown4/Drosophila-Promoters/Homer	AAAAATACCRMA	0.0001	-10.45	0.0001	2018	0.0368	1843.8	0.0336
ZNF341(Zf)/EBV-ZNF341-ChIP-Seq(GSE113194)/Homer	GGAACAGCCG	0.0001	-10.15	0.0001	6113	0.1113	5818.6	0.1061
ERF73(AP2EREBP)/col-ERF73-DAP-Seq(GSE60143)/Homer	CCGCCGCC	0.0001	-10.09	0.0001	1632	0.0297	1478.8	0.027
At5g29000(G2like)/col-At5g29000-DAP-Seq(GSE60143)/Homer	RGAATATTCYHH	0.0001	-10.09	0.0001	3716	0.0677	3484.6	0.0635
FRS9(ND)/col-FRS9-DAP-Seq(GSE60143)/Homer	RGAGAGAGAAAG	0.0001	-9.994	0.0001	3155	0.0575	2942.4	0.0537
ERF1(AP2EREBP)/colamp-ERF1-DAP-Seq(GSE60143)/Homer	GGCGGCTR	0.0001	-9.88	0.0001	1465	0.0267	1321.6	0.0241
COG1(C2C2dof)/col-COG1-DAP-Seq(GSE60143)/Homer	DAAAAAGTGA	0.0001	-9.776	0.0001	19589	0.3568	19132.5	0.3489
At1g64620(C2C2dof)/colamp-At1g64620-DAP-Seq(GSE60143)/Homer	CACTTTTT	0.0001	-9.717	0.0001	19683	0.3585	19227.9	0.3507
LBD13(LOBAS2)/colamp-LBD13-DAP-Seq(GSE60143)/Homer	KCCGTNWTTTBCGGC	0.0001	-9.583	0.0002	3613	0.0658	3391.9	0.0619
GATA3(Zf),DR8/iTreg-Gata3-ChIP-Seq(GSE20898)/Homer	AGATSTNDNNDSAGATAASN	0.0001	-9.564	0.0002	981	0.0179	866.3	0.0158
AT2G28810(C2C2dof)/colamp-AT2G28810-DAP-Seq(GSE60143)/Homer	VAAAAAGTWA	0.0001	-9.556	0.0002	28048	0.5109	27566.8	0.5027
Srebp2(bHLH)/HepG2-Srebp2-ChIP-Seq(GSE31477)/Homer	CGGTCACSCCAC	0.0001	-9.544	0.0002	1211	0.0221	1083.2	0.0198
AS2(LOBAS2)/col-AS2-DAP-Seq(GSE60143)/Homer	CCGDAAWWHMCGSCG	0.0001	-9.499	0.0002	113	0.0021	78	0.0014
bZIP69(bZIP)/col-bZIP69-DAP-Seq(GSE60143)/Homer	GACAGCTGKCAW	0.0001	-9.438	0.0002	1153	0.021	1029.3	0.0188
ERF115(AP2EREBP)/colamp-ERF115-DAP-Seq(GSE60143)/Homer	WTKRCGGCGB	0.0001	-9.383	0.0002	4627	0.0843	4380.7	0.0799
Gata4(Zf)/Heart-Gata4-ChIP-Seq(GSE35151)/Homer	NBWGATAAGR	0.0001	-9.304	0.0002	12145	0.2212	11768.4	0.2146
At5g08520(MYBrelated)/colamp-At5g08520-DAP-Seq(GSE60143)/Homer	ADBSTTATCY	0.0001	-9.303	0.0002	12312	0.2242	11933.3	0.2176
RBPJ:Ebox(?,bHLH)/Panc1-Rbpj1-ChIP-Seq(GSE47459)/Homer	GGGRAARRGRMCAGMTG	0.0001	-9.302	0.0002	3576	0.0651	3359	0.0613
IRF1(IRF)/PBMC-IRF1-ChIP-Seq(GSE43036)/Homer	GAAAGTGAAAGT	0.0001	-9.281	0.0002	1641	0.0299	1494.4	0.0273
At2g33710(AP2EREBP)/colamp-At2g33710-DAP-Seq(GSE60143)/Homer	WTKGCGGCKR	0.001	-9.202	0.0002	7048	0.1284	6751.9	0.1231
E2F4(E2F)/K562-E2F4-ChIP-Seq(GSE31477)/Homer	GGCGGGAAAH	0.001	-9.104	0.0002	1747	0.0318	1597.8	0.0291
ERF11(AP2EREBP)/col-ERF11-DAP-Seq(GSE60143)/Homer	RTGGCGGCGG	0.001	-9.007	0.0003	2138	0.0389	1973.2	0.036
MYB107(MYB)/col-MYB107-DAP-Seq(GSE60143)/Homer	RGTWGGTRRR	0.001	-8.956	0.0003	15677	0.2855	15273	0.2785
HRE(HSF)/Striatum-HSF1-ChIP-Seq(GSE38000)/Homer	TTCTAGAABNTTCTA	0.001	-8.946	0.0003	3111	0.0567	2913.7	0.0531
RARa(NR)/K562-RARa-ChIP-Seq(Encode)/Homer	TTGAMCTTTG	0.001	-8.908	0.0003	26790	0.4879	26329.7	0.4802
ZNF264(Zf)/HEK293-ZNF264.GFP-ChIP-Seq(GSE58341)/Homer	RGGGCACTAACY	0.001	-8.843	0.0003	6127	0.1116	5855.9	0.1068
dof43(C2C2dof)/colamp-dof43-DAP-Seq(GSE60143)/Homer	NAAAAAGTDA	0.001	-8.798	0.0003	19657	0.358	19227.8	0.3507
Hnf1(Homeobox)/Liver-Foxa2-Chip-Seq(GSE25694)/Homer	GGTTAAWCATTAA	0.001	-8.781	0.0003	1872	0.0341	1720.9	0.0314
AT3G58630(Trihelix)/col-AT3G58630-DAP-Seq(GSE60143)/Homer	TCTCCGGCGA	0.001	-8.737	0.0003	594	0.0108	510.9	0.0093
NLP7(RWPRK)/col-NLP7-DAP-Seq(GSE60143)/Homer	TGRCCYTTCR	0.001	-8.694	0.0004	19328	0.352	18903.3	0.3447
Barx1(Homeobox)/Stomach-Barx1.3xFlag-ChIP-Seq(GSE69483)/Homer	AAACMATTAN	0.001	-8.677	0.0004	6849	0.1247	6566.4	0.1198
At5g52660(MYBrelated)/colamp-At5g52660-DAP-Seq(GSE60143)/Homer	HAAAAATATCTW	0.001	-8.642	0.0004	7437	0.1355	7144.8	0.1303
PR(NR)/T47D-PR-ChIP-Seq(GSE31130)/Homer	VAGRACAKNCTGTBC	0.001	-8.573	0.0004	21423	0.3902	20990.9	0.3828
EIN3(EIL)/col-EIN3-DAP-Seq(GSE60143)/Homer	ARATTCAATGWATYT	0.001	-8.553	0.0004	1907	0.0347	1756.1	0.032
ESE1(AP2EREBP)/col-ESE1-DAP-Seq(GSE60143)/Homer	GGCGGCGG	0.001	-8.508	0.0004	1869	0.034	1720.6	0.0314
TRP2(MYBrelated)/colamp-TRP2-DAP-Seq(GSE60143)/Homer	TAAACCCT	0.001	-8.503	0.0004	1997	0.0364	1843.6	0.0336
DMRT1(DM)/Testis-DMRT1-ChIP-Seq(GSE64892)/Homer	TWGHWACAWTGTWDC	0.001	-8.41	0.0005	2705	0.0493	2527.1	0.0461
ZNF189(Zf)/HEK293-ZNF189.GFP-ChIP-Seq(GSE58341)/Homer	TGGAACAGMA	0.001	-8.255	0.0005	8672	0.1579	8367.5	0.1526
bHLH122(bHLH)/col100-bHLH122-DAP-Seq(GSE60143)/Homer	NDDCAASTTGHHNWW	0.001	-8.236	0.0005	8188	0.1491	7891.5	0.1439
MYB113(MYB)/col-MYB113-DAP-Seq(GSE60143)/Homer	HNDAWTCMGTTAYWN	0.001	-8.185	0.0006	7009	0.1277	6733.8	0.1228
MYB30(MYB)/colamp-MYB30-DAP-Seq(GSE60143)/Homer	AGGTAGTTGG	0.001	-8.035	0.0007	10778	0.1963	10449.3	0.1906
Nkx2.1(Homeobox)/LungAC-Nkx2.1-ChIP-Seq(GSE43252)/Homer	RSCACTYRAG	0.001	-7.979	0.0007	27268	0.4966	26835.1	0.4894
THRa(NR)/C17.2-THRa-ChIP-Seq(GSE38347)/Homer	GGTCANYTGAGGWCA	0.001	-7.866	0.0008	3963	0.0722	3757.5	0.0685
FOXM1(Forkhead)/MCF7-FOXM1-ChIP-Seq(GSE72977)/Homer	TRTTTACTTW	0.001	-7.832	0.0008	12248	0.2231	11907.1	0.2172
GTL1(Trihelix)/colamp-GTL1-DAP-Seq(GSE60143)/Homer	WWTTTACCKY	0.001	-7.825	0.0008	14249	0.2595	13888.8	0.2533
ZNF669(Zf)/HEK293-ZNF669.GFP-ChIP-Seq(GSE58341)/Homer	GARTGGTCATCGCCC	0.001	-7.771	0.0009	634	0.0115	553	0.0101
BMAL1(bHLH)/Liver-Bmal1-ChIP-Seq(GSE39860)/Homer	GNCACGTG	0.001	-7.514	0.0011	17226	0.3137	16850.8	0.3073
RAP26(AP2EREBP)/colamp-RAP26-DAP-Seq(GSE60143)/Homer	HDATGGCGGCGG	0.001	-7.373	0.0013	3190	0.0581	3012.1	0.0549
bZIP48(bZIP)/colamp-bZIP48-DAP-Seq(GSE60143)/Homer	DDWWKVTSACGTGGC	0.001	-7.304	0.0014	2768	0.0504	2603.8	0.0475
WRKY45(WRKY)/col-WRKY45-DAP-Seq(GSE60143)/Homer	HNNNKTTGACTWWNH	0.001	-7.16	0.0016	4754	0.0866	4542.4	0.0828
Oct6(POU,Homeobox)/NPC-Pou3f1-ChIP-Seq(GSE35496)/Homer	WATGCAAATGAG	0.001	-7.137	0.0016	5466	0.0996	5240.5	0.0956
AT1G71450(AP2EREBP)/col-AT1G71450-DAP-Seq(GSE60143)/Homer	DHDWTGTCGGTG	0.001	-7.076	0.0017	5425	0.0988	5201.5	0.0949
MYB94(MYB)/col-MYB94-DAP-Seq(GSE60143)/Homer	WGGTRGTTGGKA	0.001	-7.042	0.0018	4039	0.0736	3845.6	0.0701
MYB44(MYB)/colamp-MYB44-DAP-Seq(GSE60143)/Homer	CVGTTWWKTCNGTTA	0.01	-6.885	0.0021	768	0.014	685.1	0.0125
Nkx2.5(Homeobox)/HL1-Nkx2.5.biotin-ChIP-Seq(GSE21529)/Homer	RRSCACTYAA	0.01	-6.679	0.0025	22300	0.4062	21924.8	0.3998
TBP3(MYBrelated)/col-TBP3-DAP-Seq(GSE60143)/Homer	VYTAGGGCAN	0.01	-6.551	0.0029	8223	0.1498	7966	0.1453
Brn1(POU,Homeobox)/NPC-Brn1-ChIP-Seq(GSE35496)/Homer	TATGCWAATBAV	0.01	-6.494	0.003	3894	0.0709	3713.4	0.0677
AT5G56840(MYBrelated)/colamp-AT5G56840-DAP-Seq(GSE60143)/Homer	TGGATAAGGT	0.01	-6.469	0.0031	15539	0.283	15208.1	0.2774
DMRT6(DM)/Testis-DMRT6-ChIP-Seq(GSE60440)/Homer	YDGHTACAWTGTADC	0.01	-6.38	0.0034	2071	0.0377	1940.1	0.0354
AT2G28920(ND)/col-AT2G28920-DAP-Seq(GSE60143)/Homer	WAGATATTTWTW	0.01	-6.356	0.0035	4240	0.0772	4054.5	0.0739
Tcf12(bHLH)/GM12878-Tcf12-ChIP-Seq(GSE32465)/Homer	VCAGCTGYTG	0.01	-6.339	0.0035	8625	0.1571	8367.6	0.1526
ERF10(AP2EREBP)/col-ERF10-DAP-Seq(GSE60143)/Homer	RTGGCGGCGG	0.01	-6.288	0.0037	1743	0.0317	1625	0.0296
At1g75490(AP2EREBP)/colamp-At1g75490-DAP-Seq(GSE60143)/Homer	CACCGMCT	0.01	-6.266	0.0038	8242	0.1501	7992	0.1458
HRE(HSF)/HepG2-HSF1-ChIP-Seq(GSE31477)/Homer	BSTTCTRGAABVTTCYAGAA	0.01	-6.207	0.004	1832	0.0334	1711.5	0.0312
ANAC047(NAC)/colamp-ANAC047-DAP-Seq(GSE60143)/Homer	WACACGTAACTT	0.01	-6.205	0.004	4629	0.0843	4438.1	0.0809
HSF7(HSF)/colamp-HSF7-DAP-Seq(GSE60143)/Homer	TTCTAGAAGCTTCTA	0.01	-6.059	0.0046	2988	0.0544	2836.9	0.0517
BBX31(Orphan)/col-BBX31-DAP-Seq(GSE60143)/Homer	NAAAAAGTDA	0.01	-6.03	0.0047	21088	0.3841	20740.2	0.3782
AT5G61620(MYBrelated)/colamp-AT5G61620-DAP-Seq(GSE60143)/Homer	CTTATCCA	0.01	-6.024	0.0047	16652	0.3033	16328.3	0.2978
Unknown3/Drosophila-Promoters/Homer	ACVAKCTGGCAGCGC	0.01	-6.016	0.0048	708	0.0129	635.4	0.0116
ERF5(AP2EREBP)/colamp-ERF5-DAP-Seq(GSE60143)/Homer	DCMGCCGCCA	0.01	-5.976	0.0049	960	0.0175	875	0.016
OCT:OCT(POU,Homeobox)/NPC-Brn1-ChIP-Seq(GSE35496)/Homer	ATGAATATTCATGAG	0.01	-5.932	0.0052	117	0.0021	89.3	0.0016
O2(bZIP)/Corn-O2-ChIP-Seq(GSE63991)/Homer	GCTGACGTGGCA	0.01	-5.909	0.0053	1186	0.0216	1092.8	0.0199
CLOCK(bHLH)/Liver-Clock-ChIP-Seq(GSE39860)/Homer	GHCACGTG	0.01	-5.784	0.006	4349	0.0792	4172.7	0.0761
ZSCAN22(Zf)/HEK293-ZSCAN22.GFP-ChIP-Seq(GSE58341)/Homer	SMCAGTCWGAKGGAGGAGGC	0.01	-5.772	0.006	596	0.0109	531.8	0.0097
At5g65130(AP2EREBP)/colamp-At5g65130-DAP-Seq(GSE60143)/Homer	CCRCCGACAWTN	0.01	-5.554	0.0075	626	0.0114	561.2	0.0102
PPARE(NR),DR1/3T3L1-Pparg-ChIP-Seq(GSE13511)/Homer	TGACCTTTGCCCCA	0.01	-5.517	0.0077	9612	0.1751	9365.4	0.1708
AT3G52440(C2C2dof)/colamp-AT3G52440-DAP-Seq(GSE60143)/Homer	DTHACTTTTT	0.01	-5.508	0.0078	28505	0.5192	28159	0.5135
AT1G28160(AP2EREBP)/colamp-AT1G28160-DAP-Seq(GSE60143)/Homer	GGCGGCGG	0.01	-5.484	0.008	5021	0.0915	4838.3	0.0882
At1g76110(ARID)/colamp-At1g76110-DAP-Seq(GSE60143)/Homer	ATTTAATG	0.01	-5.482	0.008	9345	0.1702	9102.1	0.166
LXRE(NR),DR4/RAW-LXRb.biotin-ChIP-Seq(GSE21512)/Homer	RGGTTACTANAGGTCA	0.01	-5.45	0.0082	481	0.0088	425.4	0.0078
MYB93(MYB)/colamp-MYB93-DAP-Seq(GSE60143)/Homer	GGTAGGTGRD	0.01	-5.339	0.0092	11225	0.2044	10967.8	0.2
AGL95(ND)/col-AGL95-DAP-Seq(GSE60143)/Homer	TTCTAGAAGCTTCTA	0.01	-5.323	0.0093	1630	0.0297	1527.5	0.0279
GT3a(Trihelix)/col-GT3a-DAP-Seq(GSE60143)/Homer	WNACACGTGTYWWAW	0.01	-5.228	0.0102	1575	0.0287	1475.5	0.0269
THRb(NR)/Liver-NR1A2-ChIP-Seq(GSE52613)/Homer	TRAGGTCA	0.01	-5.214	0.0103	34281	0.6244	33947	0.6191
CAMTA5(CAMTA)/col-CAMTA5-DAP-Seq(GSE60143)/Homer	ACGCGTTTTANACRC	0.01	-5.189	0.0106	1687	0.0307	1584.4	0.0289
At5g47390(MYBrelated)/col-At5g47390-DAP-Seq(GSE60143)/Homer	CTTATCCA	0.01	-5.187	0.0106	14658	0.267	14378	0.2622
E2F1(E2F)/Hela-E2F1-ChIP-Seq(GSE22478)/Homer	CWGGCGGGAA	0.01	-5.184	0.0106	791	0.0144	721.9	0.0132
NFY(CCAAT)/Promoter/Homer	RGCCAATSRG	0.01	-5.175	0.0106	7892	0.1437	7675.8	0.14
MYB83(MYB)/colamp-MYB83-DAP-Seq(GSE60143)/Homer	CACCAACCWH	0.01	-5.128	0.0111	17024	0.3101	16730.4	0.3051
Unknown3/Arabidopsis-Promoters/Homer	AYTAAACCGG	0.01	-5.049	0.012	1064	0.0194	984.1	0.0179
WRKY11(WRKY)/col-WRKY11-DAP-Seq(GSE60143)/Homer	SCGTTGACTTTN	0.01	-5.017	0.0124	1237	0.0225	1152	0.021
dof24(C2C2dof)/col-dof24-DAP-Seq(GSE60143)/Homer	TWMCTTTTTG	0.01	-5.007	0.0125	24240	0.4415	23921.9	0.4363
SeqBias: G/A bias	RRRRRRRRRR	0.01	-5.007	0.0125	54904	1	54828.1	0.9999
RKD2(RWPRK)/colamp-RKD2-DAP-Seq(GSE60143)/Homer	GACKTTTCRDCTTCC	0.01	-4.985	0.0127	7126	0.1298	6924.5	0.1263
ABF1/SacCer-Promoters/Homer	CGTRNAAARTGA	0.01	-4.96	0.013	1374	0.025	1284.6	0.0234
ABR1(AP2EREBP)/colamp-ABR1-DAP-Seq(GSE60143)/Homer	AAATGGCGGCGG	0.01	-4.919	0.0135	2849	0.0519	2720.3	0.0496
LBD2(LOBAS2)/colamp-LBD2-DAP-Seq(GSE60143)/Homer	TCCGAWTTTTTCGGN	0.01	-4.889	0.0139	1726	0.0314	1626.9	0.0297
SHN3(AP2EREBP)/col-SHN3-DAP-Seq(GSE60143)/Homer	CCGCCGCC	0.01	-4.811	0.015	528	0.0096	474.5	0.0087
HIF2a(bHLH)/785_O-HIF2a-ChIP-Seq(GSE34871)/Homer	GCACGTACCC	0.01	-4.811	0.015	2894	0.0527	2766.5	0.0505
At4g38000(C2C2dof)/col-At4g38000-DAP-Seq(GSE60143)/Homer	WWWTWACTTTTT	0.01	-4.801	0.0151	17318	0.3154	17035.1	0.3107
ZNF675(Zf)/HEK293-ZNF675.GFP-ChIP-Seq(GSE58341)/Homer	ARGAGGMCAAAATGW	0.01	-4.768	0.0156	1752	0.0319	1653.6	0.0302
Egr2(Zf)/Thymocytes-Egr2-ChIP-Seq(GSE34254)/Homer	NGCGTGGGCGGR	0.01	-4.683	0.017	833	0.0152	766.8	0.014
At5g18450(AP2EREBP)/col-At5g18450-DAP-Seq(GSE60143)/Homer	CACCGCTT	0.01	-4.68	0.017	6858	0.1249	6668.4	0.1216
bZIP42(bZIP)/colamp-bZIP42-DAP-Seq(GSE60143)/Homer	GCCACGTCAGCA	0.01	-4.67	0.0171	38	0.0007	25.6	0.0005
At1g19210(AP2EREBP)/colamp-At1g19210-DAP-Seq(GSE60143)/Homer	HCACCGACCAHN	0.01	-4.66	0.0173	5644	0.1028	5471.6	0.0998
PLT3(AP2EREBP)/col-PLT3-DAP-Seq(GSE60143)/Homer	GCACGNWTHYCGAGG	0.01	-4.629	0.0178	408	0.0074	362.7	0.0066
GRHL2(CP2)/HBE-GRHL2-ChIP-Seq(GSE46194)/Homer	AAACYKGTTWDACMRGTTTB	0.01	-4.617	0.018	3738	0.0681	3597.7	0.0656
PIF4(bHLH)/Seedling-PIF4-ChIP-Seq(GSE35315)/Homer	NNBCACGTGN	0.1	-4.575	0.0187	12025	0.219	11786.5	0.215
PU.1:IRF8(ETS:IRF)/pDC-Irf8-ChIP-Seq(GSE66899)/Homer	GGAAGTGAAAST	0.1	-4.567	0.0188	2255	0.0411	2146.5	0.0391
GBF6(bZIP)/colamp-GBF6-DAP-Seq(GSE60143)/Homer	WWTGMCACGTCABCW	0.1	-4.553	0.019	1480	0.027	1392.9	0.0254
ZNF7(Zf)/HepG2-ZNF7.Flag-ChIP-Seq(Encode)/Homer	CTGCCWVCTTTTRTA	0.1	-4.533	0.0194	5956	0.1085	5782.1	0.1054
Sox10(HMG)/SciaticNerve-Sox3-ChIP-Seq(GSE35132)/Homer	CCWTTGTYYB	0.1	-4.452	0.021	16785	0.3057	16520	0.3013
AT4G18450(AP2EREBP)/col-AT4G18450-DAP-Seq(GSE60143)/Homer	ATGGCGGCKG	0.1	-4.409	0.0219	906	0.0165	839.2	0.0153
AREB3(bZIP)/col-AREB3-DAP-Seq(GSE60143)/Homer	NKGMCACGTGDCMNN	0.1	-4.378	0.0225	2017	0.0367	1917.2	0.035
At3g09600(MYBrelated)/colamp-At3g09600-DAP-Seq(GSE60143)/Homer	AAAATATCTT	0.1	-4.367	0.0227	7281	0.1326	7095.4	0.1294
MYB61(MYB)/colamp-MYB61-DAP-Seq(GSE60143)/Homer	HCYACCTACC	0.1	-4.361	0.0228	14536	0.2648	14287.4	0.2606
DREB19(AP2EREBP)/colamp-DREB19-DAP-Seq(GSE60143)/Homer	AATGTCGGTK	0.1	-4.342	0.0232	1882	0.0343	1786.5	0.0326
FUS3(ABI3VP1)/col-FUS3-DAP-Seq(GSE60143)/Homer	DNNWTNTGCATGKNN	0.1	-4.316	0.0238	10627	0.1936	10409.6	0.1898
CRF4(AP2EREBP)/colamp-CRF4-DAP-Seq(GSE60143)/Homer	CGCCGCCA	0.1	-4.312	0.0238	1136	0.0207	1062.8	0.0194
MYB49(MYB)/col-MYB49-DAP-Seq(GSE60143)/Homer	ARKTAGGTRR	0.1	-4.311	0.0238	11731	0.2137	11504.6	0.2098
PRDM1(Zf)/Hela-PRDM1-ChIP-Seq(GSE31477)/Homer	ACTTTCACTTTC	0.1	-4.3	0.024	6779	0.1235	6601.6	0.1204
bZIP28(bZIP)/col-bZIP28-DAP-Seq(GSE60143)/Homer	TGCCACGTSABH	0.1	-4.267	0.0248	1735	0.0316	1644.2	0.03
SPL11(SBP)/col100-SPL11-DAP-Seq(GSE60143)/Homer	YTGTACTTBH	0.1	-4.254	0.0251	6976	0.1271	6797.1	0.124
FOXA1(Forkhead)/LNCAP-FOXA1-ChIP-Seq(GSE27824)/Homer	WAAGTAAACA	0.1	-4.18	0.027	14109	0.257	13870.8	0.253
REB1/SacCer-Promoters/Homer	KCCGGGTAAYRR	0.1	-4.129	0.0283	1553	0.0283	1469.3	0.0268
REM16(ABI3VP1)/col-REM16-DAP-Seq(GSE60143)/Homer	DTTTTTSCCGSMAAA	0.1	-4.095	0.0292	6	0.0001	2.1	0
ERF8(AP2EREBP)/colamp-ERF8-DAP-Seq(GSE60143)/Homer	CGCCGYCATW	0.1	-4.079	0.0297	2909	0.053	2795.5	0.051
EPR1(MYBrelated)/colamp-EPR1-DAP-Seq(GSE60143)/Homer	AAATATCT	0.1	-4.061	0.0301	5512	0.1004	5357.9	0.0977
LHY1(MYBrelated)/col-LHY1-DAP-Seq(GSE60143)/Homer	AAATATCT	0.1	-4.061	0.0301	5512	0.1004	5357.9	0.0977
AT3G10030(Trihelix)/colamp-AT3G10030-DAP-Seq(GSE60143)/Homer	GCCGTTAA	0.1	-4.06	0.0301	5075	0.0924	4926.9	0.0899
GT2(Trihelix)/colamp-GT2-DAP-Seq(GSE60143)/Homer	AMGGTAAAWWWN	0.1	-3.929	0.0342	14482	0.2638	14251.3	0.2599
ETS:E-box(ETS,bHLH)/HPC7-Scl-ChIP-Seq(GSE22178)/Homer	AGGAARCAGCTG	0.1	-3.881	0.0358	935	0.017	873	0.0159
ANAC045(NAC)/col-ANAC045-DAP-Seq(GSE60143)/Homer	DNCKTVNNNNNNAMG	0.1	-3.829	0.0377	17555	0.3197	17312.8	0.3157
HOXA1(Homeobox)/mES-Hoxa1-ChIP-Seq(SRP084292)/Homer	TGATKGATGR	0.1	-3.812	0.0383	3338	0.0608	3222.8	0.0588
ERF3(AP2EREBP)/colamp-ERF3-DAP-Seq(GSE60143)/Homer	ATGGCGGCGG	0.1	-3.747	0.0408	1549	0.0282	1471.7	0.0268
HIF-1a(bHLH)/MCF7-HIF1a-ChIP-Seq(GSE28352)/Homer	TACGTGCV	0.1	-3.711	0.0422	1997	0.0364	1909.3	0.0348
RAR:RXR(NR),DR5/ES-RAR-ChIP-Seq(GSE56893)/Homer	RGGTCADNNAGAGGTCAV	0.1	-3.685	0.0432	296	0.0054	263.5	0.0048
CES-1(Homeobox)/cElegans-L1-CES1-ChIP-Seq(modEncode)/Homer	AAATTSAATTTN	0.1	-3.66	0.0443	8144	0.1483	7972.9	0.1454
At4g16750(AP2EREBP)/col-At4g16750-DAP-Seq(GSE60143)/Homer	HACCGACAHA	0.1	-3.578	0.0479	2619	0.0477	2521.6	0.046
GATA3(Zf),DR4/iTreg-Gata3-ChIP-Seq(GSE20898)/Homer	AGATGKDGAGATAAG	0.1	-3.549	0.0493	1104	0.0201	1041	0.019
HSFC1(HSF)/col-HSFC1-DAP-Seq(GSE60143)/Homer	HTTCTAGAADCTTCT	0.1	-3.544	0.0494	3173	0.0578	3066.2	0.0559
FOXA1(Forkhead)/MCF7-FOXA1-ChIP-Seq(GSE26831)/Homer	WAAGTAAACA	0.1	-3.543	0.0494	11757	0.2141	11560.9	0.2108
AP-2gamma(AP2)/MCF7-TFAP2C-ChIP-Seq(GSE21234)/Homer	SCCTSAGGSCAW	0.1	-3.52	0.0505	8921	0.1625	8747.5	0.1595
At4g28140(AP2EREBP)/colamp-At4g28140-DAP-Seq(GSE60143)/Homer	DCCACCGACCAW	0.1	-3.502	0.0513	1024	0.0187	964.7	0.0176
Usf2(bHLH)/C2C12-Usf2-ChIP-Seq(GSE36030)/Homer	GTCACGTGGT	0.1	-3.48	0.0524	2625	0.0478	2529.5	0.0461
GEI-11(Myb?)/cElegans-L4-GEI11-ChIP-Seq(modEncode)/Homer	CCGACAYYTYACGGG	0.1	-3.469	0.0528	305	0.0056	273.3	0.005
MYB27(MYB)/colamp-MYB27-DAP-Seq(GSE60143)/Homer	TACCTAACWT	0.1	-3.467	0.0529	2119	0.0386	2033.5	0.0371
MYB13(MYB)/col-MYB13-DAP-Seq(GSE60143)/Homer	HYCACCWACCHH	0.1	-3.459	0.0532	6643	0.121	6493.7	0.1184
PIF5ox(bHLH)/Arabidopsis-PIF5ox-ChIP-Seq(GSE35062)/Homer	BCACGTGVDN	0.1	-3.423	0.0551	9733	0.1773	9556.4	0.1743
BIM2(bHLH)/col-BIM2-DAP-Seq(GSE60143)/Homer	NNNNCACGTGNN	0.1	-3.4	0.0562	8185	0.1491	8022.9	0.1463
ANAC017(NAC)/colamp-ANAC017-DAP-Seq(GSE60143)/Homer	TMCTTGNNNNNCAAG	0.1	-3.396	0.0564	722	0.0132	673.5	0.0123
ATHB13(Homeobox)/col-ATHB13-DAP-Seq(GSE60143)/Homer	CAATAATT	0.1	-3.347	0.0591	15982	0.2911	15769.4	0.2876
Unknown1(NR/Ini-like)/Drosophila-Promoters/Homer	MYGGTCACACTG	0.1	-3.338	0.0595	1852	0.0337	1774.6	0.0324
ZIM(C2C2gata)/col-ZIM-DAP-Seq(GSE60143)/Homer	ATCSRACGGTYRAGA	0.1	-3.326	0.0602	50	0.0009	38.4	0.0007
NTM1(NAC)/col-NTM1-DAP-Seq(GSE60143)/Homer	ACTTRTARAASAAGT	0.1	-3.279	0.0629	5024	0.0915	4898.8	0.0893
Nkx2.2(Homeobox)/NPC-Nkx2.2-ChIP-Seq(GSE61673)/Homer	BTBRAGTGSN	0.1	-3.233	0.0658	19181	0.3494	18960.5	0.3458
Oct4:Sox17(POU,Homeobox,HMG)/F9-Sox17-ChIP-Seq(GSE44553)/Homer	CCATTGTATGCAAAT	0.1	-3.195	0.0682	1603	0.0292	1533.6	0.028
ISRE(IRF)/ThioMac-LPS-Expression(GSE23622)/Homer	AGTTTCASTTTC	0.1	-3.148	0.0714	602	0.011	560.7	0.0102
CEJ1(AP2EREBP)/col-CEJ1-DAP-Seq(GSE60143)/Homer	WWTGTCGGTG	0.1	-3.096	0.075	3654	0.0666	3551.4	0.0648
KANADI1(Myb)/Seedling-KAN1-ChIP-Seq(GSE48081)/Homer	ARGAATAWWN	0.1	-3.084	0.0759	16411	0.2989	16209.7	0.2956
WRKY46(WRKY)/colamp-WRKY46-DAP-Seq(GSE60143)/Homer	AAAGTCAACGSN	0.1	-3.068	0.077	490	0.0089	453.1	0.0083
At1g36060(AP2EREBP)/colamp-At1g36060-DAP-Seq(GSE60143)/Homer	NNWWKGTCGGTG	0.1	-3.066	0.077	2406	0.0438	2323	0.0424
DPL-1(E2F)/cElegans-Adult-ChIP-Seq(modEncode)/Homer	TAGCGCGC	0.1	-3.056	0.0776	1823	0.0332	1751	0.0319
NFkB-p50,p52(RHD)/Monocyte-p50-ChIP-Chip(Schreiber_et_al.)/Homer	GGGGGAATCCCC	0.1	-3.026	0.0799	903	0.0164	853.2	0.0156
DREB2(AP2EREBP)/col-DREB2-DAP-Seq(GSE60143)/Homer	TMACCGACATWA	0.1	-3.02	0.0802	1660	0.0302	1592.3	0.029
CBF4(AP2EREBP)/colamp-CBF4-DAP-Seq(GSE60143)/Homer	NRCCGACDWNNNNNN	0.1	-3.017	0.0803	2296	0.0418	2216.8	0.0404
AT3G10113(MYBrelated)/col-AT3G10113-DAP-Seq(GSE60143)/Homer	WNAAATATCWWN	0.1	-2.994	0.082	6564	0.1196	6431.2	0.1173
At4g31060(AP2EREBP)/colamp-At4g31060-DAP-Seq(GSE60143)/Homer	CACCGACAAW	0.1	-2.937	0.0867	1403	0.0256	1342.9	0.0245
Nur77(NR)/K562-NR4A1-ChIP-Seq(GSE31363)/Homer	TGACCTTTNCNT	0.1	-2.935	0.0867	2170	0.0395	2094.2	0.0382
Max(bHLH)/K562-Max-ChIP-Seq(GSE31477)/Homer	RCCACGTGGYYN	0.1	-2.889	0.0906	5925	0.1079	5803	0.1058
HNF1b(Homeobox)/PDAC-HNF1B-ChIP-Seq(GSE64557)/Homer	GTTAATNATTAA	0.1	-2.889	0.0906	2058	0.0375	1985.8	0.0362
AT2G01818(PLATZ)/col-AT2G01818-DAP-Seq(GSE60143)/Homer	TCTAGAABSTTC	0.1	-2.85	0.094	2342	0.0427	2265.8	0.0413
CCA(Myb)/Arabidopsis-CCA.GFP-ChIP-Seq(GSE70533)/Homer	AGATATYTTT	0.1	-2.834	0.0954	10888	0.1983	10728.3	0.1957
ANAC062(NAC)/colamp-ANAC062-DAP-Seq(GSE60143)/Homer	TACTTANTNWNYAAG	0.1	-2.763	0.1021	3846	0.07	3750.9	0.0684
Mouse_Recombination_Hotspot(Zf)/Testis-DMC1-ChIP-Seq(GSE24438)/Homer	ACTYKNATTCGTGNTACTTC	0.1	-2.744	0.1039	828	0.0151	784	0.0143
THRb(NR)/HepG2-THRb.Flag-ChIP-Seq(Encode)/Homer	GGTCACCTGAGGTCA	0.1	-2.735	0.1047	5173	0.0942	5063.9	0.0924
AIL7(AP2EREBP)/colamp-AIL7-DAP-Seq(GSE60143)/Homer	KCACRAWTYYCGAGG	0.1	-2.731	0.1049	4352	0.0793	4251.5	0.0775
MYB58(MYB)/colamp-MYB58-DAP-Seq(GSE60143)/Homer	YYYACCWACC	0.1	-2.716	0.1064	9588	0.1746	9442.6	0.1722
Gata6(Zf)/HUG1N-GATA6-ChIP-Seq(GSE51936)/Homer	YCTTATCTBN	0.1	-2.708	0.107	11034	0.201	10879.8	0.1984
ATHB7(Homeobox)/col-ATHB7-DAP-Seq(GSE60143)/Homer	AATGATTG	0.1	-2.669	0.1111	9603	0.1749	9459.3	0.1725
EFL-1(E2F)/cElegans-L1-EFL1-ChIP-Seq(modEncode)/Homer	TGCAARYGCGCTCYA	0.1	-2.657	0.1123	122	0.0022	106.2	0.0019
Rap210(AP2EREBP)/col-Rap210-DAP-Seq(GSE60143)/Homer	TGTCGGCA	0.1	-2.646	0.1133	1845	0.0336	1781.2	0.0325
TFE3(bHLH)/MEF-TFE3-ChIP-Seq(GSE75757)/Homer	GTCACGTGACYV	0.1	-2.645	0.1133	564	0.0103	529.4	0.0097
Zac1(Zf)/Neuro2A-Plagl1-ChIP-Seq(GSE75942)/Homer	HAWGRGGCCM	0.1	-2.63	0.1148	23549	0.4289	23349.8	0.4258
MYB3R4(MYB)/col-MYB3R4-DAP-Seq(GSE60143)/Homer	AWWTAACCGTTR	0.1	-2.616	0.1163	1025	0.0187	978	0.0178
AT1G69570(C2C2dof)/col-AT1G69570-DAP-Seq(GSE60143)/Homer	WAAAAGTGHH	0.1	-2.555	0.1234	16023	0.2918	15851.2	0.2891
ERF4(AP2EREBP)/colamp-ERF4-DAP-Seq(GSE60143)/Homer	WDWTGGCGGCGG	0.1	-2.538	0.1252	2796	0.0509	2720.1	0.0496
ANAC079(NAC)/colamp-ANAC079-DAP-Seq(GSE60143)/Homer	TACACGCAACCT	0.1	-2.521	0.1273	3297	0.0601	3215.3	0.0586
At1g22810(AP2EREBP)/colamp-At1g22810-DAP-Seq(GSE60143)/Homer	BCACCGACANNN	0.1	-2.47	0.1337	1493	0.0272	1439	0.0262
bZIP68(bZIP)/col-bZIP68-DAP-Seq(GSE60143)/Homer	WGCCACGTGK	0.1	-2.372	0.1472	2251	0.041	2187.9	0.0399
CBF1(AP2EREBP)/colamp-CBF1-DAP-Seq(GSE60143)/Homer	YRCCGACATN	0.1	-2.355	0.1495	2212	0.0403	2149.4	0.0392
MYB3R5(MYB)/col-MYB3R5-DAP-Seq(GSE60143)/Homer	THYAACGGTHAWAWT	0.1	-2.349	0.1502	484	0.0088	455.3	0.0083
RAP212(AP2EREBP)/col-RAP212-DAP-Seq(GSE60143)/Homer	CGCCGCCATTTT	0.1	-2.34	0.1513	1712	0.0312	1657.2	0.0302
AT1G72740(MYBrelated)/colamp-AT1G72740-DAP-Seq(GSE60143)/Homer	NNWWAMCCTAAHWNN	0.1	-2.322	0.1538	11690	0.2129	11551.7	0.2107
Pax7(Paired,Homeobox),long/Myoblast-Pax7-ChIP-Seq(GSE25064)/Homer	TAATCHGATTAC	1	-2.282	0.1598	353	0.0064	329.7	0.006
bHLH157(bHLH)/col-bHLH157-DAP-Seq(GSE60143)/Homer	KACACGTCTCTY	1	-2.277	0.1603	1494	0.0272	1444.1	0.0263
IRF8(IRF)/BMDM-IRF8-ChIP-Seq(GSE77884)/Homer	GRAASTGAAAST	1	-2.267	0.1617	3545	0.0646	3469	0.0633
DEAR5(AP2EREBP)/col-DEAR5-DAP-Seq(GSE60143)/Homer	NDWTGTCGGTGRWDN	1	-2.259	0.1627	557	0.0101	527.1	0.0096
LOB(LOBAS2)/col-LOB-DAP-Seq(GSE60143)/Homer	CGCCGKAWWTTHCGS	1	-2.239	0.1658	461	0.0084	434.4	0.0079
WRKY21(WRKY)/colamp-WRKY21-DAP-Seq(GSE60143)/Homer	DCGTTGACTTTT	1	-2.223	0.1682	1111	0.0202	1069.9	0.0195
TATA-box/Drosophila-Promoters/Homer	CTATAAAAGCSV	1	-2.192	0.1732	844	0.0154	808.6	0.0147
At2g03500(G2like)/col-At2g03500-DAP-Seq(GSE60143)/Homer	WWAGAATATTCT	1	-2.181	0.1748	3070	0.0559	3001.9	0.0547
bZIP53(bZIP)/colamp-bZIP53-DAP-Seq(GSE60143)/Homer	NDNHSACGTGKMNNN	1	-2.175	0.1757	2115	0.0385	2058.7	0.0375
WRKY50(WRKY)/col-WRKY50-DAP-Seq(GSE60143)/Homer	NNTTGACTWNNGNNN	1	-2.163	0.1775	10474	0.1908	10350.8	0.1888
CDM1(C3H)/colamp-CDM1-DAP-Seq(GSE60143)/Homer	CCGAWAWTWTCGGAN	1	-2.151	0.1794	429	0.0078	404.7	0.0074
MYB63(MYB)/col-MYB63-DAP-Seq(GSE60143)/Homer	BHYACCWACCHH	1	-2.124	0.184	4572	0.0833	4490.6	0.0819
MS188(MYB)/colamp-MS188-DAP-Seq(GSE60143)/Homer	WARKTAGGTRRA	1	-2.105	0.1872	8880	0.1617	8768.9	0.1599
MYB55(MYB)/colamp-MYB55-DAP-Seq(GSE60143)/Homer	YACCWAMC	1	-2.104	0.1872	10900	0.1985	10777.2	0.1965
Pax7(Paired,Homeobox),longest/Myoblast-Pax7-ChIP-Seq(GSE25064)/Homer	NTAATTDGCYAATTANNWWD	1	-2.095	0.1885	352	0.0064	330.5	0.006
SeqBias: C/A-bias	MMMMMMMMMM	1	-2.087	0.1898	54902	1	54828.8	0.9999
DEAR2(AP2EREBP)/colamp-DEAR2-DAP-Seq(GSE60143)/Homer	HCACCGACAWHD	1	-2.044	0.1978	3808	0.0694	3736.7	0.0681
TSO1(CPP)/col-TSO1-DAP-Seq(GSE60143)/Homer	RAATTTRAAW	1	-2.034	0.1995	2337	0.0426	2282	0.0416
AT1G19040(NAC)/col-AT1G19040-DAP-Seq(GSE60143)/Homer	CTTGNDNHNCAAGYW	1	-1.922	0.2228	774	0.0141	744	0.0136
FAR1(FAR1)/col-FAR1-DAP-Seq(GSE60143)/Homer	TKNNNYYCACGCGCY	1	-1.904	0.2264	290	0.0053	272.1	0.005
GATA1(C2C2gata)/colamp-GATA1-DAP-Seq(GSE60143)/Homer	DDWWYYAGATCTRRW	1	-1.899	0.2273	4080	0.0743	4012	0.0732
GT1(Trihelix)/col-GT1-DAP-Seq(GSE60143)/Homer	TTAACCATGGTTAAD	1	-1.882	0.2307	134	0.0024	122.4	0.0022
MYB67(MYB)/col-MYB67-DAP-Seq(GSE60143)/Homer	YYYACCTAAC	1	-1.88	0.2309	9660	0.1759	9556.5	0.1743
Sox6(HMG)/Myotubes-Sox6-ChIP-Seq(GSE32627)/Homer	CCATTGTTNY	1	-1.865	0.2339	16938	0.3085	16806.4	0.3065
ANAC053(NAC)/colamp-ANAC053-DAP-Seq(GSE60143)/Homer	TDCTTGNNNNNCAAG	1	-1.85	0.2371	4567	0.0832	4496.5	0.082
ABF2(bZIP)/col-ABF2-DAP-Seq(GSE60143)/Homer	KGMCACGTGDCMHHH	1	-1.83	0.2416	1368	0.0249	1330.6	0.0243
ERF38(AP2EREBP)/col-ERF38-DAP-Seq(GSE60143)/Homer	CACCGACA	1	-1.805	0.2472	1483	0.027	1444.9	0.0264
Tbr1(T-box)/Cortex-Tbr1-ChIP-Seq(GSE71384)/Homer	AAGGTGTKAA	1	-1.805	0.2472	15158	0.2761	15036.7	0.2742
PUCHI(AP2EREBP)/colamp-PUCHI-DAP-Seq(GSE60143)/Homer	GCGCCGTY	1	-1.784	0.2518	1099	0.02	1066.4	0.0194
OBP4(C2C2dof)/col-OBP4-DAP-Seq(GSE60143)/Homer	WTTHACTTTTTB	1	-1.782	0.2519	19822	0.361	19688.6	0.3591
RXR(NR),DR1/3T3L1-RXR-ChIP-Seq(GSE13511)/Homer	TAGGGCAAAGGTCA	1	-1.777	0.2528	10969	0.1998	10865.7	0.1982
GFY(?)/Promoter/Homer	ACTACAATTCCC	1	-1.756	0.2579	471	0.0086	450.5	0.0082
PCF/Arabidopsis-Promoters/Homer	NNWWWTGGGCYTDDN	1	-1.753	0.2582	2782	0.0507	2730.1	0.0498
SGR5(C2H2)/colamp-SGR5-DAP-Seq(GSE60143)/Homer	TTTGTCTTTTTT	1	-1.734	0.2627	8348	0.152	8259.6	0.1506
ZNF528(Zf)/HEK293-ZNF528.GFP-ChIP-Seq(GSE58341)/Homer	AGAAATGACTTCCCT	1	-1.697	0.2723	76	0.0014	68.6	0.0013
RRTF1(AP2EREBP)/colamp-RRTF1-DAP-Seq(GSE60143)/Homer	CCGCCGCHATTT	1	-1.676	0.2776	628	0.0114	605.1	0.011
ANAC042(NAC)/col-ANAC042-DAP-Seq(GSE60143)/Homer	CGTNDHNDHNACGKY	1	-1.662	0.2812	1455	0.0265	1420.5	0.0259
At1g19000(MYBrelated)/colamp-At1g19000-DAP-Seq(GSE60143)/Homer	WWTGGATAADDT	1	-1.604	0.2975	11013	0.2006	10920.4	0.1992
Unknown1/Arabidopsis-Promoters/Homer	RGGGTAWWWTHGTAA	1	-1.603	0.2975	1101	0.0201	1072.5	0.0196
bZIP16(bZIP)/colamp-bZIP16-DAP-Seq(GSE60143)/Homer	TGCCACGTGD	1	-1.59	0.3007	1805	0.0329	1768.8	0.0323
AT1G12630(AP2EREBP)/colamp-AT1G12630-DAP-Seq(GSE60143)/Homer	TGTCGGCA	1	-1.542	0.315	1654	0.0301	1621	0.0296
ZML1(C2C2gata)/colamp-ZML1-DAP-Seq(GSE60143)/Homer	ATCWYRACCGTTSRW	1	-1.522	0.3208	56	0.001	50.8	0.0009
ZNF317(Zf)/HEK293-ZNF317.GFP-ChIP-Seq(GSE58341)/Homer	GTCWGCTGTYYCTCT	1	-1.49	0.3309	777	0.0142	756	0.0138
ZNF165(Zf)/WHIM12-ZNF165-ChIP-Seq(GSE65937)/Homer	AAGGKGRCGCAGGCA	1	-1.474	0.3358	1026	0.0187	1001.7	0.0183
AT5G59990(C2C2COlike)/colamp-AT5G59990-DAP-Seq(GSE60143)/Homer	TCTCAACCGTTCATT	1	-1.47	0.3366	171	0.0031	161.1	0.0029
FOXK2(Forkhead)/U2OS-FOXK2-ChIP-Seq(E-MTAB-2204)/Homer	SCHTGTTTACAT	1	-1.458	0.34	7148	0.1302	7082	0.1292
PIF7(bHLH)/col-PIF7-DAP-Seq(GSE60143)/Homer	CCACGTGGNH	1	-1.442	0.3451	1264	0.023	1237.2	0.0226
Brachyury(T-box)/Mesoendoderm-Brachyury-ChIP-exo(GSE54963)/Homer	ANTTMRCASBNNNGTGYKAAN	1	-1.417	0.3532	2828	0.0515	2788.1	0.0508
RAP21(AP2EREBP)/colamp-RAP21-DAP-Seq(GSE60143)/Homer	BCACCGACAHNN	1	-1.397	0.36	629	0.0115	611.4	0.0111
HNF4a(NR),DR1/HepG2-HNF4a-ChIP-Seq(GSE25021)/Homer	CARRGKBCAAAGTYCA	1	-1.379	0.366	4683	0.0853	4633	0.0845
DUX(Homeobox)/C2C12-Dux-ChIP-Seq(GSE87279)/Homer	BCWGATTCAATCAAN	1	-1.37	0.3688	52	0.0009	47.1	0.0009
HOXA2(Homeobox)/mES-Hoxa2-ChIP-Seq(Donaldson_et_al.)/Homer	GYCATCMATCAT	1	-1.368	0.369	1265	0.023	1240.2	0.0226
BAM8(BES1)/col-BAM8-DAP-Seq(GSE60143)/Homer	NNWSACACGTGTSWN	1	-1.355	0.3733	1016	0.0185	994.7	0.0181
SeqBias: GCW-triplet	GCWGCWGCWGCW	1	-1.331	0.3816	54901	0.9999	54828.8	0.9999
AT1G44830(AP2EREBP)/col-AT1G44830-DAP-Seq(GSE60143)/Homer	NCCACCGACA	1	-1.331	0.3816	1168	0.0213	1145.1	0.0209
ATHB20(Homeobox)/colamp-ATHB20-DAP-Seq(GSE60143)/Homer	CAATHATT	1	-1.316	0.3862	6177	0.1125	6124	0.1117
SPL1(SBP)/colamp-SPL1-DAP-Seq(GSE60143)/Homer	HYGTACDTWH	1	-1.279	0.4004	17014	0.3099	16928.7	0.3087
HSFA1E(HSF)/col-HSFA1E-DAP-Seq(GSE60143)/Homer	TTCTAGAAGCTTCTA	1	-1.269	0.404	1243	0.0226	1221.1	0.0223
TR4(NR),DR1/Hela-TR4-ChIP-Seq(GSE24685)/Homer	GAGGTCAAAGGTCA	1	-1.268	0.404	939	0.0171	920.8	0.0168
AT1G77200(AP2EREBP)/colamp-AT1G77200-DAP-Seq(GSE60143)/Homer	ACCGACAHWD	1	-1.249	0.4106	2663	0.0485	2631.9	0.048
CRF10(AP2EREBP)/col100-CRF10-DAP-Seq(GSE60143)/Homer	DCCGCCGYHA	1	-1.247	0.4111	2524	0.046	2493.5	0.0455
SPL15(SBP)/colamp-SPL15-DAP-Seq(GSE60143)/Homer	WDWMMGTACADW	1	-1.227	0.4186	13248	0.2413	13176.5	0.2403
Phox2a(Homeobox)/Neuron-Phox2a-ChIP-Seq(GSE31456)/Homer	YTAATYNRATTA	1	-1.217	0.4223	5724	0.1043	5678.4	0.1036
GATA11(C2C2gata)/col-GATA11-DAP-Seq(GSE60143)/Homer	DDHYYAGATCTR	1	-1.211	0.4244	4472	0.0815	4432.2	0.0808
Gata1(Zf)/K562-GATA1-ChIP-Seq(GSE18829)/Homer	SAGATAAGRV	1	-1.202	0.4273	6691	0.1219	6642.2	0.1211
AT3G16280(AP2EREBP)/colamp-AT3G16280-DAP-Seq(GSE60143)/Homer	HCACCGACAHHDHHN	1	-1.193	0.4305	1149	0.0209	1130.4	0.0206
E2F7(E2F)/Hela-E2F7-ChIP-Seq(GSE32673)/Homer	VDTTTCCCGCCA	1	-1.188	0.4321	336	0.0061	326.9	0.006
HLH-1(bHLH)/cElegans-Embryo-HLH1-ChIP-Seq(modEncode)/Homer	RACAGCTGTTBH	1	-1.161	0.4434	8036	0.1464	7985.1	0.1456
ANAC004(NAC)/colamp-ANAC004-DAP-Seq(GSE60143)/Homer	WNCTTVYNNNRBAAG	1	-1.16	0.4434	3580	0.0652	3547	0.0647
WRKY8(WRKY)/colamp-WRKY8-DAP-Seq(GSE60143)/Homer	CGTTGACTTT	1	-1.142	0.4506	1212	0.0221	1194.7	0.0218
ANAC016(NAC)/col-ANAC016-DAP-Seq(GSE60143)/Homer	WNCTTGNNNNNCAMG	1	-1.13	0.4553	6648	0.1211	6604.1	0.1204
DUX4(Homeobox)/Myoblasts-DUX4.V5-ChIP-Seq(GSE75791)/Homer	NWTAAYCYAATCAWN	1	-1.12	0.4594	507	0.0092	496.7	0.0091
At1g74840(MYBrelated)/col100-At1g74840-DAP-Seq(GSE60143)/Homer	YHTTATCCAWWT	1	-1.042	0.4959	9835	0.1791	9788.8	0.1785
Pbx3(Homeobox)/GM12878-PBX3-ChIP-Seq(GSE32465)/Homer	SCTGTCAMTCAN	1	-1.041	0.4959	2110	0.0384	2090	0.0381
MYB3R1(MYB)/col-MYB3R1-DAP-Seq(GSE60143)/Homer	WWDTDACCGTTR	1	-1.022	0.5043	2072	0.0377	2053.1	0.0374
Sox3(HMG)/NPC-Sox3-ChIP-Seq(GSE33059)/Homer	CCWTTGTY	1	-1.02	0.505	18068	0.3291	18005.6	0.3284
Gata2(Zf)/K562-GATA2-ChIP-Seq(GSE18829)/Homer	BBCTTATCTS	1	-1.019	0.505	7627	0.1389	7588.8	0.1384
Ik-1	NHTTGGGAATRCC	1	-1.001	0.5129	54904	1	54833.5	1
Phox2b(Homeobox)/CLBGA-PHOX2B-ChIP-Seq(GSE90683)/Homer	TTAATTNAATTA	1	-0.9625	0.5325	2953	0.0538	2933.2	0.0535
DEAR3(AP2EREBP)/colamp-DEAR3-DAP-Seq(GSE60143)/Homer	BCACCGACAWNNNNN	1	-0.9272	0.5508	1216	0.0221	1205.6	0.022
ANAC005(NAC)/col-ANAC005-DAP-Seq(GSE60143)/Homer	WVCTTVTWNHABAAG	1	-0.9176	0.5554	5371	0.0978	5346.7	0.0975
Ronin(THAP)/ES-Thap11-ChIP-Seq(GSE51522)/Homer	RACTACAACTCCCAGVAKGC	1	-0.8698	0.5818	62	0.0011	60.8	0.0011
At3g11280(MYBrelated)/col-At3g11280-DAP-Seq(GSE60143)/Homer	GATAAGRT	1	-0.8674	0.5823	10230	0.1863	10198.3	0.186
ZNF415(Zf)/HEK293-ZNF415.GFP-ChIP-Seq(GSE58341)/Homer	GRTGMTRGAGCC	1	-0.8316	0.6027	4661	0.0849	4644.1	0.0847
HAT1(Homeobox)/col-HAT1-DAP-Seq(GSE60143)/Homer	SCAATCATTGNN	1	-0.8133	0.613	2304	0.042	2294.5	0.0418
WRKY7(WRKY)/colamp-WRKY7-DAP-Seq(GSE60143)/Homer	AAAAGTCAACGSHWD	1	-0.8073	0.6158	23	0.0004	22.3	0.0004
AT2G20400(G2like)/colamp-AT2G20400-DAP-Seq(GSE60143)/Homer	DNVGAATATTCBNHN	1	-0.8044	0.6167	1735	0.0316	1728	0.0315
AT4G00250(GeBP)/col-AT4G00250-DAP-Seq(GSE60143)/Homer	WDTGGATAAKRT	1	-0.8011	0.6179	7283	0.1326	7263.6	0.1325
AT4G26030(C2H2)/col-AT4G26030-DAP-Seq(GSE60143)/Homer	BYYACCWACY	1	-0.7917	0.6229	10020	0.1825	9996.8	0.1823
LIN-15B(Zf)/cElegans-L3-LIN15B-ChIP-Seq(modEncode)/Homer	CARTGGAGCGCRYTTGCATT	1	-0.7905	0.6229	30	0.0005	29.3	0.0005
LEP(AP2EREBP)/col-LEP-DAP-Seq(GSE60143)/Homer	CDCCGCCGTC	1	-0.7786	0.6294	428	0.0078	425.7	0.0078
Meis1(Homeobox)/MastCells-Meis1-ChIP-Seq(GSE48085)/Homer	VGCTGWCAVB	1	-0.7688	0.6347	16107	0.2934	16076.1	0.2932
NTM2(NAC)/col-NTM2-DAP-Seq(GSE60143)/Homer	CTTRTNNNAYAAGBH	1	-0.7646	0.6365	5189	0.0945	5176.4	0.0944
RVE1(MYBrelated)/col-RVE1-DAP-Seq(GSE60143)/Homer	AAATATCT	1	-0.7577	0.64	7877	0.1435	7860.5	0.1434
HSFA6A(HSF)/col-HSFA6A-DAP-Seq(GSE60143)/Homer	RGAAGNTTCTAGAAN	1	-0.754	0.6415	632	0.0115	629.8	0.0115
SND3(NAC)/col-SND3-DAP-Seq(GSE60143)/Homer	CTTNHNNNDNAAGNH	1	-0.7395	0.65	6457	0.1176	6444.2	0.1175
ERF9(AP2EREBP)/colamp-ERF9-DAP-Seq(GSE60143)/Homer	AWATGGCGGCGG	1	-0.7372	0.6506	428	0.0078	426.5	0.0078
AP-2alpha(AP2)/Hela-AP2alpha-ChIP-Seq(GSE31477)/Homer	ATGCCCTGAGGC	1	-0.7343	0.6516	6757	0.1231	6744.1	0.123
ATHB40(HB)/col-ATHB40-DAP-Seq(GSE60143)/Homer	HCAATWATTG	1	-0.7311	0.6528	11696	0.213	11676.3	0.2129
Tbox:Smad(T-box,MAD)/ESCd5-Smad2_3-ChIP-Seq(GSE29422)/Homer	AGGTGHCAGACA	1	-0.704	0.6698	1640	0.0299	1637.6	0.0299
Pknox1(Homeobox)/ES-Prep1-ChIP-Seq(GSE63282)/Homer	SCTGTCAVTCAV	1	-0.6944	0.6753	1999	0.0364	1996.5	0.0364
dof42(C2C2dof)/col-dof42-DAP-Seq(GSE60143)/Homer	AAAAAGGC	1	-0.6906	0.677	7643	0.1392	7633.5	0.1392
PBX1(Homeobox)/MCF7-PBX1-ChIP-Seq(GSE28007)/Homer	GSCTGTCACTCA	1	-0.6884	0.6776	628	0.0114	627.9	0.0115
CBF3(AP2EREBP)/colamp-CBF3-DAP-Seq(GSE60143)/Homer	YNRCCGACATNN	1	-0.667	0.6913	1486	0.0271	1485.8	0.0271
Nr5a2(NR)/mES-Nr5a2-ChIP-Seq(GSE19019)/Homer	BTCAAGGTCA	1	-0.6633	0.6929	4747	0.0865	4743.4	0.0865
VND3(NAC)/colamp-VND3-DAP-Seq(GSE60143)/Homer	TRCTTGWDNHWCAAG	1	-0.6586	0.6952	6086	0.1108	6081.3	0.1109
At5g05790(MYBrelated)/col-At5g05790-DAP-Seq(GSE60143)/Homer	AYCTTATC	1	-0.6412	0.7065	10666	0.1943	10658.6	0.1944
ANAC050(NAC)/colamp-ANAC050-DAP-Seq(GSE60143)/Homer	WNCTTGNNNNNCAAG	1	-0.6408	0.7065	4671	0.0851	4669.2	0.0852
MYB92(MYB)/colamp-MYB92-DAP-Seq(GSE60143)/Homer	GGTAGGTR	1	-0.6301	0.7124	9046	0.1648	9041.2	0.1649
ANAC013(NAC)/col-ANAC013-DAP-Seq(GSE60143)/Homer	CTTGNNNNNCAAGNA	1	-0.6273	0.7135	3509	0.0639	3509.6	0.064
ANAC103(NAC)/col-ANAC103-DAP-Seq(GSE60143)/Homer	AACTTGNWNWNCAAG	1	-0.6159	0.7207	3277	0.0597	3278.7	0.0598
Zfp57(Zf)/H1-ZFP57.HA-ChIP-Seq(GSE115387)/Homer	NANTGCSGCA	1	-0.6073	0.7259	1379	0.0251	1381.8	0.0252
GRE(NR),IR3/A549-GR-ChIP-Seq(GSE32465)/Homer	NRGVACABNVTGTYCY	1	-0.6058	0.7261	1097	0.02	1099.6	0.0201
BPC6(BBRBPC)/col-BPC6-DAP-Seq(GSE60143)/Homer	YTYTCTCTCTCTCTA	1	-0.5897	0.7369	461	0.0084	463.4	0.0085
WRKY17(WRKY)/colamp-WRKY17-DAP-Seq(GSE60143)/Homer	GCGTTGACTTTT	1	-0.5755	0.7464	84	0.0015	85.4	0.0016
AT4G12670(MYBrelated)/col-AT4G12670-DAP-Seq(GSE60143)/Homer	AGGGTTTAGGGTTTA	1	-0.5664	0.7522	4	0.0001	4.6	0.0001
Foxa2(Forkhead)/Liver-Foxa2-ChIP-Seq(GSE25694)/Homer	CYTGTTTACWYW	1	-0.5558	0.7592	9107	0.1659	9111.2	0.1662
VND2(NAC)/col-VND2-DAP-Seq(GSE60143)/Homer	DNCKTNNNNNNNAAG	1	-0.5518	0.7612	8168	0.1488	8173.7	0.1491
MYB3(MYB)/Arabidopsis-MYB3-ChIP-Seq(GSE80564)/Homer	GKTAGGTRGG	1	-0.5412	0.7683	15903	0.2897	15904.2	0.29
NAC2(NAC)/colamp-NAC2-DAP-Seq(GSE60143)/Homer	TDCTTGNNNNNCAAG	1	-0.5408	0.7683	6235	0.1136	6242.9	0.1139
HIC1(Zf)/Treg-ZBTB29-ChIP-Seq(GSE99889)/Homer	TGCCAGCB	1	-0.5404	0.7683	18171	0.331	18170.3	0.3314
Tbet(T-box)/CD8-Tbet-ChIP-Seq(GSE33802)/Homer	AGGTGTGAAM	1	-0.5355	0.7696	11908	0.2169	11913.5	0.2173
bHLH10(bHLH)/colamp-bHLH10-DAP-Seq(GSE60143)/Homer	YACCGACA	1	-0.5322	0.7712	870	0.0158	875	0.016
AT3G60490(AP2EREBP)/colamp-AT3G60490-DAP-Seq(GSE60143)/Homer	NNRCCGACANNNNNN	1	-0.5309	0.7712	846	0.0154	851.1	0.0155
At2g44940(AP2EREBP)/colamp-At2g44940-DAP-Seq(GSE60143)/Homer	NYACCGACAHNNNNN	1	-0.5206	0.7781	691	0.0126	696.9	0.0127
PRDM9(Zf)/Testis-DMC1-ChIP-Seq(GSE35498)/Homer	ADGGYAGYAGCATCT	1	-0.5195	0.7781	3808	0.0694	3818	0.0696
CBF2(AP2EREBP)/colamp-CBF2-DAP-Seq(GSE60143)/Homer	YBRCCGACATNNNNN	1	-0.5187	0.7781	1538	0.028	1545.4	0.0282
E2F(E2F)/Hela-CellCycle-Expression/Homer	TTSGCGCGAAAA	1	-0.4986	0.7923	169	0.0031	172.7	0.0032
CUC1(NAC)/col-CUC1-DAP-Seq(GSE60143)/Homer	TACTTGTNNNACAAG	1	-0.4945	0.7945	3395	0.0618	3406.3	0.0621
AT1G76880(Trihelix)/col-AT1G76880-DAP-Seq(GSE60143)/Homer	ACGGTAAAAW	1	-0.4745	0.8095	4761	0.0867	4775	0.0871
At1g13300(G2like)/col-At1g13300-DAP-Seq(GSE60143)/Homer	GAATCTWAGATTCYN	1	-0.4733	0.8095	123	0.0022	126.4	0.0023
E2FA(E2FDP)/colamp-E2FA-DAP-Seq(GSE60143)/Homer	WWTGGCGCCAWWWNN	1	-0.4686	0.8122	1503	0.0274	1513.6	0.0276
ESE3(AP2EREBP)/col-ESE3-DAP-Seq(GSE60143)/Homer	GACGGTGG	1	-0.4653	0.8138	3663	0.0667	3678	0.0671
M1BP(Zf)/S2R+-M1BP-ChIP-Seq(GSE49842)/Homer	CAGTGTGACCGT	1	-0.4585	0.8183	2040	0.0372	2052.8	0.0374
Nr5a2(NR)/Pancreas-LRH1-ChIP-Seq(GSE34295)/Homer	BTCAAGGTCA	1	-0.4567	0.8187	6461	0.1177	6478.2	0.1181
AtIDD11(C2H2)/colamp-AtIDD11-DAP-Seq(GSE60143)/Homer	TTTGTCGTTT	1	-0.4516	0.8218	4222	0.0769	4238.2	0.0773
DEL1(E2FDP)/colamp-DEL1-DAP-Seq(GSE60143)/Homer	TTCCCGCCAA	1	-0.4484	0.8234	14	0.0003	15.6	0.0003
ARF16(ARF)/col-ARF16-DAP-Seq(GSE60143)/Homer	ATTTTACGAT	1	-0.4391	0.83	997	0.0182	1007.9	0.0184
TINY(AP2EREBP)/col-TINY-DAP-Seq(GSE60143)/Homer	NNCACCGACA	1	-0.4389	0.83	785	0.0143	794.5	0.0145
Unknown5/Drosophila-Promoters/Homer	GCTGATAASV	1	-0.4305	0.835	5905	0.1076	5925.1	0.1081
MNT(bHLH)/HepG2-MNT-ChIP-Seq(Encode)/Homer	DGCACACGTG	1	-0.4213	0.8416	9826	0.179	9849.2	0.1796
AT1G23810(Orphan)/col-AT1G23810-DAP-Seq(GSE60143)/Homer	TTCTAGAAGSTTCTA	1	-0.4029	0.8561	664	0.0121	674.8	0.0123
Gli2(Zf)/GM2-Gli2-ChIP-Chip(GSE112702)/Homer	YSTGGGTGGTCT	1	-0.4008	0.8569	2190	0.0399	2207.9	0.0403
GATA:SCL(Zf,bHLH)/Ter119-SCL-ChIP-Seq(GSE18720)/Homer	CRGCTGBNGNSNNSAGATAA	1	-0.3959	0.86	1099	0.02	1112.3	0.0203
Pho4(bHLH)/Yeast-Pho4-ChIP-Seq(GSE29506)/Homer	AAGCACGTGBGD	1	-0.3954	0.86	1294	0.0236	1308.9	0.0239
dHNF4(NR)/Fly-HNF4-ChIP-Seq(GSE73675)/Homer	GGTCCAAAGTCCAMT	1	-0.391	0.8619	369	0.0067	377.2	0.0069
GATA4(C2C2gata)/col-GATA4-DAP-Seq(GSE60143)/Homer	DDWTYAGATCTR	1	-0.384	0.8669	7731	0.1408	7759.8	0.1415
ZNF382(Zf)/HEK293-ZNF382.GFP-ChIP-Seq(GSE58341)/Homer	GNCTGTASTRNTGBCTCHTT	1	-0.3836	0.8669	262	0.0048	270	0.0049
AT1G04880(ARID)/colamp-AT1G04880-DAP-Seq(GSE60143)/Homer	AAACTATATADTATA	1	-0.3786	0.8694	1692	0.0308	1709.4	0.0312
MYB4(MYB)/col200-MYB4-DAP-Seq(GSE60143)/Homer	WAGKTAGGTARR	1	-0.3729	0.8733	6943	0.1265	6972.8	0.1272
VND6(NAC)/col-VND6-DAP-Seq(GSE60143)/Homer	DCTTNHTTTTYAMGY	1	-0.366	0.8782	9228	0.1681	9260.1	0.1689
ARE(NR)/LNCAP-AR-ChIP-Seq(GSE27824)/Homer	RGRACASNSTGTYCYB	1	-0.365	0.8782	2149	0.0391	2169.3	0.0396
GATA6(C2C2gata)/col200-GATA6-DAP-Seq(GSE60143)/Homer	TAGATCTARAHH	1	-0.3648	0.8782	1463	0.0266	1480.8	0.027
GRE(NR),IR3/RAW264.7-GRE-ChIP-Seq(Unpublished)/Homer	VAGRACAKWCTGTYC	1	-0.3443	0.894	2170	0.0395	2192.6	0.04
LMI1(HB)/colamp-LMI1-DAP-Seq(GSE60143)/Homer	AATTATTG	1	-0.3427	0.8943	10556	0.1923	10593.8	0.1932
DDF1(AP2EREBP)/col-DDF1-DAP-Seq(GSE60143)/Homer	GCCGACAT	1	-0.3424	0.8943	1338	0.0244	1356.8	0.0247
ANAC096(NAC)/colamp-ANAC096-DAP-Seq(GSE60143)/Homer	TACTTGWNNNWCAAG	1	-0.3395	0.8949	6117	0.1114	6150.8	0.1122
At2g41835(C2H2)/col-At2g41835-DAP-Seq(GSE60143)/Homer	TTTGAAAA	1	-0.3283	0.9038	7598	0.1384	7635.5	0.1392
At2g45680(TCP)/colamp-At2g45680-DAP-Seq(GSE60143)/Homer	GTGGGNCCCACNDND	1	-0.3268	0.9041	486	0.0089	498.7	0.0091
Sox17(HMG)/Endoderm-Sox17-ChIP-Seq(GSE61475)/Homer	CCATTGTTYB	1	-0.3228	0.9065	7624	0.1389	7662.9	0.1397
VND4(NAC)/colamp-VND4-DAP-Seq(GSE60143)/Homer	WRCTTGWANWWCAAG	1	-0.3146	0.9128	6141	0.1118	6178.5	0.1127
OCT4-SOX2-TCF-NANOG(POU,Homeobox,HMG)/mES-Oct4-ChIP-Seq(GSE11431)/Homer	ATTTGCATAACAATG	1	-0.3096	0.9162	2504	0.0456	2531.1	0.0462
DREB26(AP2EREBP)/col-DREB26-DAP-Seq(GSE60143)/Homer	CCACCGACAH	1	-0.3092	0.9162	771	0.014	787.7	0.0144
Unknown2/Arabidopsis-Promoters/Homer	AAACGACGTCGTTTT	1	-0.3079	0.9162	27	0.0005	30.5	0.0006
ANAC028(NAC)/col-ANAC028-DAP-Seq(GSE60143)/Homer	WRCTTGNNNNNCAAG	1	-0.3046	0.9174	6311	0.1149	6350.3	0.1158
VND1(NAC)/col-VND1-DAP-Seq(GSE60143)/Homer	CTTRWDNHWYAAGYW	1	-0.2971	0.9231	7228	0.1316	7270.4	0.1326
Sox15(HMG)/CPA-Sox15-ChIP-Seq(GSE62909)/Homer	RAACAATGGN	1	-0.2875	0.9309	11393	0.2075	11442.6	0.2087
CAMTA1(CAMTA)/col-CAMTA1-DAP-Seq(GSE60143)/Homer	WWAACGCGTT	1	-0.2865	0.9309	1543	0.0281	1567	0.0286
REF6(Zf)/Arabidopsis-REF6-ChIP-Seq(GSE106942)/Homer	TVCTCTGTTT	1	-0.2737	0.9415	6553	0.1194	6598.1	0.1203
E-box/Arabidopsis-Promoters/Homer	GCCACGTG	1	-0.2737	0.9415	2876	0.0524	2909.1	0.0531
GFY-Staf(?,Zf)/Promoter/Homer	RACTACAATTCCCAGAAKGC	1	-0.2733	0.9415	219	0.004	229.5	0.0042
ANAC057(NAC)/colamp-ANAC057-DAP-Seq(GSE60143)/Homer	DVCKTGNNNNNCAMG	1	-0.2718	0.9415	5981	0.1089	6025	0.1099
IDD4(C2H2)/col-IDD4-DAP-Seq(GSE60143)/Homer	TTTGTCTTTWTB	1	-0.2674	0.9427	10747	0.1957	10800.8	0.197
IDD5(C2H2)/colamp-IDD5-DAP-Seq(GSE60143)/Homer	TTTTGTCTTTTTBTK	1	-0.2637	0.9451	8626	0.1571	8677.3	0.1582
ATY19(MYB)/col-ATY19-DAP-Seq(GSE60143)/Homer	YYCACCWACCAT	1	-0.2598	0.9475	7145	0.1301	7194.2	0.1312
ANAC011(NAC)/col-ANAC011-DAP-Seq(GSE60143)/Homer	TDCTTGYRNNDCAAG	1	-0.2595	0.9475	3321	0.0605	3358.2	0.0612
At1g77640(AP2EREBP)/col-At1g77640-DAP-Seq(GSE60143)/Homer	TGTCGGTGGA	1	-0.2587	0.9475	660	0.012	678.6	0.0124
ANAC083(NAC)/col-ANAC083-DAP-Seq(GSE60143)/Homer	CKTRWNNNWYAMGTA	1	-0.2568	0.9475	6456	0.1176	6504.1	0.1186
EBNA1(EBV-virus)/Raji-EBNA1-ChIP-Seq(GSE30709)/Homer	GGYAGCAYDTGCTDCCCNNN	1	-0.2552	0.9475	122	0.0022	130.8	0.0024
ERF7(AP2EREBP)/col-ERF7-DAP-Seq(GSE60143)/Homer	ATGRCGGCGG	1	-0.2548	0.9475	4367	0.0795	4409.2	0.0804
ANAC070(NAC)/colamp-ANAC070-DAP-Seq(GSE60143)/Homer	CTTRHDNHNBAAGHW	1	-0.2524	0.9476	11131	0.2027	11188.4	0.204
ANAC020(NAC)/col-ANAC020-DAP-Seq(GSE60143)/Homer	DVCKTGHNNNDCAAG	1	-0.2416	0.9567	5127	0.0934	5174.6	0.0944
At5g66730(C2H2)/colamp-At5g66730-DAP-Seq(GSE60143)/Homer	TTTGTCKTTTTK	1	-0.2385	0.9585	3105	0.0566	3144.4	0.0573
NRF1(NRF)/MCF7-NRF1-ChIP-Seq(Unpublished)/Homer	CTGCGCATGCGC	1	-0.2295	0.966	158	0.0029	168.9	0.0031
BIM3(bHLH)/col-BIM3-DAP-Seq(GSE60143)/Homer	TWVTCACGTGAB	1	-0.2275	0.9667	648	0.0118	668	0.0122
AT1G10720(BSD)/col-AT1G10720-DAP-Seq(GSE60143)/Homer	TTCTAGAAKCTTCTA	1	-0.2178	0.9749	429	0.0078	446.7	0.0081
FHY3(FAR1)/Arabidopsis-FHY3-ChIP-Seq(GSE30711)/Homer	HHCACGCGCBTN	1	-0.2172	0.9749	961	0.0175	986.6	0.018
HSFB4(HSF)/col-HSFB4-DAP-Seq(GSE60143)/Homer	TTCTAGAAGCTTCTA	1	-0.2117	0.9786	516	0.0094	535.4	0.0098
ANAC092(NAC)/colamp-ANAC092-DAP-Seq(GSE60143)/Homer	WRCKTGWNNNWCAMG	1	-0.2111	0.9786	3062	0.0558	3105.4	0.0566
bHLH18(bHLH)/col-bHLH18-DAP-Seq(GSE60143)/Homer	CACGTGTTYCACGTG	1	-0.2093	0.9786	110	0.002	119.2	0.0022
ANAC094(NAC)/col-ANAC094-DAP-Seq(GSE60143)/Homer	DVCGTRNNNNNYACG	1	-0.1979	0.9885	827	0.0151	852.5	0.0155
ZNF692(Zf)/HEK293-ZNF692.GFP-ChIP-Seq(GSE58341)/Homer	GTGGGCCCCA	1	-0.1977	0.9885	1134	0.0207	1163.5	0.0212
[truncated: 168 more rows]
